# Supplementary material
Source: publisher figshare collection journal article supplement (https://wiley.figshare.com/ndownloader/files/20151881)
Supplement: Supplementary file 1 [file 20151881]

## Sheet: Day 10 - End Result Amplitudes 
RT (min)	145p_1	146p_1	147p_1	148p_1	150p_duplicate_1	151p_1	153p_1	154p_1			121p_1	122p_1	123p_1	124p_1	126p_1						127p_1	128_1	129p_1	130p_1	131p_1	132p_1						133p_1	134_1	135p_1	136p_1	137p_1	138p_1						139_1	140__2_1	141_1	142p_1	143p_1
	control	control	control	control	control	control	control	control	AVERAGE		EE2	EE2	EE2	EE2	EE2	average	RT (min)	Mass	EE2 - CTL		DEET	DEET	DEET	DEET	DEET	DEET	average	RT (min)	Mass	DEET - CTL		Diphen	Diphen	Diphen	Diphen	Diphen	Diphen	average	RT (min)	Mass	Diphen - CTL		Fluox	Fluox	Fluox	Fluox	Fluox	average	RT (min)
10.7183	6133549	6171062	6802282	8353179	8016559	10418025	10439776	7075760	7926274		27168710	8587073	6418715	6403858	6424454	11000562	10.7183	73	0		6336492	80844368	7715036	8155230	8123511	5270492	1.94075e+07	10.7183	73	0		6769617	7792832	40559	7946052	7752607	1	5050278	10.7183	73	0		62148308	12400724	7857756	11599615	10940144	2.09893e+07	10.7183
26.2942	6397585	7478045	6875251	9762490	10231690	13988521	13209226	7156741	9.38744e+06		14609281	10841484	6456728	5676152	8231789	9.16309e+06	26.2942	73	0		1878294	695508	7815149	11208348	9524772	4670217	5.96538e+06	26.2942	73	0		8512765	10299831	9957050	8041646	9811626	4862205	8.58085e+06	26.2942	73	0		1	2008826	10519188	15445875	10157261	7.62623e+06	26.2942
11.1633	4007584	4610565	4417581	4104116	5739219	7812185	7033494	4207299	5.24151e+06		19774014	5006322	4065274	4155899	4787060	7.55771e+06	11.1633	73	0		3908726	56742948	4959287	6366573	5381821	4012952	1.35621e+07	11.1633	73	0		4950896	4343307	229645	4864656	5613329	1	3333639	11.1633	73	0		46243720	6830384	3898051	6846067	6163746	1.39964e+07	11.1633
18.7992	6320113	6923136	9057160	11062111	1	14309058	14252219	8581538	8813167		1	11387504	6830654	4909576	7292239	6.08399e+06	18.7992	73	0		6771454	4080285	1	6867487	10813982	4192164	5.45423e+06	18.7992	73	0		1	10194265	11912836	9558370	1	6728924	6.39907e+06	18.7992	73	0		1	1	11958008	12552447	14910470	7.88419e+06	18.7992
14.7767	3199382	4178819	6223954	8035557	7568683	10042360	10028131	6100262	6.92214e+06		8309511	7825127	5492250	3699153	5347658	6.13474e+06	14.7767	73	0		5540737	2148934	6295003	8185693	8407283	3086398	5.61067e+06	14.7767	73	0		4226269	7447353	9077555	7031291	7623627	3846702	6.54213e+06	14.7767	73	0		1364359	12666781	8781811	11111558	10857969	8.9565e+06	14.7767
10.7175	3592662	3715349	4071006	4735561	4646164	6279555	5720044	4134438	4.61185e+06		14470181	5056751	3887452	3762370	3669097	6.16917e+06	10.7175	116	0		3503186	41369904	4580393	4789323	4562405	3095917	1.03169e+07	10.7175	116	0		4145351	4496208	42954	4658500	4493640	6386286	4.03716e+06	10.7175	116	0		30982906	6701501	4258252	6227837	6351887	1.09045e+07	10.7175
12.7125	1	4106356	5058554	7300730	144016	9304408	9337593	4846195	5.01223e+06		16695836	7065763	4360933	4237772	4094378	7.29094e+06	12.7125	73	0		5297936	15481722	4538522	7531280	7412511	3055341	7219552	12.7125	73	0		4460723	7130277	1150778	5985198	6944964	3969288	4.9402e+06	12.7125	73	0		345015	11696694	7796576	9306159	9378299	7.70455e+06	12.7125
10.4733	6518094	7045549	7187463	9034755	8427664	307816	10961812	7440050	7.1154e+06		1	9263704	6580880	7050260	7632805	6105530	10.4733	73	0		7759115	810286	8254096	8950239	8720904	5959186	6.7423e+06	10.4733	73	0		7584963	8925605	1	8213318	8280390	1	5500713	10.4733	73	0		270996	13145890	8918856	1	11622884	6.79173e+06	10.4733
17.4558	3334446	5036218	5935182	7358432	5143983	9522388	8602652	5752587	6335736		8796017	7334498	4514804	1	4101750	4949414	17.4558	73	0		5566508	2343089	5467069	7716370	3465308	2930172	4.58142e+06	17.4558	73	0		5199757	6871662	6380605	4729243	7400956	3693008	5.71254e+06	17.4558	73	0		1	4957560	7003156	6004848	10256220	5644357	17.4558
26.0042	4687569	7285454	8069306	5624789	1803333	10699918	7942770	7891767	6.75061e+06		4068868	9940946	1	5173160	7625082	5.36161e+06	26.0042	73	0		973032	346824	7050667	8791052	1486156	1	3.10796e+06	26.0042	73	0		7853553	9513901	9750150	8343718	7695434	4523880	7.94677e+06	26.0042	73	0		23877	502334	9792326	2803376	6158338	3.85605e+06	26.0042
10.4275	1	6022419	6917220	8552671	7927940	10466390	10586545	6897389	7.17132e+06		24682634	8649058	1	1	1	6666339	10.4275	116	0		1	1	1	8793206	8412511	1	2.86762e+06	10.4275	116	0		1	8519507	1	1	8173956	1	2.78224e+06	10.4275	116	0		7853	12531491	8779049	11241850	11219018	8.75585e+06	10.4275
12.7492	4245873	3967289	4429578	5923444	144875	6793952	7609336	4413336	4.69096e+06		12040246	5857858	4186779	4036228	4267974	6077817	12.7492	147	0		4378346	12997846	4721919	5912390	5794994	3432582	6.20635e+06	12.7492	147	0		4379641	5911042	881321	5198579	5332513	3853090	4.25936e+06	12.7492	147	0		311268	9557951	6424690	6374910	7982898	6.13034e+06	12.7492
22.1683	5050809	1	1	8901440	8898005	12234142	11262432	7278105	6.70312e+06		1	9573986	4763292	5900444	7250815	5.49771e+06	22.1683	73	0		7418119	1677	6325791	1	1	3502056	2.87461e+06	22.1683	73	0		7167488	1	1	7855185	8872783	3972695	4.64469e+06	22.1683	73	0		19239	15069465	1	1	12847255	5.58719e+06	22.1683
14.0558	1	5929560	6630398	8426936	1	10998012	6482511	6392880	5.60754e+06		2994778	8392053	5526811	1	6137631	4.61025e+06	14.0558	73	0		6359864	6295946	6634368	1	8441778	3710153	5.24035e+06	14.0558	73	0		4439228	1	6329947	7034791	8050448	3913006	4.96124e+06	14.0558	73	0		3152020	11885068	8795215	1097562	11208451	7.22766e+06	14.0558
22.2708	1	6845762	7908522	1	6376882	1	10688234	1	3.97743e+06		31140596	1	1	1	1	6228120	22.2708	73	0		1	4578	5198555	9826258	9728204	1	4.12627e+06	22.2708	73	0		1	9030006	10409104	1	6585424	1	4.33742e+06	22.2708	73	0		61089	1	9827224	14291428	1	4.83595e+06	22.2708
21.4025	3227878	3677851	5291759	7786663	5067660	10282706	7328590	5938536	6.07521e+06		1	6566997	3679304	3242748	4567450	3611300	21.4025	73	0		5270715	12693	4005994	7076092	5725893	3216681	4.21801e+06	21.4025	73	0		4311697	6543467	7936653	4420730	5356131	3318335	5.3145e+06	21.4025	73	0		1	7092984	6537269	4721422	6165962	4.90353e+06	21.4025
14.0992	3668670	4233336	6379102	7596035	8687818	1	6817717	5337720	5.34005e+06		8515103	8552585	5215951	4016455	4957354	6.25149e+06	14.0992	73	0		1	1	1	9003218	6713137	3157021	3.14556e+06	14.0992	73	0		4569161	1	10498259	6273958	8750850	2935432	5.50461e+06	14.0992	73	0		1	1	1	10021289	1	2.00426e+06	14.0992
19.4333	3812878	4817465	1	1	8029407	9414434	6066292	1	4.01756e+06		3378569	9833940	6582492	1	5436230	5.04625e+06	19.4333	73	0		6848570	1	1	10271782	1	1	2.85339e+06	19.4333	73	0		6045003	1	8488153	1	8149742	4275086	4.493e+06	19.4333	73	0		1	13307967	1	14043566	5240175	6518342	19.4333
11.1642	1763957	2247612	2135366	1988661	2986888	3562887	3602575	1987620	2.53445e+06		9284846	2479059	1996681	1928194	2278809	3.59352e+06	11.1642	147	0		1894554	30050336	2319886	3174568	2645276	1920555	7.00086e+06	11.1642	147	0		2398609	2114392	44850	2422020	2768740	1	1.62477e+06	11.1642	147	0		22138236	3247018	1937719	3416059	2936871	6.73518e+06	11.1642
26.55	4797289	1755098	7008100	1934975	2904594	3870972	3436184	6962148	4083670		2131706	6947313	5325177	5344156	5380950	5.02586e+06	26.55	73	0		315526	119267	3297960	2929870	1846210	4806826	2.21928e+06	26.55	73	0		3001325	7656392	7851388	7278506	1922408	3140129	5.14169e+06	26.55	73	0		18271	337258	6391496	9303240	1848363	3.57973e+06	26.55
18.1775	4472396	1	7354905	9296831	1	1	4506050	1	3.20377e+06		469708	9021788	6519335	5799343	1	4362035	18.1775	73	0		7204457	13386	1	1	9131986	1	2724972	18.1775	73	0		6497718	1	1	7694703	8725799	1	3.8197e+06	18.1775	73	0		10629	1	9122354	1	10083594	3.84332e+06	18.1775
14.7908	2518057	3147761	3661474	4460885	4009622	5415425	5762596	3239020	4026855		3954426	3532283	3003693	2982104	3292458	3.35299e+06	14.7908	174	0		3641650	779940	3709468	3820023	3966272	1	2.65289e+06	14.7908	174	0		2893520	4453244	4767477	3702987	3417817	2586510	3.63693e+06	14.7908	174	0		19153	6655489	4212192	5345265	5391437	4.32471e+06	14.7908
15.9792	3742426	3371319	2409833	3883048	9031747	4185174	5052561	3584187	4.40754e+06		967409	3607950	3088217	3917038	6144618	3.54505e+06	15.9792	73	0		6444592	107057	5301787	5790011	1268101	4688351	3.93332e+06	15.9792	73	0		2477987	4087880	9504961	3901199	2729880	3426565	4.35475e+06	15.9792	73	0		1	2611912	3054273	4160947	3034174	2.57226e+06	15.9792
10.3725	4887819	1	1	1	7295391	12158149	1	1	3.04267e+06		24258488	7765622	1	1	1	6.40482e+06	10.3725	73	0		5992172	1	1	7914485	7712974	1	3.60327e+06	10.3725	73	0		1	7993991	99349	6405432	1	1	2.41646e+06	10.3725	73	0		1	1	7137240	11497254	1	3.7269e+06	10.3725
22.44	5867907	6160388	6990381	8797907	8034035	1	1	1	4.48133e+06		1	8693844	1	5760321	6839651	4.25876e+06	22.44	73	0		6824111	76366	7014005	1	8581491	1	3.74933e+06	22.44	73	0		6434288	1	3335592	8012476	8204704	5520525	5.25126e+06	22.44	73	0		1	1	8802198	1	1	1.76044e+06	22.44
18.6975	5034705	6337486	1	1	7241582	1	1	1	2.32672e+06		13137960	1	1	1	8324283	4.29245e+06	18.6975	73	0		7386126	1	6822355	1	1	1	2.36808e+06	18.6975	73	0		7881116	1	1	1	10615154	4984290	3.91343e+06	18.6975	73	0		259026	16804934	1	1	1	3.41279e+06	18.6975
8.78333	1	2840553	3216189	3172651	3021371	3889055	4920488	3606003	3.08329e+06		9832421	6104565	4721203	3872528	4201088	5746361	8.78333	73	2.66307e+06		4875189	5415292	4334062	5828322	6415847	1	4.47812e+06	8.78333	73	0		5181394	1	112253	5997628	4273270	3921177	3.24762e+06	8.78333	73	0		1	1	940477	5207086	1155792	1.46067e+06	8.78333
20.9017	5162504	5706900	5503803	2952439	1370847	3262199	1358646	3007847	3.54065e+06		322258	1647710	5899065	4226490	4728495	3.3648e+06	20.9017	73	0		4647800	9252	6526542	7963868	4846109	3547319	4.59015e+06	20.9017	73	0		1020011	3697459	1456445	1738074	8688963	5039592	3.60676e+06	20.9017	73	0		5468	8832082	1420927	1963690	1812220	2.80688e+06	20.9017
19.4308	3838525	4424919	4397810	6295961	5535367	1	4666328	4548215	4.21339e+06		1	5849581	4004161	1	4571498	2.88505e+06	19.4308	156	0		5430750	1	5906695	5048538	2157709	1	3.09062e+06	19.4308	156	0		4137152	6577785	3695266	5094769	4329365	4630141	4.74408e+06	19.4308	156	0		1	4828367	5658974	4995334	4109805	3.9185e+06	19.4308
11.6067	1341267	3906965	3892743	4719460	1115123	5018771	1986302	2245729	3028295		1831496	5501737	3675087	4208964	4487857	3.94103e+06	11.6067	147	0		4845919	1	4170809	3287287	3077040	3800704	3196960	11.6067	147	0		4109777	5134489	1	4897427	5420626	4072055	3.93906e+06	11.6067	147	0		1	4816105	5760562	303954	6712053	3518535	11.6067
24.9317	3840781	4703353	7259323	1885179	9093282	3378884	1083811	6892353	4.76712e+06		1	3019604	5718664	3799825	1	2507619	24.9317	73	0		3633801	1	5881038	8449314	2704483	1	3444773	24.9317	73	0		5930918	5211965	3562734	6226363	7978682	3691581	5.43371e+06	24.9317	73	0		1	1	2294171	1	1	458835	24.9317
22.3783	1	1	1	1	1	9405920	9804972	1	2.40136e+06		1	1	5538343	5385595	1	2.18479e+06	22.3783	73	0		1	1	6311794	8156989	7827699	1	3.71608e+06	22.3783	73	0		1	1	1	1	7470489	1	1.24508e+06	22.3783	73	0		1	1	8538891	11034067	10864903	6.08757e+06	22.3783
21.2458	1	6077143	7536896	7880747	1	1956484	9490542	1	4.11773e+06		1	2329843	4500274	1	5592986	2484621	21.2458	73	0		4397269	9765	4893034	2519006	2595292	1	2.40239e+06	21.2458	73	0		7025618	1	660072	2577886	8376874	3665420	3.71765e+06	21.2458	73	0		11130	1	1	2193620	8785019	2.19795e+06	21.2458
18.1192	1	6785806	7260822	1	8884050	5354605	1	7278346	4445454		1	1	1	1	7442239	1.48845e+06	18.1192	73	0		1	1	6975769	6290905	8936600	1	3.70055e+06	18.1192	73	0		6765789	4548331	1787320	1	1	1	2.18357e+06	18.1192	73	0		1	3636555	1	8248237	1	2376959	18.1192
10.3458	1	5456444	1	1	1	1	9582311	1	1.87985e+06		1	1	5515227	5326435	5964790	3.36129e+06	10.3458	73	0		1	10734885	1	1	1	4638144	2.56217e+06	10.3458	73	0		1	1	139332	1	7137375	1	1.21279e+06	10.3458	73	0		1	1	1	1	1	1	10.3458
11.6075	999307	3578358	3164449	3752617	712831	4698566	1379115	1644246	2.49119e+06		1053001	4773323	2800005	3487316	3909023	3.20453e+06	11.6075	73	0		4296372	1	3380325	2151696	2175832	3163484	2.52795e+06	11.6075	73	0		3203084	4689516	1	3825692	4502960	3768537	3.33163e+06	11.6075	73	0		1	3759827	4726375	306253	6798389	3118169	11.6075
12.84	3431849	3042293	2751853	3456205	3963744	4186552	4499175	2942626	3.53429e+06		1926498	2653634	2033395	3278152	3932453	2.76483e+06	12.84	73	0		1899609	1	3812646	2380811	2286503	3467795	2.30789e+06	12.84	73	-1.22639e+06		2433806	2241938	3515290	2245588	3295669	3216394	2.82478e+06	12.84	73	0		1	1673272	1833414	4426272	2276616	2041915	12.84
22.3008	4850750	1	5857212	7550265	1	1	1	1	2282279		1	7586266	1	1	5339476	2585149	22.3008	73	0		5481164	7707	1	1	7412546	1	2.15024e+06	22.3008	73	0		5434851	7845699	1	6918662	1	1	3.36654e+06	22.3008	73	0		1	12280141	9747322	1	9812128	6.36792e+06	22.3008
10.3967	1784288	2160879	2410486	2957766	2869208	4054497	3505680	2455425	2.77478e+06		7988250	3117911	2076198	2050375	2276373	3.50182e+06	10.3967	147	0		2470314	263266	1	2984427	2848678	1757894	1.72076e+06	10.3967	147	0		2156431	2963704	101006	1	2850219	1	1345227	10.3967	147	1345227		1	4290727	3117820	3828744	4149650	3.07739e+06	10.3967
18.3567	1	1	2464441	4357718	2082728	3013725	5138593	3465327	2.56532e+06		1073316	2131495	2491869	1	3515291	1.84239e+06	18.3567	73	0		4352783	524524	3012187	1999648	2495966	3693169	2.67971e+06	18.3567	73	0		2587240	4537648	2144553	2356305	2037496	1	2.27721e+06	18.3567	73	0		1252244	3450582	3284557	1934496	3235226	2631421	18.3567
18.8008	3035425	3403889	4188641	5057154	18186	1	6486721	3625093	3.22689e+06		1	1	2914616	2737304	3593368	1849058	18.8008	147	0		3900365	1	1	1	4926639	2827204	1.94237e+06	18.8008	147	0		3622519	1	5169041	4471671	1	3152770	2.736e+06	18.8008	147	0		6558	1	5628249	1	6651715	2.4573e+06	18.8008
16.5275	3567858	2677950	1783748	2249115	1958225	4217492	3594880	3412192	2.93268e+06		666703	1999421	2324652	3528106	5105305	2.72484e+06	16.5275	73	0		2376578	4998	2634765	1400628	697104	4182009	1.88268e+06	16.5275	73	0		1616630	3128634	4493634	2106344	1732493	3493068	2.7618e+06	16.5275	73	0		39909	1112901	2935470	1860635	1615923	1.51297e+06	16.5275
19.47	1	1	6328986	9133094	6707442	1	1	6486546	3582009		1	1	1	4473963	1	894793	19.47	73	0		4820973	1	1	1	8236530	4042213	2.84995e+06	19.47	73	0		1	8922669	1	6807849	1	1	2.62175e+06	19.47	73	0		1	1	7922751	1	1	1584551	19.47
14.5975	3507308	2345477	4408523	1874251	4650824	1684968	3357889	3791793	3.20263e+06		805887	1742569	2127831	1791619	3464281	1.98644e+06	14.5975	73	0		824539	49948	2927554	2253258	1492104	2221997	1.62823e+06	14.5975	73	-1.5744e+06		1621261	1785568	5369205	3164250	2267432	3008439	2.86936e+06	14.5975	73	0		24078	968262	2242497	1940051	1843873	1.40375e+06	14.5975
14.9958	2230185	3366644	2451723	2847078	6593031	621180	998572	4821176	2.9912e+06		759767	3400154	1802884	2021303	1305167	1857855	14.9958	147	0		2632957	1	3341301	2937302	4782645	3897564	2.93196e+06	14.9958	147	0		199337	3379934	1214990	1032674	886093	1189467	1.31708e+06	14.9958	147	0		2761	2735071	5843627	1035919	593593	2.04219e+06	14.9958
22.2592	2193194	1	1	1	1	1	4494218	1	835927		11771098	2915030	2151222	2006521	1	3.76877e+06	22.2592	147	0		1	1	2495692	3932111	3806040	1	1705641	22.2592	147	0		2301266	3754344	4025524	1	2830691	1	2.15197e+06	22.2592	147	0		1	6028823	4206048	5442992	1	3135573	22.2592
17.0558	3429868	5183223	2469809	2539123	192972	3726060	2173913	3415078	2.89126e+06		228611	2136257	430104	424807	2799124	1.20378e+06	17.0558	70	0		3477230	149511	235441	101899	1478383	785392	1037976	17.0558	70	-1.85328e+06		5492298	1413434	562524	6119136	626623	4512904	3.12115e+06	17.0558	70	0		6377	1550714	2789579	1129571	1097451	1.31474e+06	17.0558
10.4617	6039985	6469144	1	1	1	1	1	1	1.56364e+06		1	1	6393014	6408360	7006223	3.96152e+06	10.4617	116	0		7156155	11883	7480595	1	1	5677445	3387680	10.4617	116	0		7068032	1	4535565	8018725	1	1	3.27039e+06	10.4617	116	0		2585	1	1	1	1	517.8	10.4617
26.305	1595303	1615389	1796121	2090963	2368465	3579530	3224284	1699146	2.24615e+06		2731723	2781020	1582985	1524080	2144836	2.15293e+06	26.305	147	0		357796	130782	2171060	2777273	2049476	1177025	1443902	26.305	147	0		2118353	2778930	2276093	2047771	2177810	1531071	2.155e+06	26.305	147	0		1	398273	2867998	4071327	2082417	1.884e+06	26.305
22.24	1	2428336	2990976	3669772	3241663	4672514	1	2744213	2.46843e+06		1	3697732	2329836	2282404	2739277	2209850	22.24	147	0		2759366	920	2590501	1	1	1747459	1.18304e+06	22.24	147	0		2674032	1	1	3245774	3389329	1946117	1.87588e+06	22.24	147	0		2085	1	1	1	5162841	1.03299e+06	22.24
18.7558	2946255	3381655	1	1	2314536	6264545	1	1	1.86337e+06		3706635	4694685	1	1	3717894	2.42384e+06	18.7558	147	0		1	1069828	2350027	2070324	1	1	915030	18.7558	147	0		3752651	3829722	1	1	4789409	2971112	2.55715e+06	18.7558	147	0		35305	6136254	1	4253497	1	2.08501e+06	18.7558
14.79	1206462	1372162	2114053	2464807	2377779	3057122	3094986	1702706	2.17376e+06		1902294	2088463	1732261	1410140	1638263	1.75428e+06	14.79	147	0		1705939	368958	2095625	2180347	2377131	1	1.45467e+06	14.79	147	0		1457585	2509941	2729960	2168412	2004002	1247697	2.0196e+06	14.79	147	0		94118	3901179	2555413	3138360	3214085	2580631	14.79
10.7167	1012393	922742	1033469	1299223	1201268	1512205	1583401	1049551	1.20178e+06		4170895	1297178	969728	954177	986611	1.67572e+06	10.7167	75	0		980789	15206023	1192875	1128731	1161477	882939	3.42547e+06	10.7167	75	0		1050183	1261374	1	1140242	1205471	1	776212	10.7167	75	0		10402328	1900764	1290136	1669460	1662230	3.38498e+06	10.7167
24.9675	1	4396820	1	1	7049766	1	534786	5355100	2.16706e+06		271408	1	4208227	4063081	7169441	3.14243e+06	24.9675	73	0		1	7468	4797099	8527771	1	4029515	2.89364e+06	24.9675	73	0		4852968	1	1	1	1	3995608	1.47476e+06	24.9675	73	0		3121	4260963	1	1208078	611285	1.21669e+06	24.9675
14.1075	1923752	1	2322426	2132970	4717500	2513960	2301469	1902170	2226781		2893103	2801027	1954637	1254089	1	1.78057e+06	14.1075	147	0		1	1	1374937	2952786	1040234	445318	968880	14.1075	147	0		1	2142351	5588535	2268415	2849703	1	2141501	14.1075	147	0		1	2939360	2982584	3925814	2740215	2.51759e+06	14.1075
18.2108	1	5302479	1	8409828	1	1	1	6545917	2.53228e+06		297591	1	5517338	5409614	5934555	3.43182e+06	18.2108	73	0		1	1	6147372	1	1	4207938	1.72589e+06	18.2108	73	0		1	1	1	1	1	4568232	761373	18.2108	73	0		18339	1	1	1	1	3668.6	18.2108
22.505	6415581	6493098	1	1	1	1	1	6769577	2.45978e+06		1	1	6396756	6377080	1	2.55477e+06	22.505	73	0		1	3945	7419289	1	1	5510552	2.15563e+06	22.505	73	0		6927160	1	1	1	1	6236742	2.19398e+06	22.505	73	0		834013	1	1	1	1	166803	22.505
12.6858	1	1189921	1405509	2045675	48238	2661078	2643214	1	1.2492e+06		5109747	2000828	976273	1173510	1151967	2082465	12.6858	66	0		1438364	5031817	1263314	2148426	2000935	910515	2.13223e+06	12.6858	66	0		1304135	1986522	344286	1620742	1953746	1069107	1.37976e+06	12.6858	66	0		127178	3249738	2141667	2746259	2578846	2.16874e+06	12.6858
17.07	2742793	2658978	1445813	1685434	518282	2171697	1202220	2684769	1.88875e+06		280579	2497866	1052983	410607	1446092	1.13763e+06	17.07	73	0		3638251	1	1101255	1072757	2204119	1246166	1.54376e+06	17.07	73	0		4002722	1159664	370444	4387687	661603	3406380	2.33142e+06	17.07	73	0		1	1056934	1492627	3354284	803484	1341466	17.07
10.7158	841122	864299	964992	1182375	1108703	1423807	1410963	992001	1.09853e+06		3679278	1196179	908732	881745	892467	1.51168e+06	10.7158	74	0		883721	11289580	1076559	1144811	1133927	798224	2721137	10.7158	74	0		939370	1116730	1	1099888	1108557	1	710758	10.7158	74	0		8781769	1687026	1065754	1556148	1536198	2925379	10.7158
20.9242	3159102	3068257	2805151	1195968	1	1469342	542340	1322895	1695382		125429	644150	4030334	2014260	2316014	1.82604e+06	20.9242	100	0		2245595	1	4363867	4007116	2208580	1	2.13753e+06	20.9242	100	0		324176	1639281	652910	704913	5314121	3150768	1.96436e+06	20.9242	100	0		1	4373146	613197	760324	698400	1.28901e+06	20.9242
24.93	2864719	2806011	3379611	826158	2800926	1532413	498583	3289912	2.24979e+06		417	1227496	3023318	2690411	3021783	1992685	24.93	142	0		1392016	1	3311065	2369327	1124359	2505428	1.7837e+06	24.93	142	0		2948394	2167095	8100	2563480	3276764	2690602	2.27574e+06	24.93	142	0		1	10427	950586	1	408205	273844	24.93
19.3758	1	1	1	1	9446817	1	1	1	1180853		1	1	1	4888007	1	977602	19.3758	73	0		1	78220	6482391	1	9517081	1	2.67962e+06	19.3758	73	0		1	1	1	1	9336150	4274988	2.26852e+06	19.3758	73	0		94640	15274695	1	1	1	3.07387e+06	19.3758
14.0767	1540223	1	1913252	2391563	1678443	2769915	1764979	1826525	1.73561e+06		931903	2319715	1756555	1573552	1785378	1.67342e+06	14.0767	299	0		1854590	1	1863890	2241040	2360112	1	1.38661e+06	14.0767	299	0		1802657	2335073	1601939	2157357	2264606	1	1.69361e+06	14.0767	299	0		1	2754149	2256444	76622	2972145	1.61187e+06	14.0767
18.2917	1	1	2573642	3801062	1508402	1335148	1613512	3411478	1.78041e+06		643035	2113124	1	1	1	551232	18.2917	73	0		3585718	1	1	1910022	3237293	3244926	1.99633e+06	18.2917	73	0		3054187	1585227	723798	2663407	2549190	4541941	2519625	18.2917	73	0		1	1	2205784	1673792	2504846	1.27688e+06	18.2917
26.1833	5513160	1	8745840	57448	1	57936	1	1	1.7968e+06		1	1	7151133	5532906	1	2.53681e+06	26.1833	73	0		32998	3523	1	1	1	4504680	756867	26.1833	73	0		1	105988	11092975	8572559	1	1	3.29525e+06	26.1833	73	0		2839	45355	166014	1	55277	53897.2	26.1833
22.3233	1974159	2011365	2367650	2915390	2789234	3475386	1	1	1.94165e+06		1	2824744	2116358	1	2282113	1.44464e+06	22.3233	147	0		1	1	2361934	3203677	2867073	1580530	1.66887e+06	22.3233	147	0		1	2943817	3161059	1	1	1853560	1.32641e+06	22.3233	147	0		1	4689532	1	1	1	937907	22.3233
17.4692	1	1736069	2265456	2549158	1	2949727	2556081	1969090	1.7532e+06		2192609	1	1784470	1	1619742	1.11936e+06	17.4692	147	0		1771678	529000	2034015	2739880	1	1116025	1.3651e+06	17.4692	147	0		1	2580735	1735098	1	2552614	1335397	1.36731e+06	17.4692	147	0		1	1	2060870	1	3317713	1.07572e+06	17.4692
25.9892	1902033	1720930	2163266	1463380	487604	2444921	2043392	2055072	1.78507e+06		1193171	2677263	2073422	1	1	1.18877e+06	25.9892	204	0		284205	87805	1883634	2148643	443099	1480523	1.05465e+06	25.9892	204	0		1961366	2531817	3024020	2648994	1899409	1	2.01093e+06	25.9892	204	0		5462	142762	2844090	685518	1660087	1.06758e+06	25.9892
21.4042	1045377	1103242	1663609	2623288	1388853	3483187	2492605	1959742	1.96999e+06		1	2276758	1172193	961633	1432944	1.16871e+06	21.4042	75	0		1889304	4773	1201784	2484908	1925211	822303	1.38805e+06	21.4042	75	0		1367715	2198627	2876872	1414439	1	959745	1.46957e+06	21.4042	75	0		1	2452185	2197402	1584177	2129343	1.67262e+06	21.4042
17.4575	1374648	1380732	1624116	1860414	1921983	1973890	1835355	1465132	1.67953e+06		1817017	1467218	1538476	1415982	1589041	1.56555e+06	17.4575	248	0		1283937	441576	1713857	1981757	783125	1226993	1.23854e+06	17.4575	248	0		1138964	2019102	1305831	1089641	1963740	1371795	1.48151e+06	17.4575	248	0		244	974413	1553883	1218896	2267621	1.20301e+06	17.4575
15.0633	3483220	1345184	1195561	1253962	1	1160154	1723016	3133395	1.66181e+06		1	1723720	2233586	1204219	1686472	1.3696e+06	15.0633	73	0		1108648	139269	2100846	1131587	2424819	1598132	1.41722e+06	15.0633	73	0		3190849	3465311	1	1895994	1161459	1940136	1.94229e+06	15.0633	73	0		17753	2559915	2957192	1	2615845	1.63014e+06	15.0633
25.9767	1772445	1876770	2331124	1277861	359870	2521030	1779578	2222531	1.76765e+06		849848	2846139	2104040	1	1	1.16001e+06	25.9767	133	0		202894	64271	1832197	2112548	310178	1312503	972432	25.9767	133	0		2121186	2740545	3099972	2684887	1775392	1	2.07033e+06	25.9767	133	0		4580	100613	2946244	513232	1372627	987459	25.9767
21.38	1623938	1759210	1532304	2145500	2457150	2766008	2023627	1563855	1983949		227013	1656259	1449547	1629545	1608008	1.31407e+06	21.38	246	-669875		1492365	1	1947610	1885764	1441301	1556610	1.38728e+06	21.38	246	0		1212260	1805011	2142404	1260718	1806237	1564565	1.63187e+06	21.38	246	0		1	1884453	1777066	1284388	1575879	1.30436e+06	21.38
14.5983	2569251	1689373	2712930	1110638	2892671	1236163	2267213	2297514	2.09697e+06		653112	1102217	1407541	1434147	2193364	1.35808e+06	14.5983	142	0		449214	1	2038647	1659547	814893	1368315	1.0551e+06	14.5983	142	-1.04187e+06		1336836	1172789	3231585	2054763	1494497	2110419	1.90015e+06	14.5983	142	0		1	507434	1566820	1491725	1212878	955772	14.5983
9.00083	1040363	1388840	1122327	1139616	1310180	1103832	1368124	1573078	1255795		2309659	2220775	2309062	2011434	1937824	2.15775e+06	9.00083	152	901956		3003198	2169452	1741067	2164409	2530610	1127460	2.1227e+06	9.00083	152	866904		2320430	12934	11903	2076531	1231206	2212356	1.31089e+06	9.00083	152	0		1	2045524	1	1639267	1	736959	9.00083
8.81667	1	2148598	2205356	1816706	978954	1804377	1412747	1705965	1509088		3479136	1633570	1455699	1797809	1179578	1.90916e+06	8.81667	72	0		1665435	397044	2385159	2833163	2102346	639728	1.67048e+06	8.81667	72	0		1531329	30831	36951	2042365	2588196	1923664	1.35889e+06	8.81667	72	0		53625	1	1	1640695	34724	345809	8.81667
21.2967	3498785	1	6176484	1	7633744	1	1	1	2.16363e+06		924373	1	3772868	4449638	5563767	2.94213e+06	21.2967	73	0		1	48915	4732546	1	1	3644248	1.40429e+06	21.2967	73	0		1	2162278	1	1	1	3298813	910182	21.2967	73	0		22098	1	1	1	1	4420.4	21.2967
15.8058	1277757	1461336	1668725	796200	326470	1037860	2237197	3104275	1.48873e+06		1269209	1356566	2048546	1182968	797985	1.33105e+06	15.8058	73	0		2010078	8101	2004844	964137	1875244	1788997	1.4419e+06	15.8058	73	0		2158158	2560838	517013	1557551	685156	2542365	1.67018e+06	15.8058	73	0		1815	2105289	3083674	905261	1138250	1.44686e+06	15.8058
12.6617	820057	932588	1153079	1611285	24221	1981018	2024797	1	1.06838e+06		2861358	1596696	1	917089	992421	1273513	12.6617	113	0		1230377	2374511	993548	1712811	1613865	784045	1.45153e+06	12.6617	113	0		1017163	1620112	149708	1299142	1531966	899062	1.08619e+06	12.6617	113	0		51384	2576811	1686025	1705545	2158956	1.63574e+06	12.6617
11.7333	1535994	1084456	892026	1281120	1078352	1184513	1411753	1147916	1.20202e+06		1869112	1354612	1017085	1175443	997728	1282796	11.7333	73	0		991419	3014784	1247092	1664251	1381701	1187146	1.58107e+06	11.7333	73	0		791026	1479243	818853	801391	839667	1138396	978096	11.7333	73	0		1922997	1740608	1214585	1090946	1515006	1.49683e+06	11.7333
26.2933	1134950	964713	1249563	1227181	1440598	2228542	1973237	1326411	1.44315e+06		1336224	1753446	1146602	1073392	1376571	1337247	26.2933	160	0		168715	54654	1300602	1667245	1191759	897343	880053	26.2933	160	0		1278735	1818390	1678889	1532838	1270230	982402	1426914	26.2933	160	0		1	184151	1888029	2645556	1157878	1175123	26.2933
14.0517	848709	1130819	1289625	1834066	1	2115581	952157	1277029	1.181e+06		385737	1719023	1291696	1056579	1273630	1145333	14.0517	133	0		1428822	879599	1288135	1794858	1745504	1	1.18949e+06	14.0517	133	0		1247562	1849957	1031808	1470478	1644734	777738	1.33705e+06	14.0517	133	0		447618	2102688	1836537	1	2247061	1326781	14.0517
14.5108	2029992	1683724	1506105	1509507	1950947	1308590	1756145	1971433	1.71456e+06		629584	1621625	1453188	1500431	2316099	1.50419e+06	14.5108	73	0		752735	60386	2033366	972067	1411251	1	871634	14.5108	73	-842921		966758	1665384	1358842	1516784	1498627	1655009	1.44357e+06	14.5108	73	0		35995	859029	1486806	1085118	1278173	949024	14.5108
12.8408	1823533	1539641	1371061	1455522	1824530	1932555	2023431	1326688	1.66212e+06		1027365	1232692	1122498	1565172	1863949	1.36234e+06	12.8408	144	0		755290	1011	1941229	1097356	981356	1686514	1077126	12.8408	144	-584994		1312178	1192436	1565661	1258045	1463345	1347876	1.35659e+06	12.8408	144	1.35659e+06		1	659210	903360	2048884	1018539	925999	12.8408
12.7475	1055905	947035	1240721	1728736	55221	2217944	2065065	1041550	1.29402e+06		4213907	1	958021	919568	936120	1.40552e+06	12.7475	75	0		1304622	4415466	1008513	1665891	1	1	1.39908e+06	12.7475	75	0		1029379	1625142	311259	1374434	1684292	785402	1.13498e+06	12.7475	75	0		131737	1	1802907	2282331	1	843395	12.7475
22.2733	891882	1292931	1560946	1776985	1	2459528	2075567	1	1.25723e+06		5846490	1	892538	832843	1	1.51437e+06	22.2733	100	0		1489098	1	1034292	1900110	1949329	767551	1.19006e+06	22.2733	100	0		1012888	1786930	2090911	1	1	1	815122	22.2733	100	0		1	1	1949604	2796379	1	949197	22.2733
25.9933	1484396	1534652	1996785	1026605	284990	2043349	1465787	1844703	1.46016e+06		655000	2389248	1776690	1	1	964188	25.9933	147	0		151905	53612	1506214	1726414	242221	1097039	796234	25.9933	147	0		1759357	2270760	2657837	2265925	1447814	1	1.73362e+06	25.9933	147	0		3801	76934	2476137	470439	1105894	826641	25.9933
18.0783	5132876	4608547	1	1	1	1	1	1	1.21768e+06		1	1	1	4872857	1	974572	18.0783	73	0		5648914	6207	1	1	3281859	3800028	2122835	18.0783	73	0		1	1	1	1	1	5732171	955363	18.0783	73	0		2413	1	1	1	1	483.4	18.0783
14.1083	1023374	1	1352675	1201691	2944244	1537968	1465012	1121789	1.33084e+06		1844602	1739944	1133546	638916	619297	1195261	14.1083	117	0		1	1	799958	1847267	575644	273366	582706	14.1083	117	0		489375	1308148	3684713	1267681	1785204	1	1.42252e+06	14.1083	117	0		1	1885886	1852492	2601136	1746341	1.61717e+06	14.1083
22.2783	1018910	998560	1215419	1570711	1	1905618	1991296	1150995	1.23144e+06		4731865	1409968	1	1	1101551	1.44868e+06	22.2783	174	0		1190529	1	1163775	1661085	1561384	1	929462	22.2783	174	0		1	1581968	1	1393500	1340518	948841	877472	22.2783	174	0		1	2551091	1820971	2201000	2160696	1.74675e+06	22.2783
22.3325	1	1	1	1	1	1	1	1	1		1	1	1	1	1	1	22.3325	73	#DIV/0!		1	1	1	1	1	1	1	22.3325	73	#DIV/0!		5684845	1	8122401	1	1	1	2.30121e+06	22.3325	73	0		12794	1	1	10943978	1	2191355	22.3325
17.0583	2010857	3237191	1165758	1182273	70801	1889931	984787	1892219	1.55423e+06		88508	1088555	188269	184755	1380504	586118	17.0583	188	0		2054148	49914	106556	41336	742759	393658	564728	17.0583	188	0		3561266	603562	231121	3937132	264936	2767172	1.8942e+06	17.0583	188	0		1	655886	1338629	490676	456795	588397	17.0583
10.3525	1	1	6551587	1	1	1	1	1	818949		1	1	1	1	1	1	10.3525	116	0		1	10835707	1	1	1	1	1805952	10.3525	116	0		1	1	1	1	1	1	1	10.3525	116	0		7055	1	1	1	1	1411.8	10.3525
18.2033	571444	1674994	2112052	2843250	85696	635893	310112	1953768	1.2734e+06		256426	1236464	1872501	1217734	466493	1.00992e+06	18.2033	174	0		1923022	1	1535703	1608499	1438713	377791	1.14729e+06	18.2033	174	0		1374071	1699212	281856	1910350	2026775	858709	1.3585e+06	18.2033	174	0		1	1	2238523	57912	1537196	766727	18.2033
18.1667	1	2525802	2864785	3762011	1	1	1294575	2934143	1.67266e+06		48374	1	2664514	1	1	542578	18.1667	147	0		2903763	2685	3002285	1	3393694	1	1.5504e+06	18.1667	147	0		3120955	1	1	3026674	3158031	1	1.55094e+06	18.1667	147	0		1	1	3079205	1	1	615842	18.1667
18.1633	1131151	1389628	1665079	2114300	1489621	1	614554	1568795	1.24664e+06		94765	1672998	1396989	1286639	1525166	1.19531e+06	18.1633	116	0		1625161	1	1485223	1047032	1863756	1120690	1.19031e+06	18.1633	116	0		1581080	830975	245044	1680256	1858485	1223536	1.23656e+06	18.1633	116	0		1	1	1902304	1	1551371	690736	18.1633
12.6433	3226882	4040338	1	41080	620056	1	9387	4606186	1.56799e+06		655691	1	3925130	3572188	4351548	2.50091e+06	12.6433	73	0		1	1434	3758473	1	1	3059007	1.13649e+06	12.6433	73	0		3698602	1	712363	1	1	1	735162	12.6433	73	0		824874	1	1	1	1	164976	12.6433
12.0333	814826	907105	1191860	962351	607417	708578	921885	961623	884456		1417487	1491693	1321376	1546430	1543044	1464006	12.0333	73	579550		2069926	1252061	1249910	1051647	1604840	1173517	1.40032e+06	12.0333	73	515861		1351224	1391297	821820	753090	880054	2083783	1.21354e+06	12.0333	73	0		629300	1064139	1100779	827428	1331600	990649	12.0333
9.47583	1378182	3578042	1	1962159	1	1	1	3682025	1.32505e+06		1	1	427992	407971	1	167193	9.47583	73	0		965630	980755	24574	1	58432	211430	373470	9.47583	73	0		1	1	1	1	1	4315813	719303	9.47583	73	0		1	181688	1144258	84571	130488	308201	9.47583
18.1558	1248653	1447076	1526895	2049210	1699609	1	645736	1602408	1.27745e+06		1	1626516	1401791	1311220	1670613	1.20203e+06	18.1558	115	0		1618681	410	1540731	903848	1889707	1	992230	18.1558	115	0		1525859	1	238884	1566773	1682516	1222988	1.0395e+06	18.1558	115	0		1	1	1630678	1316575	1589230	907297	18.1558
19.7942	1	1	185615	118612	1	1	1	83995	48528.4		1	1	38266	17271	1	11108	19.7942	73	0		1	63025	1	249130	1	1	52026.5	19.7942	73	0		1	1	1	116785	1	217847	55772.7	19.7942	73	0		38650056	1	1	1	1	7730012	19.7942
29.335	2178119	929363	1260124	763948	1385064	237505	370280	1712381	1104598		133198	685196	1349399	912806	956186	807357	29.335	73	0		830097	109636	1035383	405675	971600	1708624	843502	29.335	73	0		857686	1457458	8169789	1029803	881097	42754	2.0731e+06	29.335	73	0		1	1435200	1190941	1034066	653573	862756	29.335
17.52	1	1304720	1484855	1847517	1417138	2278255	1979046	1426522	1.46726e+06		1681686	1	1	1	1120928	560523	17.52	100	0		1373307	415641	1	1985528	1	734406	751481	17.52	100	0		20195	1727745	1394036	1	1	946438	681403	17.52	100	0		1	1	1562919	7630	2521960	818502	17.52
17.4175	4373317	1	1	1	6991230	1	1	1	1.42057e+06		1	1	4732068	4363384	5579868	2.93506e+06	17.4175	73	0		1	1	1	1	1	2698464	449745	17.4175	73	0		1	1	1	1	1	4916724	819455	17.4175	73	0		2525	1	1	1	1	505.8	17.4175
12.6667	720081	757141	864836	1134699	22314	1287970	1448005	819725	881846		2177968	1104547	768222	719499	773551	1.10876e+06	12.6667	148	0		823248	2131564	847133	1125878	1122692	627542	1.11301e+06	12.6667	148	0		805594	1166789	141112	968887	1028436	716524	804557	12.6667	148	0		50935	1839271	1221179	1186922	1535852	1.16683e+06	12.6667
21.3658	824826	873787	1121153	1804755	1101554	2444465	1547026	1267832	1.37317e+06		187141	1366708	827110	817427	1152622	870202	21.3658	84	0		1232893	1	1037155	1535895	1170712	782194	959808	21.3658	84	0		850977	1423394	1902017	881260	1212999	807700	1.17972e+06	21.3658	84	0		7653	1421781	1399872	898999	1190868	983835	21.3658
20.9267	1929387	1750279	1628500	715065	126979	945887	298854	851633	1030823		68978	384179	2541709	1264128	1373712	1.12654e+06	20.9267	188	0		1331562	1	2731613	2333684	1328160	1	1.2875e+06	20.9267	188	0		171581	1017097	404673	424931	2906019	2414631	1.22316e+06	20.9267	188	0		1	2618197	374260	450410	391284	766830	20.9267
15.3042	1008816	2276994	1501003	783525	3442387	1935944	793720	1305808	1.63102e+06		200899	408496	395243	201723	846714	410615	15.3042	73	-1.22041e+06		381406	202240	509629	604986	723559	1287606	618238	15.3042	73	-1.01279e+06		1689421	1101980	2905387	1268037	282489	2306617	1.59232e+06	15.3042	73	0		1	240130	1079449	947813	597138	572906	15.3042
17.425	1425718	1699898	1992003	2476166	2399100	1	1	1889550	1.4853e+06		1	2299416	1584405	1507752	1894617	1.45724e+06	17.425	86	0		1	1	1820444	1	997898	993752	635350	17.425	86	0		1703815	2210412	933	1422099	2473583	1621173	1.572e+06	17.425	86	0		1	1346096	1	1699245	1	609069	17.425
21.2817	1	1854653	2798174	2424365	1516962	316170	2990859	265825	1.52088e+06		1	417140	1	775486	1438184	526162	21.2817	100	0		1159193	1434	1078945	1	509737	1406929	692706	21.2817	100	0		2532883	284175	129349	541606	3073119	1083094	1.27404e+06	21.2817	100	0		247	82953	119166	421021	2409647	606607	21.2817
18.7975	827551	946340	1520489	1929616	1	2386750	2279054	1423051	1.41411e+06		1	1	1096144	780934	963422	568100	18.7975	75	0		954863	757615	1	1083624	1845900	594315	872720	18.7975	75	0		1	1693731	2085642	1507571	1	814860	1.01697e+06	18.7975	75	0		57918	1	2009678	2218673	2631495	1383553	18.7975
29.8033	6027699	2025286	3617222	300619	1	77552	761878	3293110	2.01292e+06		1	1	1	166996	413266	116053	29.8033	73	0		128865	190165	1	1	262965	1738	97289.2	29.8033	73	0		2238255	8588601	1	1	1	1	1.80448e+06	29.8033	73	0		11819	1484227	2110098	534695	127049	853578	29.8033
20.9942	1	1490154	1242788	1146281	2462394	584579	745698	885878	1.06972e+06		108949	856502	1	1434374	1108405	701646	20.9942	73	0		1614106	1	1	1771723	1109808	3880044	1.39595e+06	20.9942	73	0		950169	638127	523991	846658	1	4441200	1.23336e+06	20.9942	73	0		2892	1057473	544283	1184979	867033	731332	20.9942
12.7483	780212	743121	819162	1125094	14509	1211620	1423560	813756	866379		1822010	1059384	734519	717793	752791	1.0173e+06	12.7483	156	0		803395	1502445	795427	1073498	1083139	597407	975885	12.7483	156	0		795868	1126748	93859	904574	962569	674369	759664	12.7483	156	0		28038	1808677	1172755	1059315	1565953	1.12695e+06	12.7483
22.345	1	1	1	1721930	1	2087544	2190870	1353866	919277		1	1709936	1269494	1207651	1	837417	22.345	326	0		1394802	1	1444552	1817706	1748194	1	1.06754e+06	22.345	326	0		1	1761905	1876180	1	1651556	1186598	1.07937e+06	22.345	326	0		1	2746603	1799273	1	1	909176	22.345
10.3758	905834	1016337	1113919	1	1289337	1798159	1704032	1	978452		3940021	1	1	964609	1	980927	10.3758	117	0		1	1378796	1	1393191	1344622	855656	828711	10.3758	117	0		1	1344324	8056	1	1299425	1	441968	10.3758	117	0		1	2021307	1	1773787	1866451	1.13231e+06	10.3758
20.0542	382150	2985083	526275	933213	1	1767220	2787537	894116	1.28445e+06		43374	1005429	306315	395813	1115147	573216	20.0542	73	0		5584874	1	75569	1	1667321	1077778	1400924	20.0542	73	0		1163348	941205	359422	1094930	96754	687222	723814	20.0542	73	0		1	1145017	868751	370946	825040	641951	20.0542
10.7825	2031154	339700	273338	521274	512850	1988699	214953	294999	772121		346141	467360	184608	465550	249247	342581	10.7825	73	0		960610	1	3012643	2743370	1991454	3937824	2.10765e+06	10.7825	73	1.33553e+06		226636	461889	1	1150135	592998	1	405277	10.7825	73	0		1	348418	147696	2187684	219032	580566	10.7825
22.3875	1	2111907	1	1	1	1	3640016	1	718991		1	1	1	2106444	1	421290	22.3875	147	0		2211442	1	2530169	3078618	1	1	1303372	22.3875	147	0		1	1	1	1	1	1	1	22.3875	147	0		4518	1	3069728	4154378	4123260	2270377	22.3875
22.4258	2111720	2219907	2530307	3216913	2945985	1	1	1	1.6281e+06		1	3115001	1	1	2449210	1.11284e+06	22.4258	147	0		2345669	11573	1	1	3078163	1	905901	22.4258	147	0		1	1	684240	2868190	3006828	1	1.09321e+06	22.4258	147	0		1	1	1	1	1	1	22.4258
18.2533	5090041	1	1	1	1	1	1	1	636256		1	1	1	4834172	1	966835	18.2533	73	0		5911602	161	1	1	1	4542609	1.7424e+06	18.2533	73	0		1	1	1	1	1	4996387	832732	18.2533	73	0		1	1	1	1	1	1	18.2533
18.2075	1	2917401	1	3871955	1	1	1	3080826	1.23377e+06		1	1	2765264	2542293	3097942	1.6811e+06	18.2075	147	0		1	1	3106824	1	1	2557336	944027	18.2075	147	0		1	1	1	1	1	2507702	417951	18.2075	147	0		2294	1	1	1	1	459.6	18.2075
22.215	770103	914700	1087946	1297540	1190922	1681846	1542787	989629	1.18443e+06		1	1324758	836109	843037	1014302	803641	22.215	133	0		1057340	1	958294	1	1	624248	439981	22.215	133	-744453		978992	1	1	1152505	1243615	722729	682974	22.215	133	0		2281	2119789	1	1	1807849	785984	22.215
9.44167	1	1	543418	1	253099	1013852	1026833	1	354651		1350275	449702	1	1	1736440	707284	9.44167	73	0		1	3441273	452372	557417	528929	1	829999	9.44167	73	0		6669595	99278	729715	6229435	297137	1	2.33753e+06	9.44167	73	0		429406	845369	1	1203254	1070504	709707	9.44167
10.715	464438	480067	525657	619400	601046	811415	731505	544078	597201		1831527	653395	505194	489521	475418	791011	10.715	117	0		444721	5405451	598581	607842	583659	406008	1.34104e+06	10.715	117	0		538490	574810	3485	616847	589128	1049276	562006	10.715	117	0		4051403	854558	546622	781782	816833	1.41024e+06	10.715
18.0925	1243201	1561814	1670281	1	1749561	924373	692440	1	980209		1	1737336	1560073	1	1	659482	18.0925	254	0		1	1	1805008	973153	1997826	1	795998	18.0925	254	0		1774176	502375	254377	1821304	1849359	1	1.0336e+06	18.0925	254	0		1	382628	1846375	1391492	1747140	1.07353e+06	18.0925
21.3792	1006511	1051807	947931	1450103	1	2092169	1287488	1064188	1.11252e+06		4883	1069881	924780	957082	995143	790354	21.3792	147	0		865436	1	1230513	1187246	917181	1	700063	21.3792	147	0		730998	1167921	1454241	775118	1112977	925315	1.02776e+06	21.3792	147	0		1	1164907	1126988	763127	1016105	814226	21.3792
19.3783	365683	347651	177314	92443	2832391	251198	72296	102050	530128		44093	2449409	1934594	1418325	308188	1.23092e+06	19.3783	232	0		1554266	130	665493	2935411	1	1293607	1074818	19.3783	232	0		107852	145837	1681403	69896	2725698	591748	887072	19.3783	232	0		1	5103662	112600	4001382	46674	1.85286e+06	19.3783
11.7342	790277	788247	663142	976244	645266	781244	1077228	660723	797796		1201084	1058121	763981	766803	731536	904305	11.7342	147	0		836216	1312612	825676	1092042	836131	1026466	988190	11.7342	147	0		704149	1145209	483685	608710	735700	856929	755730	11.7342	147	0		1	1249807	1005761	615405	1106675	795530	11.7342
10.4625	840592	930994	953032	1186484	1099842	1	1404205	948568	920465		959728	1201862	827004	888493	1000842	975586	10.4625	75	0		1054530	1124258	1065006	1015042	1057500	784141	1.01675e+06	10.4625	75	0		1006121	1160470	1	996026	1	653105	635954	10.4625	75	0		621870	1717496	1181054	1	1517876	1.00766e+06	10.4625
8.81833	1	695002	768663	661417	673154	790068	1059008	833069	685048		2052065	1523341	1297000	986248	1061666	1384064	8.81833	100	699016		1445002	1052652	1062029	1476065	1684043	728143	1.24132e+06	8.81833	100	556275		1483499	1	17371	1533889	1030830	1050215	852634	8.81833	100	0		3016	1	1	1144309	1918	229849	8.81833
12.6633	522071	582412	708846	948184	21279	1147678	1197919	1	641049		1775658	953041	583253	563211	608767	896786	12.6633	133	0		730157	1733051	627989	1012707	947561	481836	922217	12.6633	133	0		609886	961210	115037	786479	900784	550371	653961	12.6633	133	0		43243	1528391	1011390	1007149	1309546	979944	12.6633
13.8983	666826	193024	781143	380952	1555761	409767	805440	565326	669780		412104	780823	718438	901083	329970	628484	13.8983	73	0		328271	229210	822893	637214	867084	1934580	803209	13.8983	73	0		1	669182	4966135	398782	1240647	588510	1.31054e+06	13.8983	73	0		789850	1092072	844468	2380371	451232	1.1116e+06	13.8983
21.2675	1	1303280	2104834	1786534	1543297	340062	2117222	1	1.1494e+06		1	367656	1667133	1	1122591	631476	21.2675	147	0		838298	2395	1050408	389668	421524	1273345	662606	21.2675	147	0		1894857	267177	126790	440906	2299817	756837	964397	21.2675	147	0		2811	138888	1	392070	1776514	462057	21.2675
22.2775	662193	649399	817626	1067202	1	1289096	1338646	764386	823569		3072951	910629	649058	606347	1	1.0478e+06	22.2775	188	0		780493	1	747613	1101361	1040928	1	611733	22.2775	188	0		1	1065610	1	914061	865189	615155	576670	22.2775	188	0		1	1742209	1242402	1462934	1489945	1.1875e+06	22.2775
10.4467	1	809673	797139	984061	923343	1234394	1165840	826833	842660		2068125	1017401	707762	767940	770503	1.06635e+06	10.4467	190	0		906334	426198	877981	973840	931291	1	685941	10.4467	190	0		851801	973539	844	927108	927686	1	613496	10.4467	190	0		1447	1252262	989540	1120809	1313868	935585	10.4467
14.7892	537268	705476	855071	1047978	923943	1264725	1348867	746957	928786		793488	808441	684089	666399	740990	738681	14.7892	175	0		819166	145780	838204	863140	917861	1	597359	14.7892	175	0		636043	1022891	1094486	840106	784529	563008	823510	14.7892	175	0		3489	1510968	964974	1209185	1236270	984977	14.7892
26.5708	1415899	299064	1423086	359376	533524	757313	654044	1390055	854045		381576	1370299	1459597	1100635	1052594	1.07294e+06	26.5708	147	0		46655	20075	643437	556759	354009	1159834	463462	26.5708	147	0		576503	1502347	2519989	1491172	373314	578544	1.17364e+06	26.5708	147	0		4193	61654	1262744	1851444	349091	705825	26.5708
21.8158	287958	631483	604146	1643518	276410	420286	725523	1012263	700198		89590	625996	572981	951674	963347	640718	21.8158	73	0		3622949	1	526700	273432	403621	3153165	1329978	21.8158	73	0		952422	1275462	64665	657739	498412	736913	697602	21.8158	73	0		1	1055436	1163991	448519	1177972	769184	21.8158
26.2925	575847	727728	614455	938745	985903	1367419	1259310	1	808676		1305848	1044576	592150	496818	807392	849357	26.2925	74	0		164789	57435	737285	1065463	912968	410319	558043	26.2925	74	0		823931	1002698	924852	723711	943332	448639	811194	26.2925	74	0		1152	173074	1003595	1493689	945953	723493	26.2925
19.4267	1	1	1	1	3720474	6531223	1	1	1.28146e+06		2584432	1	2656203	1	1	1.04813e+06	19.4267	156	0		1	1	1	1	1	3300221	550038	19.4267	156	0		1	1	1	1	1	1	1	19.4267	156	0		1	1	1	1	1	1	19.4267
17.4708	403700	759313	881546	1082142	627068	1383560	1269182	845954	906558		1378882	1102348	1	506773	1	597601	17.4708	75	0		837151	365294	1	975687	551002	1	454856	17.4708	75	-451702		858963	886376	967519	668860	1110390	385138	812874	17.4708	75	0		1	813869	1146553	929001	1577728	893430	17.4708
22.185	984433	1	1	1	1694379	1	2165655	1401230	780713		1	1876239	1047706	1130829	1474045	1105764	22.185	100	0		1	1	1255699	1	1	1	209284	22.185	100	0		1353120	1	1	1541583	1744503	858938	916358	22.185	100	0		2129	2982107	1	1	2560088	1.10887e+06	22.185
19.4408	654499	1	1102014	1	1183915	1675114	1071533	1	710885		671490	1	950286	1	1	324356	19.4408	75	0		901858	1	819289	1465873	1252694	1	739953	19.4408	75	0		1132735	1417767	1662189	1145903	1501815	598214	1.2431e+06	19.4408	75	0		1	2095845	1417198	2343514	985241	1.36836e+06	19.4408
18.1392	1207906	1	1513629	2064994	1	1	732846	1609388	891096		1	1685287	1377909	1335797	1612920	1.20238e+06	18.1392	102	0		1606074	1	1566894	1	1947510	1	853414	18.1392	102	0		1529337	466944	1	1545199	1673778	1	869210	18.1392	102	0		1	1	1644020	1	1	328805	18.1392
25.99	893397	875298	1161876	551148	155312	1136961	806133	1046431	828320		338576	1362272	1076612	744511	1082348	920864	25.99	217	0		82509	24210	841927	984339	128956	717466	463234	25.99	217	0		973583	1294001	1774674	1359785	809750	812344	1.17069e+06	25.99	217	0		1670	40613	1457929	287317	611975	479901	25.99
8.75	1	1	1	372116	1	1	54528	1	53331.2		1	1	1	1	1	1	8.75	73	0		1	171685	1	1	1	1	28615	8.75	73	0		1	6481245	1154407	259567	1	1	1.31587e+06	8.75	73	0		3934692	4905843	5258563	1	5162188	3.85226e+06	8.75
14.0858	1	1	1	1	1	1	1	1	1		1	1	1	3978813	1	795763	14.0858	73	0		1	1	1	1	1	1	1	14.0858	73	#DIV/0!		1	8124489	1	1	1	1	1.35408e+06	14.0858	73	0		1	1	1	1	1	1	14.0858
17.0733	1268574	435685	505433	607511	336953	754147	383836	1240890	691629		216287	1489302	678233	323187	269327	595267	17.0733	102	0		1935110	1118	797347	826683	1527145	438777	921030	17.0733	102	0		2303108	541459	176062	2289760	379899	1417332	1.1846e+06	17.0733	102	0		327	382247	364149	2229036	312760	657704	17.0733
22.305	1	1	1	1714146	1	2015003	1	1321824	631372		4691629	1	1229441	1	1	1.18421e+06	22.305	326	0		1331711	1	1	1	1723171	1	509148	22.305	326	0		1310916	1	1	1588706	1	1	483271	22.305	326	0		1	2706737	1	1	2293007	999949	22.305
26.2983	738714	551122	1	699054	815487	1308560	1122636	871752	763416		746858	1128910	741841	691171	860157	833787	26.2983	217	0		102290	31255	782856	982416	663394	592252	525744	26.2983	217	0		765142	1156766	1115303	1	721016	605170	727233	26.2983	217	0		1	111260	1175317	1668843	655219	722128	26.2983
21.2767	1	1282934	2088410	1791762	776528	203178	2214560	142976	1.06254e+06		2956	291018	1947894	430143	967288	727860	21.2767	232	0		858015	376	1	1	1	1352432	368471	21.2767	232	0		1837226	162608	100993	416972	2229832	848668	932716	21.2767	232	0		1	1	60276	300527	1824348	437031	21.2767
18.86	1	902694	1188351	1481181	1	1878576	1836950	1083264	1.04638e+06		1	1	848743	753579	968706	514206	18.86	133	0		1087274	355107	19515	642281	1434803	748262	714540	18.86	133	0		950181	1	1582804	1260148	17939	793745	767470	18.86	133	0		1245	12123	1648686	1	1968852	726181	18.86
25.9517	5970769	1	1	1	1	1	1	1	746347		1	1	6355322	1	1	1.27107e+06	25.9517	73	0		1	1	1	1	1	4109782	684964	25.9517	73	0		1	1	10447696	1	1	1	1.74128e+06	25.9517	73	0		2080	1	1	1	1	416.8	25.9517
18.0275	1	1	1	4770844	1	1	1	2658739	928699		41660	1	3194835	3842170	1	1.41573e+06	18.0275	73	0		1	8848	1	1	1	3577640	597749	18.0275	73	0		1	1	1	1	1	1	1	18.0275	73	0		2758	1	1	1	1787258	358004	18.0275
22.425	1260358	1289190	1473700	1838823	1685205	1	1	1393483	1.1176e+06		1	1807237	1	1	1419686	645385	22.425	326	0		1461652	1	1506596	1	1816280	1127144	985279	22.425	326	0		1	1	1	1676307	1751818	1218130	774376	22.425	326	0		1	1	1873727	1	1	374746	22.425
21.2542	1	1436906	1736807	1856117	1	1	2348829	1	922333		1	1	884956	1	1334060	443804	21.2542	75	0		1186285	4276	1277529	1	1	607588	512613	21.2542	75	0		1632011	478096	240651	636799	2035485	1	837174	21.2542	75	0		1	1	1	680019	2159487	567902	21.2542
26.3175	390125	693958	485826	937573	918941	1306929	1200679	511638	805709		1463184	1	438451	392986	727386	604402	26.3175	75	0		193916	76245	691549	980845	909610	304972	526190	26.3175	75	0		763752	916119	770944	521072	919393	1	648547	26.3175	75	0		1	200473	916281	1420863	974109	702345	26.3175
18.6683	744564	1045648	87372	292514	1231826	1	120161	1	440261		2369877	1902924	175056	150344	1424058	1.20445e+06	18.6683	75	0		1233246	1	1157292	1	42964	521356	492477	18.6683	75	0		1402877	64578	1	21468	1826243	679760	665821	18.6683	75	0		1	2920416	92529	1	1	602590	18.6683
19.9942	1838602	1614437	678828	702713	24831	1	944126	1273689	884653		33918	872415	1388671	1378950	1067916	948374	19.9942	73	0		1	99887	1	550500	1578017	770573	499830	19.9942	73	0		1885643	1613065	1	1151588	552151	1	867075	19.9942	73	0		92224	837033	1503431	408290	763064	720808	19.9942
26.3033	535264	498526	620758	636070	753742	1177689	1030148	705786	744748		701930	926991	532341	533981	724896	684028	26.3033	157	0		88985	25990	688518	881711	618385	420870	454076	26.3033	157	0		680693	951848	713448	805724	659766	504949	719405	26.3033	157	0		3137	96680	975338	1388922	596172	612050	26.3033
18.3467	1	864977	794252	1	682867	1045473	1724384	1029311	767658		261513	609761	762121	1	1066799	540039	18.3467	147	0		1	93777	983507	527063	732891	2443965	796867	18.3467	147	0		868348	1358700	754718	680396	557664	1	703304	18.3467	147	0		198792	1063902	960589	534003	964045	744266	18.3467
14.1025	880353	831366	1289526	1539846	1677294	1	1026900	1110016	1.04441e+06		1223942	1	1	846166	1005484	615119	14.1025	133	0		1	1	1	1	1424116	748781	362150	14.1025	133	-682263		965662	1	1939788	1324853	1631694	1	977000	14.1025	133	0		1	1	1	1491563	1	298313	14.1025
26.01	440775	780455	882423	649027	248217	1327987	950325	843590	765350		467303	1065713	631541	578756	815635	711790	26.01	75	0		115384	46420	773256	1001596	166000	339525	407030	26.01	75	0		834052	1028445	998067	799545	888421	439830	831393	26.01	75	0		1	56787	1017974	315868	701116	418349	26.01
19.3833	711493	858637	1	1	1695667	1	1	1	408225		1	1833565	1234225	977317	975415	1.0041e+06	19.3833	75	0		1303212	1	1171056	1822814	1895546	490843	1113912	19.3833	75	0		1	1	1	1	1842092	637573	413278	19.3833	75	0		1	2931492	1	2620943	1	1.11049e+06	19.3833
8.84417	1	575140	616312	495632	502478	577267	774701	663153	525586		1461377	1236746	1115958	839936	869671	1.10474e+06	8.84417	174	579152		1285643	677692	870857	1248085	1419590	568716	1.01176e+06	8.84417	174	486178		1242386	1920	515	1239046	804109	919982	701326	8.84417	174	0		1704	1	3033	852107	1	171369	8.84417
14.1058	731356	1	752798	729823	1493178	767186	748817	704472	740954		982450	873351	665147	495079	490556	701317	14.1058	205	0		1	1	442196	946665	437573	260575	347835	14.1058	205	0		407725	680184	1740757	819185	909416	1	759545	14.1058	205	0		1	948977	1011713	1298617	873558	826573	14.1058
8.14	1	1127681	1047830	1	1013568	1	770499	1070809	628799		2438060	1118045	1103324	1113283	755	1.15469e+06	8.14	160	0		1	1	1213300	1541315	1431911	747651	822363	8.14	160	0		1015705	133	1	1145488	584	1180683	557099	8.14	160	0		428	1	155	1188698	29	237862	8.14
14.7742	288630	402487	607451	786790	725032	979061	967950	595658	669132		756226	727005	503782	356500	511219	570946	14.7742	74	0		556260	183059	605622	742289	801103	310278	533102	14.7742	74	0		394466	706673	885107	658083	714292	341169	616632	14.7742	74	0		110920	1193399	815608	1025495	1000924	829269	14.7742
10.38	1	1	1	1043102	994411	1648344	1	1	460733		3323854	1058733	1	1	1	876518	10.38	75	0		876444	1884949	1	978101	1006445	1	790990	10.38	75	0		1	1123407	1	821865	1079856	1	504188	10.38	75	0		1	1	1046592	1504807	1400264	790333	10.38
18.7983	679690	751070	801108	880406	280023	1085992	1217827	574947	783883		411301	734524	414825	404413	787145	550442	18.7983	245	0		708086	112175	270147	242343	823494	501924	443028	18.7983	245	-340855		715890	551459	840772	789372	799264	720580	736223	18.7983	245	0		912	876232	1044603	543651	1127081	718496	18.7983
18.6933	490734	657542	963847	1	752984	1477002	1	1	542764		1244383	1187671	1	1	888767	664165	18.6933	74	0		799083	1	709857	1	1175587	1	447422	18.6933	74	0		849910	1061847	1285882	1	1125631	499970	803874	18.6933	74	0		20967	1786860	1	1306676	1	622901	18.6933
22.2575	754073	1	1	1	1	1	1	1	94260		4186228	1005198	1	714689	1	1.18122e+06	22.2575	133	0		1	1	876698	1387418	1366496	1	605102	22.2575	133	0		815173	1334182	1457932	1	1000272	1	767927	22.2575	133	767927		1	1	1475673	1951157	1	685367	22.2575
11.6058	266259	768488	740707	867315	196474	968400	352263	407867	570972		303985	1033048	667704	814819	864662	736844	11.6058	148	0		936549	1	780321	584183	551031	743018	599184	11.6058	148	0		769399	974316	1	902118	1038653	809340	748971	11.6058	148	0		1748	895384	1078709	42477	1334706	670605	11.6058
8.07917	1	1155726	1022091	1	897502	1	610423	1042305	591006		2024042	1029478	1083515	1134145	660	1054368	8.07917	175	0		1	1	1167117	1478493	1369048	698742	785567	8.07917	175	0		968173	3480	1	1078249	1	1234214	547353	8.07917	175	0		1	4610	2939	995871	5096	201703	8.07917
14.0217	1099106	1	536265	531461	1552706	723415	962808	921987	790969		376362	849136	746296	931829	971706	775066	14.0217	158	0		314351	1019	1337300	50346	455606	1600237	626476	14.0217	158	0		509998	933274	90346	517551	631511	1	447114	14.0217	158	0		1	338045	941810	707872	512921	500130	14.0217
14.0283	328067	603831	657108	826379	840828	1083142	618410	633096	698858		290867	816546	524324	485300	608877	545183	14.0283	74	0		637792	537009	655939	824115	820043	403869	646461	14.0283	74	0		620466	1	601845	685155	789638	369084	511032	14.0283	74	0		271416	1130832	836709	116139	1085243	688068	14.0283
10.4742	1962744	2296728	1	116762	1	176158	1	1	569050		51637	1	2196904	2268553	2443134	1.39205e+06	10.4742	147	0		1	214540	2643227	1	1	1997802	809262	10.4742	147	0		2449910	1	1	2759893	1	1	868301	10.4742	147	0		1	125202	1	147295	59788	66457.4	10.4742
18.7817	546994	611181	744026	908720	393718	1107221	1116111	634768	757842		613741	830191	507094	469030	1	484011	18.7817	148	0		681161	174709	1	356582	862376	506874	430284	18.7817	148	0		666669	660141	909910	778983	840161	533497	731560	18.7817	148	0		6129	1	982999	730569	1179760	579892	18.7817
20.5008	646116	1874567	490403	879256	282931	1065460	352702	877331	808596		104672	1	294943	427708	886005	342666	20.5008	73	0		19307	1	503807	607573	1	254285	230829	20.5008	73	-577767		870921	696625	129579	1369271	130070	867476	677324	20.5008	73	0		1	1	804471	1	518513	264597	20.5008
19.5558	257913	469691	591537	676402	3050314	281386	197452	542704	758425		211585	529492	357900	375058	185408	331889	19.5558	73	0		479077	2744	403808	2067435	1046957	1124187	854035	19.5558	73	0		548455	552265	2336654	509597	514942	611693	845601	19.5558	73	0		7724	475955	459785	1005347	369581	463678	19.5558
38.0333	2106883	33743	1965022	12494	1	1209973	144195	493979	745786		1239	709329	4047968	3288202	400615	1.68947e+06	38.0333	73	0		6105	1	119369	1	539453	731886	232802	38.0333	73	0		822774	1194572	742165	814607	23602	6063	600630	38.0333	73	0		2432	22565	134197	1624592	24078	361573	38.0333
14.1125	380842	1	695393	777729	975340	1048352	787124	518318	647887		1014373	993825	537606	326516	364813	647427	14.1125	75	0		1	1	538889	864621	538808	267626	368324	14.1125	75	0		1	858630	1305352	581243	994535	280593	670059	14.1125	75	0		1	1	921269	1207985	1	425851	14.1125
22.4725	1	899821	885121	1136163	1014266	1	1218504	880415	754286		1	1074201	845582	1	895190	562995	22.4725	188	0		870880	1	971254	1	1073918	1	486009	22.4725	188	0		903983	1	1	994281	1050216	1	491414	22.4725	188	0		350	1	1044890	1349907	1389082	756846	22.4725
12.685	1	388262	522530	736331	13229	915170	888987	453684	489774		1620920	723124	400689	382633	1	625473	12.685	74	0		544443	1447523	425724	748742	753809	326254	707749	12.685	74	0		404957	702596	100345	598631	695951	359066	476924	12.685	74	0		38604	1159889	786510	902166	1	577434	12.685
22.1658	541311	1	1	947323	958165	1335145	1209395	783097	721805		1	1025085	503725	624054	794099	589393	22.1658	74	0		801462	1	666244	1	1	297464	294196	22.1658	74	0		761836	1	1	814834	957423	405507	489934	22.1658	74	0		1720	1628011	1	1	1393756	604698	22.1658
22.2442	1	701587	835329	1	577470	1293797	1	1	426023		3166907	1	414877	394503	1	795258	22.2442	86	0		779392	1	495459	987463	1016062	1	546396	22.2442	86	0		1	922910	1104497	1	1	1	337902	22.2442	86	0		1486	1	1013994	1466884	1	496473	22.2442
22.2725	453704	453169	549209	741821	593900	885015	940569	555372	646595		2026197	626094	448351	422149	1	704558	22.2725	225	0		536859	1	513135	749072	694034	1	415517	22.2725	225	0		477463	738175	1	629820	607584	425112	479692	22.2725	225	0		595	1214390	829841	984636	1022137	810320	22.2725
18.135	957615	1	1182595	1622468	1	1	627407	1273481	707946		1	1349297	1107796	1050674	1266953	954944	18.135	100	0		1241709	1	1	1	1548548	818120	601397	18.135	100	0		1239550	437519	1	1236919	1	1	485665	18.135	100	0		1	1	1307772	1	1	261555	18.135
8.86417	2765251	518768	1	830131	585779	799892	1	772817	784080		1	765135	594271	668495	648826	535346	8.86417	73	0		1092927	1	787763	765694	877678	1	587344	8.86417	73	0		1	140886	30218	1	1	806463	162928	8.86417	73	0		1	1	68089	1010944	118974	239602	8.86417
19.4425	1	1	1	187695	1987680	227508	131029	187161	340134		78994	1	1719666	1003852	141209	588744	19.4425	100	0		1310199	1	1	2858133	1	817860	831032	19.4425	100	0		156766	1	1667127	1	1	130741	325773	19.4425	100	0		1	3768918	180351	4087524	110335	1.62943e+06	19.4425
21.9617	1	1	986367	748050	387420	743023	413626	1227955	563305		143041	1	1	1	1	28609	21.9617	73	-534696		3368145	1	1617232	641699	457282	1	1014060	21.9617	73	0		1740706	1289735	523687	1	1005541	1	759945	21.9617	73	0		27874	239285	2516567	1	836163	723978	21.9617
22.3467	893474	1	1	1327059	1	1602934	1	956064	597442		1	1	975725	916258	1	378397	22.3467	100	0		1	1	1074376	1358972	1309087	1	623740	22.3467	100	0		1	1358136	1421496	1	1221651	1	666881	22.3467	100	0		1	2080208	1	1	1	416042	22.3467
17.4392	1660891	1	1	1	2475194	1	1	1	517011		1	2084745	1	1611882	1906413	1.12061e+06	17.4392	147	0		1	1	1	1	918424	1215430	355643	17.4392	147	0		1578608	1	1	1323179	1	1635328	756186	17.4392	147	0		1	1278745	1	1509761	1	557702	17.4392
10.46	657944	719972	735144	913390	851897	36042	1081488	748095	717996		1	930774	663646	702064	768363	612970	10.46	74	0		794148	87485	841444	890578	871289	629055	685666	10.46	74	0		751807	881691	1	820876	1	1	409063	10.46	74	0		34391	1300041	893202	1	1166833	678894	10.46
26.3067	412346	465436	455013	611101	638330	966707	861672	457471	608510		700928	723443	397305	382114	566968	554152	26.3067	133	0		97972	31545	565083	735917	545132	343378	386504	26.3067	133	0		568798	715456	796222	536028	586962	390761	599038	26.3067	133	0		467	103415	731511	1018223	561612	483046	26.3067
15.9275	1	998606	1	1188966	1	1	847315	925385	495034		1	1	711160	1138884	1699243	709858	15.9275	73	0		1551558	565565	1	1	331674	1	408133	15.9275	73	0		1	1020167	576490	1	1	1164885	460258	15.9275	73	0		525366	843972	998838	1	766316	626899	15.9275
18.1817	1583917	1752470	1	2268286	1	1	1	1827726	929050		35536	1	1689923	1579394	1822223	1.02542e+06	18.1817	254	0		1751668	1	1954136	1	1	1	617635	18.1817	254	0		1	1	1	1	1	1602006	267002	18.1817	254	0		1	1	1	1	1	1	18.1817
14.025	355365	614643	646751	813887	1	1065759	653403	606421	594529		330693	807964	514171	495179	637161	557034	14.025	75	0		634010	807024	675571	656287	734109	473254	663376	14.025	75	0		639927	1	640361	638330	779017	1	449606	14.025	75	0		437747	1112904	1	153291	1081504	557089	14.025
26.6717	1	1	1	517536	929590	844004	906935	1	399759		1	1	1	1	1	1	26.6717	73	0		102315	1674	1	1	1	1	17332.2	26.6717	73	0		1	1420259	1	1	744585	1	360808	26.6717	73	0		5670	78668	1428935	1	597032	422061	26.6717
18.09	1148789	1471222	1459962	1	1827133	909315	1	1	852053		1	1	1	1	1661015	332204	18.09	102	0		1	1	1	995830	1	971411	327874	18.09	102	0		1	538834	280902	1	1	1241142	343480	18.09	102	0		1	436458	1	1470655	1724670	726357	18.09
14.7683	271497	356405	523004	668934	607037	838811	837550	468762	571500		716077	633560	420233	321749	449926	508309	14.7683	75	0		510520	171519	532661	494908	621834	325513	442826	14.7683	75	0		368444	596981	828452	518801	641700	1	492396	14.7683	75	0		67239	969705	693687	876337	864741	694342	14.7683
22.2683	1	753729	863143	1	638702	1	1118726	1	421788		3352463	1	1	1	1	670493	22.2683	74	0		1	561	526150	1045466	1047663	1	436640	22.2683	74	0		1	968063	1151038	1	670215	1	464886	22.2683	74	0		5766	1	1052672	1527729	1	517234	22.2683
17.4342	1121279	1	1	1	1786537	1	1	1	363478		1	1635868	1219644	1130647	1403148	1.07786e+06	17.4342	100	0		1	1	1397791	1	706925	825127	488308	17.4342	100	0		1233057	1	1	1039422	1859114	1200974	888762	17.4342	100	0		1	907081	1	1180917	1	417600	17.4342
12.6392	796500	1023367	1	1	69651	1	1	1091539	372633		1	1719551	905566	828518	1038428	898413	12.6392	75	0		1	1	888214	1	1676415	760809	554240	12.6392	75	0		916598	1	71349	1	1	1	164658	12.6392	75	0		63453	2687583	1	1	2240007	998209	12.6392
17.4733	1	492204	592751	736113	459871	930730	839360	576698	578466		840939	726101	1	1	353942	384197	17.4733	74	0		558618	216899	534265	748044	356426	272874	447854	17.4733	74	0		516517	696998	611234	448175	750903	1	503971	17.4733	74	0		562	485710	687528	577884	1010699	552477	17.4733
21.9867	1466767	1687297	1	1	1	1	1	1	394259		1	1431243	1814496	2397792	1249483	1378603	21.9867	73	0		1	1	1	1	1	1819895	303317	21.9867	73	0		1	1	1	2344561	1	2154063	749771	21.9867	73	0		1	1	1	900893	1	180179	21.9867
10.4558	980790	1048854	1	1376469	1	1	1	1114266	565048		1	1384731	1010117	1027914	1091272	902807	10.4558	117	0		1192429	1	1220875	1	1	1	402218	10.4558	117	0		1139524	1381533	1	1272801	48052	1	640319	10.4558	117	0		9812	1	1412541	1	1	284471	10.4558
26.0025	494885	751671	844812	500342	145819	1040358	714004	825565	664682		348462	1037460	1	516048	1	380394	26.0025	89	0		80752	28001	695824	844655	123315	1	295425	26.0025	89	0		818366	999061	981625	1	718076	471076	664701	26.0025	89	0		2028	41871	1015030	225868	536086	364177	26.0025
18.725	787046	943427	13479	35808	711714	1	1	1	311435		1174589	1409436	28109	36089	1109383	751521	18.725	133	0		2375	1	681000	1	1	1	113896	18.725	133	0		1083051	1175609	1	27719	1410317	803123	749970	18.725	133	0		4532	1917565	1	1321136	7541	650155	18.725
14.8625	1	4119145	1	6482443	1	1	1	1	1.3252e+06		1	1	1	3672957	1	734592	14.8625	73	0		5003460	77091	1	1	1	1	846759	14.8625	73	0		1	1	1	1	1	1	1	14.8625	73	0		22553	1	1	1	1	4511.4	14.8625
22.4742	1	2351439	1	1	1	1	1	2453671	600640		1	1	2366222	2257611	1	924767	22.4742	147	0		1	1	2714370	1	1	1935957	775055	22.4742	147	0		2487188	1	1	1	1	1	414532	22.4742	147	0		1	461815	1	1	1	92363.8	22.4742
19.43	556478	663945	677601	987556	816687	1	680797	696837	634988		1	895938	595303	641191	686929	563872	19.43	157	0		823302	1	895619	732438	535063	679117	610923	19.43	157	0		627135	1021824	536143	763570	622757	1	595238	19.43	157	0		1	668565	853789	700405	587336	562019	19.43
18.1517	1	1	923364	1195787	1148566	1	563607	1	478916		54297	1150233	816922	749882	1	554267	18.1517	74	0		956864	1	1	785933	1182105	511793	572783	18.1517	74	0		820739	1	1	966362	1072629	1	476622	18.1517	74	0		1	1	1173594	1	1312609	497241	18.1517
8.92167	354607	452856	410739	540261	418946	496242	541237	481732	462078		1122481	478669	441374	438399	459056	587996	8.92167	207	0		868831	3269509	545762	553054	604001	246417	1.0146e+06	8.92167	207	0		425740	1	1475	504521	441306	519211	315376	8.92167	207	0		1	1	1529	656097	1	131526	8.92167
17.4433	478644	505453	606899	672507	700658	713809	629006	524333	603914		516816	515791	538751	480390	579820	526314	17.4433	175	0		456630	123907	594210	719560	232699	433362	426728	17.4433	175	0		391925	718355	428263	339863	709675	484505	512098	17.4433	175	0		1	279858	517515	371627	820423	397885	17.4433
22.4192	1	1193101	1307182	1664432	1504546	1	1	1	708658		1	1609754	1	1107453	1295631	802568	22.4192	174	0		1300468	1	1	1	1600694	1	483528	22.4192	174	0		1	1	1	1486446	1561325	1	507962	22.4192	174	0		1	1	1575869	1	1	315175	22.4192
19.3775	380370	385136	230976	1	2410370	284947	1	1	461475		48872	2462661	1	1	349749	572257	19.3775	100	0		1	1	667993	1	2884985	1	592164	19.3775	100	0		183955	214468	1	1	2673536	563668	605938	19.3775	100	0		247	4784425	1	1	1	956935	19.3775
12.74	448417	413592	444224	593111	7080	615178	769607	461678	469111		859632	547595	417228	404717	408357	527506	12.74	232	0		413857	726468	465447	558491	604097	326927	515881	12.74	232	0		449657	620637	46243	501989	489613	383387	415254	12.74	232	0		13546	968020	647681	506232	806739	588444	12.74
21.4033	360749	409301	637337	928762	534568	1199004	861313	730747	707723		1	764838	412043	345176	528305	410073	21.4033	74	0		652452	1	433281	833131	667428	1	431049	21.4033	74	0		1	771663	930836	498027	1	359404	426655	21.4033	74	0		314	794926	756595	521090	725498	559685	21.4033
26.295	312716	460156	346491	596303	641056	909775	820428	350833	554720		740968	674107	310756	279735	516986	504510	26.295	89	0		92379	34065	477237	692786	555407	230858	347122	26.295	89	0		536281	638936	520268	392629	587256	294442	494969	26.295	89	0		1	100794	635103	948196	557226	448264	26.295
18.0908	965736	1169964	1149583	1	1444331	805611	1	1	691904		1	1	1	1	1325434	265088	18.0908	100	0		1	1	1232916	850962	1	1	347314	18.0908	100	0		1	507246	250392	1	1360802	971235	514946	18.0908	100	0		2451	387042	1	1248889	1441602	615997	18.0908
14.0975	325080	1	592481	691962	1	964733	632538	479237	460754		779432	833918	463359	352167	436783	573132	14.0975	74	0		455987	1	1	859626	602936	301595	370024	14.0975	74	0		404366	760390	1040303	559540	851440	259033	645845	14.0975	74	0		1976	1	1	946017	1	189599	14.0975
18.065	1	1272821	1	1359232	1	1	1	750206	422783		1	1	969910	1288192	1	451621	18.065	147	0		1756389	1589	1	1	984550	1468640	701862	18.065	147	0		1	1	1	1	1	1814117	302354	18.065	147	0		1	1	1	1	507611	101523	18.065
26.2333	1750550	1	2281259	1	1	1	1	2114931	768343		1	1	1899012	1594293	1	698662	26.2333	147	0		1	1	1	1	1	1241040	206841	26.2333	147	0		1	1	2934415	2419266	1	1	892281	26.2333	147	0		17788	1	1	1	1	3558.4	26.2333
22.4417	993914	1058494	1166813	1520828	1348377	1	1	1	761054		1	1450069	1	981598	1177410	721816	22.4417	100	0		1173497	1	1193857	1	1432974	1	633388	22.4417	100	0		1	1	1	1347739	1388324	1	456011	22.4417	100	0		4731	1	1	1	1	947	22.4417
20.9258	889167	763991	753105	349091	231222	408382	155154	334997	485639		27723	160132	1205407	641290	611711	529253	20.9258	147	0		570752	2268	1294437	1029079	555313	707757	693268	20.9258	147	0		108448	428972	164612	199990	1419348	869123	531749	20.9258	147	0		1	1127439	156249	223660	214454	344361	20.9258
21.3808	1	517012	627127	913453	1	1252220	754680	675727	592528		1	648031	539859	430916	645763	452914	21.3808	100	0		575293	1	547930	719732	558668	1	400271	21.3808	100	0		468269	688803	858755	436420	697230	510158	609939	21.3808	100	0		1	639596	654174	412228	586892	458578	21.3808
22.3508	1	1	823893	1019591	1	1248185	1	1	386459		1	1	749553	728606	821082	459849	22.3508	133	0		1	1	846617	1111472	1028411	548654	589193	22.3508	133	0		1	1055721	1101806	1	1	679327	472810	22.3508	133	0		1	1645459	1	1	1	329093	22.3508
10.345	706501	800159	853247	1	1	1	1342032	811564	564188		1	1	776614	740875	860925	475683	10.345	75	0		1	1	880693	1	1	687738	261406	10.345	75	0		799326	1	1	78289	1005296	1	313819	10.345	75	0		78305	1	1	1	1	15661.8	10.345
10.975	1252241	596137	446479	1	431009	1	570282	669648	495725		1208044	816516	807039	696913	572124	820127	10.975	73	0		1	1	801895	1270700	949274	605408	604546	10.975	73	0		569281	1	1	758742	1	890384	369735	10.975	73	0		1	1	1	646533	1	129307	10.975
36.1067	1862279	3607914	1111612	1	1	1	4111	1374609	995066		3982	1	1848583	1	1	370514	36.1067	73	0		1	25832	557113	1	1	282713	144277	36.1067	73	0		3694163	2217	865	2210948	873189	1116	1.13042e+06	36.1067	73	0		1	5079	2293	1	2701	2015	36.1067
25.975	552961	553633	703508	404869	125315	745710	564186	666099	539535		296185	865236	643563	502043	667882	594982	25.975	129	0		69749	21210	569866	650785	110015	1	236938	25.975	129	-302597		634374	819380	96028	818076	554508	514552	572820	25.975	129	0		1555	36211	900135	188839	443257	313999	25.975
19.4317	254675	349073	433788	1	1	678251	521092	1	279610		443680	1	939741	722700	364608	494146	19.4317	147	0		754015	560	565579	1625528	1	561710	584566	19.4317	147	0		440037	581633	1	533961	1	341773	316234	19.4317	147	0		1567	2467766	565406	2429851	491371	1.19119e+06	19.4317
9.81083	418915	927143	1	673520	429305	409316	247758	771344	484663		357943	556707	586578	870942	359363	546307	9.81083	73	0		827856	634359	1	795282	806323	196873	543449	9.81083	73	0		1	512035	50113	630228	1	82160	212423	9.81083	73	0		341240	603252	361130	434100	724759	492896	9.81083
22.1508	440629	1	618390	659974	719325	1043748	963008	612505	632198		1	778121	425984	535139	526674	453184	22.1508	75	0		557917	1	523671	1	1	143541	204189	22.1508	75	-428009		591983	3325	1	656427	722249	203662	362941	22.1508	75	0		2576	1271509	1	1	1082538	471325	22.1508
9.44417	1	1	341749	1	180041	541270	554083	1	202143		739059	244450	1	1	951017	386906	9.44417	147	0		1	1523962	273387	370412	328893	1	416109	9.44417	147	0		3827776	44774	163133	3130234	209308	1	1.2292e+06	9.44417	147	0		13921	439825	1	631504	546501	326350	9.44417
12.8383	680589	404939	446577	611071	576561	709093	739592	482153	581322		294411	516501	374652	632709	616508	486956	12.8383	147	0		435159	1	658939	453644	438602	545608	421992	12.8383	147	0		453490	359164	538248	372064	522318	560148	467572	12.8383	147	0		1	363218	245476	678606	447286	346917	12.8383
18.1533	1	1	982505	1293029	1	1	464119	1005559	468152		25745	1117267	883364	843723	1	574020	18.1533	86	0		1024752	1	1	1	1231726	1	376080	18.1533	86	0		959435	1	1	963413	1080620	1	500578	18.1533	86	0		1	1	1092474	1	1200265	458548	18.1533
25.9675	519437	589619	703077	395326	115895	800413	560211	683721	545962		270404	861365	605368	1	1	347428	25.9675	117	0		64918	20572	566723	666555	99920	388083	301128	25.9675	117	0		659276	835061	928090	774805	558769	1353	626226	25.9675	117	0		838	32734	865525	180323	424350	300754	25.9675
18.53	1	1090003	657094	1	1	454169	595439	1	349589		269551	723854	729212	526734	789548	607780	18.53	73	0		876820	131712	1006273	1	1	1377119	565321	18.53	73	0		618884	507170	209146	1	635060	1045141	502567	18.53	73	0		146268	568963	667245	1	860193	448534	18.53
25.965	520759	629181	1	391863	141436	811726	579978	697207	471519		271124	882512	599839	1	1	350695	25.965	103	0		65987	24598	570480	717168	102763	431749	318791	25.965	103	0		671741	844763	935374	762511	570452	1	630807	25.965	103	0		2027	33784	879735	375461	469372	352076	25.965
14.1708	1	1	1	1	1	1	1	1	1		1	1	1	1	1	1	14.1708	73	#DIV/0!		4849993	30585	1	1	1	2938823	1303234	14.1708	73	0		1	1	1	1	1	3995924	665988	14.1708	73	0		1	1	1	1	1	1	14.1708
20.9483	594194	752327	741523	431573	332462	477278	232316	402764	495555		111739	247054	733453	594774	668423	471089	20.9483	75	0		674186	1	809317	1148234	669793	1	550255	20.9483	75	0		182180	544849	260138	243314	1088538	1	386503	20.9483	75	0		1	1249810	173172	340560	315279	415764	20.9483
22.1758	490438	1	1	917122	914317	1	1152133	746878	527611		1	988004	501293	592281	770172	570350	22.1758	86	0		1	1	641145	1	1	344652	164300	22.1758	86	0		727038	1	1	784150	918919	385736	469308	22.1758	86	0		5757	1576833	1	1	1346889	585896	22.1758
14.055	333189	425175	496590	681887	429449	754293	314611	475713	488863		1	627906	524911	420998	490077	412779	14.055	193	0		531344	8451	485350	628600	646902	281428	430346	14.055	193	0		475359	682919	1	553359	602312	290854	434134	14.055	193	0		4228	705085	633831	1	833141	435257	14.055
22.3725	1226851	1	1	1	1	1	2221440	1	431037		1	1	1	1	1369337	273868	22.3725	326	0		1	1	1	1	1	1	1	22.3725	326	0		1368124	1	1	1	1	1	228022	22.3725	326	0		1	1	1	2447426	2381022	965690	22.3725
9.41667	25995	1	288235	1	136718	442286	462841	1	169510		680735	203366	15718	1	823643	344693	9.41667	117	0		1	1436831	219636	282367	243948	1	363797	9.41667	117	0		4213718	37208	24460	3082182	183435	1	1256834	9.41667	117	0		193892	368498	1	565866	466295	318910	9.41667
19.4292	380648	496977	1	1	844406	1010496	630426	1	420370		332985	1	758784	445382	570923	421615	19.4292	74	0		807642	1	1	1148970	1	339620	382706	19.4292	74	0		635693	1	982681	1	857095	413095	481428	19.4292	74	0		1609	1458201	1	1582093	525542	713489	19.4292
8.06667	142403	805425	1	1	962714	1	1	932254	355350		2864194	921403	864207	851287	491863	1.19859e+06	8.06667	75	0		1	1	154660	1	1	1	25777.5	8.06667	75	0		1	32540	1	938817	1	783921	292547	8.06667	75	0		1	1	34084	1336872	186219	311435	8.06667
10.3717	511187	1	1	1	777327	1298278	1	1	323350		2528979	820325	1	1	1	669861	10.3717	74	0		637067	1031741	1	1	1	1	278135	10.3717	74	0		1	847412	9251	670716	844149	1	395255	10.3717	74	0		1	1	765109	1172181	1	387459	10.3717
14.0608	329163	413327	472159	661386	432780	716107	279834	461290	470756		1	615587	511037	413662	480154	404088	14.0608	207	0		502461	74774	473025	604167	625605	292452	428747	14.0608	207	0		466298	654910	1	532538	586628	1	373396	14.0608	207	0		38356	642788	608768	1	812605	420504	14.0608
18.7942	601811	657174	1	1199166	1	1	1462346	916848	604668		6744	1	686283	491552	691677	375251	18.7942	74	0		679993	360540	1	679095	1	419676	356551	18.7942	74	0		1	27747	2286	986013	1	640696	276124	18.7942	74	0		2298	12965	1256425	1	1606778	575693	18.7942
26.5717	769552	163430	765468	180782	283528	392320	343191	738027	454537		200121	712407	804105	601634	534369	570527	26.5717	205	0		30551	8147	329765	295473	189978	624123	246340	26.5717	205	0		293392	750752	1379152	811274	202589	319289	626075	26.5717	205	0		1139	32480	621098	999902	184471	367818	26.5717
14.03	3389670	1	1	1	1	1	1	1	423710		1	1	1	5006295	1	1.00126e+06	14.03	73	0		75796	210991	1	1	1	1	47798.5	14.03	73	0		6259930	1	87770	1	1	1	1.05795e+06	14.03	73	0		94084	161118	1	1	131731	77387	14.03
25.9875	524874	493573	615875	392123	121401	699461	552704	580596	497576		289830	752930	589003	1	1	326353	25.9875	205	0		69111	20451	517953	601196	108778	400776	286378	25.9875	205	0		555215	714702	865986	747025	520312	995	567372	25.9875	205	0		1498	34663	791557	179604	436160	288696	25.9875
9.29833	215948	530710	103299	404933	1	266067	220753	589677	291424		171153	159965	1	186604	1	103545	9.29833	73	0		365529	1680767	219774	169086	217063	316610	494805	9.29833	73	0		1	1	722888	266965	1	1918273	484688	9.29833	73	0		1	380726	1	222636	1	120673	9.29833
18.3617	1	504985	380262	656859	302316	377479	674951	539863	429590		163881	329900	426170	527586	676665	424840	18.3617	100	0		705524	3060	457517	315744	393884	834549	451713	18.3617	100	0		474645	722100	235592	359201	325245	720227	472835	18.3617	100	0		2418	483278	561259	263419	493802	360835	18.3617
14.7883	267992	365981	446918	552999	478459	661874	705157	388474	483482		376560	414336	351117	342395	381364	373154	14.7883	176	0		424076	64339	437003	442146	472951	1	306753	14.7883	176	0		322380	531936	570102	430565	403348	283937	423711	14.7883	176	0		1804	779724	496662	618665	639883	507348	14.7883
18.3558	308555	316271	415522	1	326301	323272	802768	658659	393919		196797	372206	569836	1	1145559	456880	18.3558	70	0		1	4691	291890	284896	210699	1115631	317968	18.3558	70	0		520092	1337046	167609	330769	252890	706719	552521	18.3558	70	0		1	810906	1055662	105315	590310	512439	18.3558
22.3183	1	1	1	1	1	3310296	1	2170267	685071		1	1	1	1	2213315	442664	22.3183	147	0		1	1	1	1	1	1	1	22.3183	147	0		2166058	1	1	2626866	2736451	1	1.2549e+06	22.3183	147	0		1	1	1	1	1	1	22.3183
18.1642	1	625985	653101	901929	713355	1	265453	701859	482710		1	667096	604158	1	769565	408164	18.1642	153	0		710219	1	675431	365487	799589	1	425121	18.1642	153	0		735257	165191	100309	662279	693601	1	392773	18.1642	153	0		1	1	661656	533845	691381	377377	18.1642
22.2675	1	1	1	754361	525062	882762	1	572459	341831		1728999	678410	1	394676	552730	670963	22.2675	327	0		1	1	1	1	679051	1	113176	22.2675	327	0		1	1	1	645144	577102	1	203708	22.2675	327	0		1	1232342	828229	934519	1049579	808934	22.2675
14.995	370070	645988	434732	500475	1317484	100437	165652	921831	557084		129939	625692	313258	340031	220093	325803	14.995	148	0		475081	1	583480	527652	941520	773789	550254	14.995	148	0		40356	602258	204823	172909	161965	200783	230516	14.995	148	0		1	474344	1115199	168900	98507	371390	14.995
21.3067	314254	823462	947484	611191	633610	169395	419910	529985	556161		3039	139314	980530	598540	916335	527552	21.3067	142	0		309655	414	496460	117582	152326	925059	333583	21.3067	142	0		866975	466335	1	242822	839529	578601	499044	21.3067	142	0		1	1	205576	78216	635172	183793	21.3067
11.9783	444751	1022031	1362454	263668	95644	403661	284277	802417	584863		15964	355140	250388	367952	358933	269675	11.9783	73	0		240029	128601	614939	356835	245798	157743	290658	11.9783	73	0		824295	274722	86447	268863	353337	1669289	579492	11.9783	73	0		1	192421	404352	102907	398012	219539	11.9783
10.4725	348700	413168	375257	453144	408842	531853	501221	397946	428766		750399	466116	341730	394888	443848	479396	10.4725	218	0		434225	136511	451547	418189	394434	356227	365189	10.4725	218	0		433505	439209	541	430191	413110	1	286093	10.4725	218	0		4165	499390	441815	448238	560261	390774	10.4725
21.2608	1	890903	1049021	1113277	1	251267	1311234	1	576963		1	295076	577434	1	1	174503	21.2608	74	0		685857	1313	676281	328465	344413	1	339388	21.2608	74	0		965156	1	83610	354243	1127237	1	421708	21.2608	74	0		1164	1	1	278193	1275887	311049	21.2608
18.7017	492377	618406	1	1	504624	1	1	1	201926		805328	1087011	1	1	843914	547251	18.7017	101	0		708166	1	496791	1	1	1	200827	18.7017	101	0		786314	875302	1	1	1052117	512117	537642	18.7017	101	0		1	1466792	1	952250	1	483809	18.7017
18.125	687193	934922	976657	1	1212571	601062	1	1	551551		1	1	1	1	1068966	213794	18.125	86	0		1	1	960497	659264	1169292	1	464843	18.125	86	0		1	368174	184207	981936	1170154	753354	576304	18.125	86	0		6891	1	1	943865	1	190152	18.125
28.6292	5057238	656960	1329916	44290	119763	40833	146453	839321	1.02935e+06		48074	144632	197459	54524	81122	105162	28.6292	73	0		22852	38346	369847	1	192936	1	103997	28.6292	73	0		995881	1246260	1	458882	323032	1	504010	28.6292	73	0		1	186886	307366	460715	30898	197173	28.6292
22.2717	304209	304744	371285	496161	393259	598302	626527	371807	433287		1380194	417582	299930	284075	1	476356	22.2717	238	0		360038	1	343612	501849	466432	1	278656	22.2717	238	0		316690	490147	1	418982	404412	285609	319307	22.2717	238	0		1	819557	558953	661567	688780	545772	22.2717
14.0842	359473	434978	490462	618716	446466	671359	386715	479609	485972		151273	550429	417105	410198	470030	399807	14.0842	314	0		1	1	439896	536921	587703	1	260754	14.0842	314	0		461972	579020	387722	546091	548660	1	420578	14.0842	314	0		1	716725	550768	12159	740277	403986	14.0842
18.645	1	1018163	612603	1257726	1	465874	663107	1	502184		1	790497	1038302	864637	834299	705547	18.645	73	0		1	1	1	779877	896971	1	279475	18.645	73	0		1	405464	571217	910129	505079	1	398648	18.645	73	0		6852	1	483383	1	539128	205873	18.645
10.5375	1	1	1	1	1	1	1	1	1		1	1	1	1	1	1	10.5375	73	#DIV/0!		1	176820	1	1	1	1	29470.8	10.5375	73	0		1	1	8580110	1	1	5324650	2.31746e+06	10.5375	73	0		1	1	1	1	1	1	10.5375
8.06167	144386	665670	1	1	890013	1	1	935090	329395		2409918	899409	817677	844678	1	994337	8.06167	73	0		1	1	1	1	1	1	1	8.06167	73	0		1	66881	1	965783	1	848410	313513	8.06167	73	0		179	1	50851	1198044	102561	270327	8.06167
11.8267	486485	315262	471192	618114	1420926	501851	423143	316906	569235		41112	328522	209050	571441	221677	274360	11.8267	73	0		243977	68914	850938	261434	332645	1686059	573994	11.8267	73	0		363940	409624	87838	58872	243653	464200	271354	11.8267	73	0		1	433020	358757	509769	234013	307112	11.8267
24.8942	495563	557322	912623	189086	799874	341809	108670	881754	535838		138	278989	706630	480921	915563	476448	24.8942	86	0		352990	1	724138	681821	252217	447166	409722	24.8942	86	0		673899	549333	16526	664210	959689	438361	550336	24.8942	86	0		1403	1	214591	1	88919	60983	24.8942
21.295	1072006	1	1314629	1	2216025	1	1	1	575333		1	1	849669	1202871	1	410509	21.295	75	0		1	1	1	1	1	1	1	21.295	75	0		1256251	1	1	1	1572188	774376	600470	21.295	75	0		1	1	1	1	1	1	21.295
19.3808	275007	353206	1	1	1223045	1	1	1	231408		1	1358239	1	578998	382465	463941	19.3808	147	0		1	7545	631355	1	1669566	1	384745	19.3808	147	0		417619	1	992381	1	1573946	412770	566120	19.3808	147	0		1	2948343	1	1	1	589669	19.3808
14.0542	270597	352765	401369	551900	374674	612809	258784	386197	401137		1	511067	426212	342353	397776	335482	14.0542	191	0		434490	95609	397087	518062	526799	237121	368195	14.0542	191	0		387276	554987	1	451101	490411	239117	353816	14.0542	191	0		47962	578916	520324	1	676969	364834	14.0542
14.7033	1	224854	296937	409132	363689	1	1	412072	213336		1371841	638716	479380	184091	727893	680384	14.7033	73	467048		472397	437940	332154	680972	682386	1	434308	14.7033	73	0		191983	412678	825900	598241	437668	1	411078	14.7033	73	0		21886	411401	1	306533	405553	229075	14.7033
10.6125	1	1	1	1	1	1	1	1	1		1	1	1	152664	79075	46348.4	10.6125	73	0		1	1	1	1	1	1	1	10.6125	73	#DIV/0!		1	1	2488847	1	1	6958943	1.57463e+06	10.6125	73	0		1	251169	1	1	1	50234.6	10.6125
18.7967	376250	417908	481592	560065	194473	690562	739349	377112	479664		290744	484400	278554	266137	438917	351750	18.7967	191	0		444008	80493	1	171443	532090	306065	255683	18.7967	191	0		416028	368091	536798	494963	517915	379420	452202	18.7967	191	0		1599	1	650895	374337	723113	349989	18.7967
21.8108	121035	334618	253560	856082	148030	156048	330417	511884	338959		34213	253910	316886	462687	471045	307748	21.8108	174	0		1582534	1	183099	98897	193835	1744852	633870	21.8108	174	0		441993	722561	79173	226649	149465	271686	315254	21.8108	174	0		1	538425	483794	165651	296048	296784	21.8108
20.8992	584804	645553	618399	300944	131801	331470	157457	321653	386510		35799	158527	642047	455334	531609	364663	20.8992	74	0		544434	914	718242	890026	516990	323368	498996	20.8992	74	0		99699	391896	154827	174333	938473	553472	385450	20.8992	74	0		1	946830	139409	201744	193298	296256	20.8992
11.95	339748	1749771	2123061	104016	1	480491	1	1377150	771780		1	113825	52634	49729	144147	72067.2	11.95	241	0		159342	1	95048	213797	1	1	78031.7	11.95	241	0		1652343	1	1	306657	91167	1689694	623310	11.95	241	0		1	1	258356	1	272092	106090	11.95
10.475	431655	481378	487647	606610	565225	1	741795	497910	476528		1	619674	440300	474935	515835	410149	10.475	100	0		539862	1	556226	618935	597773	426668	456578	10.475	100	0		527065	597217	1	543473	1	1	277960	10.475	100	0		15393	1	603542	1	786035	280994	10.475
22.3775	1	484252	554519	671457	627949	766521	809419	1	489265		1	658730	488412	453138	525778	425212	22.3775	225	0		531621	1	524238	1	646598	1	283743	22.3775	225	0		1	1	1	1	630583	440097	178447	22.3775	225	0		1	1	692628	903417	906820	500573	22.3775
22.2392	1	530763	1	1	314033	1	1	1	105600		2665299	1	299627	1	1	592986	22.2392	75	0		1	1	288101	804105	727686	1	303316	22.2392	75	0		1	736557	915709	1	1	84348	289436	22.2392	75	0		18167	1	812443	1144729	1	395068	22.2392
10.7142	182434	193742	208387	254324	240084	296264	306115	212756	236763		771378	259327	197517	200802	211995	328204	10.7142	78	0		192070	2440145	236695	255534	249593	185965	593334	10.7142	78	0		212509	249379	15563	238164	248184	20064	163977	10.7142	78	0		1906789	361959	225756	330877	329288	630934	10.7142
18.2083	1	1556003	1	2122278	1	1	1	1640235	664815		38708	1	1350965	1	1	277935	18.2083	115	0		1	458	1522787	1	1	1244718	461328	18.2083	115	0		1682947	1	1	1	1	1	280492	18.2083	115	0		197	1	1	1	1	40.2	18.2083
14.0458	287109	422358	384871	497888	1	672155	411872	332710	376120		89931	496239	361306	424746	352489	344942	14.0458	147	0		407480	2202880	474166	1	498611	268586	641954	14.0458	147	0		372791	1	1	452191	402825	216997	240801	14.0458	147	0		1113538	1	1	62347	638542	362886	14.0458
24.9292	430434	542979	862924	214043	1038735	375690	122863	827078	551843		6165	326508	688386	430388	1	290290	24.9292	74	0		426012	1	688632	957922	306586	1	396526	24.9292	74	0		693404	601943	1	715311	958437	422568	565277	24.9292	74	0		1	1	253222	1	1	50645.2	24.9292
15.9783	375861	331562	234842	388865	974893	410911	499106	366842	447860		104775	357850	295294	412076	656508	365301	15.9783	74	0		700909	9096	550100	572220	142084	483569	409663	15.9783	74	0		247515	412122	1006988	380650	275559	328968	441967	15.9783	74	0		791	254778	307641	412538	287287	252607	15.9783
18.8	364434	428334	592302	728045	1	931973	882415	533354	557607		1	1	401269	333256	443087	235523	18.8	117	0		503085	140107	1	292395	721265	350683	334589	18.8	117	0		430663	1	770876	590056	1	392035	363939	18.8	117	0		1	1	794470	1	969390	352773	18.8
11.1625	176412	218188	199835	178691	274794	340102	337509	182463	238499		867066	222717	180792	181595	214572	333348	11.1625	149	0		164967	2678299	219912	285008	235051	193000	629373	11.1625	149	0		235847	190918	3445	219500	248569	1	149713	11.1625	149	0		2075724	291502	173605	304270	267599	622540	11.1625
8.8675	98747	83445	85945	82130	84021	83648	123434	107112	93560.2		229531	169586	165785	142587	141374	169773	8.8675	152	76212.4		201576	125043	127567	180108	196381	225311	175998	8.8675	152	82437.4		162482	2052801	2254064	161709	108290	174376	818954	8.8675	152	0		1513783	133715	1456327	128272	1680348	982489	8.8675
21.5283	339926	496655	305844	572536	444376	390255	230510	436159	402033		57903	329055	209443	348754	279446	244920	21.5283	73	-157112		372981	261274	280041	590905	470207	804503	463318	21.5283	73	0		356853	425584	210294	273107	315475	704215	380921	21.5283	73	0		168576	531944	293251	1	426088	283972	21.5283
11.0142	1	1	1	517335	1	662533	1	1	147484		1	1	1	1	1	1	11.0142	73	0		1033345	1752248	1	1	1	1	464266	11.0142	73	0		1	568305	4166661	1	723695	1	909777	11.0142	73	0		695757	738279	308728	1	773022	503157	11.0142
18.21	1	1424290	1	2106780	1	1	1	1582481	639194		43923	1	1280025	1	1	264790	18.21	102	0		1	1	1486148	1	1	1155405	440260	18.21	102	0		1628845	1	1	1	1	1	271475	18.21	102	0		1	1	1	1	1	1	18.21
26.59	412192	171474	636601	209957	324017	392869	361798	656700	395701		211157	763211	484772	495574	601563	511255	26.59	75	0		31706	10977	385238	310766	195200	1	155648	26.59	75	-240053		309499	775073	649226	1	195930	294356	370681	26.59	75	0		8326	31544	640902	998114	209287	377635	26.59
10.3958	318188	394418	415948	1	505618	728238	609162	1	371447		1355660	1	352350	369001	1	415403	10.3958	148	0		1	360611	1	513123	496010	314717	280744	10.3958	148	0		391873	1	10280	1	488795	1	148492	10.3958	148	0		2954	728554	1	639377	731029	420383	10.3958
26.2917	395627	202197	428433	261143	306086	482531	432869	417380	365783		324755	488041	395671	352558	368324	385870	26.2917	320	0		41846	12058	307053	367576	261193	300354	215013	26.2917	320	-150770		291680	506450	602794	477026	273652	263207	402468	26.2917	320	0		1526	47917	488138	687416	263712	297742	26.2917
19.5767	1	1	1	1	1	1	1	1	1		1	1	1	4323022	1	864605	19.5767	156	0		1	1	1	1	3825812	4488426	1385707	19.5767	156	0		1	1	94876	1	1	1	15813.5	19.5767	156	0		1	1	1	1	1	1	19.5767
12.6642	186646	229420	276160	402248	6108	506975	511026	257080	296958		734200	395208	231497	222499	231927	363066	12.6642	94	0		298043	609215	235008	426743	402411	182204	358937	12.6642	94	0		248390	397825	38878	315183	385166	215633	266846	12.6642	94	0		12768	646079	413784	439418	533597	409129	12.6642
8.79417	111462	280583	314361	302481	286448	370902	464644	347544	309803		938664	588956	463833	375767	409556	555355	8.79417	74	245552		489805	485498	425729	564741	621196	1	431162	8.79417	74	0		482689	1	13309	579056	416908	372858	310804	8.79417	74	0		1	1	85698	488702	98882	134657	8.79417
22.77	1133670	923532	1	1	445851	433257	238088	773891	493536		146334	1	1	1	1	29267.6	22.77	73	-464269		712580	6429	1	530226	835172	810786	482532	22.77	73	0		1	1	1	1	546137	1078503	270774	22.77	73	0		1	423277	74665	639821	386201	304793	22.77
10.6858	157267	157182	161950	223609	202761	266735	269557	178029	202136		685370	214157	153628	151708	174811	275935	10.6858	69	0		177219	2600559	181342	225757	216593	151933	592234	10.6858	69	0		179616	226266	5285	200291	215037	18605	140850	10.6858	69	0		1874945	336677	228682	289885	282187	602475	10.6858
21.3783	331101	379652	356508	552955	480632	787066	465083	391380	468047		50080	408320	314111	322105	383017	295527	21.3783	133	0		349931	1	416985	458976	349992	1	262648	21.3783	133	0		253782	426589	563258	269202	414061	329922	376136	21.3783	133	0		3789	424455	409565	263124	367860	293759	21.3783
14.0483	197663	310396	343015	460364	368964	569744	278388	329749	357285		120976	447424	304149	257538	327801	291578	14.0483	115	0		358861	110378	338328	460347	445394	185562	316478	14.0483	115	0		328718	456774	279791	378694	428605	176982	341594	14.0483	115	0		56632	571816	467954	28278	585824	342101	14.0483
14.1067	306461	84010	388241	348125	815902	430146	380507	314093	383436		475362	474925	328397	183353	166169	325641	14.1067	148	0		1	1957	220560	502114	150444	76690	158628	14.1067	148	0		136505	361408	983095	370745	499024	1	391796	14.1067	148	0		1	504549	504400	677481	473216	431929	14.1067
22.3417	1	1	1	642916	1	781734	1	472576	237154		1	1	477408	450522	1	185587	22.3417	86	0		525582	1	533727	676807	648859	1	397496	22.3417	86	0		470706	663666	1	571221	639589	413947	459855	22.3417	86	0		7119	1014752	1	918698	1	388114	22.3417
21.0817	944498	1	1	1	1	1	1	1	118063		1	1	5168682	1	1	1.03374e+06	21.0817	73	0		1	1	1	1	1	3389181	564864	21.0817	73	0		1	1	265583	1	1	1	44264.7	21.0817	73	0		1	493981	333399	1	1	165477	21.0817
14.7875	181614	248948	347582	427132	390536	520294	519743	290474	365790		309864	342399	282674	224466	263876	284656	14.7875	148	0		295189	62221	347329	353934	384724	1	240566	14.7875	148	0		247449	410832	470829	351574	342304	200174	337194	14.7875	148	0		17660	634207	408384	513653	526497	420080	14.7875
14.3158	1	1	1	831489	456657	522910	459197	1	283782		1	585677	412144	1	704517	340468	14.3158	73	0		1	323885	495388	457350	955616	577282	468254	14.3158	73	0		1	680609	318282	721734	626488	1	391186	14.3158	73	0		31227	656912	543853	1	637087	373816	14.3158
20.5042	488526	601743	550645	341074	217081	335500	152056	355172	380225		276757	301894	358677	483620	253873	334964	20.5042	174	0		574048	1	531525	658494	599026	78250	406891	20.5042	174	0		385655	230488	133953	465886	479787	486949	363786	20.5042	174	0		1	149194	206102	232506	389178	195396	20.5042
25.9717	379481	402848	496528	284804	82252	549902	399557	477220	384074		199327	611121	438493	1	1	249789	25.9717	131	0		47468	13792	404782	466745	73117	286839	215457	25.9717	131	0		457480	584998	649295	558196	396839	1	441135	25.9717	131	0		1404	24264	622474	122911	309730	216157	25.9717
18.1092	711610	741025	1	1	1	812398	1	1	283130		27716	1	1	763192	1076252	373432	18.1092	75	0		938701	1	1006677	1	513645	1	409838	18.1092	75	0		1010125	1	1	1	1	789872	300000	18.1092	75	0		1	909082	1	1	1	181817	18.1092
15.1067	1	218749	269255	330265	384949	381355	297212	1	235223		423057	521451	447343	1	442763	366923	15.1067	73	0		407810	302841	160394	402693	721413	1	332525	15.1067	73	0		256037	447360	303519	456488	338811	515791	386334	15.1067	73	0		146836	528270	380368	239510	469573	352911	15.1067
18.3458	613614	1	372294	714454	289588	422485	744409	539057	461988		190867	353450	379884	1	534184	291677	18.3458	75	0		672221	30706	1	199150	1	1	150347	18.3458	75	-311641		488907	674708	281811	342948	367879	1	359376	18.3458	75	0		82687	1	559280	365599	569963	315506	18.3458
11.6108	156163	424746	371836	436367	105170	580765	166869	197525	304930		159378	538825	304811	374030	442820	363973	11.6108	75	0		511049	137381	397972	119472	186275	395945	291349	11.6108	75	0		401403	556913	1	392323	513232	340468	367390	11.6108	75	0		1	452679	570218	160459	794668	395605	11.6108
15.47	244799	272622	276719	292718	174263	125536	439273	412246	279772		63113	316953	372961	424418	1	235489	15.47	73	0		353655	117702	371168	678096	87933	950393	426491	15.47	73	0		1	472742	1510517	128062	349096	252896	452219	15.47	73	0		126592	317116	378063	387019	402441	322246	15.47
14.7808	144855	200192	307955	390804	368145	488092	481047	287882	333622		316340	356638	265461	182786	238849	272015	14.7808	87	0		248378	62404	309644	378338	396883	137437	255514	14.7808	87	0		197114	361834	449584	325747	347346	171931	308926	14.7808	87	0		11198	599406	408683	511386	509169	407968	14.7808
18.0533	1	782337	1	783474	1	1	1	437255	250384		1	1	531911	987757	315681	367070	18.0533	254	0		1060656	1	295952	1	596405	945755	483128	18.0533	254	0		1	1	1	1	1	1107946	184658	18.0533	254	0		1	1	1	1	253459	50692.6	18.0533
8.79917	81400	297134	310957	315781	244021	351403	349860	318125	283585		831208	456011	333764	321683	340084	456550	8.79917	75	0		395974	375307	403230	380704	423779	224455	367242	8.79917	75	0		384516	87869	79827	407977	369268	257664	264520	8.79917	75	0		341392	91659	117400	411695	138198	220069	8.79917
19.8225	1	67	45064	942	1	1	1	6383	6557.5		1	72	642	567	13	259	19.8225	263	0		1	25300	1	8634	6897	302	6855.83	19.8225	263	0		1	1	1	6472	15	1	1081.83	19.8225	263	0		11372405	1	10159	861	6726	2.27803e+06	19.8225
12.3733	146760	352022	295124	305025	196767	84112	1	435565	226922		72469	382890	575937	646711	728771	481356	12.3733	147	254434		798285	1	488437	164194	208261	1125172	464058	12.3733	147	0		498768	379685	150783	327196	142516	673082	362005	12.3733	147	0		172342	175185	321002	64099	147446	176015	12.3733
18.1175	1	871978	936150	1	1	646944	1	932414	423436		1	1	1	1	965927	193186	18.1175	74	0		1	415	898228	1	1	1	149774	18.1175	74	0		878827	563681	207683	1	1126549	1	462790	18.1175	74	0		1	448870	1	1060437	1	301862	18.1175
17.4383	890687	1	1	1	1268511	1	1	1	269900		1	1151162	1	838014	999325	597701	17.4383	133	0		1	1	1	1	535208	665378	200098	17.4383	133	0		868756	1	1	752173	1	873641	415762	17.4383	133	0		1	673222	1	860907	1	306826	17.4383
21.2858	286703	705150	902210	693453	594933	202522	1	545892	491358		8719	1	788717	499839	827043	424864	21.2858	70	0		1	1	455308	1	1	400314	142604	21.2858	70	-348754		832545	1	1	296216	819538	483725	405338	21.2858	70	0		1	1	287926	71797	1	71945.2	21.2858
10.3442	1	588441	654989	1	1	1	1016378	1	282477		1	1	598665	556380	629997	357009	10.3442	74	0		1	1142	1	1	1	501991	83856.2	10.3442	74	0		569132	1	1	1	771941	1	223513	10.3442	74	0		2529	1	1	1	1	506.6	10.3442
18.2525	1768807	1	1	1	1	1	212227	1	247630		1	1	1	1757669	1	351535	18.2525	254	0		1926001	1	1	1	1	1672124	599688	18.2525	254	0		1	122548	1	1	1	1765169	314620	18.2525	254	0		1	111332	1	1	1	22267.2	18.2525
22.34	531639	1	1	1	1	934286	1	1	183241		1	1	1	555268	1	111054	22.34	130	0		1	1	645204	814939	1	1	243358	22.34	130	0		1	790115	802464	1	722419	513336	471389	22.34	130	0		1	1219285	845085	1	1	412875	22.34
18.1067	255042	1	463340	533815	559424	1	307538	1	264895		35039	582086	367220	353805	1	267630	18.1067	61	0		450732	1782	1	447293	608047	188140	282666	18.1067	61	0		1	339075	121823	450094	571262	1	247043	18.1067	61	0		1170	260642	571928	548904	722936	421116	18.1067
22.3475	668008	1	1	1	1	1130739	1	1	224844		1	1	1	1	1	1	22.3475	188	0		1	1	1	997309	1	1	166219	22.3475	188	0		1	987160	1005049	1	1	1	332036	22.3475	188	0		1	1516423	1	1303298	1	563945	22.3475
15.925	293915	385648	192478	510026	1	130693	264263	346795	265477		1	1	303158	552108	775096	326073	15.925	100	0		666032	38320	1	1	1	2089362	465620	15.925	100	0		255559	452546	126760	199398	1	483161	252904	15.925	100	0		1	269841	451451	1	229314	190122	15.925
21.2925	91987	487825	769613	663616	372978	78589	812246	75797	419081		14137	108425	554960	197011	386198	252146	21.2925	117	0		315329	1375	279265	111463	126109	418246	208631	21.2925	117	0		689317	78502	38616	142454	826218	284385	343249	21.2925	117	0		1165	22378	34408	113180	647299	163686	21.2925
22.3283	441321	1	531726	658837	1	1	1	490728	265327		1	632231	1	1	511903	228827	22.3283	225	0		520378	1	1	692129	633964	1	307746	22.3283	225	0		1	675356	814973	1	609884	437709	422987	22.3283	225	0		1	1044811	1	897781	1	388519	22.3283
24.9367	470827	543199	821996	161015	687323	296372	1	785891	470828		1	1	1	481841	813548	259078	24.9367	100	0		307438	1	666989	587037	217012	1	296413	24.9367	100	0		653897	466830	20529	583244	832688	457484	502445	24.9367	100	0		1	1	190212	1	7960	39635	24.9367
24.86	339582	382173	597613	233404	1064609	324920	125267	598881	458306		16058	1	527871	334202	1	175627	24.86	75	0		1	1498	562695	1	300967	271477	189440	24.86	75	0		541711	536713	718789	641221	743361	312062	582310	24.86	75	0		1	1	272169	1	83306	71095.6	24.86
26.5917	1	148223	654883	167579	254035	340675	302508	656969	315609		178387	647814	1	488371	516079	366130	26.5917	74	0		26378	9048	297903	256786	162646	1	125460	26.5917	74	0		269097	724892	1	672522	168570	282421	352917	26.5917	74	0		1283	28697	584365	864790	159574	327742	26.5917
22.4733	1	1	1	1	1	1	1	1433814	179228		1	1	1360070	1268834	1	525781	22.4733	326	0		1	1	1553320	1	1	1123647	446162	22.4733	326	0		1429900	1	1	1	1	1245925	445972	22.4733	326	0		1	1	1	1	1	1	22.4733
8.705	1	1	7405	187628	1	1	39249	1	29285.9		1	1	1	1	1	1	8.705	147	0		1	1	1	1	1	1	1	8.705	147	0		1	2747668	1	1	1	1	457946	8.705	147	0		1724147	1	2252120	1	2301817	1.25562e+06	8.705
14.0717	274123	310816	358800	460411	308762	505636	283368	1	312740		1	422504	339968	300426	342379	281056	14.0717	301	0		355110	1	334932	406825	444239	1	256851	14.0717	301	0		344077	442833	1	401453	416090	1	267409	14.0717	301	0		1	494522	412838	1	547471	290967	14.0717
20.9158	483060	531700	477501	227881	54616	253730	86670	242741	294737		25555	115530	583061	367409	444753	307262	20.9158	86	0		457036	1	641168	690948	393463	1	363770	20.9158	86	0		56481	307478	121777	126075	857252	413374	313740	20.9158	86	0		1	793523	122880	129010	125613	234205	20.9158
19.2633	1	1	690670	477299	1	1	308180	558141	254287		1	1	825018	1250494	1	415103	19.2633	73	0		647614	65728	1	1492432	1	1	367630	19.2633	73	0		584238	698540	275041	495217	1	1	342173	19.2633	73	0		1	1	436594	1	419151	171150	19.2633
12.8392	354699	331150	292738	368422	423888	443465	464240	306740	373168		209180	281088	206692	336288	415226	289695	12.8392	74	0		212336	16840	403648	245775	237409	389053	250844	12.8392	74	-122324		248485	230898	369008	229924	356576	337964	295476	12.8392	74	295476		4815	164147	194433	465537	234515	212689	12.8392
14.0383	175241	306313	326149	427237	1	549111	287236	314467	298219		124844	422195	260253	251362	308276	273386	14.0383	103	0		329110	1208549	326647	1	421880	203645	414972	14.0383	103	0		320727	1	1	348412	401766	189118	210004	14.0383	103	0		609613	1	1	1	559398	233803	14.0383
14.8867	1	1627449	1	2413560	1	2846999	1	1	861002		1	1	1	1	1	1	14.8867	86	0		1905235	2078	1	12476	1	1	319965	14.8867	86	0		1	1	1	1	1	1536717	256120	14.8867	86	0		1	1	1	1	1	1	14.8867
18.7825	406222	1	582008	703910	1	1	870698	491449	381786		1	1	372431	349374	1	144362	18.7825	149	0		531678	1	1	1	671708	385506	264816	18.7825	149	0		1	1	710017	603316	1	413971	287884	18.7825	149	0		1224	1	761053	1	920527	336561	18.7825
20.925	539781	513254	454425	190933	41337	235220	79939	214813	283713		18843	98433	721655	329817	387705	311291	20.925	114	0		370497	1	771148	656532	354880	1	358843	20.925	114	0		50007	262190	104541	108646	911661	581060	336351	20.925	114	0		1	722218	98042	118453	105356	208814	20.925
22.2967	1	1	597588	763496	1	873208	1	1	279287		1	770604	1	1	544425	263006	22.2967	74	0		548040	1	1	1	754560	1	217101	22.2967	74	0		538429	802298	1	698982	1	1	339952	22.2967	74	0		353	1261700	1020016	1	992429	654900	22.2967
15.4667	245899	145045	298302	46210	133932	54063	350883	305332	197458		187239	299944	381897	608135	9391	297321	15.4667	99	0		245215	1	379637	743081	136989	1063742	428111	15.4667	99	0		4561	374693	1573805	9587	366749	79304	401450	15.4667	99	0		801	245440	360324	450248	226128	256588	15.4667
18.58	1	1	613235	1	1	382799	510662	1	188338		1	725493	1	1	1	145099	18.58	73	0		836752	15536	989406	696606	812920	1	558537	18.58	73	0		1	1	1	1	543150	1	90525.8	18.58	73	0		19406	472885	1	754278	1	249314	18.58
30.0408	187646	156411	266905	28120	18689	38761	118104	66070	110088		223385	342219	283496	144795	65274	211834	30.0408	73	0		17746	1	413800	214860	14952	233331	149115	30.0408	73	0		33479	341869	838924	180106	62356	48442	250863	30.0408	73	0		3121014	9334	364236	81272	229978	761167	30.0408
10.3408	174079	206115	217084	255301	253306	476878	341561	203417	265968		843913	257573	197217	187373	221892	341594	10.3408	61	0		219093	464730	214997	275535	266970	183949	270879	10.3408	61	0		196283	281640	7608	212452	258963	1	159491	10.3408	61	0		767	1	260830	396982	400661	211848	10.3408
26.0642	496363	272130	492765	109612	500596	177437	215553	222994	310931		146260	388132	375113	366046	1	255110	26.0642	73	0		53273	8514	1	394718	156565	807606	236780	26.0642	73	0		266560	322835	1245117	1	178595	1	335518	26.0642	73	0		1	24030	400207	572864	434286	286278	26.0642
10.3733	282817	316929	1	1	1	641086	1	1	155105		1326099	437296	1	299633	338952	480396	10.3733	103	0		348956	552121	1	1	1	274754	195972	10.3733	103	0		1	449931	7666	1	429058	11421	149680	10.3733	103	0		1	680889	1	595727	1	255324	10.3733
22.4425	488162	521756	580333	737981	669629	1	1	1	374733		1	714215	522253	487121	574998	459718	22.4425	86	0		573574	1	596230	1	707401	1	312868	22.4425	86	0		548541	1	1	657387	683210	1	314857	22.4425	86	0		1	1	1	1	1	1	22.4425
8.82167	1	1	1	1	1	1	1	1	1		1	1	1	1	1	1	8.82167	73	#DIV/0!		1	1	1	1	1	2837177	472864	8.82167	73	0		1	1032193	50360	1	1	1	180426	8.82167	73	0		4643011	1214468	1	1	1	1.1715e+06	8.82167
22.9258	1207378	888567	503711	1	135838	1	110600	663168	438658		1	1	1	709237	341621	210172	22.9258	73	0		1	78545	1	1	1	685221	127295	22.9258	73	0		711660	97260	358894	1	432282	883287	413897	22.9258	73	0		153880	1	69551	436852	1	132057	22.9258
12.6408	857195	1126536	1	1	10136	1	1	1272591	408308		1	1	1	888348	1134299	404530	12.6408	66	0		1	1	1	1	1	1	1	12.6408	66	0		945425	1	18623	1	1	1	160675	12.6408	66	0		16172	1	1	1	1	3235.2	12.6408
10.3867	1	1	1	1	539033	821221	1	1	170032		1746912	571838	1	1	444061	552563	10.3867	100	0		459529	1	1	1	1	1	76589	10.3867	100	0		1	592346	1	458110	558319	1	268130	10.3867	100	0		8726	896234	1	781632	1	337319	10.3867
24.955	301342	331665	609512	1	1	1	123964	510065	234569		74684	337542	417128	336454	641955	361553	24.955	75	0		555789	1	449242	1690765	257351	426463	563268	24.955	75	0		426187	1	1	1	1	1	71032	24.955	75	0		1	881784	1	234263	117230	246656	24.955
18.3033	1	1	452998	744073	1	1	1	1	149635		136310	389874	483165	590055	1	319881	18.3033	75	0		663903	2188	474229	237503	1	1	229638	18.3033	75	0		1	1	1	432350	507167	621786	260218	18.3033	75	0		16095	507511	485998	1	543207	310562	18.3033
22.39	1	1	1	1	1	1	1313477	1	164186		1	1	1	754666	1	150934	22.39	133	0		840718	3301	897143	1	1	1	290194	22.39	133	0		1	1	277165	1	1	1	46195	22.39	133	0		1	1	1119090	1469142	1463221	810291	22.39
26.4325	367235	1	1	1	1	1	1	345860	89137.6		1	1	440013	1	7032712	1.49455e+06	26.4325	73	0		41760	1	1	1	1	294063	55971.2	26.4325	73	0		1	1	685339	1	1	1	114224	26.4325	73	0		13068	49798	242439	1	1	61061.4	26.4325
18.77	1	484662	1	1	303687	855021	1	1	205422		460842	643642	1	1	532796	327456	18.77	149	0		1	129509	303115	270058	1	1	117114	18.77	149	0		522277	516432	1	1	654250	408293	350209	18.77	149	0		3207	837457	1	562981	1	280729	18.77
18.0525	1	713447	1	687350	1	1	1	396526	224666		1	1	480187	647991	1	225636	18.0525	115	0		938985	308	1	1	537804	760914	373002	18.0525	115	0		1	1	1	1	1	947723	157955	18.0525	115	0		1	1	1	1	251899	50380.6	18.0525
10.2383	1	1	1	1	1	1	1	1	1		1	1	1	1	1	1	10.2383	73	#DIV/0!		1	140957	1	1	1	1	23493.7	10.2383	73	0		1	1	8985001	1	1	1	1497501	10.2383	73	0		144243	1	134633	1	1	55775.8	10.2383
17.455	230404	243243	289338	320659	344071	339595	304932	251848	290511		263054	247641	271439	243862	290181	263235	17.455	250	0		218697	59867	296441	342120	117869	220083	209180	17.455	250	0		190094	349322	210671	170541	343166	243753	251258	17.455	250	0		1	142138	254223	185550	393190	195020	17.455
22.4267	1	1	1	1	1	682299	679011	372687	216750		1	1	420699	346253	1	153391	22.4267	75	0		1	8951	1	554684	1	1	93939.8	22.4267	75	0		327061	690184	386358	489746	425350	1	386450	22.4267	75	0		2587	1	546827	836466	933945	463965	22.4267
22.4408	233736	1	462759	589101	606261	1	1	570029	307736		1	684695	564344	1	489424	347693	22.4408	75	0		510971	1	396692	1	648224	129760	280942	22.4408	75	0		348184	1	221297	565421	783683	1	319764	22.4408	75	0		1	374986	1	1	1	74998	22.4408
14.0533	184014	227163	263748	364081	251342	419350	188682	257676	269507		1	343216	271480	222024	262971	219938	14.0533	181	0		288403	1164	263856	355282	352137	157506	236391	14.0533	181	0		258675	365782	196430	298205	327355	167172	268936	14.0533	181	0		679	412624	355816	1	457401	245304	14.0533
29.9592	162684	42257	1	12155	14779	1	1	1	28984.9		1	1	198921	1	8738	41532.4	29.9592	73	0		15092	1	297776	1	7047	169901	81636.3	29.9592	73	0		24637	1	528730	130198	46268	1	121639	29.9592	73	0		7517966	4481	1	1	1	1504490	29.9592
12.6892	1	198278	221430	300511	3822	323570	380134	217792	205692		472184	283306	196345	192039	200620	268899	12.6892	157	0		215159	393496	211400	287666	292719	158204	259774	12.6892	157	0		212850	305711	24747	241714	256879	179961	203644	12.6892	157	0		7106	484313	316836	278853	417274	300876	12.6892
10.2375	1	73081	100910	1	1	1	1	1	21749.6		1	1	1	1	1	1	10.2375	116	0		1	1	1	1	1	1	1	10.2375	116	0		1	69138	8681403	1	1	1	1.45842e+06	10.2375	116	0		3468	1	137802	1	1	28254.6	10.2375
12.6925	1	160868	219148	289202	15808	373552	369891	170614	199886		552832	293023	179930	165672	172546	272801	12.6925	131	0		224307	552909	1	306823	283440	150643	253020	12.6925	131	0		173769	305144	56979	252134	294780	1	180468	12.6925	131	0		20847	473837	362921	327428	382095	313426	12.6925
20.4992	342691	789716	171972	362828	102832	458540	121681	341026	336411		83860	52967	134295	157504	444251	174575	20.4992	75	0		197429	1	266739	1	1	25201	81562	20.4992	75	-254849		340304	293398	68002	520747	53162	272033	257941	20.4992	75	0		1	1	317324	49199	187116	110728	20.4992
17.4967	1	305580	363704	425216	1	510767	449806	339757	299354		405324	1	1	1	267319	134529	17.4967	131	0		314121	105110	1	468269	1	178625	177688	17.4967	131	0		1	433659	312572	1	440314	220168	234452	17.4967	131	0		655	1	371977	1	570543	188635	17.4967
9.2175	7017	1	57684	1	1	378666	316691	1	95007.8		1	153571	1	1	1312828	293280	9.2175	73	0		1	55260	654448	204181	84124	1	166336	9.2175	73	0		952644	477143	1	1594922	1	1	504119	9.2175	73	0		1772346	1	504031	41175	484584	560427	9.2175
12.7342	223052	204238	218618	290512	2953	297537	376133	227670	230089		400020	267690	205173	198351	196762	253599	12.7342	233	0		201512	330737	224303	270592	296783	157118	246841	12.7342	233	0		221544	309994	20801	242613	236113	187145	203035	12.7342	233	0		5714	477081	321982	239503	397552	288366	12.7342
14.9942	220785	395042	254953	294177	844414	57714	105256	573015	343170		77086	374041	174774	201425	124717	190409	14.9942	149	0		282564	1	349473	317897	577219	491720	336479	14.9942	149	0		18126	360194	118458	99859	89976	115926	133756	14.9942	149	0		269	274972	685846	97151	56786	223005	14.9942
18.2025	103431	311443	446457	571109	17974	184075	89072	381133	263087		83514	277904	376527	5017	81933	164979	18.2025	146	0		368903	1	306463	472366	305198	61417	252391	18.2025	146	0		265510	518503	85563	415917	441803	148013	312552	18.2025	146	0		1	305976	504789	17993	410217	247795	18.2025
24.37	344594	360170	235333	230347	164228	101821	262206	375934	259329		1	198823	211266	288798	437464	227270	24.37	73	0		344137	185065	291698	203307	308619	285502	269721	24.37	73	0		356352	348852	77564	290898	52934	338030	244105	24.37	73	0		684826	261463	369201	63525	346837	345170	24.37
18.235	582667	638117	1	1049838	1	1	1	823288	386739		35707	1	657273	1	724659	283528	18.235	74	0		745823	811	761734	1	1	536059	340738	18.235	74	0		1	1	1	1	1	546746	91125.2	18.235	74	0		1	1	1	1	1	1	18.235
9.615	363165	1	101660	1	230280	206183	292859	420899	201881		312224	551871	1	542536	555883	392503	9.615	73	0		1	742679	1	822936	635872	1	366915	9.615	73	0		458962	1	1	526969	154629	159388	216658	9.615	73	0		1	419004	1	339898	311025	213986	9.615
18.1383	1	302258	380915	1	381599	264753	242700	346782	239876		43236	462617	1	278793	323574	221644	18.1383	72	0		1	1	301393	388517	434220	180415	217424	18.1383	72	0		340573	334269	111463	400452	458988	1	274291	18.1383	72	0		13023	271887	499715	403870	518962	341491	18.1383
18.7025	355335	432697	1	1	334952	1	1	1	140374		499929	697776	1	1	544812	348504	18.7025	117	0		1	1	315475	1	1	1	52580	18.7025	117	0		530246	552094	1	1	688296	371948	357098	18.7025	117	0		2538	933285	1	610817	1	309328	18.7025
10.4025	229762	258624	278405	1	334888	470215	431110	1	250376		1008465	349183	248203	246915	267317	424017	10.4025	133	0		1	309948	1	1	1	216830	87797	10.4025	133	0		263055	1	3166	1	334631	3481	100722	10.4025	133	0		1	526092	1	458514	490571	295036	10.4025
24.865	4058684	1	1	1	1	1	1	1	507336		1	1	1	1	1	1	24.865	73	0		1	6359	1	1	1	3300644	551168	24.865	73	0		1	1	1	1	1	1	1	24.865	73	0		5181	1	1	420540	885148	262174	24.865
17.5042	1	298394	361481	426520	1	494212	417012	326376	290500		363973	1	1	1	254758	123747	17.5042	148	0		294355	90067	348664	441686	1	185652	226738	17.5042	148	0		1	431777	294326	1	435452	207157	228119	17.5042	148	0		268	1	337176	1	556766	178842	17.5042
12.6917	1	184273	248530	317871	11501	436290	412764	205145	227047		898543	1	197463	184209	171754	290394	12.6917	61	0		252147	904987	197957	362050	1	135142	308714	12.6917	61	0		204111	313735	67286	268712	331279	164217	224890	12.6917	61	0		25109	1	346044	470350	1	168301	12.6917
25.9917	274425	273758	358158	173745	47130	354769	246321	332871	257647		114102	431070	327539	238630	342976	290863	25.9917	146	0		27218	8178	266136	300520	42075	203725	141309	25.9917	146	0		312931	410517	494941	417572	252174	257023	357526	25.9917	146	0		726	13197	456155	65817	184928	144165	25.9917
16.5283	513182	181697	198135	213639	183266	464129	420432	319281	311720		1	178033	258773	486111	583965	301377	16.5283	147	0		236498	1	290827	83683	85994	545007	207002	16.5283	147	0		134956	309681	480143	168134	114858	369730	262917	16.5283	147	0		3060	126710	315688	168180	161697	155067	16.5283
22.3258	292365	1	354614	437280	394256	1	1	326346	225608		1	419408	1	1	350994	154081	22.3258	238	0		347479	1	347822	459916	421743	1	262827	22.3258	238	0		1	446817	551301	369934	403682	290984	343786	22.3258	238	0		1	697724	1	597518	1	259049	22.3258
14.4258	151554	1	303315	733344	1	343693	395903	508094	304488		1	398340	316476	45330	515280	255085	14.4258	73	0		432617	1	1	1	671839	407139	251933	14.4258	73	0		174051	470101	249948	468397	1	460836	303889	14.4258	73	0		1	1	369566	1	1	73914	14.4258
22.2792	197212	1	237611	305584	256838	370124	386670	223844	247236		892183	271480	188622	1	212997	313057	22.2792	175	0		1	1	225708	322592	302343	1	141774	22.2792	175	0		1	306681	1	269406	258725	180686	169250	22.2792	175	0		1	497994	355139	428800	421772	340741	22.2792
22.3217	1	1	1	1	1	1	957765	1	119722		1	720714	1	1	1	144144	22.3217	327	0		1	1	1	730881	733663	1	244091	22.3217	327	0		1	1	876887	665163	1	1	257009	22.3217	327	0		1	1207990	1	1021273	1	445853	22.3217
26.3075	161644	200174	186756	256504	281818	420536	376121	183821	258422		311377	318032	158953	153175	247079	237723	26.3075	131	0		42417	12801	243662	324916	244138	125625	165593	26.3075	131	0		247140	312789	259928	213612	258037	164132	242606	26.3075	131	0		1	46039	314109	446682	246447	210656	26.3075
22.2617	211720	212564	262574	329031	271118	405477	412242	246272	293875		1031111	286666	205479	1	1	304652	22.2617	172	0		1	1	240548	350431	337592	1	154762	22.2617	172	0		1	330072	352747	1	275625	191928	191729	22.2617	172	0		1	539624	378688	472919	1	278247	22.2617
19.9908	1	1	582461	390349	1	1	441819	1	176829		1	1	1	1	1	1	19.9908	73	0		283493	98010	951165	44380	715493	1	348757	19.9908	73	0		1022002	409328	1	677823	1	1413019	587029	19.9908	73	0		226035	1	485792	224025	448754	276921	19.9908
14.5967	417739	263235	476630	166381	500407	179520	353455	395582	344119		91314	165353	225065	218871	360215	212164	14.5967	143	0		63973	1	326308	254563	118018	209645	162085	14.5967	143	-182034		200103	177537	561160	329342	229655	333345	305190	14.5967	143	0		1	70899	239735	218677	175477	140958	14.5967
19.5542	22365	39814	686247	964081	666622	1	1	695961	384386		1	1	1	371502	12277	76756.4	19.5542	74	0		510170	733	40843	1	853522	317106	287062	19.5542	74	0		1	920828	1	704591	1	53027	279742	19.5542	74	0		1145	78434	819174	1	1	179751	19.5542
15.02	1	1	1	1	3523763	198634	1	1	465300		1	348037	1	1	1	69608.2	15.02	75	0		1	86770	415765	93306	1	2587984	530638	15.02	75	0		1	1	1	1	228318	1	38053.8	15.02	75	0		1	1	1	146592	1	29319.2	15.02
16.0375	471150	352628	164169	384863	1	194191	225231	571884	295515		1	220149	194379	267041	354624	207239	16.0375	73	0		396659	10409	378094	703936	29308	600852	353210	16.0375	73	0		1	165663	1	390897	118493	300440	162582	16.0375	73	0		5430	162404	165013	178003	241580	150486	16.0375
26.2517	1	1	1	1	1	1	1	8494871	1.06186e+06		1	1	1	1	1	1	26.2517	73	0		1	1	1	1	1	1	1	26.2517	73	0		1	1	1	1	1	1	1	26.2517	73	0		102391	1	1	1	1	20479	26.2517
21.0225	1	334427	281605	235745	549913	142455	180301	151698	234518		92906	170399	697363	330883	266730	311656	21.0225	75	0		386372	4495	745460	464065	221205	389464	368510	21.0225	75	0		208789	140724	137546	158952	1	418861	177479	21.0225	75	0		1	280977	78042	273371	215682	169615	21.0225
16.5267	369682	261502	172616	223704	192517	417810	359100	351242	293522		76930	198177	217011	368148	535441	279141	16.5267	74	0		258588	1	266030	117437	86233	494149	203740	16.5267	74	0		161405	312499	451645	201440	177509	359931	277405	16.5267	74	0		2552	106367	299569	185181	147914	148317	16.5267
24.91	1	1	1	292429	1	564211	173465	1	128764		1	463121	1	1	1	92625	24.91	174	0		555676	1	1	1076369	420698	1156480	534871	24.91	174	0		1	862607	1	1064234	1	1	321141	24.91	174	0		1	269	338993	42107	139832	104240	24.91
10.68	172362	161837	1	230219	236994	222326	289891	1	164204		1	218421	183454	151519	125431	135765	10.68	79	0		175213	1238486	140402	199909	111693	205449	345192	10.68	79	0		219311	206222	1	190191	175663	120106	151916	10.68	79	0		1054623	204706	210547	267810	312221	409981	10.68
21.3392	1	1093547	1	1	1	1	1	1	136694		380628	1	1181696	1	1776113	667688	21.3392	75	0		1	1	1366444	1	1	1	227742	21.3392	75	0		1	1	1	1	1722751	906768	438254	21.3392	75	0		1	1	1	1	1	1	21.3392
16.8025	260197	519748	287877	407717	199205	248627	385311	292680	325170		1	146259	232446	1	214837	118709	16.8025	73	-206461		439617	1	322215	171255	157758	1105958	366134	16.8025	73	0		1	355159	494374	258299	328717	1	239425	16.8025	73	0		16508	186648	569222	237646	348094	271624	16.8025
22.4333	1	391412	435660	554687	504282	1	613974	425332	365669		1	535301	406035	372557	426223	348023	22.4333	148	0		408005	1405	1	1	534665	1	157346	22.4333	148	0		1	1	111230	499363	516449	1	187841	22.4333	148	0		1	1	538028	1	1	107606	22.4333
18.0867	742201	619359	1	523323	1	1	1	286951	271480		1	1	349150	680780	1	205987	18.0867	86	0		761048	1936	1	1	366512	582460	285326	18.0867	86	0		1	1	1	1	1	772662	128778	18.0867	86	0		986	299249	1	1	182423	96532	18.0867
22.3592	1	1	411725	508509	488430	585197	1	1	249233		1	1	1	1	400395	80079.8	22.3592	148	0		391559	1	412561	521630	503096	1	304808	22.3592	148	0		1	504890	530450	1	1	321073	226069	22.3592	148	0		1	1	1	712064	700687	282551	22.3592
14.0567	172571	224514	224092	352664	223552	386391	151030	248737	247944		1	324709	274471	222645	256945	215754	14.0567	225	0		270591	1106	250507	320933	333705	150093	221156	14.0567	225	0		249811	346264	1	286005	310782	150251	223852	14.0567	225	0		713	347712	321671	1	436337	221287	14.0567
26.29	203675	168286	222228	213064	256397	398250	344155	242264	256040		231542	318911	1	191256	250106	198363	26.29	161	0		29531	8378	231897	297820	206468	157202	155216	26.29	161	0		228927	328096	295719	279673	221059	173058	254422	26.29	161	0		1	32243	336708	474463	200057	208694	26.29
22.5042	804480	820670	1	1	1	1	1	865043	311275		1	1	824830	805169	1	326000	22.5042	133	0		1	1	949526	1	1	671207	270123	22.5042	133	0		885366	1	86176	1	1	781845	292232	22.5042	133	0		60084	1	1	1	1	12017.6	22.5042
26.4733	1	174547	528956	152967	297051	278995	242046	578887	281681		1	551127	1	428134	457802	287413	26.4733	73	0		14415	1	371260	203702	153712	1	123848	26.4733	73	0		289814	450495	1	415204	224176	343551	287207	26.4733	73	0		2108	19064	454603	1	188625	132880	26.4733
14.0475	152250	196693	220025	319713	1	358379	183953	218569	206198		1	289918	205449	186110	240040	184304	14.0475	131	0		248857	477622	234617	1	289834	144669	232600	14.0475	131	0		215145	280985	189824	256716	278136	125691	224416	14.0475	131	0		303790	434485	299773	1	417442	291098	14.0475
22.255	249913	1	1	1	1	1	527094	1	97126.6		1436635	334920	1	235215	1	401354	22.255	131	0		267031	213	285560	478716	473093	1	250769	22.255	131	0		267722	449784	494891	309820	327739	1	308326	22.255	131	0		677	1	499929	678798	1	235881	22.255
8.66667	1	1	1	1	1	838	310	157	163.75		841	1	1	1	1	169	8.66667	77	0		1	2152	1	1	208	1	394	8.66667	77	0		640	1889619	1967705	769	142	1	643146	8.66667	77	0		1294580	1	1600425	1892	1526870	884754	8.66667
8.26333	4709	198903	232730	133785	242423	247606	352065	220157	204047		833024	261926	176492	209584	158369	327879	8.26333	121	0		162461	1011318	235333	265954	283376	90210	341442	8.26333	121	0		252254	1	1	275992	255110	219094	167075	8.26333	121	0		1	172323	1	422270	1	118919	8.26333
12.665	143051	163020	184813	252269	4322	288665	324503	180475	192640		421746	248685	163454	158118	167434	231887	12.665	129	0		191961	407599	178099	262112	253238	133355	237727	12.665	129	0		175568	253900	26333	206857	229180	154303	174357	12.665	129	0		7990	407625	268274	243659	351382	255786	12.665
18.355	1	1	303973	486134	255365	399398	643846	376175	308112		129678	216689	281736	1	1	125621	18.355	86	0		515777	4547	1	250290	300687	538279	268264	18.355	86	0		1	483150	289295	267272	267851	1	217928	18.355	86	0		1	1	284695	225891	353860	172890	18.355
22.2233	222499	1	316723	383913	336658	488728	439442	288893	309607		1	386742	235843	236762	289221	229714	22.2233	149	0		309238	1	261952	1	1	171535	123788	22.2233	149	-185819		279829	1	1	334439	351515	201828	194602	22.2233	149	0		4061	1	1	1	541294	109072	22.2233
22.2917	1	258722	1	1	1	1	461827	1	90069.4		1178191	293574	1	203067	1	334967	22.2917	149	0		1	1	248983	409654	397561	1	176034	22.2917	149	0		232820	391878	422651	1	284059	1	221902	22.2917	149	0		785	625089	437976	567019	1	326174	22.2917
19.2258	397206	461513	1	249043	1	297269	1	1	175629		319594	576787	1	1	547152	288707	19.2258	73	0		1	1	479866	1	1	1167208	274513	19.2258	73	0		442577	1	1	1	957210	1021584	403562	19.2258	73	0		1	1	179680	1	149202	65777	19.2258
36.2575	443215	1	286331	4663	120485	132603	5017	233332	153206		1	87448	1	1	120368	41563.8	36.2575	73	0		168062	1	289886	6435	1	220070	114076	36.2575	73	0		1	7963	20437	1	305878	5209446	923954	36.2575	73	0		1038	1	7266	21610	7142	7411.4	36.2575
10.4608	234933	254494	261893	315780	298372	1	378138	263394	250876		122064	325353	229087	253070	1	185915	10.4608	61	0		275654	123838	299377	309552	300206	1	218105	10.4608	61	0		284125	316111	1	286404	294874	1	196919	10.4608	61	0		64809	444467	315832	1	400397	245101	10.4608
19.4992	1	1	1	1	1	1	1	1	1		1	1	1	3997652	1	799531	19.4992	73	0		1	4968	1	1	1	3972432	662901	19.4992	73	0		1	1	1	1	1	1	1	19.4992	73	#DIV/0!		19760	1	1	1	1	3952.8	19.4992
26.3083	219354	175711	189535	275785	179344	303109	286416	217896	230894		237497	248187	182821	173815	199902	208444	26.3083	204	0		42123	10257	206210	224939	166392	235417	147556	26.3083	204	0		207102	285165	647990	256644	186430	179564	293816	26.3083	204	0		1	40298	279627	333818	196055	169960	26.3083
12.6908	1	164978	182845	260261	3519	300760	335522	186379	179283		399313	249951	165592	160619	162627	227620	12.6908	108	0		190937	336042	170679	265727	254106	128004	224249	12.6908	108	0		179852	259046	21212	198523	232658	152185	173913	12.6908	108	0		6564	420352	276236	242141	357941	260647	12.6908
17.6317	201800	267104	338015	293831	311069	168507	180776	271154	254032		202505	244667	198352	195347	211857	210546	17.6317	73	0		124955	43625	233598	286612	23789	190445	150504	17.6317	73	-103528		1	311242	342398	195020	207248	311908	227970	17.6317	73	0		1692	159974	210165	619742	303416	258998	17.6317
14.1092	182038	1	253750	218586	511321	300469	284936	1	218888		380304	338031	216623	111671	1	209326	14.1092	101	0		1	1	159865	362095	1	38045	93334.7	14.1092	101	0		1	248374	653330	230328	343779	1	245969	14.1092	101	0		1	369437	369480	517026	339488	319086	14.1092
14.1892	1	1631222	1	1	1	1	1	1	203904		1	1	1	1	1	1	14.1892	299	0		1794338	1	1	1	1	1377474	528636	14.1892	299	0		1	1	1	1	1	1523691	253949	14.1892	299	0		1	1	1	1	1	1	14.1892
24.9725	1	478620	1	1	718844	1	54574	594070	230764		27120	1	473201	439038	868892	361650	24.9725	74	0		1	1	530195	864837	1	420162	302533	24.9725	74	0		535557	1	335408	1	1	437993	218160	24.9725	74	0		1	392044	1	102587	57731	110473	24.9725
11.8258	196589	232059	248014	389552	336501	211472	460671	213114	285996		267013	1	252396	259982	221557	200190	11.8258	147	0		399751	27151	307440	1	1	744805	246525	11.8258	147	0		274077	1	1	1	287630	1	93618.5	11.8258	147	93618.5		834608	497906	409635	175489	1	383528	11.8258
20.9225	377648	377706	342966	145695	48023	173100	65410	161920	211558		13947	78112	478531	250158	288518	221853	20.9225	101	0		282789	1	527047	493177	269624	290342	310497	20.9225	101	0		40084	196300	78826	87272	640637	401341	240743	20.9225	101	0		1	527528	72483	100812	84879	157141	20.9225
15.9208	178885	264300	128134	357353	1	82154	181188	232344	178045		59743	106767	217409	378653	526318	257778	15.9208	188	0		456374	26842	189474	1	66971	1238052	329619	15.9208	188	0		170443	314558	71056	119429	82974	366480	187490	15.9208	188	0		1	185250	328109	1	151458	132964	15.9208
25.9883	245166	238796	314724	147781	41059	308053	215328	285559	224558		91445	372334	296238	204886	296612	252303	25.9883	218	0		22406	5923	229374	266150	35651	193128	125439	25.9883	218	0		266792	352403	484006	374583	219065	223678	320088	25.9883	218	0		552	10463	397590	71612	162676	128579	25.9883
26.0017	216679	304811	340524	199293	58761	409430	280985	335066	268194		132485	414706	1	219455	1	153330	26.0017	101	0		33510	9221	282634	335807	49379	1	118425	26.0017	101	0		330722	400112	386289	1	283021	206563	267785	26.0017	101	0		1	16005	400469	84650	210193	142264	26.0017
17.4425	243567	257842	309777	342575	1	364384	319551	265662	262920		255997	1	272375	243088	296660	213624	17.4425	176	0		233453	60322	299779	362831	1	214985	195228	17.4425	176	0		1	364006	218913	1	359988	1	157152	17.4425	176	0		1	1	264061	1	420385	136890	17.4425
14.05	136690	200213	225706	317008	1	380155	176786	223074	207454		74400	301126	214462	174753	222247	197398	14.05	119	0		250301	144985	224432	320462	308313	125986	229080	14.05	119	0		221324	319778	191943	254072	289365	136144	235438	14.05	119	0		73752	377660	322468	1	394584	233693	14.05
19.3708	1	1	1	1	1054254	1	1	1	131783		1	1114996	1	520429	1	327086	19.3708	74	0		1	1	699000	1	1076486	1	295915	19.3708	74	0		1	1	1	1	1060513	435530	249341	19.3708	74	0		1	1811398	1	1	1	362280	19.3708
19.505	1	1	1	1556346	1100220	1	1	1166035	477826		1	1	1	628990	1	125799	19.505	75	0		796075	7355	1	1	1351384	436744	431927	19.505	75	0		1	1	1	1	1	1	1	19.505	75	0		10227	1	1	1	1	2046.2	19.505
38.345	699578	13164	536766	5005	51173	385491	49664	169785	238828		1811	473884	1503892	839266	143414	592453	38.345	73	0		2883	1	46406	10051	186031	222418	77965	38.345	73	0		234040	348703	234697	449506	56648	14387	222997	38.345	73	0		1	6312	48623	637209	9229	140275	38.345
25.0475	1	1	1	1	6760707	1	1	431862	899072		1	1	1	1	1	1	25.0475	73	0		1	1	1	1	1	1	1	25.0475	73	0		1	1	36445	1	377305	1	68959	25.0475	73	0		1	1	1	1	13998	2800.4	25.0475
25.9858	234257	225566	279988	170004	49864	315907	240214	263974	222472		119215	341061	269049	198210	266855	238878	25.9858	206	0		28553	7653	229415	268334	44620	176305	125813	25.9858	206	0		252414	324129	397755	340478	229358	215422	293259	25.9858	206	0		1	13815	357156	71402	185452	125565	25.9858
25.98	250691	260236	334106	166910	46589	345034	238025	312201	244224		108122	400813	300376	1	1	161863	25.98	148	0		26620	7507	252551	291816	40218	184336	133841	25.98	148	0		295234	380571	458344	381382	242303	1	292972	25.98	148	0		1	12558	414577	76264	179905	136661	25.98
22.3025	1	1	1	1462183	1	1	1	1	182774		1	1	1	1	1	1	22.3025	174	0		1	1	1	1	1412591	1	235433	22.3025	174	0		1	1	1699032	1297900	1	1	499489	22.3025	174	0		1	1	1	1	1	1	22.3025
20.1308	144252	1	114709	138809	813840	1	108781	66112	173313		1	1	38266	249241	84992	74500.2	20.1308	73	0		4415029	1505	1	1	49792	279913	791040	20.1308	73	0		159298	117641	247955	1	1	1	87482.8	20.1308	73	0		43490	1	198728	1	106516	69747.2	20.1308
22.4433	255255	270970	296769	384254	344451	1	434113	1	248227		1	375825	1	253491	302811	186426	22.4433	131	0		300587	1387	301300	359859	371362	1	222416	22.4433	131	0		286533	1	101043	347165	359697	1	182407	22.4433	131	0		1786	1	376953	487127	481170	269407	22.4433
10.4008	181564	223594	234021	1	284816	412471	353837	1	211288		728344	1	202613	209722	1	228136	10.4008	149	0		1	203279	1	283687	277738	184810	158253	10.4008	149	0		230294	1	4988	1	268212	1	83916.2	10.4008	149	0		379	402790	1	353409	414231	234162	10.4008
22.4567	1	355211	390413	497264	443401	1	1	388881	259397		1	472166	361850	1	385618	243927	22.4567	328	0		388564	1	415433	1	474684	319953	266439	22.4567	328	0		381566	1	1	447397	466693	1	215943	22.4567	328	0		1	1	480078	1	1	96016.4	22.4567
17.4158	662439	1	1	1	969515	1	1	1	203995		1	1	656405	671834	854914	436631	17.4158	75	0		797	1790	786137	1	1	390080	196468	17.4158	75	0		1	1191698	259	1	1	653349	307552	17.4158	75	0		1	1	1	1	1	1	17.4158
26.0675	109859	21569	1	18874	1	27194	40480	16369	29293.4		26531	61916	85379	1320125	1897564	678303	26.0675	147	0		1	2016	46188	61401	18832	126457	42482.5	26.0675	147	0		37503	53066	249556	106686	30271	1340359	302907	26.0675	147	0		1	1	66032	1	80128	29232.6	26.0675
36.1683	1	1	1	1	94113	1	1	1	11765		1	1	1	6929605	1	1.38592e+06	36.1683	73	0		1	17502	1	555	181221	1	33213.5	36.1683	73	0		1	1	3079	1	1	1	514	36.1683	73	0		38111	611	1	5941	344	9001.6	36.1683
22.42	1	489243	1	688031	625660	1	1	516759	289962		1	1	1	460727	535571	199260	22.42	225	0		533177	1	543793	1	655113	1	288681	22.42	225	0		506281	1	1	603588	630151	1	290004	22.42	225	0		1004	1	1	1	1	201.6	22.42
14.0525	140781	182680	216392	302924	207607	339788	141229	209689	217636		1	279455	224266	178130	214176	179206	14.0525	151	0		236411	12480	211701	288959	286372	119895	192636	14.0525	151	0		209412	305956	152278	244706	267322	125529	217534	14.0525	151	0		6086	325310	286871	1	371205	197895	14.0525
26.0808	1	1	1	1	22899	1	18025	1	5116.25		11316	1	1	1577469	2234986	764755	26.0808	133	0		3418	1806	1	1	5669	49735	10105	26.0808	133	0		1	1	1	1	1	1632941	272158	26.0808	133	0		1155	1704	1	31822	27220	12380.4	26.0808
26.3767	1	1	180355	1	1	1	1	1	22545.2		1	782570	1	1	621224	280759	26.3767	75	0		1	19342	686796	1	1	1	117690	26.3767	75	0		1	821641	1	1	1	370194	198640	26.3767	75	0		8665	1	844015	1330621	1	436661	26.3767
15.0625	625370	265408	222122	215411	1	1	305342	535419	271134		1	1	373894	219940	286956	176158	15.0625	75	0		215348	1	1	1	458799	336534	168447	15.0625	75	0		590065	622664	33019	286591	1	244341	296114	15.0625	75	0		1	412831	580726	1	449396	288591	15.0625
38.6558	349489	15609	192863	6970	57094	164174	42598	149687	122310		35309	930744	1491219	307676	144422	581874	38.6558	73	0		9692	2269	38604	23863	162085	81792	53050.8	38.6558	73	0		105850	186712	125735	751091	63843	42	205546	38.6558	73	0		981765	4981	38340	542650	13116	316170	38.6558
12.4325	1	68795	234437	282755	1	138337	234003	274046	154047		1	342685	389666	1	445956	235662	12.4325	73	0		1	322895	255042	495167	364107	1	239536	12.4325	73	0		61371	311358	286472	1	214523	1	145621	12.4325	73	0		265905	391514	304581	234826	392865	317938	12.4325
14.1117	129920	1	223603	216013	367531	284375	242532	174807	204848		302671	307284	177666	96774	108922	198663	14.1117	89	0		1	1	145835	321142	132889	49709	108263	14.1117	89	0		46263	243692	466927	195550	308429	54633	219249	14.1117	89	0		1	322412	298640	408865	307997	267583	14.1117
21.645	71965	255415	175224	247016	187611	148657	247619	183057	189570		1	88252	1	316144	1	80879.8	21.645	73	0		1	1	96415	179290	92194	1245785	268948	21.645	73	0		154262	335620	160128	227308	183140	291536	225332	21.645	73	0		814048	332165	216321	1	432522	359011	21.645
17.44	168651	179048	211098	248172	239493	285882	258924	193973	223155		254969	210433	172296	158820	188463	196996	17.44	160	0		178920	68134	200451	266830	110776	122024	157856	17.44	160	0		161696	246056	186587	146086	249495	165893	192636	17.44	160	0		102	136660	208107	172708	318983	167312	17.44
14.345	156589	533410	1	1	304365	1	439750	542549	247083		233287	1	1	1	1	46658.2	14.345	73	0		564059	115387	1	1	1	509555	198167	14.345	73	0		1	1	282772	1	1	689915	162115	14.345	73	0		49914	517990	1	81494	533174	236515	14.345
18.1742	581152	801192	1	1468120	1	1	1	1	356309		1	1	941928	801596	825539	513813	18.1742	75	0		1	1	938733	1	1	1	156456	18.1742	75	0		942233	1	1	1	1	1	157040	18.1742	75	0		1	1	1	1	1	1	18.1742
18.9142	1	1	1080749	1579385	1	1	1	1	332518		1	1	99058	742747	1	168362	18.9142	75	0		1	92447	1	1	1624780	27039	290712	18.9142	75	0		1	1	1	1	1	1	1	18.9142	75	0		47794	26834	1	1	1	14926.2	18.9142
20.9275	304129	293930	268407	226356	59806	197031	86156	190542	203295		32023	103501	372143	265762	322382	219162	20.9275	174	0		358162	1	391599	379793	281977	1	235256	20.9275	174	0		76361	247235	118976	112724	405956	1	160209	20.9275	174	0		1	530066	117383	115507	111949	174981	20.9275
25.9992	1	272820	314621	186070	54497	370848	260127	311129	221264		129307	388430	264578	1	1	156463	25.9992	116	0		31599	9229	261717	305953	47519	1	109336	25.9992	116	0		302279	377579	374218	336995	259851	1	275154	25.9992	116	0		1	15362	386511	75325	197587	134957	25.9992
18.1833	587426	740481	1	940075	1	1	1	747392	376922		15517	1	628709	592745	1	247395	18.1833	153	0		1	1	708473	1	1	1	118080	18.1833	153	0		1	1	1	1	1	599538	99923.8	18.1833	153	0		1	1	1	1	1	1	18.1833
22.2075	1	1	1	1	835921	1	1	1	104491		1	938423	581710	576452	708478	561013	22.2075	130	456522		1	1	660308	1	1	1	110052	22.2075	130	0		678404	1	1	807959	864382	1	391791	22.2075	130	0		1	1	1	1	1	1	22.2075
16.7458	1	1	1	1	349391	1	1	1	43674.8		1	1	1	700293	213264	182712	16.7458	73	0		1	119445	1	1	1	104865	37385.7	16.7458	73	0		1	11192	1	1	1	704168	119227	16.7458	73	0		85669	1	664864	1	3956	150898	16.7458
24.9267	457835	461724	574389	1	527687	1	1	549925	321445		4331	1	493484	437485	516408	290342	24.9267	143	0		220116	1	536876	430226	1	1	197870	24.9267	143	0		471819	347137	67566	1	543778	1	238384	24.9267	143	0		1	1	138281	20201	9671	33631	24.9267
12.7008	131728	137067	196465	269393	8298	347470	1	1	136303		540806	268451	1	130847	139838	215989	12.7008	103	0		197646	488604	145267	285019	217026	106662	240037	12.7008	103	0		145962	1	33107	222985	264063	130327	132741	12.7008	103	0		13836	429947	317635	323291	1	216942	12.7008
21.265	1	1	493652	1	1	1	613064	1	138340		1	209864	1	472395	1	136452	21.265	70	0		407405	787	415628	193889	235633	1	208890	21.265	70	0		489195	598545	32497	304291	538419	1	327158	21.265	70	0		36311	35250	1	157610	779661	201767	21.265
22.2958	1	1	1	1	1	1	421324	1	52666.4		1114595	271984	1	192158	1	315748	22.2958	160	0		1	1	236788	369301	367946	147249	186881	22.2958	160	0		1	354265	381520	242398	262761	199282	240038	22.2958	160	240038		1	571498	397110	515866	1	296895	22.2958
22.2317	211894	240218	290691	350658	307772	446465	1	265645	264168		1	356649	221712	217010	267992	212673	22.2317	160	0		277006	1	245987	1	1	175662	116443	22.2317	160	0		257618	1	1	307357	322475	1	147909	22.2317	160	0		1	1	1	1	490496	98100	22.2317
17.9508	1	1	1	1	1	1	1	1	1		29262	1	1	1	2067549	419363	17.9508	73	0		2156764	29757	1843229	1	841022	1	811796	17.9508	73	811795		1	1	103795	1	1	1	17300	17.9508	73	0		1	1	1	1	1	1	17.9508
26.23	676634	1	919205	1	1	1	1	854114	306245		1	1	749571	621031	1	274121	26.23	129	0		1	1	1	1	1	493474	82246.5	26.23	129	0		1	1	1168073	954317	1	1	353732	26.23	129	0		5508	1	1	1	1	1102.4	26.23
22.3767	1	1	1	1	1	1	1013768	1	126722		1	1	1	542906	1	108582	22.3767	74	0		1	1	1	818544	804027	1	270429	22.3767	74	0		1	1	1	1	774702	1	129118	22.3767	74	0		1	1	910530	1117539	1097349	625084	22.3767
21.3775	215164	257142	196793	316472	306044	449634	255816	223537	277575		445	219041	186772	208862	224059	167836	21.3775	158	-109739		205240	1	259748	250207	190658	1	150976	21.3775	158	-126599		139515	236479	320460	146504	232162	211313	214406	21.3775	158	0		1	227088	230592	143287	187170	157628	21.3775
22.3625	1	1	1	1	1	1	1	1	1		1	1	367046	320207	1	137451	22.3625	75	0		216495	1	331985	1	323144	1	145271	22.3625	75	145270		275087	436721	529140	417834	382622	1	340234	22.3625	75	340234		1	744278	544327	605652	500190	478890	22.3625
18.1675	1	484803	516767	713458	1	1	210675	543257	308620		13374	1	493566	1	1	101389	18.1675	148	0		543357	1	1	1	618071	1	193572	18.1675	148	0		558651	1	1	549568	583548	1	281962	18.1675	148	0		1	1	560821	1	1	112165	18.1675
19.4283	215528	266490	258842	381943	305903	1	253517	274028	244532		1	345045	227694	1	1	114548	19.4283	158	0		359352	1	335382	281757	142759	189838	218182	19.4283	158	0		260047	392063	206549	304254	242031	1	234158	19.4283	158	0		1	278478	331366	286607	220542	223399	19.4283
14.0792	76382	170001	204724	269423	219225	344695	203430	191624	209938		117874	251484	162929	95762	180617	161733	14.0792	77	0		201206	62874	200430	281394	257928	83811	181274	14.0792	77	0		1	236338	220681	222915	244038	84595	168095	14.0792	77	0		37640	397198	268060	1	347699	210120	14.0792
10.9325	1	1	1	1	1	61118	1	60860	15248		1	1	1	65316	1	13064	10.9325	73	0		1	137457	1	1	1	1	22910.3	10.9325	73	0		1	7691	122250	83977	1	6255041	1.07816e+06	10.9325	73	0		1	82841	1	44382	6549	26754.8	10.9325
17.0567	320156	546168	179381	174776	10851	288165	143522	301963	245623		12364	161268	28380	27643	214334	88797.8	17.0567	189	0		332591	1	16903	7329	110056	59150	87671.7	17.0567	189	0		599381	87604	33921	652843	38906	467235	313315	17.0567	189	0		1	95491	199136	73540	66931	87019.8	17.0567
22.3208	1	1	1	1	1	529474	563692	340262	179179		1	1	1	1	1	1	22.3208	328	0		1	1	1	1	444294	1	74049.8	22.3208	328	0		335160	1	482977	400409	431235	1	274964	22.3208	328	0		67	707374	468570	1	599159	355034	22.3208
17.5017	1	1	1	308777	206826	395268	349930	237703	187313		310968	291387	1	1	147497	149971	17.5017	87	0		228467	80493	1	327865	128235	1	127510	17.5017	87	0		216939	1	250018	177875	1	134454	129881	17.5017	87	0		435	174354	274120	214957	429053	218584	17.5017
26.2117	769874	1	1127506	5266	1	5803	1	1	238557		1	1	902832	1	13274	183222	26.2117	103	0		3504	353	1	1	1	592749	99434.8	26.2117	103	0		1	9596	1456689	1125608	1	15763	434610	26.2117	103	0		1	4486	14919	1	6220	5125.4	26.2117
22.8433	1225867	1	1	1	1	331798	1	602078	269968		81720	435690	1	1	1	103483	22.8433	73	0		1	1	1	489858	1	726813	202779	22.8433	73	0		1	1	1	1	1	934412	155736	22.8433	73	0		1	309616	21203	1	1	66164.4	22.8433
11.6083	69336	248918	221665	252220	57413	321371	95254	116915	172886		88631	319793	181051	228211	262367	216011	11.6083	72	0		294386	1	225754	155168	146442	228811	175094	11.6083	72	0		239351	321338	15113	261886	305551	249268	232084	11.6083	72	0		1272	263216	320325	17343	455074	211446	11.6083
22.5058	2307926	1	1	1	1	1	1	1	288492		1	1	1	2302936	1	460588	22.5058	147	0		1	807	1	1	1	1	135.333	22.5058	147	0		1	1	1	1	1	2205633	367606	22.5058	147	0		12998	1	1	1	1	2600.4	22.5058
8.07833	1	1	800487	1	1	1	911616	1	214014		137606	3591	1	1	1	28240	8.07833	75	0		1	1	1036453	1108508	1096827	461559	617225	8.07833	75	0		863186	96240	1	1	2510	1	160323	8.07833	75	0		154388	1	150367	1	1	60951.6	8.07833
8.67417	1	1	265	23296	162	1216	1578	1	3315		1	1	1	1	1	1	8.67417	72	0		1	2989	1	1	1	1	499	8.67417	72	0		1	1681231	845210	1	1	1	421074	8.67417	72	0		264232	1	1525556	1	2440880	846134	8.67417
22.165	177941	1	1	294233	299100	413215	386222	241948	226583		1	319654	158290	209228	241975	185830	22.165	72	0		235920	1	216558	1	1	87345	89971	22.165	72	0		236251	1	1	261150	304897	124661	154494	22.165	72	0		10353	508264	1	1	433586	190441	22.165
8.64083	2788	1	1	28009	1	40555	1	1	8919.62		1	51186	1	1	1	10238	8.64083	73	0		1	5801	1	1	32635	1	6406.67	8.64083	73	0		1	1	6508651	59041	1	1	1094616	8.64083	73	0		1	1	1	34840	1	6968.8	8.64083
19.22	140033	162500	261321	164483	153010	157106	139799	196481	171842		169716	135083	247056	270766	305473	225619	19.22	174	0		228958	1	213981	306516	247462	291925	214807	19.22	174	0		185334	309207	36626	183969	336723	457550	251568	19.22	174	0		1	139733	159243	123609	183812	121280	19.22
14.7008	22108	85788	111737	76444	138928	69509	66241	95662	83302.1		984408	301020	199286	152448	391069	405646	14.7008	77	322344		195749	305385	144582	374566	245064	54539	219981	14.7008	77	136679		150078	169074	328928	246968	180036	1	179181	14.7008	77	179181		12207	126865	51175	151365	120464	92415.2	14.7008
18.705	87114	170528	226581	262089	191909	349647	331269	1	202392		339895	290266	135092	103179	228955	219477	18.705	61	0		196926	1	159408	1	297936	1	109046	18.705	61	0		220818	252647	295539	218110	282257	128953	233054	18.705	61	0		1625	443004	1	347508	1	158428	18.705
18.7733	1	414304	181	1733	225655	717102	564	1	169943		350920	515646	1497	1484	444115	262732	18.7733	175	0		1536	99386	219828	200611	1	1	86893.8	18.7733	175	0		1	404957	1	282	543880	1	158187	18.7733	175	0		1	646891	1	426076	19	214598	18.7733
8.92333	16238	307994	1	243294	279184	237416	1	347627	178969		24912	1	531962	458126	431029	289206	8.92333	78	0		696705	29299	387299	1	1	247150	226742	8.92333	78	0		1	1	5951	1	1	514789	86790.7	8.92333	78	0		1	444873	1	353270	1	159629	8.92333
20.0517	111624	627523	105653	1	1	359831	553194	162369	240024		35374	209867	109105	1	274847	125839	20.0517	75	0		1202084	1	75796	1	320406	106390	284113	20.0517	75	0		242607	200080	68572	177517	50752	41712	130207	20.0517	75	0		1	280890	143518	100752	168600	138752	20.0517
8.94	12249	192944	152384	153638	178931	147694	1	219023	132108		308449	308602	326194	283577	270543	299473	8.94	153	167365		432581	1	241599	299242	351678	159887	247498	8.94	153	0		324690	1	4514	287911	165248	314502	182811	8.94	153	0		1	276237	1	218092	1	98866.4	8.94
18.1075	152312	1	282144	329678	327667	1	179636	1	158930		28557	347963	239535	1	1	123211	18.1075	60	0		274313	1	1	263505	375082	110297	170533	18.1075	60	0		1	202893	66552	274317	351119	1	149147	18.1075	60	0		946	149869	325629	322372	445641	248891	18.1075
10.4242	1	1	188496	232533	216001	299502	274042	196097	175834		479489	240345	169586	1	189887	215862	10.4242	191	0		224681	100783	213076	227555	218773	1	164145	10.4242	191	0		1	229388	281	1	216924	1	74432.7	10.4242	191	0		322	293897	233085	261241	313222	220353	10.4242
22.2433	1	236031	261595	1	199183	1	348611	1	130678		1075858	1	134780	1	164236	274975	22.2433	72	0		1	1	166524	321257	319238	1	134504	22.2433	72	0		1	301572	354190	1	1	1	109294	22.2433	72	0		5252	1	331972	470570	1	161559	22.2433
14.7725	73384	110789	167808	211174	200045	270043	265020	163932	182774		248518	212674	119792	101343	140446	164555	14.7725	72	0		147010	50673	155079	219045	203404	1	129202	14.7725	72	0		120613	192741	238885	187574	207925	84706	172074	14.7725	72	0		6256	335798	232113	299359	284964	231698	14.7725
9.4125	11292	1	117786	1	1	181370	151450	1	57737.8		288894	89720	1	1	332674	142258	9.4125	75	0		1	974604	87958	1	1	1	177094	9.4125	75	0		1221004	60569	93092	1079699	72987	1	421225	9.4125	75	0		366697	148721	1	232489	190441	187670	9.4125
8.66583	1	1	1	1	1	1	502	1	63.625		1	1	1	1	1	1	8.66583	100	0		1	29915	1	160	57	1	5022.5	8.66583	100	0		1	1579496	1644648	1	1	1	537358	8.66583	100	0		781700	1	1227792	1	1167638	635426	8.66583
24.9358	39076	207303	168621	81104	1	64345	62012	143249	95713.9		35394	172142	62880	142199	118021	106127	24.9358	273	0		218342	1	120149	1434752	99384	715851	431413	24.9358	273	0		58959	215473	552430	128233	31004	135019	186853	24.9358	273	0		1	641432	91766	152951	67696	190769	24.9358
18.8025	1	234188	324771	398150	1	1	493212	300646	218871		1	1	225483	195597	243220	132860	18.8025	131	0		287041	1	1	1	392429	185832	144218	18.8025	131	0		247545	1	428237	336613	1	191451	200641	18.8025	131	0		1576	1	451628	1	545583	199758	18.8025
26.2892	190902	106019	212890	136480	159496	246788	224320	206838	185467		163077	244208	192539	172552	183649	191205	26.2892	321	0		20640	5345	158660	189790	135751	148221	109734	26.2892	321	-75732.1		150479	250487	290397	235971	142019	132807	200360	26.2892	321	0		805	22959	243720	344048	136122	149531	26.2892
14.8858	1	1019388	1	1514535	1	1742046	1	1	534497		1	1	1	1	1	1	14.8858	100	0		1173645	1134	1	6119	1	1	196817	14.8858	100	0		1	1	1	1	1	950356	158394	14.8858	100	0		1	5067	1	1	1	1014.2	14.8858
13.2083	62377	1	57955	138705	94857	118333	252366	89547	101768		502457	201711	1	151508	106955	192526	13.2083	73	0		145975	927949	1	35734	124397	1	205676	13.2083	73	0		1	187733	103344	163637	43608	147638	107660	13.2083	73	0		330556	337834	233933	220882	220872	268815	13.2083
14.2742	1	4209627	1	1	1	1	1	1	526204		1	1	1	1	736590	147319	14.2742	73	0		1	35179	516131	1	1	1	91885.7	14.2742	73	0		1	1	1	863875	1	1	143980	14.2742	73	0		4939	1	1	1	1	988.6	14.2742
18.2517	580387	1	1	1208638	1	1	1	922315	338918		90464	1	720837	1	1	162261	18.2517	75	0		1	7205	785701	1	1	1	132152	18.2517	75	0		1	1	1	605627	1	532480	189685	18.2517	75	0		31404	213858	1	1	1	49053	18.2517
15.805	168999	172688	226219	79722	24351	123720	272333	364738	179096		152370	172862	268487	167578	97177	171695	15.805	246	0		265320	16759	260843	117153	255419	248744	194040	15.805	246	0		304867	321830	52039	197080	85922	366062	221300	15.805	246	0		1	244962	395627	98800	119231	171724	15.805
22.8867	1048106	1	1	258747	1	385965	200960	1	236723		98698	422069	1	1	329991	170152	22.8867	73	0		380367	1	1	456510	563772	1	233442	22.8867	73	0		1	102642	1	196152	1	1	49799.7	22.8867	73	0		1	312356	1	479435	273363	213031	22.8867
22.2625	120075	188401	226891	255808	1	356098	294155	1	180179		845447	1	123530	115764	1	216949	22.2625	101	0		221877	1	146488	277341	280445	1	154359	22.2625	101	0		1	256272	303595	1	1	1	93311.8	22.2625	101	0		1	1	289261	408752	1	139603	22.2625
14.7867	96556	127991	175703	225628	200693	274214	280359	154931	192009		164478	178915	136025	117260	129699	145275	14.7867	149	0		153413	31441	185010	187717	200699	97992	142712	14.7867	149	0		120193	214656	248439	179863	174129	100745	173004	14.7867	149	0		10188	325646	210474	263102	270251	215932	14.7867
18.7758	1	160344	217846	1	182114	350603	1	1	113864		386912	274652	164295	148291	205698	235970	18.7758	72	0		201974	124887	172999	176232	256588	121400	175680	18.7758	72	0		212909	251979	293278	1	260147	129062	191229	18.7758	72	0		18362	396981	1	337649	1	150599	18.7758
11.08	138422	1	1	66474	1	91596	77787	117197	61434.9		1	44251	207770	127222	59317	87712.2	11.08	73	0		1	541560	55667	58460	131469	1	131193	11.08	73	0		270494	181231	70807	287957	1	840084	275096	11.08	73	0		330274	115694	1	52061	56992	111004	11.08
17.0683	289529	339256	128541	138890	40867	196436	102775	257972	186783		31766	232656	84826	48780	126786	104963	17.0683	103	0		359073	1	100643	98342	218168	76118	142058	17.0683	103	0		521038	99088	32164	541125	59243	389242	273650	17.0683	103	0		1850	89580	124558	302888	64637	116703	17.0683
19.4217	74127	86465	1	1	557630	138570	81014	1	117226		41799	1	479926	292099	111478	185061	19.4217	117	0		386936	1	1	787177	1	246639	236792	19.4217	117	0		107386	1	444328	1	1	1	91953	19.4217	117	0		1	1044459	1	1105186	56558	441241	19.4217
19.3567	60746	87324	391748	1	271782	1	1	260748	134044		1	108490	305460	903097	88894	281188	19.3567	170	0		229242	1	335248	247302	181475	196305	198262	19.3567	170	0		500933	1	1	1	118505	173944	132231	19.3567	170	0		1	815542	334516	632952	1	356602	19.3567
10.4033	146365	162949	182532	225402	210431	294835	276891	184328	210467		614699	230731	154639	152810	172953	265166	10.4033	128	0		1	1	1	228704	219901	135385	97332.2	10.4033	128	-113134		1	226321	1	1	209444	1	72628.2	10.4033	128	72628.2		4917	328692	227822	285270	307285	230797	10.4033
18.1083	132733	182032	190763	237202	239733	185475	1	197229	170646		359	245764	158750	173793	210786	157890	18.1083	64	0		217833	1	189386	222573	273057	70485	162222	18.1083	64	0		184300	139620	87868	195595	254264	214446	179349	18.1083	64	0		1	133692	254939	300889	318363	201577	18.1083
26.2958	107213	152802	129094	193211	211241	307880	273139	129064	187956		231362	230580	107163	1	178379	149497	26.2958	101	0		31931	9759	169783	237179	181326	81435	118569	26.2958	101	0		182374	217685	188706	144304	193139	110379	172764	26.2958	101	0		1	33727	217621	317481	181658	150098	26.2958
25.9808	199455	211380	268900	137105	39465	281293	194813	250889	197912		88164	320923	238548	1	2975	130122	25.9808	149	0		21603	5780	204179	236811	33987	148275	108439	25.9808	149	0		237912	307306	364750	303681	195869	5150	235778	25.9808	149	0		669	10689	331469	62540	148310	110735	25.9808
17.4675	1	1	1	1	228754	399342	350277	254861	154155		308059	286804	1	1	186509	156275	17.4675	101	0		245734	84876	1	346635	132614	103643	152250	17.4675	101	0		1	1	245594	1	1	161004	67767	17.4675	101	0		1	1	293296	1	449178	148495	17.4675
22.4067	39542	40603	1	1	378428	207594	240255	1	113303		263338	242349	123557	1	112000	148249	22.4067	103	0		48202	28085	61293	293727	1	1	71884.8	22.4067	103	0		1	355363	815553	1	1	1	195153	22.4067	103	0		8006	229295	357436	729213	304864	325763	22.4067
19.4367	161083	212532	1	1	226613	438145	300951	1	167416		180930	384644	200804	1	259281	205132	19.4367	72	0		242534	1	1	301138	1	106417	108349	19.4367	72	0		270516	1	291484	1	311975	184398	176396	19.4367	72	0		9803	383642	1	432007	261607	217412	19.4367
10.3433	110930	125668	137008	168573	162039	261364	209373	130452	163176		547219	170253	116284	121840	139268	218973	10.3433	72	0		132694	312799	137460	172998	162291	1	153040	10.3433	72	0		127701	184695	1	139747	163096	1	102540	10.3433	72	0		13734	1	174226	250700	228466	133425	10.3433
18.3742	1	1	1	1400970	1	1	1	1	175122		1	1	1	1032998	1	206600	18.3742	147	0		1481610	1	1	1	1	1	246936	18.3742	147	0		1	1	1	1	1	1	1	18.3742	147	0		1	1	1	1	1	1	18.3742
20.8983	1	1	1	1	270723	1	1	1	33841.2		1	1	1	1	1	1	20.8983	100	0		1	1	1	1	1	2500697	416784	20.8983	100	0		1	4341	1	1	1	3363099	561241	20.8983	100	0		1	1	1606	1	1	322	20.8983
19.555	71708	139771	150565	185096	804917	97875	57181	146232	206668		95462	199900	110209	62639	59651	105572	19.555	75	0		209101	1	163308	555609	349523	133230	235129	19.555	75	0		167159	153914	645434	99840	230806	71536	228115	19.555	75	0		1	1	131705	362366	128428	124500	19.555
18.2067	1	547925	1	718473	1	1	1	556309	227839		9146	1	496182	469787	563713	307766	18.2067	148	0		1	1	551819	1	1	471661	170581	18.2067	148	0		1	1	1	1	1	455729	75955.7	18.2067	148	0		1	1	1	1	1	1	18.2067
26.1742	458122	1	782864	23540	1	28906	1	762657	257012		1	1	689510	522719	1	242446	26.1742	75	0		1903	1	1	1	1	359140	60174.5	26.1742	75	0		1	1	1026615	779873	1	105587	318680	26.1742	75	0		1	1250	1	1	1	250.8	26.1742
22.325	697295	1	1	1	1	1	1	751732	181129		1	1	1	1	1	1	22.325	133	0		807115	1	1	1112371	1	1	319915	22.325	133	0		770941	1	1	935432	972293	1	446445	22.325	133	0		1	1	1	1	1	1	22.325
24.5167	309700	1	1	1	1	1	133372	1	55384.8		1	231147	277391	1	294814	160671	24.5167	73	0		1	13420	333891	240793	1	751359	223244	24.5167	73	0		627345	246102	102232	381747	90756	443545	315288	24.5167	73	315288		1	1	365301	1	131069	99274.6	24.5167
8.80583	5186	1	3105	1	1	2995	1	8776	2508.25		7554	6231	9890	1	8628	6460.8	8.80583	207	0		12505	1	6980	9627	9478	1	6432	8.80583	207	0		6654	678275	1190	6411	3979	1	116085	8.80583	207	0		3125019	765031	567377	4405	747085	1.04178e+06	8.80583
10.685	72867	79417	77698	109377	100667	134002	129677	89993	99212.2		341945	98367	73000	69064	86397	133755	10.685	70	0		84555	1207231	82607	111559	108194	73508	277942	10.685	70	0		76204	109299	1717	97937	107878	1	65506	10.685	70	0		919597	164558	109432	144946	139413	295589	10.685
22.5025	664466	670271	1	1	1	1	1	1	166843		1	1	663785	654779	1	263713	22.5025	74	0		1	1	756661	1	1	507181	210641	22.5025	74	0		696340	1	1	1	1	637634	222330	22.5025	74	0		75866	1	1	1	1	15174	22.5025
18.1808	1	268892	286640	385376	199600	1	77725	288014	188281		12976	246015	249745	1	244639	150675	18.1808	176	0		294220	1	266585	151061	283767	1	165939	18.1808	176	0		270058	130775	34610	283323	300218	227624	207768	18.1808	176	0		1	1	299171	1	224437	104722	18.1808
10.375	128068	158353	169982	199766	209418	297132	1	157423	165018		633586	205940	145489	147509	164452	259395	10.375	131	0		1	224022	1	1	1	126486	58418.7	10.375	131	-106599		159575	204912	8470	1	199988	1	95491.2	10.375	131	0		1	317976	1	284518	290273	178554	10.375
14.0508	100849	145304	167094	234130	167831	277780	128089	163192	173034		53114	221561	158055	128596	163297	144925	14.0508	121	0		183843	8214	162986	229510	226538	90575	150278	14.0508	121	0		162159	233942	134615	188197	212107	100472	171915	14.0508	121	0		4176	276895	230919	1	291736	160745	14.0508
26.6367	1	75561	1	115175	175850	191832	211408	1	96228.6		1	400033	1	1	336415	147290	26.6367	147	0		15579	1	1	1	1	1	2597.33	26.6367	147	-93631.3		1	347170	1	1	175032	199796	120334	26.6367	147	0		1	21710	330121	608501	133139	218694	26.6367
14.7825	87769	104982	155486	203776	185975	244374	248273	145168	171975		168145	177884	130919	101815	127610	141275	14.7825	102	0		139384	41102	164140	192226	205711	79197	136960	14.7825	102	0		104285	192193	243195	173292	172130	1	147516	14.7825	102	0		2012	313811	225751	251035	259496	210421	14.7825
37.135	689129	31307	451370	2905	17540	305356	42473	175943	214503		2997	280203	930518	799315	157927	434192	37.135	73	0		18852	1019	78661	1	49834	198980	57891.2	37.135	73	0		351221	271162	260609	288396	98760	1	211692	37.135	73	0		1330	532	52557	72656	5859	26586.8	37.135
18.0767	653289	594183	1	1	1	1	1	1	155935		9048	1	1	636598	1	129130	18.0767	74	0		771741	691	1	1	441438	490632	284084	18.0767	74	0		1	1	1	1	1	733619	122271	18.0767	74	0		321	1	1	1	1	65	18.0767
18.3375	121338	117984	135660	266245	121009	235578	407561	184500	198734		64407	106287	126610	147244	208126	130535	18.3375	133	0		295294	13023	147659	104115	107247	492633	193328	18.3375	133	0		123040	332223	180132	107305	90646	143493	162806	18.3375	133	0		26805	243308	190396	89682	179123	145863	18.3375
17.4725	72995	105052	166515	193593	96123	243204	225380	181055	160490		258134	207613	1	91467	1	111443	17.4725	60	0		162171	68935	144320	217974	142387	1	122631	17.4725	60	0		193626	298414	169367	139053	207606	73789	180309	17.4725	60	0		1	218486	240478	179572	310025	189712	17.4725
22.2992	179639	172407	269981	342790	1	487495	1	1	181539		2366286	398826	1	1	1	553023	22.2992	75	0		1	1	1	1	1	1	1	22.2992	75	-181538		267029	1	1	1	1	1	44505.7	22.2992	75	0		1	724551	667214	1	1	278354	22.2992
8.9375	8439	168475	130839	129012	153473	122830	7896	192217	114148		259562	272669	304394	259886	243412	267985	8.9375	166	153837		420880	16838	211503	262610	315096	141802	228122	8.9375	166	0		298470	1	843	253897	140556	296540	165051	8.9375	166	0		1	233990	1	184806	1	83759.8	8.9375
18.2583	1	1	295389	1	1	146446	1	417625	107433		1	258886	1	593562	1	170490	18.2583	74	0		1	1	1	203274	1	575279	129760	18.2583	74	0		395288	194730	72534	1	311389	597797	261956	18.2583	74	0		1182	162457	285119	224114	1	134575	18.2583
22.455	1	33783	126799	476179	458503	1	1	1	136908		1	356357	1	1	525353	176343	22.455	268	0		721613	1	1	1	400372	1	186998	22.455	268	0		69983	1	1	734664	1553149	1	392966	22.455	268	0		1	1	1	1	1	1	22.455
14.02	239373	213514	129252	130402	389855	178052	230624	215987	215882		94542	205301	174614	216558	228715	183946	14.02	102	0		82725	45647	313345	31576	119273	426713	169880	14.02	102	0		123985	220417	26770	131640	156936	118004	129625	14.02	102	0		22781	92151	224361	167634	133150	128015	14.02
17.4567	152036	156181	188950	203848	234436	201987	172065	160723	183778		135448	141313	187104	166294	200989	166230	17.4567	291	0		128519	28238	199725	219220	60515	162078	133049	17.4567	291	0		106937	233409	115009	92087	226363	166922	156788	17.4567	291	0		1	73915	145810	97061	240230	111403	17.4567
18.255	1	759441	1	1	1	235987	300366	605380	237647		1	1	1	1	1	1	18.255	75	0		812806	1	1	1	586423	1	233206	18.255	75	0		599021	338195	121420	1	1	1	176440	18.255	75	0		1	1	1	349304	1	69861.6	18.255
18.7742	1	248018	1	1	190483	519075	1	1	119698		327017	386445	1	1	295538	201800	18.7742	131	0		1	106086	182313	178055	1	1	77742.8	18.7742	131	0		297180	315465	1	1	385290	177365	195884	18.7742	131	0		3717	518436	1	358232	1	176077	18.7742
26.6375	1	91357	1	120684	188314	199434	231138	1	103866		92057	365809	1	1	321922	155958	26.6375	205	0		26690	167	225194	140379	121370	1	85633.5	26.6375	205	0		139591	331804	1	1	187775	200598	143295	26.6375	205	0		1	19853	333001	633554	147458	226773	26.6375
18.7925	176580	182826	199120	224947	87882	272598	307399	152749	200513		135432	196037	120945	114771	193265	152090	18.7925	234	0		182473	34823	1	79690	217509	130773	107545	18.7925	234	-92967.8		184254	155040	212436	208138	208503	179528	191316	18.7925	234	0		1	1	257591	163575	282141	140662	18.7925
21.2492	1	272065	399287	352645	249985	50943	431305	1	219529		1154	64054	277385	129263	219287	138229	21.2492	101	0		177764	1	173946	65217	73807	163408	109024	21.2492	101	0		358845	44606	22065	80949	435076	157061	183100	21.2492	101	0		1	15410	21108	66085	353201	91161	21.2492
9.06333	1	1	68971	147000	1	229292	1	1	55658.5		1	394171	154667	1	40328	117834	9.06333	73	0		215800	414821	275877	18595	459612	1	230784	9.06333	73	175126		196281	209991	1	481026	143046	153900	197374	9.06333	73	0		1	246008	96773	730407	243952	263428	9.06333
22.37	143845	1	128914	1	1	332674	462352	1	133474		1	171352	1	1	1	34271.2	22.37	132	0		126109	1	1	401639	173002	1	116792	22.37	132	0		166203	992091	139568	1	1	146010	240646	22.37	132	0		1	410956	1	312096	654199	275451	22.37
8.7825	1	134091	148071	129817	130554	157910	203098	160796	133042		398510	281088	239968	185635	199834	261007	8.7825	149	127965		275399	200365	195958	274204	309925	1	209309	8.7825	149	0		273034	1	1	273980	195105	197157	156546	8.7825	149	0		3269	1	1	220999	9112	46676.4	8.7825
26.3042	114497	129553	131359	165575	190787	283649	254683	127058	174645		205775	218367	112137	1	171206	141497	26.3042	130	0		27430	8146	166529	219757	162843	83844	111425	26.3042	130	0		167541	218902	165839	1	172389	115390	140010	26.3042	130	0		1	30192	223037	316569	161783	146316	26.3042
22.3133	1	1	1	1	1	1	1	1	1		1	1274133	1	1	1	254827	22.3133	100	0		1	1	1030308	1	1	1	171719	22.3133	100	0		1	1	1	1177654	1	819995	332942	22.3133	100	0		2892	1	1	1	1	579.2	22.3133
22.4667	659689	707966	1	1	1	1	1	745938	264200		1	1	701101	1	1	140221	22.4667	327	0		1	1	792785	1	1	630960	237292	22.4667	327	0		735677	1	1	1	1	1	122614	22.4667	327	0		1	1	1	1	1	1	22.4667
25.8558	1	183323	269682	62394	304252	54509	148722	114382	142158		1	94041	134051	75344	88319	78351.2	25.8558	73	0		67811	56812	1	286881	105580	513502	171764	25.8558	73	0		1	109025	434556	1	83860	231345	143131	25.8558	73	0		18166	56844	130217	1134145	314138	330702	25.8558
18.785	140993	158695	186726	224178	91086	275996	287115	158059	190356		142628	202875	120498	115187	167911	149820	18.785	177	0		178785	36909	1	82884	217161	125899	106940	18.785	177	0		163083	159085	221182	196606	210871	140756	181930	18.785	177	0		1	1	253592	173519	293078	144038	18.785
8.245	143003	247880	272094	57581	193712	153543	1	234639	162807		516257	266401	235471	243259	214142	295106	8.245	79	0		226980	1	222811	343272	267730	1	176799	8.245	79	0		281073	1	1	1	269982	293606	140777	8.245	79	0		1	1	1	371152	1	74231.2	8.245
20.9867	187728	138786	127515	153646	577078	39113	82653	177929	185556		19871	162641	183257	197354	178823	148389	20.9867	154	0		409594	1	139562	278675	123993	370120	220324	20.9867	154	0		168117	92673	136445	171373	95875	101378	127644	20.9867	154	0		1	175600	131772	281389	81272	134007	20.9867
21.8858	1	1	1	1	1	1	530629	1	66329.5		1	1	1	1	1	1	21.8858	73	0		1	74754	1	1	1	835415	151696	21.8858	73	0		1	1	1	1	1	513799	85634	21.8858	73	0		1	1	1	1	1545128	309026	21.8858
12.035	164604	70618	217788	191673	78478	79919	200310	68293	133960		1	268285	177396	237873	239711	184653	12.035	147	0		244184	47876	170308	205801	1	246150	152387	12.035	147	0		200239	251257	77303	1	167803	289272	164312	12.035	147	0		30998	206005	267183	82424	171917	151705	12.035
21.3708	148882	163553	153743	238991	179552	351340	211149	184564	203972		117	186669	146493	137186	167227	127538	21.3708	131	0		162052	1	182815	205200	157922	130406	139733	21.3708	131	0		116782	190693	252497	122516	181179	137071	166790	21.3708	131	0		1	192701	184321	123766	166748	133507	21.3708
28.3683	422594	373158	271407	68704	600743	33311	182458	251371	275468		19669	1	1	1	78791	19692.6	28.3683	73	-255776		69886	39514	91501	1	81937	741751	170765	28.3683	73	0		207898	148356	382165	164954	116536	1	169985	28.3683	73	0		1	178792	304513	80757	45389	121890	28.3683
18.1792	1	339524	359537	1	374081	1	137799	1	151368		1	365226	336902	1	1	140426	18.1792	255	0		1	1	385291	1	425982	1	135213	18.1792	255	0		387673	86083	1	382079	389948	1	207631	18.1792	255	0		1	1	386999	1	359376	149276	18.1792
25.4342	174108	134805	1	62152	93355	80139	36198	156171	92116.1		1	376369	568670	1	1	189008	25.4342	73	0		82698	1	237559	210140	109942	371753	168682	25.4342	73	0		368799	370014	1	540041	186117	1	244162	25.4342	73	0		307315	1	250479	139786	97524	159021	25.4342
26.08	1	1	1	1	9709	1	1	1	1214.5		1	1	1	1645757	2054374	740027	26.08	204	0		1884	1	1	1	4748	28935	5928.33	26.08	204	0		1	1	1	1	1	1767270	294546	26.08	204	0		1	746	1	12753	14794	5659	26.08
22.5208	1173706	939494	13707	1	1	1	1	59183	273262		1	1	1	1383197	1	276640	22.5208	268	0		1	1	1	710	1	848617	141555	22.5208	268	0		1	1	1696	1	1	1100545	183708	22.5208	268	0		1	1	1	1	1	1	22.5208
20.0975	1	1	110254	158038	1	264276	375343	123616	128941		45806	165808	213838	254216	1	135934	20.0975	147	0		1294292	1	1	1	245572	248826	298116	20.0975	147	0		244624	169032	48238	195197	84897	1	123665	20.0975	147	0		1563	1	140663	57333	150550	70022	20.0975
26.1817	511908	1	854670	4195	1	1	1	1	171347		1	1	699242	514509	1	242751	26.1817	74	0		2188	399	1	1	1	423313	70983.8	26.1817	74	0		1	8771	1100196	811817	1	1	320131	26.1817	74	0		1416	3973	14446	1	4840	4935.2	26.1817
22.4358	1	1	250639	316855	289663	327050	351190	1	191925		1	305596	1	203776	249504	151776	22.4358	175	0		245649	1	235613	1	305074	1	131056	22.4358	175	0		1	1	37383	287457	298295	1	103856	22.4358	175	0		1	1	300328	395114	393882	217865	22.4358
11.545	56740	1	1	1	85456	177637	343274	1	82888.9		634768	321469	66662	97416	1	224063	11.545	73	0		1	769339	141840	1	279132	1	198386	11.545	73	0		1	191877	187635	222091	94838	1	116074	11.545	73	0		334822	156888	1	362954	204458	211825	11.545
29.8808	1	1	1	1	1	1	1	1	1		604448	1	1	1	1	120890	29.8808	73	0		236	1	1	3139591	1	1	523305	29.8808	73	0		12368	1	1	1	1	1223929	206050	29.8808	73	0		1	1	1	1	4513	903.4	29.8808
10.3825	1	1	1	312122	304945	479542	1	1	137077		995260	322263	1	1	1	263505	10.3825	86	0		258167	1	1	337148	320287	1	152601	10.3825	86	0		1	334592	4389	263196	1	1	100363	10.3825	86	0		1	1	297276	456289	1	150714	10.3825
17.055	240719	380126	163564	165354	14087	243720	140449	235554	197947		17558	143272	31064	28266	186805	81393	17.055	71	0		253046	1	13244	10969	100196	57413	72478.2	17.055	71	-125468		402044	92116	35443	442322	39061	337226	224702	17.055	71	0		1	97700	183402	83013	69642	86751.6	17.055
8.71583	1	55955	40306	201031	26497	87248	97603	146603	81905.5		175582	256731	161193	153196	138804	177101	8.71583	89	95195.7		594627	1	148392	79654	207421	505526	255937	8.71583	89	0		224174	78882	1	246545	85627	190532	137627	8.71583	89	0		51920	239253	66151	240823	58802	131390	8.71583
11.2958	1	1	1	1	1	1	1	1	1		1	1	1	1	1	1	11.2958	73	#DIV/0!		1	1	173568	185370	242966	1	100318	11.2958	73	100317		1	1	209062	1	1	4530527	789932	11.2958	73	0		1	1	1	1	1	1	11.2958
22.3517	1	190297	218736	261537	243971	320983	1	197984	179189		1	1	185611	175518	202851	112796	22.3517	160	0		208117	1	207461	290398	264862	1	161807	22.3517	160	0		1	266782	298713	1	246822	175630	164658	22.3517	160	0		1	435280	1	1	346122	156281	22.3517
9.0775	1	96089	110960	109758	16003	148181	124647	206790	101554		333332	266656	166637	1	65051	166335	9.0775	89	0		267630	88585	222659	98231	341106	126636	190808	9.0775	89	0		308927	74691	1	319029	158390	1	143506	9.0775	89	0		2839	161971	52997	519579	89800	165437	9.0775
19.1175	1	1	1	417171	457574	1	356713	406335	204725		279697	1	335540	266831	1	176414	19.1175	73	0		1	175634	229738	1	623161	1	171423	19.1175	73	0		1	1	1	244709	1	1	40785.7	19.1175	73	0		1	1	1	449628	224969	134920	19.1175
10.7342	143202	116209	169141	195726	203481	170598	234553	137955	171358		534584	174864	146825	115065	85627	211393	10.7342	79	0		146109	1	99620	169377	88424	168521	112009	10.7342	79	0		182048	164295	1	151661	134278	1	105381	10.7342	79	0		1	167164	183629	209328	282479	168520	10.7342
23.7542	97484	150004	109271	125664	161031	63429	75665	144451	115875		1	240219	317028	193852	232840	196788	23.7542	73	0		133427	1	96443	194985	156097	402940	163982	23.7542	73	0		188818	193928	620724	199220	53972	254536	251866	23.7542	73	0		2969	45364	265001	185233	97432	119200	23.7542
9.64417	1	152188	1	221014	1	1	1	1	46651		1	1	557069	1	1	111415	9.64417	73	0		824739	1	1	1	1	761828	264428	9.64417	73	0		1	1	1042608	1	1	691419	289005	9.64417	73	0		1	1	414739	1	1	82948.6	9.64417
17.4658	1	178848	209135	242595	1	281626	245912	188610	168341		208996	205243	1	1	139617	110772	17.4658	149	0		172696	48871	199387	260868	91730	1	128926	17.4658	149	0		1	251816	169528	1	249131	120338	131802	17.4658	149	0		1	1	201162	1	319567	104146	17.4658
14.9192	1	1	1	1	1	1	13234	1	1655.12		1	1	1	1	1	1	14.9192	73	0		33211	22058	1	1	1	4895208	825080	14.9192	73	0		1	1	1	1	1	1	1	14.9192	73	0		179	1	1	1	1	36.6	14.9192
10.41	1	1	286285	1	331477	433954	428007	290523	221281		1	360629	1	1	1	72126.6	10.41	86	0		1	1	1	355431	340670	1	116018	10.41	86	0		1	1	1	1	323541	1	53924.3	10.41	86	0		15671	521517	1	1	453528	198144	10.41
19.93	1	842296	1	1	115407	314521	1	1	159029		124832	499500	1	1	814330	287733	19.93	73	0		1	1	1	1	57058	1	9510.5	19.93	73	0		1	1	94852	1	490589	1383528	328162	19.93	73	0		1	1	1	1	1	1	19.93
9.81	89206	244970	157882	200350	156499	121001	210742	143829	165560		128092	143616	104319	170112	136815	136591	9.81	75	0		234619	454813	1	1	104680	207212	166888	9.81	75	0		123818	164660	52039	82272	1	1	70465.2	9.81	75	70465.2		163631	270026	145633	94649	227737	180335	9.81
22.3375	200837	1	239262	298381	1	349429	1	218919	163354		1	288177	1	1	233535	104343	22.3375	172	0		1	1	238548	309908	293661	167819	168323	22.3375	172	0		219751	297356	312375	1	1	195037	170754	22.3375	172	0		79	467856	1	411658	1	175919	22.3375
19.4258	1	1	1	1	529076	995159	1	1	190530		342194	1	377008	1	1	143841	19.4258	157	0		1	1	1	1	304625	476941	130262	19.4258	157	0		1	1	1	1	1	691474	115246	19.4258	157	0		1	1	1	1	1	1	19.4258
14.7025	11892	46775	63312	34684	93994	42825	40860	46081	47552.9		794115	230683	158724	112924	292645	317818	14.7025	130	270265		123597	246475	90027	302186	178621	1	156818	14.7025	130	109265		105845	134559	248078	184714	131379	228726	172217	14.7025	130	172217		3085	94458	42724	110132	92794	68638.6	14.7025
14.1417	1	1666104	1	1	1	1	1	1	208264		1	1	1	1	1	1	14.1417	299	0		1872122	1	1	1	1	1	312021	14.1417	299	0		1	1	1	1	1	1	1	14.1417	299	0		1	1	1	1	1	1	14.1417
18.0383	764100	1	1	804744	1	1	1	397937	245848		23130	1	508306	645837	1	235455	18.0383	75	0		1	1	1	1	1	524072	87346.2	18.0383	75	0		1	1	1	1	1	1	1	18.0383	75	0		1	1	1	1	360891	72179	18.0383
19.7325	11084	17107	8038	1	1	5990	1	16816	7379.75		2616	43761	57854	1	19821	24810.6	19.7325	75	0		1	1875	39769	1	1	1	6941.33	19.7325	75	0		52489	30293	1	1	47420	1	21700.8	19.7325	75	0		4647051	144745	3129	1	6172	960220	19.7325
21.2533	1	228283	282180	295364	267651	81771	380813	1	192008		1	92177	174161	159394	203485	125844	21.2533	72	0		182804	1	189332	98057	101682	104180	112676	21.2533	72	0		255485	71229	34188	101850	332876	134452	155013	21.2533	72	0		9547	19648	1	96540	348047	94756.6	21.2533
22.4208	1	1	1	465130	416648	1	1	345086	153359		1	441219	326905	308868	361255	287650	22.4208	238	0		359364	1	1	1	440676	1	133341	22.4208	238	0		338244	1	1	403612	421844	1	193950	22.4208	238	0		1	1	1	1	1	1	22.4208
18.0917	377954	479765	1	1	546684	277888	1	1	210287		1	558322	1	305509	1	172767	18.0917	148	0		1	236	1	304237	1	1	50746.2	18.0917	148	0		1	189637	82414	1	1	1	45342.5	18.0917	148	0		1	151809	1	423062	555122	225999	18.0917
19.4458	86229	90310	176336	1	143969	290113	180931	176787	143084		98012	268324	125329	1	131834	124700	19.4458	61	0		112823	1	113078	226995	1	1	75483.2	19.4458	61	0		198332	227281	239794	193110	219295	85653	193911	19.4458	61	0		1	278962	221753	312669	157658	194209	19.4458
8.05333	18931	210798	212549	1	209845	1	178705	225391	132028		553432	239719	211252	223304	355	245612	8.05333	103	0		1	1	260441	314463	293042	126300	165708	8.05333	103	0		206034	14488	1	237349	1	228990	114477	8.05333	103	0		1	1080	20239	265102	24516	62187.6	8.05333
10.5667	60418	1	1	103719	49226	148853	1	113349	59446		1	81434	1	10393	66572	31680.2	10.5667	147	0		1	1	1	178445	1	1	29741.7	10.5667	147	0		13286	1	1300938	111479	1	1965760	565244	10.5667	147	0		1	1	1	1	59621	11925	10.5667
18.155	228587	287985	340520	1	322387	1	129845	328360	204711		25095	353449	1	1	309002	137510	18.155	117	0		1	1	301872	226763	1	1	88106.5	18.155	117	0		1	186321	51257	1	387479	1	104177	18.155	117	0		1	1	408794	1	334072	148574	18.155
8.69	8305	9594	9781	1	12085	10102	19785	1	8706.75		33594	1	1	1	1	6719.6	8.69	174	0		6733	47747	392	1	1	1	9145.83	8.69	174	0		1	1228321	1248355	1	1	1	412780	8.69	174	0		511717	1	911062	16726	877265	463354	8.69
18.3733	1	157209	121739	244575	103441	171955	286273	174271	157433		45625	105247	128364	177578	176423	126647	18.3733	148	0		248854	14699	167986	71963	117660	430633	175299	18.3733	148	0		139285	224178	121366	114472	93695	1	115500	18.3733	148	0		33755	172342	151908	84185	159875	120413	18.3733
21.9817	444905	463803	1	1	91054	1	1	1	124971		2200	253747	495079	699025	240865	338183	21.9817	147	0		1	1	1	1	1	552923	92154.7	21.9817	147	0		1	1	1	497639	1	593119	181794	21.9817	147	0		3523	1	1	154530	1	31611.2	21.9817
21.9583	1	1	275100	176838	1	126761	1	330513	113652		38946	1	1	1	1	7790	21.9583	147	0		971596	1	526267	68355	67663	1	272314	21.9583	147	0		479040	244282	110230	1	320247	1	192300	21.9583	147	0		6685	59799	762399	1	1	165777	21.9583
22.295	1	1	1	960358	1	1	1	1	120046		1	1	1	1	1	1	22.295	188	0		1	1	1	1	918105	1	153018	22.295	188	0		1	1	1161925	837140	1	1	333178	22.295	188	0		1	1	1	1	1	1	22.295
19.9925	662585	367989	1	1	1	71014	1	1	137699		16739	245167	1	1	367213	125824	19.9925	132	0		1	1	385072	1	1	264887	108327	19.9925	132	0		630661	556048	1842	1	230779	481540	316812	19.9925	132	0		171	268419	1	1	1	53718.6	19.9925
17.0633	221551	328664	117930	121733	29269	174452	93501	205727	161603		23627	152315	60276	34779	130645	80328.4	17.0633	86	0		267326	1	58165	58560	122868	66048	95494.7	17.0633	86	0		375773	76050	31329	404187	43004	324373	209119	17.0633	86	0		1	77123	121170	183707	54024	87205	17.0633
18.7792	1	1	167128	211659	115103	203765	214752	177635	136256		131335	194418	115702	1	1	88291.4	18.7792	102	0		168094	27205	165870	126315	214904	1	117065	18.7792	102	0		160399	132994	173067	171139	188546	1	137691	18.7792	102	0		1	239561	196902	203272	237599	175467	18.7792
21.1433	204603	443987	1	266158	1	127402	1	219167	157665		6800	135865	1	1	339073	96348	21.1433	70	0		370843	86	1	1	154296	1	87538	21.1433	70	0		384949	204530	28878	274569	1	313963	201148	21.1433	70	0		11983	87535	181485	1	1	56201	21.1433
17.0575	221185	336536	143528	139292	10611	215341	124076	208470	174880		16310	133771	16281	28311	173103	73555.2	17.0575	61	0		266142	1	25820	18195	99227	60367	78292	17.0575	61	0		340918	89066	32143	366078	37755	318582	197424	17.0575	61	0		1	82249	167372	94184	62931	81347.4	17.0575
14.1042	146972	135463	231798	269207	324507	1	185419	192939	185788		216519	1	1	138341	170290	105030	14.1042	119	0		1	1	1	1	244460	120246	60785	14.1042	119	-125003		163879	1	387431	228073	301850	1	180206	14.1042	119	0		283	1	1	272711	1	54599.4	14.1042
14.105	149367	20084	158039	150049	331135	159663	153079	144350	158221		196585	183008	137836	100520	1	123590	14.105	206	0		23788	1	90246	198180	90936	56864	76669.2	14.105	206	0		1	141874	386084	167650	191423	1	147839	14.105	206	0		1	194498	209396	268543	180672	170622	14.105
21.2617	1	1	375158	341478	414141	1	414653	1	193179		1	1	280993	1	227047	101609	21.2617	133	0		183914	2176	268256	1	1	222601	112825	21.2617	133	0		341651	58682	27530	99762	427476	1	159184	21.2617	133	0		1	1	1	85707	349377	87017.4	21.2617
22.3392	205370	1	1	1	1	369670	1	221190	99529.4		1	1	229026	1	252626	96331	22.3392	114	0		1	1	256444	322519	305343	1	147385	22.3392	114	0		1	312035	319239	1	1	201769	138841	22.3392	114	0		1	478519	1	1	1	95704.6	22.3392
8.385	91578	136786	55871	1	187085	214574	1	139919	103227		230661	205217	103615	111640	129789	156184	8.385	75	0		128121	1439415	63717	1	1	1	271876	8.385	75	0		55872	5210	1	1	67762	1	21474.5	8.385	75	21474.5		1	24893	1	308293	1	66637.8	8.385
22.9842	1	1	1	153313	83387	1	59057	454804	93820.6		1	1	1	651456	210096	172311	22.9842	73	0		1	1	1	1	1	500051	83342.7	22.9842	73	0		1	139317	1	155640	43264	1	56370.7	22.9842	73	0		17730	1	1	353658	1	74278.2	22.9842
19.38	107861	97473	1	1	671430	1	1	1	109596		1	672572	1	1	110091	156533	19.38	117	0		1	3770	220976	1	803230	1	171330	19.38	117	0		1	1	1	1	723047	166479	148255	19.38	117	0		2803	1313422	1	1	1	263246	19.38
17.4292	206778	238707	273149	339472	327450	1	1	1	173195		1	307434	222516	212985	260618	200711	17.4292	99	0		1	1	259705	1	135167	143180	89675.8	17.4292	99	0		233128	323232	1	192928	342618	229336	220207	17.4292	99	0		2142	179361	1	222218	1	80744.6	17.4292
10.3708	201862	237353	256197	1	1	1	1	247032	117806		1	1	234902	223551	256235	142938	10.3708	86	0		1	378951	1	1	1	210008	98160.5	10.3708	86	0		237777	1	7100	1	302091	6146	92186	10.3708	86	0		2524	5509	1	1	1	1607.2	10.3708
21.3733	147667	166525	148011	222710	1	313808	188188	168196	169388		1	166033	133492	136351	167215	120618	21.3733	130	0		140535	1	178798	186824	143861	1	108337	21.3733	130	0		107435	176491	218283	114464	170698	144773	155357	21.3733	130	0		1	172997	168014	113725	146318	120211	21.3733
22.2483	1	137383	176917	200138	1	277937	232029	1	128051		666628	1	1	95407	1	152408	22.2483	117	0		1	1	118401	221377	219097	85191	107345	22.2483	117	0		112338	205244	235649	1	1	1	92205.7	22.2483	117	0		201	1	233762	322308	1	111255	22.2483
8.07417	119	224645	210772	1	198188	1	154585	223080	126424		491670	225640	224298	223198	1	232961	8.07417	130	0		1	1	254290	318364	294536	131507	166450	8.07417	130	0		210206	18	1	233338	1	232225	112632	8.07417	130	0		1	445	2221	237892	3684	48848.6	8.07417
15.8975	216091	1	58559	133876	1387069	63277	134567	140062	266688		93230	1	75340	1	187526	71219.6	15.8975	75	0		207217	1	1	1	43743	681153	155353	15.8975	75	0		121207	119180	1	34969	70018	60216	67598.5	15.8975	75	0		29978	82456	163754	1	108237	76885.2	15.8975
22.4783	51291	1	1	1	1	1	1	476764	66007.6		1	1	646336	49909	1	139250	22.4783	268	0		1	1	975934	1	1	38755	169116	22.4783	268	0		1576751	1	1	1	1	41993	269791	22.4783	268	0		1	1	1	1	1	1	22.4783
24.0592	50711	340844	743886	122205	188202	538035	61901	1	255723		1	1	1	58007	1	11602.2	24.0592	73	0		1	15041	73554	99666	603242	121833	152223	24.0592	73	0		227662	118124	1	301646	1	234690	147021	24.0592	73	0		1	1	105500	62078	89789	51473.8	24.0592
8.8175	1	133059	139179	137245	108392	159382	174198	137732	123648		388592	178467	140493	139551	129315	195284	8.8175	70	0		145525	192080	169363	213093	195506	90854	167737	8.8175	70	0		145835	1	59403	182404	163233	138024	114817	8.8175	70	0		5942	9640	1	181777	1	39472.2	8.8175
22.5217	232647	225358	125179	201537	199744	1	1	177708	145272		18787	201323	189253	321777	185248	183278	22.5217	102	0		226449	1	268585	1	208013	179079	147021	22.5217	102	0		390643	25024	16372	221884	440449	247210	223597	22.5217	102	0		4264	34487	1	1	1	7750.8	22.5217
15.4675	102071	1	138333	67126	84906	30939	174960	143583	92739.9		1	100879	180190	385560	25347	138395	15.4675	147	0		150416	13395	263858	269742	1	474490	195317	15.4675	147	0		1	219889	704841	2317	96265	93162	186079	15.4675	147	0		22004	119402	185051	174029	111292	122356	15.4675
18.1825	338231	384743	1	497132	1	1	1	398026	202267		5939	1	361564	345324	400336	222633	18.1825	255	0		385698	1	413370	1	1	1	133179	18.1825	255	0		1	1	1	1	1	345435	57573.3	18.1825	255	0		1	1	1	1	1	1	18.1825
22.3333	231153	1	1	1	1	412650	1	251400	111901		1	1	1	241902	1	48381.2	22.3333	131	0		1	1	279531	370366	1	177086	137831	22.3333	131	0		1	346824	364653	1	318804	211251	206922	22.3333	131	0		113	544774	1	1	1	108978	22.3333
19.4192	146532	190138	1	1	92122	354501	224753	1	126006		159868	322249	128280	113092	230684	190835	19.4192	84	0		211536	1	243845	164654	1	81535	116929	19.4192	84	0		225574	1	192426	1	219671	166059	133955	19.4192	84	0		59657	1	1	207313	198125	93019.4	19.4192
20.5033	181985	253246	175113	142995	76849	150847	54929	143952	147490		124009	97412	119635	160690	131780	126705	20.5033	84	0		193870	1	185031	219192	196832	40392	139220	20.5033	84	0		140001	112791	62961	186202	137390	180188	136589	20.5033	84	0		4228	51443	110800	87815	139747	78806.6	20.5033
18.14	135024	156017	169661	221714	187566	1	81822	179870	141459		3818	186143	148767	133112	176194	129607	18.14	131	0		175994	1	173327	116128	210452	1	112650	18.14	131	0		165760	73841	30588	176215	195907	124394	127784	18.14	131	0		603	54563	189073	155503	202493	120447	18.14
22.4242	213793	226903	255146	322257	292103	1	1	249321	194941		1	313355	234656	1	249973	159597	22.4242	172	0		247232	1	258043	1	313746	195530	169092	22.4242	172	0		241894	1	1	285186	300239	212902	173370	22.4242	172	0		1	1	309302	1	1	61861.2	22.4242
26.2567	736347	10817	905928	3476	1	3237	1	1	207476		1	1	774388	1	9962	156871	26.2567	217	0		3440	1	1	1	1	1	574.167	26.2567	217	0		1	7007	1241999	974180	1	14484	372945	26.2567	217	0		3968	3358	10582	1	1	3582	26.2567
12.6342	56774	87270	112005	108381	129220	1	176495	121976	99015.2		171275	174826	156478	108891	133311	148956	12.6342	77	0		126221	78456	133176	192521	212231	120682	143881	12.6342	77	0		148938	189855	141182	167236	96053	108693	141993	12.6342	77	0		28908	212648	198326	123798	168848	146506	12.6342
18.24	626489	1	1	1	1	49236	76380	99238	106418		17702	1	1	664288	1	136399	18.24	153	0		796746	1	1	1	1	634231	238497	18.24	153	0		1	49120	26309	1	1	650983	121069	18.24	153	0		1271	47278	71151	1	1	23940.4	18.24
11.7325	142254	116186	93179	130266	102078	113212	128555	106859	116574		184299	138917	109621	107635	101154	128325	11.7325	74	0		111679	250386	125033	154984	133212	151549	154474	11.7325	74	0		70527	145470	69418	78402	96099	114335	95708.5	11.7325	74	0		167821	167416	132784	97064	155618	144141	11.7325
25.5083	282699	236547	230679	106368	117681	72239	115456	216917	172323		62713	129083	206842	175885	148420	144589	25.5083	73	0		47539	1	282375	221091	9903	1	93485	25.5083	73	0		186919	212651	1	127282	153001	1	113309	25.5083	73	0		1	50975	386614	37278	129795	120933	25.5083
21.4075	90469	94208	1	256684	124254	342373	258419	187021	169179		1	247299	108241	72949	134355	112569	21.4075	61	0		193708	1504	103534	1	1	1	49791.5	21.4075	61	-119387		1	222948	288593	144885	145275	80854	147093	21.4075	61	0		1	261783	218894	167941	228984	175521	21.4075
13.9008	104534	1	146317	54328	239639	65938	162568	70819	105518		1	120803	156518	313849	60752	130385	13.9008	147	0		54917	1	257495	63373	406938	1	130454	13.9008	147	0		1	117493	775836	70078	138826	203836	217678	13.9008	147	0		2918	186293	133969	356675	67996	149570	13.9008
26.2233	435535	1	602418	1	1	1	1	562960	200115		1	1	478303	398171	1	175295	26.2233	133	0		1	1	1	1	1	325112	54186.2	26.2233	133	0		1	1	818557	617933	1	1	239416	26.2233	133	0		4112	1	1	1	1	823.2	26.2233
15.0217	1	1	1	1	1	1	1	1	1		622540	1	1	1	1	124509	15.0217	73	0		1	1	1	1	1	3382105	563685	15.0217	73	0		1	1	1	1	1	1	1	15.0217	73	#DIV/0!		1	1	1	674664	1	134934	15.0217
12.6367	138612	199180	1	1	12084	1	398330	220220	121054		1	340168	168042	150528	189395	169627	12.6367	61	0		1	1	154241	1	341779	130643	104444	12.6367	61	0		162917	1	13133	1	1	144335	53398	12.6367	61	0		10846	520658	1	1	442256	194752	12.6367
29.795	1	1	1	1	192305	1	1	1	24039		1	249543	474244	1	1	144758	29.795	73	0		1	1	577413	1	1	25899	100553	29.795	73	0		1	1	11904	757464	590782	8413	228094	29.795	73	0		1	1	1	1	1	1	29.795
26.2175	599402	1	883502	1	1	1	1	1	185364		1	1	683694	1	1	136740	26.2175	117	0		1	1	1	1	1	454733	75789.7	26.2175	117	0		1	1	1116840	874295	1	1	331856	26.2175	117	0		1	1	1	1	1	1	26.2175
8.21333	1010146	1	1	1	1	72209	1	27980	138792		1	1	1	1	1	1	8.21333	73	0		1	165421	1	1	1	1	27571	8.21333	73	0		1	1	81101	82472	1	9421	28832.8	8.21333	73	0		1023694	391403	34312	1	141753	318233	8.21333
18.1358	145217	195230	235141	1	215780	1	108733	215363	139433		18733	253616	1	1	207517	95973.6	18.1358	101	0		1	1	1	188370	272974	111189	95422.7	18.1358	101	0		210524	168276	49418	248601	275523	155963	184718	18.1358	101	0		1	1	300300	1	265194	113099	18.1358
22.1467	101641	114202	110649	112388	121057	189328	162933	107723	127490		570625	141945	65062	101138	90649	193884	22.1467	64	0		106912	1	93383	141062	147824	43391	88762.2	22.1467	64	0		105145	121487	1	108158	136420	49180	86731.8	22.1467	64	0		628	245861	143372	221103	199209	162035	22.1467
12.6625	1	1	1	1	177483	1	1	4034855	526543		1	1	1	1	1	1	12.6625	147	0		1	1	1	1	1	1	1	12.6625	147	0		1	1	1	1	1	1	1	12.6625	147	0		379829	1	1	1	1	75966.6	12.6625
9.08333	119824	1	20779	182974	1	167781	159327	296211	118362		312030	1	175125	238753	107130	166608	9.08333	73	0		361641	356462	225333	135885	1	1	179887	9.08333	73	0		1	1	1	239556	1	1	39926.8	9.08333	73	0		1	329729	1	436263	1	153199	9.08333
10.4408	1	145768	156342	195334	183416	1	227429	156738	133129		1	198309	129369	144349	1	94405.8	10.4408	72	0		160336	49679	169364	185511	175411	1	123384	10.4408	72	0		162749	195927	5785	171374	179315	1	119192	10.4408	72	0		21534	288987	199992	1	248931	151889	10.4408
21.2583	29794	211939	366001	269738	135591	29378	323143	26097	173960		1239	39151	316693	79272	149823	117236	21.2583	188	0		118297	608	115411	1	1	237099	78569.5	21.2583	188	0		310619	24810	12731	54283	384240	150781	156244	21.2583	188	0		403	1	9666	39979	255941	61198	21.2583
11.9692	149667	390008	481692	45417	27801	119001	35405	236866	185732		62348	68249	75230	60966	158220	85002.6	11.9692	98	0		78172	1	134145	165426	122240	15802	85964.3	11.9692	98	0		311061	124337	5927	70495	103230	412099	171192	11.9692	98	0		1	61366	77928	50642	187818	75551	11.9692
21.4633	1	1	1	1	1836419	1	1	1	229553		15	1	1	1	1	3.8	21.4633	128	0		1	1	1	1	1	1267998	211334	21.4633	128	0		1	1	1	1	1	1	1	21.4633	128	0		117	1	1	1	1	24.2	21.4633
8.80917	1	91535	99801	116763	87759	105735	135664	121205	94807.9		261312	194942	177492	141084	160214	187009	8.80917	117	92200.9		219051	157038	140649	194373	221043	96700	171476	8.80917	117	76667.8		193009	1	20208	198452	132248	148175	115349	8.80917	117	0		222981	202232	16912	146936	20211	121854	8.80917
14.7817	59188	79140	120315	154081	144792	192981	188231	113426	131519		122573	137721	102931	73066	97727	106804	14.7817	88	0		99707	23174	122259	146825	154810	56078	100476	14.7817	88	0		77553	141941	175829	129281	133855	69267	121288	14.7817	88	0		3706	233584	157906	197531	198471	158240	14.7817
20.9858	153098	107845	103046	122382	448538	30187	64513	138121	145966		14420	126996	149708	152098	137843	116213	20.9858	244	0		309182	1	114930	218628	97325	400565	190105	20.9858	244	0		133758	72767	105572	135273	76699	90127	102366	20.9858	244	0		1	136468	103474	219826	63712	104696	20.9858
22.365	1	1	1	1	1	1	558178	1	69773.1		1	1	1	324978	1	64996.4	22.365	328	0		1	1	1	457908	459679	1	152932	22.365	328	0		1	448324	1	1	1	1	74721.5	22.365	328	0		1	1	1	618457	619524	247597	22.365
10.4158	1	1	1	499946	1	1	1	412478	114054		1	518722	1	1	412558	186257	10.4158	148	0		456054	28238	1	1	1	1	80716	10.4158	148	0		1	504322	1	459643	1	1	160662	10.4158	148	0		1	1	525641	1	1	105129	10.4158
19.415	32277	48172	25298	1	1	31372	8455	1	18197.1		1	365895	287267	1	127542	156141	19.415	188	137944		236819	1	85595	459814	453639	1	205978	19.415	188	187781		1	17120	210994	1	418930	103655	125117	19.415	188	0		1	818115	14475	649419	1	296402	19.415
14.2842	1	905677	1	1	1	1	1	1	113210		1	1	1	1	1	1	14.2842	133	0		1004084	816	1	1	1	717632	287089	14.2842	133	0		1	1	1	120011	1	754212	145704	14.2842	133	0		896	1	1	1	1	180	14.2842
21.2742	1	1	516942	430139	1	1	521702	1	183598		1	1	470355	1	1	94071.8	21.2742	233	0		1	1	1	1	1	325543	54258	21.2742	233	0		448810	1	1	1	541719	1	165089	21.2742	233	0		1	1	1	1	429823	85965.4	21.2742
17.4283	204372	120044	107987	104328	61738	107389	1	155342	107650		1	116067	146164	150594	153030	113171	17.4283	129	0		115529	15214	135298	146348	144385	57033	102301	17.4283	129	0		206063	474728	48387	110504	127808	166551	189007	17.4283	129	0		1	275430	299246	105522	1	136040	17.4283
12.6842	1	94024	106520	139560	2436	153085	179016	101570	97026.5		240818	133552	92158	88294	92959	129556	12.6842	150	0		100254	215702	100668	134255	140049	76296	127871	12.6842	150	0		98702	147477	14496	116412	119668	86346	97183.5	12.6842	150	0		4004	227074	152572	135826	190703	142036	12.6842
11.9817	199246	161198	148025	73131	82671	72138	45419	148029	116232		43421	131929	143265	149804	149784	123641	11.9817	116	0		132821	1	342241	105107	102018	106129	131386	11.9817	116	0		370513	66215	4553	142618	196290	736287	252746	11.9817	116	0		9832	18237	55774	72056	54920	42163.8	11.9817
28.7142	233820	35220	83567	29320	100234	36978	31820	78258	78652.1		1	30973	51845	48519	23637	30995	28.7142	73	0		37636	1	62005	1	31346	75820	34468.2	28.7142	73	0		59663	91812	217154	36029	26769	865331	216126	28.7142	73	0		1730997	18618	40073	30399	44536	372925	28.7142
8.7875	53559	97316	108448	95035	94513	113615	147165	117218	103359		288522	214380	184444	136940	148579	194573	8.7875	115	91214.4		202739	166032	140802	199317	238188	94479	173593	8.7875	115	70234.2		207618	1	1138	215587	144027	144478	118808	8.7875	115	0		1	1	18895	160125	23509	40506.2	8.7875
10.2708	1	1	1	1	1	737	12239	1	1622.75		1	104818	87148	1	1	38393.8	10.2708	147	0		1	1681	1	1	1	1	281	10.2708	147	0		1	13177	3191465	1	1	1	534108	10.2708	147	0		1	153894	89508	1	1	48681	10.2708
18.8158	134203	152133	197523	223175	1	270077	258192	201733	179630		1	1	156641	147965	109178	82757.2	18.8158	115	0		165385	35932	1	139582	249198	152516	123769	18.8158	115	0		133038	1	219831	201418	1	100689	109163	18.8158	115	0		1	1	238480	1	304502	108597	18.8158
10.4417	1	137000	144287	168693	171314	1	194171	155621	121386		1	180328	120146	137985	1	87692.2	10.4417	66	0		128675	56640	173579	173631	161412	95093	131505	10.4417	66	0		149410	184299	1	141084	161281	1	106013	10.4417	66	0		1	253659	190572	1	210131	130873	10.4417
10.445	1	1	162079	171770	182121	132987	229706	121669	125042		531954	155769	1	1	1	137545	10.445	79	0		1	376642	1	172729	74435	1	103968	10.445	79	0		1	174970	125462	1	175891	108584	97484.8	10.445	79	0		1	173562	131960	278346	251976	167169	10.445
22.6942	1	1	1	746177	1	1	1	1	93273		1	1	1	1	1	1	22.6942	73	0		1	1	1	1	1	1193110	198852	22.6942	73	0		1219211	1	1	1	1	1	203203	22.6942	73	0		5653	1	105598	793183	1	180887	22.6942
22.1817	144855	1	1	1	242853	1	317113	206325	113894		1	271783	153238	172344	206930	160859	22.1817	101	0		1	1	187163	1	1	91904	46511.8	22.1817	101	0		202323	1	868	222944	254833	118166	133189	22.1817	101	0		1	432065	1	1	373798	161173	22.1817
24.9283	198067	194949	256536	59795	223052	108117	36283	244348	165143		146	89005	219216	186057	237687	146422	24.9283	128	0		104786	1	236823	186521	82209	170980	130220	24.9283	128	0		215167	157356	5419	187804	247487	183481	166119	24.9283	128	0		1	4122	69243	1579	1340	15257	24.9283
17.4258	124293	112319	125030	149059	128148	189536	175975	142405	143346		1	148759	106027	115176	123605	98713.6	17.4258	103	0		118795	32056	124388	167921	84126	49259	96090.8	17.4258	103	-47254.8		132486	244707	110822	100351	156360	121403	144355	17.4258	103	0		1	137270	189059	113381	1	87942.4	17.4258
18.18	1	258470	262029	1	271794	1	95072	1	110921		1	262506	247096	1	1	101921	18.18	256	0		287955	1	282955	1	312007	1	147153	18.18	256	0		285734	59188	1	275668	282473	1	150511	18.18	256	0		1	1	277772	1	257114	106978	18.18
20.0692	1	1	184845	193500	221	16385	202327	414783	126508		26114	1	502646	482602	1	202273	20.0692	132	0		258926	1	1	197584	477356	1	155645	20.0692	132	0		1	1	1	304781	1	1	50797.7	20.0692	132	0		1	15718	532071	136424	234581	183759	20.0692
9.435	1	1	88702	1	5552	159802	139800	1	49232.5		211122	63294	1	1	251607	105205	9.435	66	0		1	428139	64636	105914	74644	6674	113335	9.435	66	0		811522	1	19935	780618	63765	1	279307	9.435	66	0		12265	113012	8147	174333	156522	92855.8	9.435
17.4375	285527	1	1	1	407623	1	1	1	86644.5		1	370581	293344	272919	325563	252482	17.4375	131	0		1	1	344272	1	175606	205890	120962	17.4375	131	0		288906	1	1	246631	1	281188	136121	17.4375	131	0		1	230554	1	280208	1	102153	17.4375
14.0875	83633	107023	152907	1	186513	282022	179725	106804	137328		227871	228929	1	102675	118326	135560	14.0875	61	0		125856	1	1	236177	158692	1	86788	14.0875	61	0		117455	1	224712	148578	229531	1	120046	14.0875	61	0		3695	1	1	251817	1	51103	14.0875
15.5967	126469	283017	92862	239762	112634	101781	174614	210509	167706		1	136733	144316	1	111019	78414	15.5967	73	0		189249	1	143215	141202	64806	101189	106610	15.5967	73	0		1	174041	1	179130	90623	245125	114820	15.5967	73	0		9406	141364	62046	69784	286238	113768	15.5967
17.4667	99556	1	1	1	154994	258955	235931	167057	114562		201781	196038	1	111654	120444	125984	17.4667	102	0		150336	54286	1	230363	86782	70792	98760	17.4667	102	0		1	1	163443	6974	1	100799	45203.2	17.4667	102	0		1	6038	192899	1	291293	98046.4	17.4667
21.2683	29912	181600	266247	247704	145023	38783	296955	36223	155306		1461	52601	252609	82680	158227	109516	21.2683	216	0		130684	1	122884	49854	62405	183416	91540.7	21.2683	216	0		242775	38659	17804	70881	296997	128486	132600	21.2683	216	0		1	7337	16388	54169	262667	68112.4	21.2683
25.9908	131276	132462	172583	83293	22480	171529	117609	159477	123839		53888	205168	156175	112968	165551	138750	25.9908	159	0		12911	3597	126441	143954	20019	96630	67258.7	25.9908	159	0		150290	195367	234576	198884	120100	121613	170138	25.9908	159	0		1	6002	216985	31866	88511	68673	25.9908
19.4358	1	43524	25583	9851	399935	1	8598	14068	62695.1		1	339125	268309	183787	2001	158645	19.4358	202	0		203462	1	82560	429011	1	163972	146501	19.4358	202	0		16183	17609	211238	8691	392686	1	107735	19.4358	202	0		1	789635	14943	604699	4754	282806	19.4358
14.0808	97767	119417	132784	167083	118419	181375	102849	129846	131192		42619	148775	113381	112213	129297	109257	14.0808	315	0		135454	1	118458	144856	159013	94710	108749	14.0808	315	0		128146	156129	103106	148707	148331	1	114070	14.0808	315	0		1	189515	147571	3226	198876	107838	14.0808
14.0258	64340	117733	131783	163580	1	218267	141061	127679	120556		77600	166292	86335	104331	120060	110924	14.0258	72	0		124860	173904	125517	171381	149921	94548	140022	14.0258	72	0		129103	1	137495	142601	160745	71133	106846	14.0258	72	0		88715	242644	1	30531	217821	115942	14.0258
19.385	132898	1	1	1	543126	1	1	1	84503.8		1	573062	1	1	1	114613	19.385	133	0		1	2342	297662	1	631136	1	155190	19.385	133	0		1	1	1	1	593531	187672	130201	19.385	133	0		1	1043882	1	1	1	208777	19.385
19.3317	307104	147587	1	1	216298	1	81468	1	94057.6		1	288747	1	284958	185689	151879	19.3317	61	0		1	1	287241	1	293821	220778	133640	19.3317	61	0		225384	140374	1	1	308067	135041	134811	19.3317	61	0		1	450435	124571	391401	1	193282	19.3317
19.4683	1	1	233290	357233	238088	1	1	244405	134128		1	1	197406	164495	1	72380.8	19.4683	84	0		239485	1	189101	261980	191684	133131	169230	19.4683	84	0		1	337922	1	252212	1	1	98356.3	19.4683	84	0		1	236522	297391	269726	1	160728	19.4683
21.2575	1	199831	300873	254470	205028	40467	303134	1	162976		1	48723	217585	1	164465	86155	21.2575	114	0		123523	1	143619	54852	57885	173390	92211.7	21.2575	114	0		274885	37546	15207	60923	329633	123695	140315	21.2575	114	0		1202	1	1	50065	246166	59487	21.2575
21.29	54192	185972	283821	233928	164548	42156	271698	29090	158176		9680	42365	237356	87291	138565	103051	21.29	174	0		132615	1	112753	60040	56427	193107	92490.5	21.29	174	0		249616	34532	25492	53370	305307	113014	130222	21.29	174	0		1	31162	14879	46908	214378	61465.6	21.29
8.925	76511	88779	74920	116033	1	86055	103930	284659	103861		111083	1	158581	172388	98049	108020	8.925	75	0		212659	319706	174785	1	52744	360485	186730	8.925	75	0		220858	35868	19433	1	77764	85824	73291.3	8.925	75	0		97551	220086	1	94662	45147	91489.4	8.925
8.6425	67444	98129	1	1	21433	15868	1	67735	33826.5		1	1	10650	1	126441	27418.8	8.6425	147	0		1	1	1	11397	7143	1	3090.67	8.6425	147	0		84722	1	2781084	24649	1	1	481743	8.6425	147	0		194879	301406	1	16387	1	102535	8.6425
22.5175	1	503200	1	1	1	1	1	1	62900.9		209452	1	1	388216	1	119534	22.5175	75	0		1	1	585249	1	1	343646	154816	22.5175	75	0		624287	1	1	1	1	218009	140383	22.5175	75	0		248703	1	1	389284	1	127598	22.5175
19.5033	1	1	281704	396355	290888	1	1	297984	158367		1	1	230084	180235	1	82064.4	19.5033	72	0		1	1	236758	336909	260453	137999	162020	19.5033	72	0		1	391066	1	306037	1	1	116184	19.5033	72	0		1	1	366445	1	1	73289.8	19.5033
24.9208	229267	238693	369665	1	321612	1	1	348414	188457		831	1	1	218502	356712	115209	24.9208	102	0		125399	1	305023	257275	1	1	114617	24.9208	102	0		283995	201196	11701	1	357281	202716	176148	24.9208	102	0		1	1	77392	3311	3115	16764	24.9208
11.9767	142026	119530	244876	179722	1	102958	181280	91775	132771		1	246175	1	131860	149770	105561	11.9767	147	0		1	1	164152	213015	1	190306	94579.3	11.9767	147	0		211097	1	40096	1	1	367551	103124	11.9767	147	0		1	211632	1	58367	169038	87807.8	11.9767
19.5508	1	1	1	540954	1	1	1	401945	117863		1	1	1	388446	48697	87429.2	19.5508	147	0		425962	1495	101653	1	1371450	350107	375111	19.5508	147	0		1	1	1	1	1	64196	10700.2	19.5508	147	0		1	98899	1	1	1	19780.6	19.5508
19.4442	1	1	33613	13474	391165	1	12732	18067	58631.8		1	333423	270092	204554	1114	161837	19.4442	218	0		214088	1	1	404529	1	179398	133003	19.4442	218	0		20027	25231	243060	11284	378455	1	113010	19.4442	218	0		1	723719	21276	559769	7582	262469	19.4442
11.2017	1	130021	32456	1	274813	189712	29761	1	82095.8		1	157557	36631	54845	165735	82953.8	11.2017	131	0		90246	613823	219761	206646	238179	71594	240042	11.2017	131	0		182804	155199	2142	184755	151249	1	112692	11.2017	131	0		1	213187	77637	1	238583	105882	11.2017
18.0517	1	300973	1	297128	1	1	1	170180	96035.8		3857	1	200079	280620	1	96911.6	18.0517	153	0		409735	1	1	1	229766	335727	162538	18.0517	153	0		1	1	1	1	1	422512	70419.5	18.0517	153	0		1	1	1	1	109154	21831.6	18.0517
26.195	332359	1	548556	4016	1	5533	1	528073	177318		1	1	433526	324367	9005	153380	26.195	89	0		1638	1	1	1	1	267112	44792.3	26.195	89	0		1	1	711653	519480	1	12666	207300	26.195	89	0		4222	1731	12302	1	1	3651.4	26.195
10.7117	54586	55882	63333	79081	72654	95962	89111	65349	71994.8		225395	81572	58808	58471	58510	96551.2	10.7117	101	0		55580	773584	72294	75285	74052	52820	183936	10.7117	101	0		64917	71928	1	73083	73990	1	47320	10.7117	101	0		578412	103927	72070	96884	102275	190714	10.7117
9.61583	139099	106261	1	79821	106320	71985	1	150825	81789.1		192459	1	258460	213454	225272	177929	9.61583	221	0		383467	1	1	369927	252898	402437	234788	9.61583	221	152999		1	1	582	197180	1	45063	40471.3	9.61583	221	0		1	148338	148862	1	108158	81072	9.61583
14.1133	74391	1	144567	166066	195220	217616	166395	86697	131369		229247	194406	96387	78195	1	119647	14.1133	72	0		1	1	106885	203146	1	62658	62115.3	14.1133	72	0		86928	176123	239611	111658	196310	1	135105	14.1133	72	0		1	1	188854	244979	1	86767.2	14.1133
21.3683	107468	126532	125772	187920	1	257008	155526	134720	136868		1	134204	113067	103719	134548	97107.8	21.3683	114	0		120191	1	143194	154728	116764	100436	105886	21.3683	114	0		94383	140329	180995	91238	146700	116637	128380	21.3683	114	0		1	140446	136766	92283	122286	98356.4	21.3683
9.475	127207	356658	1	185431	27885	1	1	358573	131970		1	7025	44965	31522	1	16702.8	9.475	74	0		107832	109580	6468	1	3706	40229	44636	9.475	74	0		1	1	1	1	1	421536	70256.8	9.475	74	0		1	8579	113286	7374	11089	28065.8	9.475
18.2342	233248	273542	1	445798	1	1	1	378295	166361		21958	1	246599	303167	341867	182718	18.2342	61	0		1	277	321160	1	1	226359	91299.8	18.2342	61	0		399606	1	1	258014	1	1	109604	18.2342	61	0		2458	1	1	1	1	492.4	18.2342
21.42	1	93062	131501	208555	119055	281325	176526	151556	145198		1	161034	93262	1	1	50859.8	21.42	85	0		143091	1	99648	177524	134172	80509	105824	21.42	85	0		96821	161499	217881	100106	137218	81830	132559	21.42	85	0		1	163914	157937	103114	139317	112857	21.42
19.7333	2712	1	17233	1	1	1	221	9051	3652.62		305	1	1	1	1	61.8	19.7333	74	0		3959	5631	1	1	1	1	1599	19.7333	74	0		5623	886	1	240	1	10019	2795	19.7333	74	0		3927460	39417	1	1	1	793376	19.7333
22.2658	1	1	1	446146	1	519033	1	1	120648		1089629	1	1	1	331239	284174	22.2658	328	0		1	1	1	1	1	1	1	22.2658	328	0		1	1	1	1	1	1	1	22.2658	328	0		1	704133	1	1	1	140827	22.2658
22.2583	115311	1	1	1	1	1	236473	1	43973.8		625791	153886	1	107878	1	177511	22.2583	134	0		1	1	133637	214313	211268	1	93203.5	22.2583	134	0		123306	201622	221114	1	151981	1	116338	22.2583	134	0		1	321582	225387	301510	1	169696	22.2583
18.2883	1	441353	370108	1	32313	114260	26907	381183	170766		61281	161168	1	7489	103809	66749.6	18.2883	188	0		1	1	223135	202116	229027	113007	127881	18.2883	188	0		250263	236096	68170	1	303197	1	142955	18.2883	188	0		1	98223	1	25747	1	24794.6	18.2883
14.1458	1	552845	1	1	1	1	1	596216	143633		1	1	1	1	596979	119397	14.1458	300	0		627632	1	1	1	1	442501	178356	14.1458	300	0		595223	1	1	1	1	1	99204.7	14.1458	300	0		1	1	1	20868	1	4174.4	14.1458
17.06	169792	321511	91544	89882	10978	141383	73807	158991	132236		10801	98982	28283	21978	104235	52855.8	17.06	130	0		192953	1	23269	24122	79956	58245	63091	17.06	130	0		367393	50654	21602	381263	25902	273720	186756	17.06	130	0		1	52726	98182	82461	37647	54203.4	17.06
10.9317	1	24456	11704	5873	1	21364	32324	18948	14333.9		1	1	19619	1	1	3924.6	10.9317	116	0		1	16038	1	1	1	1	2673.83	10.9317	116	0		33131	1	71646	1	11034	3655897	628618	10.9317	116	0		4918	25966	1	1	3013	6779.8	10.9317
14.0642	98870	104021	117241	154768	100717	176511	104390	117044	121695		65200	148933	113821	103798	114207	109192	14.0642	283	0		118624	1	123954	144026	153340	1	89991	14.0642	283	0		116819	149260	92374	137088	145459	1	106834	14.0642	283	0		1	170254	144894	1	185056	100041	14.0642
10.4925	70777	57585	1	68642	80962	64674	1	1	42830.4		89085	70669	57269	76763	61989	71155	10.4925	77	0		81196	1	80456	1	1	76346	39666.8	10.4925	77	0		73936	67619	2488224	98180	1	1	454660	10.4925	77	0		70327	19283	59880	1	1	29898.4	10.4925
8.2125	993204	1	3242	168817	1	81905	1	15103	157784		1	1	1	1	26901	5381	8.2125	75	0		1	58022	1	1	1	60714	19790	8.2125	75	0		4223	167285	122926	1	1	1	49072.8	8.2125	75	0		1	352446	161160	1	228158	148353	8.2125
10.0383	166603	74929	76977	27813	48391	30018	171293	130671	90836.9		81317	78434	191362	208817	48889	121764	10.0383	147	0		316350	1	64613	223050	1	137140	123526	10.0383	147	0		113455	115580	1	163954	1	1	65498.7	10.0383	147	0		9455	94489	1	155383	54269	62719.4	10.0383
20.9208	191662	200996	180491	76624	34085	92538	38473	84402	112409		8433	41152	232959	136780	164522	116769	20.9208	102	0		150810	1	266078	258085	144911	134424	159052	20.9208	102	0		17845	110605	40442	47016	320543	1	89408.7	20.9208	102	0		1	272267	42278	52190	52336	83814.4	20.9208
22.1483	84133	120649	127488	134173	145677	208072	181866	111494	139194		1	160125	70302	94459	114181	87813.6	22.1483	61	0		112208	1	110882	1	161147	36531	70128.3	22.1483	61	-69065.7		119853	1	1	123233	151703	50938	74288.2	22.1483	61	74288.2		1	251559	1	231764	221833	141032	22.1483
17.9625	1	385507	1	1	1	72328	104688	1	70316		7284	1	256286	1	390938	130902	17.9625	75	0		1009005	3609	338642	1	234143	1	264234	17.9625	75	0		1	136043	25886	1	1	1	26988.8	17.9625	75	0		1	134562	186999	1	282546	120822	17.9625
22.2458	1	93535	107613	115545	1	165621	151220	100724	91782.5		381597	1	73089	1	93021	109542	22.2458	103	0		112164	1	56647	126607	127529	47349	78382.8	22.2458	103	0		102897	120254	136035	1	128578	47393	89193	22.2458	103	0		1	196763	137470	190426	180364	141005	22.2458
8.45833	128291	1	152111	12176	6860	1	237491	1	67116.5		741660	1	1	1	1	148333	8.45833	75	0		27229	1477902	183532	1	140791	17345	307800	8.45833	75	0		151122	1	4478	136416	189571	1	80264.8	8.45833	75	0		1	14163	1	1	19137	6660.6	8.45833
22.1975	260198	1	1	9332	401086	1	1	8901	84940.1		1	454666	285218	287357	342650	273978	22.1975	131	0		18961	1	320335	1	1	1	56550	22.1975	131	0		331543	16144	1403	391020	421398	1	193585	22.1975	131	0		1001	441	8457	1	2202	2420.4	22.1975
19.4375	118892	124647	126342	183483	164967	183843	126312	131439	144991		1	166627	110996	66611	127348	94316.6	19.4375	140	0		153148	1	164308	155352	1	73684	91082.3	19.4375	140	0		120670	188404	99277	139574	116110	122692	131121	19.4375	140	0		1	137515	154900	205200	112840	122091	19.4375
22	110669	93170	109969	58956	53555	106464	49457	66332	81071.5		159	220457	270781	177601	170739	167947	22	204	86875.9		49852	625	84270	89186	53699	77242	59145.7	22	204	0		159318	204175	93298	366509	105837	115922	174176	22	204	174176		1	26144	233426	113313	82281	91033	22
17.4167	430620	1	1	1	696963	1	1	1	140949		1	1	451285	433690	557911	288578	17.4167	74	0		1	1	1	1	1	280883	46814.7	17.4167	74	0		1	1	1	1	1	485838	80973.8	17.4167	74	0		483	1	1	1	1	97.4	17.4167
21.0725	1	182512	152448	117557	244726	56708	97563	98730	118781		16815	77012	1	161142	137541	78502.2	21.0725	74	0		207629	1347	1	196568	120197	321994	141289	21.0725	74	0		98269	69751	55118	84918	1	440816	124812	21.0725	74	0		843	108563	47891	120474	101980	75950.2	21.0725
14.0492	57356	93503	109103	146338	111450	183030	86335	103389	111313		35612	141544	91848	79263	101902	90033.8	14.0492	107	0		116177	5679	102367	149687	144423	58400	96122.2	14.0492	107	0		103080	144017	91873	117466	135709	64637	109464	14.0492	107	0		2775	186722	148752	1	190574	105765	14.0492
25.9467	655238	1	1	1	1	1	1	1	81905.6		1	1	692144	1	1	138430	25.9467	75	0		1	1487	1	1	1	408401	68315.3	25.9467	75	0		1	1	1182138	877854	1	1	343333	25.9467	75	0		1567	1	1	1	1	314.2	25.9467
25.9867	120128	115984	153889	71971	19842	149450	105022	138953	109405		43941	181119	144888	99497	144750	122839	25.9867	219	0		10746	2832	111248	129490	17006	93564	60814.3	25.9867	219	0		129657	171377	236447	183131	106264	109518	156066	25.9867	219	0		554	4752	193111	34461	79123	62400.2	25.9867
9.285	1	1	93997	153126	1	92952	85592	1	53208.9		178941	77470	1	1	134188	78120.2	9.285	207	0		1	974575	99534	110622	116187	91802	232120	9.285	207	0		96710	1	252	96972	87145	1	46846.8	9.285	207	0		1	177192	197136	125864	1	100039	9.285
12.6483	134586	184223	1	1	93591	1	319497	210524	117803		114075	1	211203	182163	196754	140839	12.6483	103	0		1	56911	198609	1	301305	151072	117983	12.6483	103	0		222582	304694	85549	1	3816	170607	131208	12.6483	103	0		28646	1	1	84806	348781	92447	12.6483
21.3758	112364	129260	122057	183569	1	257122	151332	139106	136851		1	135599	107655	107673	133888	96963.2	21.3758	132	0		113245	1	143379	147484	115228	1	86556.3	21.3758	132	0		88236	145798	180343	92444	136918	115545	126547	21.3758	132	0		1	136452	135892	90837	121452	96926.8	21.3758
18.8033	1	156863	178354	225954	1	236915	225166	197857	152639		1	1	146529	1	122998	53906	18.8033	116	0		163371	31538	1	117836	223615	148530	114148	18.8033	116	0		126031	1	182714	156937	1	212624	113051	18.8033	116	0		1	1	185119	1	252958	87616	18.8033
21.3883	143998	148428	109866	153510	1	218973	139223	152240	133280		17804	119678	102646	143859	172715	111340	21.3883	218	0		110101	1	167601	117301	109131	1	84022.7	21.3883	218	0		90955	152031	131152	106136	129462	133695	123905	21.3883	218	0		1	125807	139756	97040	107697	94060.2	21.3883
9.29333	48871	207686	21724	123986	28015	1	1	176952	75904.5		46047	1	50103	39995	1	27229.4	9.29333	74	0		101727	154827	1	76304	1	150310	80528.3	9.29333	74	0		1	5536	63848	1	17944	612384	116619	9.29333	74	0		52995	40700	1	22144	6629	24493.8	9.29333
26.3058	82154	78449	90808	103307	110477	169833	155572	87571	109771		135821	135474	80336	77399	103626	106531	26.3058	143	0		19052	6000	105654	133455	98787	63316	71044	26.3058	143	0		103206	135280	123758	104221	104518	77712	108116	26.3058	143	0		1	20905	140534	196790	103320	92310	26.3058
24.9325	179568	176134	234930	43957	195398	84481	25823	220375	145083		321	69443	193158	166219	217371	129302	24.9325	146	0		84879	1	213346	161784	64000	156518	113421	24.9325	146	0		185339	134831	4688	164956	225152	162666	146272	24.9325	146	0		1	5747	51799	1540	1	11817.6	24.9325
23.1667	489346	1	161325	1	42110	113232	162494	129337	137231		1	214859	1	413676	48496	135407	23.1667	73	0		241973	1	1	176751	1	430349	141513	23.1667	73	0		1	118669	75352	1	1	1	32337.5	23.1667	73	0		24046	76832	1	1	49624	30100.8	23.1667
28.6775	1	1	1	1	1	1	1	1	1		365036	1	1	1	1	73008	28.6775	73	0		1	1074	1	2859505	1	1	476764	28.6775	73	0		1	1	1	1	1	1	1	28.6775	73	#DIV/0!		1	5425	1	1	1	1085.8	28.6775
19.5042	1	1	145553	225879	1	1	1	170123	67695		1	1	1	1	1	1	19.5042	100	0		1	536	130938	1	2258681	103426	415597	19.5042	100	0		1	223883	1	168971	1	1	65476.3	19.5042	100	0		1	1	196231	1	1	39247	19.5042
26.0067	82691	124812	141740	106088	34673	189092	148378	138165	120705		83901	176439	1	96283	133224	97969.6	26.0067	72	0		20142	6079	125594	157803	30534	1	56692.2	26.0067	72	0		136858	168006	173352	1	140103	81023	116557	26.0067	72	0		10584	10040	174579	55499	118813	73903	26.0067
21.0358	1	1	222898	151760	145176	1	1	1	64979.9		14320	74266	1	1	1	17717.8	21.0358	100	0		1	1	1	1	1	2580358	430060	21.0358	100	0		131048	1	35212	1	1	1	27710.7	21.0358	100	0		1	1	39593	97010	1	27321.2	21.0358
17.1442	1	1	59246	165521	217423	150873	148937	177911	114989		110829	168449	131033	1	31392	88340.8	17.1442	73	0		103490	113790	43810	91751	1	1	58807.2	17.1442	73	0		1	172132	52728	1	49568	212777	81201.2	17.1442	73	0		13617	136349	190885	196984	164592	140485	17.1442
22.2808	1	1	144908	173842	106378	1	189315	1	76805.9		519242	114935	1	81732	1	143182	22.2808	116	0		1	1	99046	179110	183734	1	76982.2	22.2808	116	0		93858	168919	187871	1	1	1	75108.5	22.2808	116	0		1	1	189059	262873	1	90387	22.2808
24.53	1	296636	267432	111018	234162	1	1	408746	164750		1	1	1	323359	368720	138416	24.53	73	0		695756	1	1	1	380952	1	179452	24.53	73	0		1	1	1	1	1	440171	73362.7	24.53	73	0		5601	106064	1	105401	1	43413.6	24.53
24.4617	1	252087	1	72500	1	91166	51414	207947	84389.6		1	165921	279387	1	1	89062.2	24.4617	73	0		1	1668	284562	216838	1	802412	217580	24.4617	73	0		1	174355	28793	296965	107674	1	101298	24.4617	73	0		1	1	130469	73408	83769	57529.6	24.4617
20.4833	99152	309935	46915	156967	151253	186601	28345	112859	136503		3407	1	105141	171038	197979	95513.2	20.4833	147	0		31607	1	1	1	1	49657	13544.7	20.4833	147	-122959		163652	96918	4360	250875	1	113073	104813	20.4833	147	0		2039	1	119606	16821	66288	40951	20.4833
11.3075	11428	1	1	142490	91478	53373	1	4956	37966		1	39835	49937	73247	86736	49951.2	11.3075	147	0		1	1	45696	94519	30834	54836	37647.8	11.3075	147	0		3252	1	1	1	38554	2409399	408535	11.3075	147	0		1	72587	1	74203	84688	46296	11.3075
20.9425	131671	178139	173948	95933	1	114326	53914	97849	105723		14863	58222	175455	138239	147874	106931	20.9425	72	0		160141	1	182640	248174	161977	1	125489	20.9425	72	0		26242	129887	56297	58236	270683	1	90224.3	20.9425	72	0		1818	275170	53046	72498	66048	93716	20.9425
22.275	84446	1	100936	136628	108820	162663	172492	102825	108601		362301	116640	1	78849	1	111558	22.275	226	0		99782	1	95815	137452	127220	1	76711.8	22.275	226	0		88635	135565	1	116119	113269	1	75598.3	22.275	226	0		1	223517	152995	180421	186751	148737	22.275
14.2008	1	1	1	1	1	1	1	1	1		1	1	1	1	1083364	216674	14.2008	147	0		466251	1	1	1	1	180906	107860	14.2008	147	0		865022	1	1	1	1	435745	216795	14.2008	147	0		2808	1	87905	1	1	18143.2	14.2008
10.4583	335193	396351	1	16129	10339	29423	1	2904	98792.6		8762	1	355761	385131	415323	232996	10.4583	148	0		1	19211	454871	1	1	341263	135891	10.4583	148	0		418942	1	1	1	18989	1	72989.2	10.4583	148	0		268	19338	1	19522	6676	9161	10.4583
8.7175	1	20815	18742	73863	1	33350	4601	70417	27723.8		74894	90805	83272	1	1	49794.6	8.7175	74	0		227432	12029	64827	1	81074	322391	117959	8.7175	74	0		35659	637587	1	81890	28525	1	130610	8.7175	74	0		348469	1	514370	79181	488938	286192	8.7175
25.9583	605916	1	1	1	1	1	1	1	75740.4		1	1	665302	1	1	133061	25.9583	89	0		1	1	1	1	1	426532	71089.5	25.9583	89	0		1	1	1122072	853241	1	1	329220	25.9583	89	0		1809	1	1	1	1	362.6	25.9583
20.9525	135448	154597	136759	104060	91670	100314	62114	110205	111896		8972	69128	126329	140491	138399	96663.8	20.9525	70	0		143082	1	154745	201223	152772	52550	117396	20.9525	70	0		1	152538	40109	74457	198863	1	77661.5	20.9525	70	0		1	206976	76358	82020	103841	93839.2	20.9525
10.4592	114845	127652	131685	163347	152928	1	203716	132976	128394		1	168093	116556	125863	137950	109693	10.4592	101	0		141981	25501	148132	165181	160723	99941	123576	10.4592	101	0		139560	162619	1	146951	1	1	74855.5	10.4592	101	0		12868	1	165611	1	211580	78012.2	10.4592
11.4525	53627	31125	36120	26604	214391	30538	37214	42726	59043.1		31481	36492	53538	46869	42365	42149	11.4525	100	0		52866	85046	43723	60151	61791	111174	69125.2	11.4525	100	0		25931	19792	22194	37927	64362	70881	40181.2	11.4525	100	0		1925051	60475	36736	50804	42652	423144	11.4525
18.3833	1	1	1	809488	1	1	1	1	101187		1	1	1	532667	1	106534	18.3833	70	0		897122	732	1	1	1	1	149643	18.3833	70	0		1	1	1	1	1	1	1	18.3833	70	0		1	1	1	1	1	1	18.3833
24.9275	216812	219633	283005	1	231938	1	1	267882	152409		814	1	238269	207056	259128	141054	24.9275	144	0		103562	1	256381	190507	1	1	91742.2	24.9275	144	0		226248	161265	11323	1	266819	205334	145165	24.9275	144	0		1	10470	61267	3665	2969	15674.4	24.9275
14.855	1	1	1	2057184	1	1	1	1	257149		1	1	1	1	1	1	14.855	147	0		1559818	1	1	1	1	1	259970	14.855	147	0		1	1	1	1	1	1	1	14.855	147	0		2636	1	1	1	1	528	14.855
14.1017	126158	125535	187302	220316	242569	1	144396	158103	150548		172041	1	1	119751	144045	87167.8	14.1017	134	0		145145	1	1	1	204081	1	58205	14.1017	134	0		139505	1	277776	190119	241449	1	141475	14.1017	134	0		1	1	1	204922	1	40985.2	14.1017
21.8117	39457	1	69156	250560	44376	48361	90489	141125	85440.6		11949	71157	86696	114785	133648	83647	21.8117	100	0		517693	1	37693	30202	56095	568043	201621	21.8117	100	0		1	198812	15448	61273	1	1	45922.7	21.8117	100	0		1	150495	132912	35161	82962	80306.2	21.8117
14.7642	40071	57831	92157	104647	107804	150788	143281	76366	96618.1		140976	106550	68323	55872	78272	89998.6	14.7642	61	0		90970	30923	89094	116429	120890	50807	83185.5	14.7642	61	0		65576	100616	140204	96184	117588	38298	93077.7	14.7642	61	0		8359	175920	116689	154381	154588	121987	14.7642
11.7567	225107	287862	114541	48678	71498	35412	23453	101176	113466		60259	62796	116107	145510	340887	145112	11.7567	84	0		131447	1	156290	198901	184948	75631	124536	11.7567	84	0		78902	160081	36491	38185	78409	168208	93379.3	11.7567	84	0		678	69122	42785	59448	115152	57437	11.7567
21.2083	1	1	1	1	1	1	1	1	1		1	1	1959859	1	1	391973	21.2083	100	0		1	1	1	431356	1	1193607	270828	21.2083	100	0		1	1	1	1	1	1	1	21.2083	100	#DIV/0!		3541	1	1	1	1	709	21.2083
19.5842	1	49549	101047	153788	763527	42612	1	62594	146640		17932	109290	1	6537	1	26752.2	19.5842	147	0		102618	1	1	384208	174010	261591	153738	19.5842	147	0		123464	70415	620184	1	144119	1	159697	19.5842	147	0		1	1	51846	217931	31621	60280	19.5842
18.3192	144915	196916	163069	166395	1	1	1	163540	104355		52985	88418	1	1	1	28281.2	18.3192	174	0		1	1	201208	131210	136181	361102	138284	18.3192	174	0		128504	85508	26055	111469	162436	333063	141172	18.3192	174	0		75	221316	81045	1	99983	80484	18.3192
18.0333	293945	321491	1	307083	1	1	1	1	115316		2770	1	190343	274957	1	93614.4	18.0333	61	0		401519	1	1	1	234358	200562	139407	18.0333	61	0		1	1	1	192856	1	1	32143.5	18.0333	61	0		1	1	1	1	1	1	18.0333
18.0942	1	425075	1	1	1	344452	1	430587	150015		1	1	1	326139	481213	161471	18.0942	61	0		1	1	409414	1	1	1	68236.5	18.0942	61	0		441354	1	1	1	1	402284	140607	18.0942	61	0		1	1	1	1	1	1	18.0942
22.2158	116845	140788	167707	197729	1	259115	231417	152720	158290		1	1	1	1	1	1	22.2158	134	-158289		160674	1	132044	1	1	94893	64602.3	22.2158	134	-93687.9		1	1	1	1	1	109408	18235.5	22.2158	134	18235.5		1	321670	1	1	276926	119720	22.2158
14.0917	144217	1	246142	305952	234450	1	164763	193774	161162		182403	1	1	145511	185110	102605	14.0917	115	0		1	1	1	1	1	1	1	14.0917	115	-161162		1	1	269465	242058	352609	1	144022	14.0917	115	0		1	1	1	196780	1	39356.8	14.0917
29.8025	557272	174972	320556	24893	15886	6537	63190	292286	181949		5016	20810	39032	14721	34749	22865.6	29.8025	74	0		10527	15386	47396	1	21871	2980	16360.2	29.8025	74	0		193768	802764	1	62738	48224	1	184583	29.8025	74	0		1	123310	181340	43667	10529	71769.4	29.8025
21.415	1	116034	136040	192675	129673	262200	166817	154535	144747		633	142718	119995	1	1	52669.6	21.415	115	0		118647	1	1	161087	124135	1	67312	21.415	115	0		1	150199	180509	100519	147289	1	96419.7	21.415	115	0		1768	144812	144741	95120	138943	105077	21.415
22.2408	1	1	1	1	1	1	1	1	1		1	472375	1	274458	357841	220935	22.2408	238	220934		1	1	292620	1	1	214061	84447.5	22.2408	238	0		320380	1	1	1	412717	1	122184	22.2408	238	0		1	1	1	1	1	1	22.2408
18.745	1	1	1	1	1	1	1	1	1		1	1	1	1	679626	135926	18.745	148	0		1	1	404726	1	1	1	67455.2	18.745	148	0		1	1	1409	1	1	521633	87174.3	18.745	148	0		1	1083222	1	1	1	216645	18.745
21.3925	73264	83455	112091	171936	101448	234486	143877	132978	131692		1396	125507	87924	79365	1	58838.6	21.3925	103	-72853.3		117689	1	98660	141159	110756	75927	90698.7	21.3925	103	0		82309	134359	168744	84610	118964	70585	109928	21.3925	103	0		1	129896	128030	85217	115935	91815.8	21.3925
10.3833	1	105788	1	1	157613	239502	1	1	62863.5		506570	167691	1	1	130398	160932	10.3833	102	0		130989	1	134276	168821	163115	1	99533.8	10.3833	102	0		1	175060	1	130783	154131	1	76662.8	10.3833	102	0		1	1	156928	225332	221629	120778	10.3833
22.2133	1	1	1	172364	174595	240285	219656	142067	118621		1	186061	107964	116919	149529	112095	22.2133	102	0		160916	1	146711	1	1	65723	62225.5	22.2133	102	0		151009	1	1	153339	189307	76387	95007.3	22.2133	102	0		1	291816	1	1	253140	108992	22.2133
18.2925	1	223158	226097	229999	1	80530	1	1	94973.5		91966	1	1	61232	1	30640.2	18.2925	70	0		85465	1	194707	181171	188907	1	108375	18.2925	70	0		243510	181333	41936	179957	200727	70527	152998	18.2925	70	0		98376	1	173691	62301	188123	104498	18.2925
11.205	1	215229	1	1	287920	207799	1	1	88869.1		1	182758	1	69858	185644	87652.4	11.205	75	0		144893	1	250880	73835	199612	111182	130067	11.205	75	0		229512	159381	1	197991	174734	1	126937	11.205	75	0		1	207645	79668	1	259051	109273	11.205
21.4575	1	1	1	1	1374154	1	1	1	171770		39	1	1	1	1	8.6	21.4575	156	0		1	1	1	1	1	989693	164950	21.4575	156	0		1	1	1	1	1	1	1	21.4575	156	0		1	1	1	1	1	1	21.4575
22.1842	117830	138180	1	175400	165211	1	220841	143241	120088		1	187942	116048	115442	142592	112405	22.1842	115	0		156622	293	145698	1	1	1	50436	22.1842	115	0		143614	1	681	158768	186050	84395	95584.8	22.1842	115	0		1	298049	1	1	255204	110651	22.1842
20.895	148307	132971	92164	104861	226580	114948	62248	80245	120290		29185	96261	85268	163680	124957	99870.2	20.895	156	0		162699	1	221958	169149	132442	1	114375	20.895	156	0		60340	112987	45266	87332	119912	93554	86565.2	20.895	156	0		1	111504	58938	91012	60553	64401.6	20.895
22.2383	1	1	1	1	1	1	1	1	1		763966	1	1	1	1	152794	22.2383	60	0		1	1	108562	214175	1	1	53790.2	22.2383	60	0		101975	208872	255324	1	1	1	94362.3	22.2383	60	94362.3		1	308221	227941	326930	1	172619	22.2383
19.4975	1	1	1	60662	1	1	1	1	7583.62		1750	1	1	1	1	350.8	19.4975	232	0		1	1	1	1	3199815	68450	544712	19.4975	232	0		1	65192	1	1	1	1	10866.2	19.4975	232	0		1	1	48135	1	1	9627.8	19.4975
29.4508	1	6830	1	4300	64088	451	3660	1	9916.5		527570	5087	1	1	1	106532	29.4508	73	0		1	1	1	1029656	10545	1	173368	29.4508	73	0		1	1	87318	1	1	885259	162097	29.4508	73	0		180336	1	9368	1	2807	38502.6	29.4508
19.8442	1	121449	231164	239585	261475	1	73649	152975	135037		1	1	1	124618	88597	42643.6	19.8442	73	0		1	1	59954	1	1	283817	57295.8	19.8442	73	0		175055	302481	79446	215789	89855	1	143771	19.8442	73	0		1	204716	285329	1	134264	124862	19.8442
22.3042	1	1	1	758724	1	1	1	1	94841.4		1	1	1	1	1	1	22.3042	130	0		1	1	1	1	1	1	1	22.3042	130	0		1	1	1	696195	1	1	116033	22.3042	130	0		1	1	1	1095090	1	219019	22.3042
10.7817	206380	38185	38110	51928	54641	195960	8777	30447	78053.5		64528	48050	31246	37087	21478	40477.8	10.7817	74	0		102544	1	305802	268140	195599	432999	217514	10.7817	74	139461		1	37026	1	116674	69234	1	37156.2	10.7817	74	0		1	25680	18761	214385	23911	56547.6	10.7817
18.3017	104731	1	1	461897	1	1	1	1	70829.2		1	1	280728	364777	1	129102	18.3017	188	0		455361	1	1	1	1	1	75894.3	18.3017	188	0		1	1	1	194389	1	290306	80783.2	18.3017	188	0		1	19971	221941	1	267736	101930	18.3017
11.955	79767	356647	429271	37339	15043	97322	26538	249469	161424		13783	49366	42511	42176	69439	43455	11.955	89	0		55425	1	91070	84856	25784	36052	48864.7	11.955	89	0		312709	26029	24684	62977	59730	427012	152190	11.955	89	0		1	7736	74467	16193	63027	32284.8	11.955
8.795	1	58501	65508	66619	57324	84979	112256	65831	63877.4		228657	117343	95467	75272	88755	121099	8.795	78	57221.4		93390	149250	87546	116753	126511	87260	110118	8.795	78	46241		105217	1	511975	129596	86423	81035	152374	8.795	78	0		9206	110834	10349	110279	1	48133.8	8.795
18.3125	1	356173	1	1	161825	1	172016	1	86252.4		1	1	1	1	370668	74134.4	18.3125	86	0		1	1	379196	1	1	1	63200.2	18.3125	86	0		301997	1	1	240983	1	543943	181154	18.3125	86	0		8484	367814	1	170674	1	109395	18.3125
14.2283	36632	360442	52350	108360	1	1	53760	41017	81570.4		63660	1	1	1	431683	99069.2	14.2283	75	0		414328	4530	77244	1	66524	307425	145009	14.2283	75	0		408651	1	50291	55473	1	231682	124350	14.2283	75	0		24233	1	76387	14249	1	22974.2	14.2283
18.7467	1	189554	1	1	130474	1	1	1	40004.2		163751	235127	87116	1	165902	130379	18.7467	115	0		191964	1	164721	1	1	165988	87112.7	18.7467	115	0		186897	184159	1	1	219541	120280	118480	18.7467	115	0		1131	292689	1	232396	1	105244	18.7467
21.3458	1	1	1	1	1401241	1	1	1	175156		135437	1	1	913074	920972	393897	21.3458	147	0		1	1	1	1	1	1	1	21.3458	147	0		1	1	1	1	1	1	1	21.3458	147	0		1	1	1	1	1	1	21.3458
11.31	97449	1	1	127584	228033	94674	1	121325	83633.5		168495	173775	70084	208781	142710	152769	11.31	73	0		1	372361	38089	1	8435	115019	88984.3	11.31	73	0		1	82148	1	185388	1	1	44590	11.31	73	0		111895	156349	1	162557	126419	111444	11.31
19.8258	177	1	11962	238	1	1	1	1573	1744.25		1	1	155	133	1	58.2	19.8258	264	0		1	6443	1	2093	1657	20	1702.5	19.8258	264	0		1	1	1	1645	1	9	276.333	19.8258	264	0		3348263	1	2550	1	1706	670504	19.8258
22.1475	81042	102852	120634	117328	129043	187737	162221	99901	125095		1	139978	64809	99202	95051	79808.2	22.1475	66	0		96944	1	100534	1	146815	34292	63097.8	22.1475	66	-61996.9		1	1	1	107259	129568	43022	46642	22.1475	66	46642		1361	219506	1	206497	187760	123025	22.1475
22.32	1	202635	236516	292514	1	331829	1	218785	160285		1	283243	1	1	220422	100734	22.32	149	0		1	1	1	322651	1	1	53776	22.32	149	0		1	1	302495	261176	272592	1	139378	22.32	149	0		1	1	1	427480	1	85496.8	22.32
25.9508	568957	1	1	1	1	1	1	1	71120.5		1	1	607729	1	1	121547	25.9508	74	0		1	1	1	1	1	384522	64087.8	25.9508	74	0		1	1	1030072	779939	1	1	301669	25.9508	74	0		1	1	1	1	1	1	25.9508
9.12083	151022	50004	50066	83040	9140	86942	89733	1	64993.5		251308	162044	95954	134372	49352	138606	9.12083	89	0		1	70516	123730	62553	235087	1	81981.3	9.12083	89	0		160728	171371	22135	161672	74820	159469	125032	9.12083	89	0		4362	1	1	342608	48228	79040	9.12083
19.5	1	1	191711	291775	202820	1	1	204148	111307		1	1	176701	142845	1	63909.8	19.5	86	0		190405	173	169364	217663	163033	106261	141150	19.5	86	0		1	281515	1	204705	1	1	81037.3	19.5	86	0		1	228498	239623	51596	1	103944	19.5
18.0175	1	1	1	1	1	1	1	459892	57487.4		5276	1	1	724386	349611	215855	18.0175	102	0		1	1	326345	1	1	799776	187688	18.0175	102	0		1	1	1	1	1	1	1	18.0175	102	0		1	1	1	1	296294	59259.6	18.0175
21.3642	3325444	1	1	1	1	1	1	1	415681		1	1	1	1	1	1	21.3642	73	0		1	1	1	1	1	1	1	21.3642	73	0		1	1	1	1	1	1	1	21.3642	73	0		1	1	1	1	1	1	21.3642
22.1917	215414	1	1	1	362694	1	1	1	72264.2		1	400821	240129	246319	311741	239802	22.1917	114	0		1	1	280301	1	1	1	46717.7	22.1917	114	0		294481	1	1	337446	375905	1	167972	22.1917	114	0		592	1	1	1	1	119.2	22.1917
26.3358	1	1	1	1	1	1	1	1	1		1	512758	1	1	422627	187078	26.3358	89	0		1	1	1	1	1	1	1	26.3358	89	#DIV/0!		1	570981	1	1	1	276308	141216	26.3358	89	0		1	1	1	888449	1	177691	26.3358
26.0283	1	100563	116325	86744	29441	148734	118022	115379	89401.1		70985	147550	97547	77710	110025	100763	26.0283	71	0		16655	5158	104257	125036	25676	1	46130.5	26.0283	71	0		112779	140224	145902	127401	112362	68090	117793	26.0283	71	0		100153	8573	145119	40797	95874	78103.2	26.0283
12.2667	68671	1	1	63391	23833	1	82397	1	29787		1	36186	1	1	287529	64743.6	12.2667	73	0		1	1	1	114153	6774	747100	144672	12.2667	73	0		1	1	3314	1	1	180270	30598	12.2667	73	0		1	61297	100891	56924	66555	57133.6	12.2667
14.8658	1	273503	363987	1	1	509965	1	272552	177501		1	1	1	244275	291077	107071	14.8658	75	0		324857	8369	1	1	1	1	55538.3	14.8658	75	0		1	1	568641	1	1	168198	122807	14.8658	75	0		8009	1	1	1	1	1602.6	14.8658
14.77	41525	54619	82167	104543	95400	134801	129599	81433	90510.9		132784	107120	62297	52772	70318	85058.2	14.77	70	0		69037	27529	76528	107435	110556	39193	71713	14.77	70	0		61215	90053	114068	93063	103816	45765	84663.3	14.77	70	0		1	164764	110491	147420	138996	112334	14.77
13.8975	82462	35785	93779	36967	176804	41712	81136	54117	75345.2		53667	78238	80887	95547	37722	69212.2	13.8975	175	0		41488	19091	86719	79149	69034	249278	90793.2	13.8975	175	0		28934	71148	536079	39804	138781	63892	146440	13.8975	175	0		80938	107784	92770	262832	42304	117326	13.8975
17.4683	1	1	132241	166968	124046	198471	179604	131764	116637		155151	1	1	96208	102524	70777	17.4683	116	0		128293	35685	1	174686	1	60489	66525.8	17.4683	116	0		1	1	112926	1	1	85989	33153.2	17.4683	116	33153.2		1	1	143187	1	224512	73540.4	17.4683
14.0833	1	225690	92904	149212	100445	161385	40634	104647	109365		1	136070	112619	1	1	49738.4	14.0833	189	0		167358	24907	106415	139951	149265	71613	109918	14.0833	189	0		1	148257	65593	1	130342	63958	68025.3	14.0833	189	0		1	1	138075	46793	179399	72853.8	14.0833
26.3017	81669	68484	1	88087	96430	144841	132573	95239	88415.5		121517	124151	82406	78866	93193	100027	26.3017	191	0		17675	5624	92939	114473	85413	65085	63534.8	26.3017	191	0		88992	123096	123241	1	89750	72732	82968.7	26.3017	191	0		1	19610	129342	179177	90735	83773	26.3017
14.7842	51396	66210	89657	110304	101433	137427	134591	77526	96068		94019	101242	76943	56260	59608	77614.4	14.7842	115	0		76523	14481	91441	107499	106647	39251	72640.3	14.7842	115	0		59662	99545	128579	98931	98116	27088	85320.2	14.7842	115	0		2797	170395	117531	141176	144139	115208	14.7842
23.6842	23692	226457	16718	93116	1	110252	187540	136381	99269.6		1	106223	1	1	44713	30187.8	23.6842	73	0		1246109	4904	1	1	169349	1	236728	23.6842	73	0		100387	55302	1	35037	1	78366	44849	23.6842	73	0		2849	83815	58516	83331	57763	57254.8	23.6842
8.865	1177865	113030	29167	47683	62082	63673	1	88977	197810		1	52395	58116	95171	134191	67974.8	8.865	147	0		158803	1	4903	70095	75936	1	51623.2	8.865	147	0		1	1	72842	1	1	14753	14599.8	8.865	147	0		1	1	1	56830	1	11366.8	8.865
22.3492	197616	1	1	283422	1	1	1	1	60130.5		1	1	196575	1	1	39315.8	22.3492	175	0		1	1	1	296456	271096	1	94592.7	22.3492	175	0		1	284068	1	251312	1	1	89230.7	22.3492	175	0		1	442295	1	389149	1	166289	22.3492
10.3567	99339	55709	76489	25214	67618	50587	77812	111075	70480.4		139649	186752	203758	174404	1	140913	10.3567	151	70432.4		177944	42100	119727	366984	230581	1	156223	10.3567	151	0		195404	1808	1	146247	72214	268	69323.7	10.3567	151	0		1	101836	1	82470	79770	52815.6	10.3567
8.27833	1	1	78856	1	1	1	22077	63026	20495.5		205823	81312	1	70550	1	71537.4	8.27833	75	0		156576	323988	54477	1	1	159092	115689	8.27833	75	0		78513	1	3725	1	97501	1	29957	8.27833	75	0		853742	209319	1	137039	12367	242494	8.27833
26.0033	79414	127358	141840	83698	24986	176852	118788	139445	111548		54906	172877	1	84847	1	62526.4	26.0033	87	0		13780	3805	115037	141145	20476	1	49040.7	26.0033	87	0		137493	166085	162286	1	120035	76064	110327	26.0033	87	0		806	6511	165438	35079	87624	59091.6	26.0033
21.2133	6754	147073	249853	201860	80281	19046	243000	13924	120224		1	27680	223063	42108	105534	79677.2	21.2133	234	0		88597	608	73134	25220	34245	154566	62728.3	21.2133	234	0		214851	15336	9122	40326	258527	87098	104210	21.2133	234	0		1	2613	5123	28244	198558	46907.8	21.2133
16.8875	1	1	1	1	1	1	196705	1	24589		191637	120764	173535	1	227529	142693	16.8875	73	118104		191700	166047	1	140033	1	1	82963.8	16.8875	73	0		1	286970	1	1	1	1	47829.2	16.8875	73	0		1	303255	1	163851	284770	150376	16.8875
17.0708	136099	129299	62475	73788	18181	101092	47252	131586	87471.5		23182	143872	64283	23484	59639	62892	17.0708	100	0		177367	1927	60692	75090	143012	94102	92031.7	17.0708	100	0		242818	61106	17630	251601	31107	152462	126121	17.0708	100	0		1	52216	61391	190254	37788	68330	17.0708
14.945	1	1	1	1	1	1	1	40772	5097.38		1	1	1	1	1	1	14.945	174	0		1	1	1	11968	1	3103899	519312	14.945	174	0		1	1	9063	1	16935	1	4333.67	14.945	174	0		1	16441	1	17125	1	6713.8	14.945
11.6192	55692	118908	85183	100951	19267	124231	37396	49536	73895.5		31840	149212	95504	110453	130763	103554	11.6192	89	0		171366	5325	110952	69478	94935	122696	95792	11.6192	89	0		150389	144936	7641	138341	138935	155968	122702	11.6192	89	0		1	99193	137548	3582	183858	84836.4	11.6192
9.73	29327	1	678767	15090	1	13086	68340	65715	108791		1	32216	1	75039	1	21451.6	9.73	73	0		1	342141	578229	1	22730	1	157184	9.73	73	0		363839	3284	17001	74045	637016	1	182531	9.73	73	0		1	85410	1	3657	21862	22186.2	9.73
8.78833	1	72992	79296	62083	65115	71482	101104	86231	67288		185980	174185	165073	114669	119883	151958	8.78833	266	84670		191329	79567	115846	170286	204817	1	126974	8.78833	266	0		187957	1138	64	175364	105477	127179	99529.8	8.78833	266	0		1	1	1014	111608	1328	22790.4	8.78833
19.3342	297853	124206	145572	50605	32753	74624	63436	153892	117868		1626	82242	100174	201541	140525	105222	19.3342	176	0		71524	1	185144	1	80004	199975	89441.5	19.3342	176	0		153708	115149	7157	71600	112053	107024	94448.5	19.3342	176	0		1	129633	103464	107442	36227	75353.4	19.3342
18.1342	40316	79335	158429	1	77658	83610	60451	128121	78490.1		26251	158322	1	1	72472	51409.4	18.1342	84	0		1	1	99831	185629	154333	34127	78987	18.1342	84	0		110455	188855	39564	154770	181840	50803	121048	18.1342	84	0		35756	115758	221394	68861	197497	127853	18.1342
25.9742	111111	119525	147875	80092	22558	162455	112612	140894	112140		52972	179894	132457	1	1	73065	25.9742	135	0		13136	3957	115225	134591	19773	1	47780.5	25.9742	135	-64359.8		133942	172872	1	168499	112562	1	97979.5	25.9742	135	0		1	6253	183862	32891	85230	61647.4	25.9742
9.4275	856	1	55886	9355	1	93015	87331	1	30805.8		141853	41605	1386	1	167966	70562.2	9.4275	74	0		9952	326010	44942	46160	46881	1	78991	9.4275	74	0		662394	5947	64834	616970	36030	1	231029	9.4275	74	0		52690	66509	1	110188	94900	64857.6	9.4275
22.3908	1	1	1	1	1	1	333224	1	41653.9		58494	262220	186341	176890	197207	176230	22.3908	160	134577		1	2117	211280	1	263459	1	79476.5	22.3908	160	0		1	1	112218	1	1	1	18703.8	22.3908	160	0		1	1	1	390201	368668	151774	22.3908
9.29167	47633	207789	1	112687	26999	1	1	162214	69665.6		35002	1	47180	39196	1	24276	9.29167	174	0		92623	27622	1	1	1	135043	42548.5	9.29167	174	0		1	1	1	1	1	625938	104324	9.29167	174	0		1	24071	1	1	1	4815	9.29167
29.3358	228820	72771	104145	55265	129233	20807	26688	137396	96890.6		6052	50837	98854	70863	70632	59447.6	29.3358	75	0		63336	5408	71208	1	73160	142087	59200	29.3358	75	0		70813	115131	692354	80106	67578	8683	172444	29.3358	75	0		1	107733	90626	76802	49811	64994.6	29.3358
17.075	1	42992	85469	82579	23683	113534	74039	121340	67954.6		1	122043	69614	80788	41642	62817.6	17.075	147	0		218357	1555	65008	1	144819	1	71623.5	17.075	147	0		269817	57580	10756	275457	1	189458	133845	17.075	147	0		1	93441	83283	196872	39299	82579.2	17.075
21.4125	1	1	1	1	1276177	1	1	1	159523		1	1	1	1	1	1	21.4125	147	0		1	1029	1	1	1	900370	150234	21.4125	147	0		1	1	1	1	1	1	1	21.4125	147	0		1	1	1	1	1	1	21.4125
21.3575	1	1	104313	177444	1	225081	165466	132636	100618		22586	161550	91064	1	1	55040.4	21.3575	60	0		124203	1	1	156643	141480	39933	77043.5	21.3575	60	0		100810	146038	1	92461	112172	1	75247.2	21.3575	60	0		167	168255	145009	107823	153251	114901	21.3575
22.4525	460938	1	1	1	1	1	1	529357	123788		1	1	502197	1	1	100440	22.4525	225	0		1	1	571232	1	1	1	95206.2	22.4525	225	0		527416	1	1	1	1	1	87903.5	22.4525	225	0		1	1	1	1	1	1	22.4525
21.255	1	152134	214033	193752	217487	1	242061	1	127434		6570	1	165138	1	133488	61039.6	21.255	131	0		113563	1	135450	1	56268	1	50880.7	21.255	131	0		202767	1	18222	55400	242254	83339	100330	21.255	131	0		1	19237	1	52292	205683	55442.8	21.255
21.2775	1	1	342340	240664	180837	1	273480	1	129666		1	1	346062	1	96465	88506	21.2775	348	0		1	1	129736	1	1	251210	63491.7	21.2775	348	0		289859	26636	1	1	354266	1	111794	21.2775	348	0		1	1	11829	1	1	2366.6	21.2775
23.0283	1	1	1	117237	1	165673	12779	1	36961.8		1	255916	1	541643	1	159512	23.0283	73	0		5840	1	33371	1	485768	408486	155578	23.0283	73	0		1	1	1	66962	1	1	11161.2	23.0283	73	0		55091	141667	1	1	87328	56817.6	23.0283
8.125	2799	162296	140281	164	121417	1	85420	144620	82124.8		273353	139871	151491	160213	1	144986	8.125	176	0		243	1	163082	208051	191087	98893	110226	8.125	176	0		132723	415	242	146785	1	176755	76153.5	8.125	176	0		130	578	300	134345	1153	27301.2	8.125
39.5975	136412	4876	99686	17007	9389	122201	39656	45388	59326.9		767	262049	328596	169829	66437	165536	39.5975	73	0		11951	83572	24844	1	24397	36230	30165.8	39.5975	73	0		37123	70688	124195	428892	47202	209	118052	39.5975	73	0		87990	23758	26328	451430	39281	125757	39.5975
15.9775	88497	74670	57561	86540	244397	100441	115550	77237	105612		22811	85130	72792	94197	135810	82148	15.9775	206	0		150191	1	123034	132376	33605	151607	98469	15.9775	206	0		62514	91110	200796	91242	65422	80810	98649	15.9775	206	0		736	58135	70961	91859	66291	57596.4	15.9775
18.205	1	1	237995	1	273006	1	172839	1	85480.6		1	268786	1	1	263606	106479	18.205	64	0		1	1	1	1	324762	66206	65162	18.205	64	0		1	140756	1	1	302903	71311	85828.8	18.205	64	0		793	1	298890	1	1	59937.2	18.205
26.2342	295776	184	388816	1585	1	1	1	362830	131149		1	1	321695	269835	1	118307	26.2342	148	0		985	1	1	1	1	209709	35116.3	26.2342	148	0		1	1	502561	409109	1	1	151946	26.2342	148	0		2617	1334	4457	1	1061	1894	26.2342
19.0308	203431	321392	1	447566	1	1	1	1	121549		1	1	1	1	1	1	19.0308	73	0		1	42003	184943	1	533392	1	126724	19.0308	73	0		1	1	1	1	1	708069	118012	19.0308	73	0		12106	1	202629	1	195704	82088.2	19.0308
22.1892	71070	88358	105643	121343	1	163821	146569	96459	99158		1	126898	76350	1	98928	60435.6	22.1892	119	0		99471	1	75966	1	132381	53888	60284.7	22.1892	119	0		94027	1	1	106429	118627	61887	63495.3	22.1892	119	0		596	202048	1	1	169870	74503.2	22.1892
17.7025	153202	179036	107937	1	1	74658	47278	168166	91284.9		1	181334	310002	102284	220263	162777	17.7025	73	0		97613	1	242175	209272	1	1	91510.5	17.7025	73	0		1	234266	1	141435	1	1	62617.5	17.7025	73	0		2832	143008	1	1	1	29168.6	17.7025
20.02	1	213834	91397	89295	1	1	1	131577	65763.4		4909	99683	285316	271623	187664	169839	20.02	147	0		1	8042	1	18149	169488	138520	55700.2	20.02	147	0		279673	163627	1	155467	102343	1	116852	20.02	147	0		12267	131449	155313	45312	79127	84693.6	20.02
22.385	1	217789	1	1	282745	1	368545	1	108636		1	1	219055	209535	1	85718.6	22.385	172	0		236503	1	1	308038	1	1	90757.5	22.385	172	0		1	1	1	1	1	1	1	22.385	172	0		1	1	1	414188	410603	164959	22.385
20.9475	92056	152248	148762	76325	34646	84850	32057	76425	87171.1		9364	40700	141745	115558	136466	88766.6	20.9475	60	0		130452	1	153435	209221	136679	1	104965	20.9475	60	0		24317	101205	40538	42048	223513	1	71937	20.9475	60	0		1	247394	31344	50333	47788	75372	20.9475
14.6058	68878	167273	1	1	85987	84513	130220	132235	83638.5		1	105793	107290	103219	154587	94178	14.6058	299	0		168204	1	92323	96787	182504	231151	128495	14.6058	299	0		140167	1	66535	125158	117726	1	74931.3	14.6058	299	0		167	1	97253	3066	103891	40875.6	14.6058
22.4167	1	1	188534	234807	225589	50335	1	1	87408.6		41502	224555	1	1	191562	91524.2	22.4167	189	0		191770	2737	1	62462	225513	1	80414	22.4167	189	0		1	63526	112355	213433	225061	1	102396	22.4167	189	0		1	49108	216608	124399	1	78023.4	22.4167
20.6167	1	1	136675	150601	323606	106823	136615	1	106790		1	1	273786	197327	1	94223.2	20.6167	73	0		1	26523	1	355301	1	290404	112038	20.6167	73	0		1	157004	115298	1	1	1	45384.3	20.6167	73	0		18195	1	1	1	152291	34097.8	20.6167
19.4342	26612	37548	37701	1	254723	62409	36626	1	56952.6		17159	1	227559	133927	42245	84178.2	19.4342	101	0		184938	1	1	372821	1	97855	109270	19.4342	101	0		36918	1	227312	1	1	29728	48993.5	19.4342	101	0		1	481763	1	544163	33919	211969	19.4342
11.9525	83656	316893	388819	39953	14982	85597	18675	194618	142899		1	47522	14947	25609	59915	29598.8	11.9525	75	0		63204	138668	69175	1	1	44347	52566	11.9525	75	0		279941	33709	7296	1	60325	311642	115486	11.9525	75	0		1	1	87885	6625	72846	33471.6	11.9525
26.2467	587057	1	769689	1768	1	1438	1	1	169994		1	1	632720	1	3892	127323	26.2467	157	0		1674	1	1	1	1	5525	1200.5	26.2467	157	0		1	2929	987055	1	1	3812	165633	26.2467	157	0		1	1299	4158	1	1481	1388	26.2467
22.1725	86488	1	1	157055	155614	1	203327	131845	91791.5		1	172411	89197	105619	132822	100010	22.1725	87	0		128763	1	111669	1	1	50344	48463.2	22.1725	87	0		127315	1	1	134993	159981	65428	81286.5	22.1725	87	0		474	276875	1	1	236456	102761	22.1725
21.4158	1	88224	119117	168553	103397	212979	151519	123370	120895		1	119326	1	1	1	23866	21.4158	117	-97029		102179	1	110195	133566	97900	1	73973.7	21.4158	117	0		1	122567	155271	81791	125576	1	80867.8	21.4158	117	0		1	122963	120247	83750	107211	86834.4	21.4158
8.38	132992	1	1	28636	1	1	45456	53129	32527.1		270092	169854	1	1	1	87989.8	8.38	73	0		1	1912775	78264	1	1	1	331840	8.38	73	0		1	9962	1	1	1	52266	10372	8.38	73	0		1	52620	1	1	42199	18964.4	8.38
22.3192	1	130732	1	192112	1	1	1	143519	58296		1	185352	1	1	150261	67123.2	22.3192	248	0		1	1	1	202361	184367	1	64455.3	22.3192	248	0		137805	195846	237983	1	177513	122971	145353	22.3192	248	0		1	306625	1	261976	1	113721	22.3192
8.985	216468	67816	43873	74156	10559	50193	105073	240174	101039		34834	131408	153578	150960	57912	105738	8.985	111	0		154971	1983	130782	49461	85446	289876	118753	8.985	111	0		161406	1	1	1	28154	119082	51440.8	8.985	111	0		1311	123293	1	47590	1	34439.2	8.985
17.4358	194441	1	1	1	294968	1	1	1	61176.9		1	266263	198660	176065	225641	173326	17.4358	117	0		1	1	229337	1	123680	137788	81801.3	17.4358	117	0		202396	1	1	166352	1	199980	94788.5	17.4358	117	0		1	159195	1	200319	1	71903.4	17.4358
20.9917	163491	114725	64613	90742	287076	87157	59078	70733	117202		24653	78838	82069	147620	103189	87273.8	20.9917	156	0		127776	1	192022	145185	87704	143320	116001	20.9917	156	0		56673	57074	55068	69191	1	110706	58118.8	20.9917	156	0		1	88358	55530	97205	51044	58427.6	20.9917
32.3933	90615	10543	41332	21386	157464	71125	25416	41821	57462.8		1	256661	256717	80019	136789	146037	32.3933	73	0		5576	14552	19412	1	23912	70342	22299.2	32.3933	73	0		38732	89877	552222	194313	70608	5723	158579	32.3933	73	0		77874	8696	82757	349104	22107	108108	32.3933
14.0342	42822	83935	98713	125549	1	168090	90272	90547	87491.1		40624	126135	77911	69666	89550	80777.2	14.0342	89	0		105362	232400	91851	134022	124687	67179	125917	14.0342	89	0		96233	1	1	105779	117794	1	53301.5	14.0342	89	0		117245	1	1	1	172098	57869.2	14.0342
22.7017	399711	1	1	201439	1	1	62702	1	82982.1		1	1	291959	1	1	58392.6	22.7017	147	0		108834	1	289137	1	1	196465	99073.2	22.7017	147	0		288988	122804	1	1	194349	1	101024	22.7017	147	0		272	116751	23947	169684	1	62131	22.7017
10.2992	1	1	121753	18311	105357	1	121411	136614	62931.1		218123	229561	1	1	1	89537.4	10.2992	77	0		1	1	46983	445722	298737	29793	136873	10.2992	77	0		1	1	1	32302	129713	1	27003.2	10.2992	77	0		1	139501	1	139960	132966	82485.8	10.2992
25.0275	1	1	1	1	2796094	1	1	21412	352189		1	1	47572	1	1	9515.2	25.0275	147	0		1	1	1	1	1	86725	14455	25.0275	147	0		1	7949	1	1	1	1	1325.67	25.0275	147	0		1	1	1	1	1	1	25.0275
15.6508	113815	231701	44656	196992	69767	78645	148071	162110	130720		1	77141	75277	1	50538	40591.6	15.6508	73	-90128		97066	93915	72224	81832	1	1	57506.5	15.6508	73	-73213.1		1	125226	1	134206	30897	184235	79094.3	15.6508	73	0		39804	97594	37352	22868	227278	84979.2	15.6508
10.3775	1	1	1	145232	148773	305485	1	1	74936.9		488136	145269	1	1	1	126682	10.3775	66	0		1	346164	139698	1	152451	106582	124150	10.3775	66	0		1	185714	16341	1	1	1	33676.5	10.3775	66	0		8815	1	176153	213909	1	79775.8	10.3775
10.4717	98551	112692	109365	132653	123039	1	156676	111068	105506		33678	136392	98802	109827	121800	100100	10.4717	88	0		120037	34574	128104	127077	122394	1	88697.8	10.4717	88	0		118535	129750	2156	120250	1	1	61782.2	10.4717	88	0		19257	1	132002	1	164268	63105.8	10.4717
26.2792	75747	53517	91726	68276	78789	126579	108308	88473	86426.9		73351	112594	79053	70703	85670	84274.2	26.2792	219	0		9959	2893	76731	95575	64348	60715	51703.5	26.2792	219	0		75327	114165	129832	99021	69947	60501	91465.5	26.2792	219	0		255	10473	115232	163447	64282	70737.8	26.2792
22.4233	1	142734	247175	230504	135868	1	1	1	94535.6		1	383006	1	1	1	76602	22.4233	132	0		1	1	1	1	321510	1	53585.8	22.4233	132	0		185653	1	31759	1	318377	1	89298.7	22.4233	132	0		1	1	651976	1	1	130396	22.4233
22.2742	64142	62693	78474	102599	1	122347	127488	73629	78921.6		281673	87475	63194	58721	1	98212.8	22.2742	190	0		1	1	72625	105830	99051	1	46251.5	22.2742	190	0		65911	102009	111734	87823	83372	58917	84961	22.2742	190	0		300	165717	118887	139727	141688	113264	22.2742
23.1075	515315	1	166155	100497	53902	1	1	201980	129732		1	241421	1	641047	1	176494	23.1075	73	0		1	1	1	1	1	463540	77257.5	23.1075	73	0		1	58354	1	53050	1	1	18568	23.1075	73	0		13393	1	1	1	70098	16698.8	23.1075
18.1525	1	1	153612	193900	185819	1	77024	1	76294.9		4001	178570	133549	124089	1	88042	18.1525	87	0		150500	1	1	1	193954	77371	70304.7	18.1525	87	0		147195	1	1	147461	169285	1	77324	18.1525	87	0		1	1	175299	1	197266	74513.6	18.1525
29.225	953615	59159	278887	12925	1	12384	73338	157741	193506		1	1	1	1	5054	1011.6	29.225	73	0		1341	5357	1	1	1	1	1117	29.225	73	0		96940	379956	1	1	54654	19013	91760.8	29.225	73	0		59901	86479	98519	199910	10770	91115.8	29.225
21.2633	72627	153732	168543	188124	197039	47948	221238	1	131156		7125	55114	73474	109357	1	49014.2	21.2633	60	0		120051	1	109828	50375	65298	33718	63211.8	21.2633	60	0		159211	1	17928	57209	197515	1	71977.5	21.2633	60	0		1	1	1	53121	231135	56851.8	21.2633
26.31	52077	70096	61831	87850	97839	144187	127636	60614	87766.2		105229	108394	50763	49372	84127	79577	26.31	115	0		14745	4080	79936	110887	84622	38376	55441	26.31	115	0		85460	104305	81527	67989	89303	53081	80277.5	26.31	115	0		1	15125	104018	148046	83976	70233.2	26.31
17.0592	127332	231744	69996	73424	5821	103543	59303	119234	98799.6		10605	72910	23754	17484	78318	40614.2	17.0592	116	0		147443	4105	14441	18259	60173	47589	48668.3	17.0592	116	0		265721	42660	6353	264962	2949	208194	131806	17.0592	116	0		1	45398	66679	58412	26195	39337	17.0592
17.4233	179937	210118	255121	1	302819	1	1	1	118500		1	1	199870	193924	229744	124708	17.4233	87	0		1	1	223871	1	29	122254	57692.8	17.4233	87	0		1	289566	1	1	314847	206382	135133	17.4233	87	0		486	1	1	1	1	98	17.4233
18.3475	1	82336	84988	1	67324	128807	221322	119893	88084		37133	63883	75438	73791	125910	75231	18.3475	131	0		1	6984	98741	66185	72404	260705	84170	18.3475	131	0		86351	190791	97081	73190	67152	100544	102518	18.3475	131	0		17359	136880	117336	58011	114950	88907.2	18.3475
21.3025	1	1	1	1	1376954	1	1	1	172120		1	1	1	1	1	1	21.3025	84	0		1	1	1	1	1	1	1	21.3025	84	0		1	1	1	1	1	1	1	21.3025	84	0		4506	1	1	1	1	902	21.3025
10.3842	1	114023	1	1	149062	223847	1	1	60867.1		481398	160059	1	1	123157	152923	10.3842	101	0		125626	1	135325	1	1	1	43492.5	10.3842	101	0		1	162738	1	129308	152167	1	74036	10.3842	101	0		4399	240024	1	215639	1	92012.8	10.3842
8.0575	1867	190507	1	1	172697	1	1	192644	69714.9		431629	193419	193035	195064	1	202630	8.0575	117	0		1	1	1	1	1	1	1	8.0575	117	0		1	1	1	200859	1	198922	66630.8	8.0575	117	0		1	1	1	210733	61009	54349	8.0575
21.9958	97268	76401	79155	44989	39507	68833	37931	61649	63216.6		258	148794	192663	153408	116142	122253	21.9958	117	0		104641	1	80094	61492	32530	78088	59474.3	21.9958	117	0		122464	138114	64331	246649	76466	102663	125114	21.9958	117	125114		1	20897	169588	78670	52704	64372	21.9958
14.1183	45919	10100	100878	113630	104287	157006	121493	1	81664.2		184174	120985	61398	1	1	73311.8	14.1183	66	0		1	1	66693	129311	1	1679	32947.7	14.1183	66	0		1	110127	161604	54350	120255	1	74389.7	14.1183	66	0		2395	156945	108621	188494	142318	119755	14.1183
10.5358	1	1	22011	23082	24729	22616	1	28254	15086.9		14100	1	1	34199	1140854	237831	10.5358	117	0		32187	5956	1	1	1	929865	161335	10.5358	117	0		1	1	586154	1	1	1	97693.2	10.5358	117	0		1	15516	1	1	1	3104	10.5358
19.5142	1	1	96131	189887	87602	1	57932	132252	70475.9		1780	1	85355	70728	1	31573	19.5142	98	0		351757	1	1	1	106803	69044	87934.5	19.5142	98	0		194876	143066	1	159509	1	1	82909	19.5142	98	0		1928	162691	151426	1	60633	75335.8	19.5142
9.12333	207217	1	1	5674	1	1	1	1	26612.1		127493	1	1	1	1	25499.4	9.12333	73	0		1	1	1	1	1	1	1	9.12333	73	0		1	687215	1049406	1	1	245563	330364	9.12333	73	0		1	1	1	1	201561	40313	9.12333
22.2892	151817	1	122385	1	1	1	205761	1	59996		544721	1	1	94577	1	127860	22.2892	132	0		1	1	1	212341	200884	1	68871.5	22.2892	132	0		1	184518	190070	1	1	90489	77513.3	22.2892	132	0		1	1	202070	262155	1	92845.6	22.2892
18.35	213256	1	109649	159043	77860	99804	161507	145792	120864		37115	103030	1	1	157664	59562.2	18.35	61	0		1	3465	1	85609	1	1	14846.3	18.35	61	-106018		159484	148132	58820	128621	112042	1	101183	18.35	61	0		7360	108368	138473	87401	147302	97780.8	18.35
14.06	60486	76653	91703	122849	75280	132068	51948	86086	87134.1		12101	111391	93643	76842	89086	76612.6	14.06	209	0		94048	3446	84822	108661	114993	52126	76349.3	14.06	209	0		85893	118870	1	98823	107613	1	68533.5	14.06	209	0		1383	117064	109049	6877	146752	76225	14.06
8.0625	4245	114599	121541	1	126084	1	124489	122008	76621		348662	128874	112826	117174	66437	154795	8.0625	72	0		1	1	134583	161712	148896	65940	85188.8	8.0625	72	0		112677	1088	1	127750	1	111683	58866.7	8.0625	72	0		1	2033	1	162276	1781	33218.4	8.0625
11.6158	37360	96544	83501	98362	28242	127271	49290	53683	71781.6		57565	109679	84163	105089	115480	94395.2	11.6158	64	0		120168	1	94072	68037	72904	102957	76356.5	11.6158	64	0		94617	132170	1	92938	107970	112950	90107.7	11.6158	64	0		1	123937	125176	1	174183	84659.6	11.6158
19.7358	2839	1392	6682	350	1744	1384	446	1218	2006.88		338	1391	791	103	1502	825	19.7358	175	0		1114	3450	2880	1559	708	1	1618.67	19.7358	175	0		5396	1684	603	960	1134	299	1679.33	19.7358	175	0		2837303	2573	1624	207	1020	568545	19.7358
26.8733	92192	1	1	46831	1	1	119373	159880	52285		28557	61958	1	1	114064	40916.2	26.8733	73	0		37777	139818	96355	1	654	170935	74256.7	26.8733	73	0		106748	101365	255324	1	1	91763	92533.7	26.8733	73	0		596069	116262	143268	1	126066	196333	26.8733
26.3008	67614	64223	75899	82609	94237	145728	128063	70444	91102.1		88751	113751	68038	65559	89388	85097.4	26.3008	163	0		11473	3195	84622	109269	77085	1	47607.5	26.3008	163	0		84494	116274	102763	1	82172	62859	74760.5	26.3008	163	0		1	12083	119420	166876	77014	75078.8	26.3008
28.715	140748	13368	56898	24675	35630	32309	28302	58136	48758.2		5498	24868	32859	34983	16573	22956.2	28.715	117	0		26574	1	49392	55234	23015	50727	34157.2	28.715	117	0		38287	58414	194268	22839	19582	15882	58212	28.715	117	0		1477182	14888	30937	23647	38839	317099	28.715
18.9617	1	443822	1	1	288764	1	1	1	91574		1	1	457612	18108	133634	121871	18.9617	73	0		315362	1	1	1	1	1	52561.2	18.9617	73	0		1	1	134451	1	1	1	22409.3	18.9617	73	0		30252	503962	1	1	1	106843	18.9617
19.4467	42083	56147	98926	1	94896	160423	90833	101858	80645.9		56956	154853	74679	1	72468	71791.4	19.4467	60	0		51519	1	71765	125461	1	14664	43901.8	19.4467	60	0		112747	118316	157074	99747	121838	44986	109118	19.4467	60	0		1	151529	125028	192783	90047	111878	19.4467
22.3883	1	210589	246490	1	282165	1	346703	1	135744		1	302000	1	208523	1	102105	22.3883	149	0		1	248	1	1	1	1	42.1667	22.3883	149	-135702		1	1	1	1	291660	1	48610.8	22.3883	149	0		1206	1	305161	1	1	61274	22.3883
9.4425	1	1	51986	1	24920	83572	81633	1	30264.4		122717	32833	1	1	157951	62700.6	9.4425	148	0		1	227178	33345	54475	41186	10932	61186.2	9.4425	148	0		699346	1	17348	537153	33401	1	214542	9.4425	148	0		10964	67590	1	98737	82404	51939.2	9.4425
14.0192	121831	110068	63666	70259	187185	84260	115871	107514	107582		49906	101027	88758	110126	113458	92655	14.0192	100	0		42006	1	154346	10052	69201	239893	85916.5	14.0192	100	0		57883	116304	13688	64682	76580	1	54856.3	14.0192	100	54856.3		1278	47346	117641	91544	64823	64526.4	14.0192
22.7417	1	1	1	1	1	1	1	1	1		1	1	1	1	1	1	22.7417	73	#DIV/0!		1	1	1019820	1	1	772020	298641	22.7417	73	0		1	1	1	1	1	1	1	22.7417	73	#DIV/0!		1	1	1	1	1	1	22.7417
22.335	98241	1	106338	136046	1	176633	1	103691	77619		1	1	100985	98734	106616	61267.4	22.335	117	0		103212	225	115207	1	133985	65424	69675.7	22.335	117	0		1	142056	160959	128112	126339	84929	107066	22.335	117	0		201	231456	1	1	1	46332	22.335
18.0292	1	1	1	612956	1	1	1	334676	118455		6609	1	385399	1	1	78402.2	18.0292	74	0		1	1	1	1	1	465616	77603.5	18.0292	74	0		1	1	1	1	1	1	1	18.0292	74	0		1	1	1	1	218254	43651.6	18.0292
19.6742	1	234617	1	1	214332	1	1	1	56119.4		1	149394	1	104124	104366	71577.2	19.6742	73	0		15790	1	1	1	1	547890	93947.3	19.6742	73	0		283107	305198	110390	251530	71583	1	170302	19.6742	73	0		1	1	1	169930	1	33986.8	19.6742
9.6125	27906	106396	45300	39604	65166	90123	121045	124608	77518.5		1	104151	135046	159643	147195	109207	9.6125	147	0		1	158075	1	220766	164702	1	90591	9.6125	147	0		70978	1	60578	149072	1	49027	54942.8	9.6125	147	0		1	123846	113290	84617	96074	83565.6	9.6125
8.21667	1184890	3556	1	1	5216	5648	1	4432	150468		19557	4244	2877	4762	2252	6738.4	8.21667	175	0		1	1	2960	8420	7532	1	3152.5	8.21667	175	0		1	1	1	4826	4845	1	1612.5	8.21667	175	0		1	1	1	9129	19	1830.2	8.21667
22.2758	64085	1	77695	105056	1	124941	132976	78713	72933.5		275502	88908	63746	60203	1	97672	22.2758	227	0		75946	1	72530	105973	98175	1	58771	22.2758	227	0		67521	105101	1	89077	86719	1	58070	22.2758	227	0		1	172107	118186	138653	144140	114617	22.2758
26.5725	132233	30868	131909	33430	53817	72445	64073	130418	81149.1		38527	132086	142039	106597	98714	103593	26.5725	189	0		5712	1053	63386	56021	36403	105855	44738.3	26.5725	189	0		54494	130568	228902	142661	39536	58719	109147	26.5725	189	0		1	5833	111103	185809	35536	67656.4	26.5725
22.2642	67832	71906	88211	108779	87073	1	136756	1	70069.9		350325	93771	66396	62152	1	114529	22.2642	146	0		1	1	78264	117608	113343	1	51536.3	22.2642	146	0		71302	111769	119552	1	89465	60778	75477.8	22.2642	146	0		1	180601	125803	159686	1	93218.4	22.2642
26.2542	236238	1	1	1	1	1	1	1	29530.6		1	991592	1	1	1	198319	26.2542	75	0		1	1	1	1	1	1	1	26.2542	75	0		1	1	1	1	1	397797	66300.3	26.2542	75	0		10171	1	1	1	1	2035	26.2542
19.4225	57465	47378	1	1	1	103304	76964	53933	42380.9		1	1	186461	129252	43428	71828.6	19.4225	148	0		124401	1	85761	297861	1	99093	101186	19.4225	148	0		67273	78953	1	68215	1	40933	42562.7	19.4225	148	0		1	451871	91709	432895	77376	210770	19.4225
8.80083	93537	120581	137871	47841	1	89868	70540	119230	84933.6		78281	123353	134749	113756	1	90028	8.80083	79	0		55875	1	86658	179013	1	120880	73738	8.80083	79	0		1	1	111302	138956	130450	151776	88747.7	8.80083	79	0		1	1	15803	91798	1	21520.8	8.80083
18.1783	219246	1	447842	1	1	1	1	1	83386.8		1	1	1	1	1	1	18.1783	61	0		1	1	1	1	584551	1	97426	18.1783	61	0		1	1	1	434785	536434	1	161870	18.1783	61	0		1	1	1	1	1	1	18.1783
21.9308	1	1	138087	99249	1	102963	68080	174584	72870.8		29961	1	1	1	1	5993	21.9308	103	0		500823	595	227968	80953	1	1	135057	21.9308	103	0		250166	199364	89698	1	163322	1	117092	21.9308	103	0		3290	38786	377288	1	117248	107323	21.9308
8.745	138551	1	1	1	1	1	1	1	17319.8		1	1	1	1	1	1	8.745	147	0		1	229433	1	1	1	1	38239.7	8.745	147	0		1	64558	100472	1	1	1	27505.7	8.745	147	0		1	2063348	1	1	1	412670	8.745
17.4633	1	1	1	134527	87628	166870	147546	104193	80095.9		134214	123715	1	1	68061	65198.4	17.4633	88	0		100470	33326	98966	138626	55800	45744	78822	17.4633	88	0		91046	1	105912	77843	1	1	45800.7	17.4633	88	0		1	1	117617	1	183041	60132.2	17.4633
24.9133	1	125068	171475	52645	234766	88479	30086	157393	107489		2276	81086	136304	94415	1	62816.4	24.9133	72	0		101986	1	138899	1	72586	1	52245.7	24.9133	72	0		163243	130601	136575	158269	186491	105646	146804	24.9133	72	0		2823	1	68085	13887	1	16959.4	24.9133
24.6008	365151	243879	203848	1	1	1	1	1	101610		1	126751	106138	1	1	46578.4	24.6008	73	0		1	1	280690	1	1	1	46782.5	24.6008	73	0		286433	151184	1	217095	3357	325870	163990	24.6008	73	0		12073	49654	1	1	84847	29315.2	24.6008
26.2575	1	1	1212348	1	1	1	1	1	151544		1	1	1	1	1	1	26.2575	205	0		1	1	1	1	1	1	1	26.2575	205	0		1	1	1569082	1	1	1	261514	26.2575	205	0		6655	1	1	1	1	1331.8	26.2575
10.6733	1	1	1	1	1	1	1	1	1		1	1	1	1	1	1	10.6733	147	#DIV/0!		1	1	1	1	1	1	1	10.6733	147	#DIV/0!		1	1	111725	1	1	2245364	392849	10.6733	147	0		4741	425742	1	1	1	86097.2	10.6733
14.4642	1	364244	1	1	1	1	1	1	45531.4		92310	1	1	1	1	18462.8	14.4642	73	0		1	43505	1	1	1	1	7251.67	14.4642	73	0		1	1	1	1	349622	1	58271.2	14.4642	73	0		11592	412002	327231	1	437878	237741	14.4642
26.0267	1	1	742172	1	1	1	1	1	92772.4		1	1	1	456692	686007	228540	26.0267	103	0		1	1	1	1	1	1	1	26.0267	103	0		1	1	1	1	1	426750	71125.8	26.0267	103	0		1	1	1	1	1	1	26.0267
14.92	1	1	1	1087014	1	1	1	19576	138324		12749	21099	1	1	1	6770.2	14.92	133	0		859374	1124	1	18565	1	730665	268288	14.92	133	0		2368	1	5339	1	1	2612	1720.33	14.92	133	0		417	1	1	1	4517	987.4	14.92
12.9275	208091	1	1	88141	1	70219	156442	76268	74895.5		1	90987	26247	156015	80464	70742.8	12.9275	73	0		100007	121835	103526	43458	115848	1	80779.2	12.9275	73	0		1	154055	98724	108500	61223	148449	95158.7	12.9275	73	0		1	143952	1	33377	144496	64365.4	12.9275
12.0317	64031	111224	138102	66399	29033	75496	66121	90405	80101.4		81110	93452	78102	78697	85548	83381.8	12.0317	133	0		124437	53308	74061	80053	77922	70263	80007.3	12.0317	133	0		125970	63278	41561	63775	67167	154000	85958.5	12.0317	133	0		29294	44628	95922	37716	108736	63259.2	12.0317
24.9342	59060	81432	98874	32054	1	33355	23705	84151	51579		13277	69399	69136	66357	83110	60255.8	24.9342	149	0		88173	1	87354	545343	42238	151698	152468	24.9342	149	0		64712	87695	199178	81049	74390	67317	95723.5	24.9342	149	0		1	230094	38058	56104	25763	70004	24.9342
12.6358	68666	100428	124992	1	6333	1	200357	116282	77132.5		1	171480	81280	75852	93882	84499	12.6358	60	0		1	1	76178	1	169894	65717	51965.3	12.6358	60	0		80772	155149	7535	1	1	68152	51935	12.6358	60	0		7304	259873	171172	1	221921	132054	12.6358
23.5017	14667	50004	73455	42939	566575	31743	84001	95059	119805		1	104026	1	30733	28440	32640.2	23.5017	73	0		94614	4623	12498	119271	189507	308334	121474	23.5017	73	0		1	24927	1	81202	1	130855	39497.8	23.5017	73	0		26006	35964	178735	168136	48971	91562.4	23.5017
9.2925	42681	171853	1	101940	23413	1	1	144985	60609.4		26339	1	42560	35278	1	20835.8	9.2925	89	0		82266	1	1	73384	1	117645	45549.7	9.2925	89	0		1	1	13001	1	1	515945	88158.3	9.2925	89	0		1	24207	1	1	1	4842.2	9.2925
24.8742	207296	264977	311507	1	12323	65011	1	138339	124932		1	33027	141809	1	1	34967.8	24.8742	265	0		83793	1	99462	110043	48637	158035	83328.5	24.8742	265	0		395640	1	1	145498	105250	1	107732	24.8742	265	0		1	1	1	1	18981	3797	24.8742
22.2183	1	1	1	1	1	1	250620	164210	51854.5		1	1	127070	1	161631	57740.8	22.2183	117	0		168017	1	124194	1	1	1	48702.5	22.2183	117	0		158720	1	1	179812	199891	99226	106275	22.2183	117	0		1	345798	1	1	283490	125858	22.2183
8.96583	1	160931	175757	1	1	92291	1	165354	74292.1		1	198323	211804	179068	1	117839	8.96583	79	0		1	1	130977	225783	143386	1	83358.2	8.96583	79	0		186041	1	1	196185	161542	219408	127196	8.96583	79	0		1	1	1	115413	31240	29331.2	8.96583
20.995	1	164598	150748	132837	287467	85114	88025	56745	120692		2864	58628	1	261537	128544	90314.8	20.995	147	0		145330	1153	1	149700	76873	1	62176.3	20.995	147	0		97166	61049	44704	83373	1	1	47715.7	20.995	147	0		1	103758	45566	123551	1	54575.4	20.995
21.1817	1	1	1	1	1	1	1	1	1		115406	1	1243832	1	1	271848	21.1817	75	0		1	3676	1	1	1	684816	114749	21.1817	75	0		1	1	1	1	1	1	1	21.1817	75	#DIV/0!		1	198521	1	1	1	39705	21.1817
14.4475	55177	201015	135200	227766	1	1	131035	1	93774.5		1	1	114665	1	1	22933.8	14.4475	299	0		178976	1	1	1	208903	237083	104161	14.4475	299	0		156337	159869	1	1	134969	1	75196.3	14.4475	299	0		1	132333	1	1	1	26467.4	14.4475
19.595	1	1	187436	130072	133737	1	49047	112563	76607.2		1	1	94824	103695	1	39704.4	19.595	84	0		182010	1	1	314447	221121	57185	129128	19.595	84	0		125405	1	82696	130514	207619	1	91039.3	19.595	84	0		51304	1	77092	116241	118016	72530.8	19.595
22.64	1	1	1	1	1	1	1	1	1		1	1	1	1	1	1	22.64	73	#DIV/0!		1	1294	1	1	1	1	216.5	22.64	73	0		1	515705	771135	1	1	1	214474	22.64	73	0		1	1	357007	1	1	71402.2	22.64
18.2617	1	206455	1	323026	1	1	1	274358	100480		3670	1	188154	1	1	38365.4	18.2617	64	0		247812	1	227079	1	1	146916	103635	18.2617	64	0		256634	1	1	223002	1	181228	110144	18.2617	64	0		1918	1	1	1	1	384.4	18.2617
25.0033	1	125833	164936	1	1	1	28712	148862	58543.4		15894	87082	1	122467	146074	74303.6	25.0033	133	0		107684	1	158700	541776	1	166837	162500	25.0033	133	0		136731	1	1	1	1	109542	41046.2	25.0033	133	0		460	244732	1	65474	32011	68535.6	25.0033
18.6467	1	1	1	217078	1	1	112370	1	41181.8		55929	1	189177	191747	1	87371	18.6467	100	0		296701	1	1	1	1	565367	143679	18.6467	100	0		1	1	133813	146910	1	1	46787.8	18.6467	100	0		1	1	139851	1	1	27971	18.6467
18.7892	82980	86273	94214	106067	39687	128017	143806	71388	94054		61300	91395	55648	52841	91772	70591.2	18.7892	235	0		85384	15205	1	35789	101700	60948	49837.8	18.7892	235	-44216.2		86462	72157	99690	97122	97164	84701	89549.3	18.7892	235	0		1	1	121275	74510	132717	65700.8	18.7892
19.1292	454820	1	1	1	1	1	105798	1	70078		1	1	1	1	1	1	19.1292	73	0		1	1	1	1	1	1	1	19.1292	73	0		1	1	1	1	1	1	1	19.1292	73	0		1448987	1	1	1	1	289798	19.1292
14.0575	53883	68951	81710	107890	67900	118350	46905	76136	77715.6		17075	98089	83548	68270	78961	69188.6	14.0575	227	0		83156	496	76159	97608	102208	45512	67523.2	14.0575	227	0		76123	105424	48698	87071	95276	45996	76431.3	14.0575	227	0		1	106566	98371	1	131772	67342.2	14.0575
21.2883	1	216959	266947	250601	249827	1	1	1	123042		1	1	173120	178127	245488	119347	21.2883	115	0		1	1	175390	1	1	186796	60365	21.2883	115	0		1	93433	1	1	280215	1	62275.3	21.2883	115	0		1	1	1	1	1	1	21.2883
14.3292	1	1	40966	1	165887	117990	64815	32050	52713.9		25707	134584	39688	13066	146785	71966	14.3292	75	0		1	252960	167837	1	147898	111164	113310	14.3292	75	0		106043	122123	27067	100217	152259	1	84618.3	14.3292	75	0		35942	85952	128452	11651	121619	76723.2	14.3292
18.385	1	1	1	1	176793	171368	277097	1	78157.9		71218	1	1	1	1	14244.4	18.385	102	0		1	196	1	1	1	346930	57855	18.385	102	0		1	187110	104884	1	244498	1	89415.8	18.385	102	0		913	1	236130	1	277460	102901	18.385
26.2908	55288	61982	60809	81043	85443	128229	115389	60353	81067		95309	98749	1	1	77222	54256.4	26.2908	134	0		13462	3572	75410	98768	73478	44514	51534	26.2908	134	0		76673	98412	100927	71543	78759	53758	80012	26.2908	134	0		1	13965	99978	139358	76062	65872.8	26.2908
19.6725	71185	1	1	299903	1	1	11840	1	47866.6		1	185302	1	1	1	37061.2	19.6725	73	0		1	5070	1	652165	1	1	109540	19.6725	73	0		1	258396	206115	1	57103	369553	148528	19.6725	73	0		1	1	222406	1	63510	57183.8	19.6725
22.3583	1	1	1	1	277699	1	1	1	34713.2		1	1	1	1	226048	45210.4	22.3583	149	0		1	1	230484	296812	285811	148085	160199	22.3583	149	0		1	1	1	1	1	185725	30955	22.3583	149	0		1	1	1	407051	394767	160364	22.3583
10.6233	1	1	1	12531	1	18735	8802	1	5009.12		1	1	3781	1	7651	2287	10.6233	102	0		13233	1	1	1	1	1	2206.33	10.6233	102	0		5890	13408	2324792	10225	1	126476	413465	10.6233	102	0		6609	13201	1	39103	1	11783	10.6233
21.81	22696	60761	48277	161948	28429	29329	62877	96183	63812.5		5678	46669	60074	85983	89164	57513.6	21.81	175	0		338670	1	34097	18671	34327	370294	132677	21.81	175	0		82789	135584	14611	42591	28022	50721	59053	21.81	175	0		1	100981	91474	31057	57739	56250.4	21.81
29.9825	1	110510	191181	17129	1	24311	85329	48073	59566.9		1	238701	1	101861	41668	76446.4	29.9825	73	0		10624	2355	1	1	8989	1	3661.83	29.9825	73	0		1	252755	1	1	1	20339	45516.3	29.9825	73	0		1	6495	265495	64323	165014	100266	29.9825
18.0833	1	238931	111505	163840	43480	92551	32689	91589	96823.2		1	46503	85017	119778	241232	98506.2	18.0833	174	0		176146	2952	56929	1	1	171677	67951	18.0833	174	0		93921	1	61295	1	1	106444	43610.5	18.0833	174	0		1	116847	302728	44223	1	92760	18.0833
19.4183	81654	169739	1	1	120208	137095	1	1	63587.5		24805	137305	88556	78496	267332	119299	19.4183	98	0		115389	1	84500	132151	125778	56173	85665.3	19.4183	98	0		1	1	88281	1	123167	190896	67057.8	19.4183	98	0		5599	204583	1	186969	1	79430.6	19.4183
26.5742	110512	28470	134443	30830	50272	64977	57896	129775	75896.9		33462	127731	123495	105191	97629	97501.6	26.5742	101	0		4957	1303	59410	51565	31679	97765	41113.2	26.5742	101	0		51916	129800	178448	140955	33797	55031	98324.5	26.5742	101	0		1	5093	108055	171556	31895	63320	26.5742
12.8367	117888	81387	70016	97431	1	119781	121317	80313	86016.8		49226	74030	62520	84339	94731	72969.2	12.8367	148	0		56457	1	104094	71638	71250	95741	66530.2	12.8367	148	0		75138	56528	89370	59553	101848	99995	80405.3	12.8367	148	0		3982	59704	37660	114270	71467	57416.6	12.8367
18.8117	71059	99286	125571	216789	1	1	1	170123	85353.9		7202	1	2104	95427	98586	40664	18.8117	103	0		114180	12218	5750	1	204022	1	56028.7	18.8117	103	0		98781	1	1	172515	1	89912	60201.8	18.8117	103	0		2329	1	222455	1	289944	102946	18.8117
24.9183	143157	151148	216458	1	190070	1	1	206834	113459		51	1	1	140179	208928	69832	24.9183	114	0		79606	1	191583	156921	1	81429	84923.5	24.9183	114	0		172940	122556	7904	1	215375	137096	109312	24.9183	114	0		1	1	48985	2095	2593	10735	24.9183
20.39	295809	206542	70409	90067	167193	1	11627	96586	117279		1	1	205857	334071	1	107986	20.39	73	0		1	2046	1	297249	1	53026	58720.7	20.39	73	0		1	63233	313697	1	1	186515	93908	20.39	73	0		1	1	1	1	75855	15171.8	20.39
8.87167	2448125	1	1	1	1	29150	1	1	309660		1	1	1	1	1	1	8.87167	72	0		1	1	1	1	1	1	1	8.87167	72	0		1	40312	1	1	1	1	6719.5	8.87167	72	0		23423	1	29726	1	38411	18312.4	8.87167
10.6142	1	1	1	105	1	1	16	1	15.875		1	1	1	1	1	1	10.6142	258	0		1	1	1	1	1	341	57.6667	10.6142	258	0		1	1	2149214	1	1	1	358203	10.6142	258	0		1	1	69	5	1	15.4	10.6142
18.325	187873	1	127160	1	1	1	1	1	39379.9		26031	107734	1	229974	1	72748.2	18.325	72	0		174024	1	138389	98409	116026	1	87808.3	18.325	72	0		1	63291	34728	125927	129664	1	58935.3	18.325	72	0		15571	179694	1	101248	128026	84908	18.325
18.445	1	1	1	1	1	1	794791	1	99349.8		318453	1	1	1	1	63691.4	18.445	73	0		1	40593	1	751125	1	1	131954	18.445	73	0		1	1	1	1	1	1	1	18.445	73	0		23689	589669	1	1	1	122672	18.445
15.9217	58407	82618	40417	112493	1	26065	56318	74400	56339.9		19527	34810	66344	120370	169358	82081.8	15.9217	114	0		145660	8210	63190	1	22538	504991	124098	15.9217	114	0		53925	99582	23654	38506	27221	113023	59318.5	15.9217	114	0		1	59257	101684	1	48902	41969	15.9217
25.9725	83387	83742	107131	61897	19895	115426	86197	102330	82500.6		44366	132133	94006	1	1	54101.4	25.9725	130	0		11123	3142	86556	100414	17386	63316	46989.5	25.9725	130	0		97039	125374	144797	124022	85534	1	96127.8	25.9725	130	0		1	5085	136945	30179	67702	47982.4	25.9725
17.47	1	1	717779	1	1	1	1	1	89723.2		1	1	1	1	560559	112113	17.47	75	0		1	1	1	1	1	362437	60407	17.47	75	0		1	1	1	1	949033	1	158173	17.47	75	0		1	1	1	1	1	1	17.47
19.3825	86628	109011	1	1	296272	1	1816	1	61716.4		10525	297751	1	1	121674	85990.4	19.3825	70	0		177045	1122	138196	1	302876	85876	117519	19.3825	70	0		1	1	1	1	312239	96617	68143.3	19.3825	70	0		1	546129	1	1	1	109227	19.3825
9.25833	1	1	48503	1	1	104526	96321	1	31169.4		1	49643	1	1	424127	94754.6	9.25833	174	0		1	1	207118	84730	30949	11140	55656.5	9.25833	174	0		371765	200305	4998	480685	20954	1	179785	9.25833	174	0		114032	1	157998	25213	54874	70423.6	9.25833
17.4483	1	52826	81227	95787	41194	148119	120676	71950	76472.5		175966	100414	1	1	1	55276.6	17.4483	66	0		58262	44400	1	110914	52198	1	44296	17.4483	66	0		80260	78026	108580	79640	96159	1	73777.7	17.4483	66	0		255	92334	92482	99168	1	56848	17.4483
12.6942	47194	25720	45417	72500	1405	134937	80066	45801	56630		272356	69208	39305	37573	31915	90071.4	12.6942	77	0		45142	316528	47958	83677	68010	22967	97380.3	12.6942	77	0		46607	58174	25460	52154	1	1	30399.5	12.6942	77	0		13653	120988	73831	134148	85529	85629.8	12.6942
21.4233	1	76588	1	136215	91241	168839	109513	1	72799.9		360	107881	89675	67186	1	53020.6	21.4233	102	0		96961	1	86451	110288	103830	87624	80859.2	21.4233	102	0		1	109714	112934	78649	1	83991	64215	21.4233	102	0		1	86708	101849	70120	101452	72026	21.4233
17.4458	61194	63046	72793	86184	83098	93709	87539	68870	77054.1		81534	71592	65393	60708	70679	69981.2	17.4458	173	0		61984	17910	74641	91480	38784	52379	56196.3	17.4458	173	0		56748	91373	62286	51804	88313	61243	68627.8	17.4458	173	0		1	48704	76263	57504	109091	58312.6	17.4458
24.9242	106203	108730	142312	36934	139011	66815	22434	133733	94521.5		1	56130	118122	100694	134328	81855	24.9242	132	0		63413	1	130536	122849	52172	91531	76750.3	24.9242	132	0		118507	94723	19815	111662	144087	99107	97983.5	24.9242	132	0		1	1	43402	1	18698	12420.6	24.9242
21.9883	249226	237423	1	1	77243	1	1	1	70487.1		1318	139528	285295	424055	147118	199463	21.9883	75	0		1	3088	1	1	1	193057	32691.5	21.9883	75	0		1	1	1	1	1	223385	37231.7	21.9883	75	0		5782	5482	1	77857	1	17824.6	21.9883
14.7775	32965	43659	64855	82539	76867	101887	101067	62010	70731.1		77854	78872	55183	40791	54857	61511.4	14.7775	85	0		59588	14475	64992	83228	86142	29196	56270.2	14.7775	85	0		43467	76854	94953	70714	78063	36787	66806.3	14.7775	85	0		7475	127227	88905	110946	110762	89063	14.7775
18.3775	1	1	1	1	152425	143411	231275	1	65889.5		61643	1	1	1	1	12329.4	18.3775	115	0		1	1638	1	1	1	314283	52654.2	18.3775	115	0		1	177392	81827	1	197565	1	76131.2	18.3775	115	0		3449	1	210006	1	241332	90957.8	18.3775
17.26	106977	221630	34265	40041	7862	52953	40932	75652	72539		5847	88896	3982	13593	61157	34695	17.26	70	0		79671	21594	1	1	32793	57426	31914.3	17.26	70	0		285972	26206	14245	313044	8471	173695	136939	17.26	70	0		8437	38747	58527	43306	19110	33625.4	17.26
30.74	113247	72741	74048	30906	19639	109268	13057	60615	61690.1		481	111397	296074	150613	173946	146502	30.74	73	0		13117	1	86443	1	29168	126648	42563	30.74	73	0		112390	60754	106206	279274	50984	1	101602	30.74	73	0		1	2429	54137	15675	8223	16093	30.74
14.2217	1	657844	1	1	1	1	1	1	82231.4		1	1	1	1	1	1	14.2217	211	0		678714	1	1	1	1	567208	207654	14.2217	211	0		1	1	1	74871	1	530515	100898	14.2217	211	0		1	1	1	8437	1	1688.2	14.2217
21.365	63305	70651	74508	113184	79858	156119	94984	81224	91729.1		92	83222	62704	57927	79054	56599.8	21.365	112	0		75008	1	81381	93516	71238	57704	63141.3	21.365	112	0		54590	85570	112681	55800	85655	66070	76727.7	21.365	112	0		1	87992	84688	57415	75361	61091.4	21.365
22.3758	1	1	140428	1	1	1	215953	125077	60182.9		1	1	121706	120921	1	48526	22.3758	60	0		1	1	143923	161675	165307	1	78484.7	22.3758	60	0		1	1	1	1	157787	1	26298.7	22.3758	60	0		1	1	196099	228966	220083	129030	22.3758
19.4008	1	1	1	1	282288	1	1	1	35286.9		7282	313759	1	193600	1	102929	19.4008	72	0		269633	1	271116	1	264823	1	134262	19.4008	72	0		1	1	1	1	288659	177241	77650.7	19.4008	72	0		3355	433443	1	1	1	87360.2	19.4008
10.3417	81887	91751	96881	1	1	1	149412	92228	64020.2		1	117798	93268	89405	101516	80397.6	10.3417	70	0		98439	1	101463	1	1	88044	47991.5	10.3417	70	0		90553	1	1	98930	116665	1	51025.2	10.3417	70	0		3364	1	1	1	163457	33364.8	10.3417
18.1333	85583	119453	1	1	144123	72956	65445	130323	77235.6		9520	161279	1	102489	127838	80225.4	18.1333	88	0		1	1	120232	111966	1	1	38700.3	18.1333	88	0		1	95504	28562	1	166157	88970	63199.2	18.1333	88	0		1	66779	1	114105	165799	69337	18.1333
10.1967	1	42549	1	42913	24148	22375	82364	39640	31748.9		97551	54535	13123	24573	32307	44417.8	10.1967	75	0		56861	1	37842	1	1	18190	18816	10.1967	75	0		1	48006	1354714	1	38738	1	240244	10.1967	75	0		1	67915	2000	57327	39460	33340.6	10.1967
23.2842	1	201321	85796	94441	1	1	1	156129	67211.4		1	1	1	351019	1	70204.6	23.2842	73	0		193799	27148	1	134159	280193	231964	144544	23.2842	73	0		1	1	1	1	1	270385	45065	23.2842	73	0		36138	63727	1	188105	57059	69006	23.2842
24.9475	116898	1	146913	23251	1	28286	14825	131748	57740.4		1	102342	199644	84981	160421	109478	24.9475	103	0		46615	1142	128483	154502	39944	101649	78722.5	24.9475	103	0		136294	91397	61676	159271	156060	68271	112162	24.9475	103	0		1	57225	38305	1	27829	24672.2	24.9475
8.89083	1	94612	1	112816	87493	104020	1	100808	62469		1	100073	92290	91409	95730	75900.6	8.89083	208	0		181791	1	113936	115422	125977	1	89521.3	8.89083	208	0		1	1	1	1	1	108617	18103.7	8.89083	208	0		1	1	1	137293	409	27541	8.89083
18.7542	24680	1	75660	86502	51416	116862	108670	70032	66727.9		86065	91050	49937	38270	1	53064.6	18.7542	87	0		55988	23488	51051	49120	90834	1	45080.3	18.7542	87	0		65802	78727	101046	71539	85994	1	67184.8	18.7542	87	0		2402	135967	95283	97500	127876	91805.6	18.7542
19.4275	1	1	1	1	151270	556354	1	1	88453.8		159831	162563	115180	156981	1	118911	19.4275	230	0		243833	1	1	1	1	195394	73205.2	19.4275	230	0		1	1	1	1	1	1	1	19.4275	230	0		1	1	1	1	1	1	19.4275
12.2758	1	1	120231	1	51100	7868	30026	1	26153.6		1	123182	181651	1	256011	112169	12.2758	147	0		1	1	114277	148103	1	447797	118363	12.2758	147	0		1	127810	1	1	74024	1	33639.7	12.2758	147	0		1	1	1	15527	1	3106.2	12.2758
24.8983	501493	1	1	1	1	1	92779	1	74284.8		77	245867	643909	1	1	177971	24.8983	100	0		1	1	1	1	1	437149	72859	24.8983	100	0		1	1	45	1	1	1	8.33333	24.8983	100	0		1266	382	1	17313	76966	19185.6	24.8983
9.39	1	1	1	1	1	1	1	1	1		1	1	1	1	1	1	9.39	73	#DIV/0!		1	1	1	1	1	1	1	9.39	73	#DIV/0!		1	1012260	1	1	1	1	168711	9.39	73	0		1045809	102732	53712	1	1	240451	9.39
36.3233	327303	1	200587	1	92958	113585	1	1	91804.6		1	92419	274613	1	112809	95968.6	36.3233	73	0		152191	1	223576	10173	1	179620	94260.3	36.3233	73	0		1	1	2927	1	257817	1	43458	36.3233	73	0		141246	528	1	1	1	28355.4	36.3233
21.4442	1	115556	68412	61650	213363	73032	74784	139210	93251		5881	43461	46508	1	202911	59752.4	21.4442	218	0		64473	1	1	1	52976	200238	52948.3	21.4442	218	0		72540	136558	1	78562	81134	105993	79131.3	21.4442	218	0		1	37223	94635	47290	46735	45176.8	21.4442
13.7675	10062	1	1	51315	34652	47644	186424	127496	57199.4		85458	151128	59474	60977	1	71407.6	13.7675	73	0		1	86416	99438	1	93290	1	46524.5	13.7675	73	0		1	69445	34231	90471	1	102991	49523.3	13.7675	73	0		1	277196	129393	165789	63872	127250	13.7675
20.95	74830	119939	112813	51204	39606	70506	35808	49189	69236.9		10482	36174	111381	85860	109430	70665.4	20.95	61	0		107520	1	119250	172575	105394	1	84123.5	20.95	61	0		24997	79622	36246	38270	177355	1	59415.2	20.95	61	0		1	192686	20371	48586	43659	61060.6	20.95
21.2125	16646	311592	1	1	175493	44325	1	31886	72493.1		495	63095	1	94529	227641	77152.2	21.2125	233	0		193816	1	162858	57966	77509	1	82025.2	21.2125	233	0		1	35607	22087	91086	1	192712	56915.7	21.2125	233	0		1	6827	13406	64792	1	17005.4	21.2125
19.4208	33093	32437	1	1	224018	66250	58449	40329	56822.2		1	1	177680	113978	34404	65212.8	19.4208	149	0		115898	1	1	290558	1	77567	80671	19.4208	149	0		45460	58641	1	52944	1	1	26174.7	19.4208	149	0		1	440298	58854	424197	53402	195350	19.4208
22.445	40209	36140	213042	282960	238397	1	1	1	101344		1	295958	1	1	226901	104572	22.445	64	0		212905	1	1	1	298542	18584	88339	22.445	64	0		1	1	1	1	1	1799	300.667	22.445	64	0		114	1	230447	1	1	46112.8	22.445
22.3317	1	1	1	1	1	296353	1	1	37045		1	1	166729	170293	1	67405	22.3317	72	0		1	1	191299	1	1	1	31884	22.3317	72	0		166761	1	1	1	1	1	27794.3	22.3317	72	0		1	1	269185	342320	1	122302	22.3317
28.63	846373	107924	227116	7237	19928	7159	25482	139795	172627		1	24318	45090	6956	12338	17740.6	28.63	75	0		3123	7534	52301	1	32489	1	15908.2	28.63	75	0		172374	212315	505	77409	53041	12840	88080.7	28.63	75	0		1	31683	52021	78198	4365	33253.6	28.63
21.25	1	122152	177278	161887	119799	25559	197695	1	100546		1	31490	1	59825	99493	38162	21.25	99	0		81707	1	84455	1	1	85594	41959.8	21.25	99	0		160899	22813	11133	39627	198858	73109	84406.5	21.25	99	0		1	1	10246	33870	163903	41604.2	21.25
21.8308	1	31963	96439	111964	20276	38957	78576	67715	55736.4		33720	47100	108506	160501	68387	83642.8	21.8308	147	0		304060	648	130705	1	5636	212068	108853	21.8308	147	0		124248	76226	1	113026	125869	1	73228.5	21.8308	147	0		1	94452	1	1	1	18891.2	21.8308
8.81917	1	47195	54459	56613	54549	74983	97151	59430	55547.6		205410	101720	71875	60582	67208	101359	8.81917	63	0		77540	139676	70076	94014	101187	54803	89549.3	8.81917	63	34001.7		83532	1	13576	96211	74308	60431	54676.5	8.81917	63	0		272	93343	1	89058	77	36550.2	8.81917
21.3308	1	1	1	1	1	1	1	694776	86847.9		101916	1	1	1	1	20384	21.3308	74	0		1	1	1	1	1	490057	81677	21.3308	74	0		526465	1	1	1	620491	1	191160	21.3308	74	0		1	1	1	1	1	1	21.3308
19.4792	1	1	1	317456	1	1	1	216115	66697.1		1	1	1	187591	1	37519	19.4792	133	0		241625	1	1	1	513036	179055	155620	19.4792	133	0		1	324783	1	1	1	1	54131.3	19.4792	133	0		1	1	259094	1	1	51819.6	19.4792
14.7708	33213	41444	60711	77686	73345	99933	97846	59236	67926.8		94169	77858	52587	37089	50177	62376	14.7708	71	0		52751	19282	59518	79159	80443	1	48525.7	14.7708	71	0		43516	71983	87184	69451	75875	36081	64015	14.7708	71	0		5040	122598	81682	109523	103945	84557.6	14.7708
21.3083	59652	143308	163075	103106	115091	1	76520	89472	93778.1		756	26872	168316	104481	160013	92087.6	21.3083	143	0		54090	1	88066	25374	27552	1	32514	21.3083	143	-61264.1		148655	73243	1	42555	141117	96683	83709	21.3083	143	0		1	1	33854	16155	106933	31388.8	21.3083
14.0783	74705	1	113229	1	72661	150003	43347	1	56743.5		19276	125157	95716	1	100751	68180.2	14.0783	284	0		1	1	90796	113777	130122	1	55783	14.0783	284	0		1	127445	45527	119010	123453	1	69239.5	14.0783	284	0		1	105365	111047	1	160702	75423.2	14.0783
21.2708	94613	1	1	199843	239093	1	264555	1	99763.5		1	1	89254	115893	156773	72384.4	21.2708	61	0		138711	277	129690	1	75485	50833	65832.8	21.2708	61	0		1	49402	26617	68870	1	1	24148.7	21.2708	61	0		1	1	1	73005	257267	66055	21.2708
22.7725	208736	95391	58470	1	66902	115423	1036	137308	85408.4		80838	1	223280	1	79558	76735.6	22.7725	75	0		1	2957	207996	114627	1	12615	56366.2	22.7725	75	0		166338	1	1	1	1	1	27723.8	22.7725	75	0		1	1	1	1	163880	32776.8	22.7725
8.74833	1	26915	24399	79606	10404	39176	44553	64160	36151.8		78280	122392	71536	67845	57615	79533.6	8.74833	113	43381.9		261773	4037	67430	33809	94305	236112	116244	8.74833	113	0		104268	30348	2420	110871	39399	83319	61770.8	8.74833	113	0		16198	104444	24384	109863	21980	55373.8	8.74833
9.2325	1	1	47195	1	1	112251	97042	1	32061.6		1	51815	1	1	435093	97382.2	9.2325	74	0		1	3512	218762	1	28903	1	41863.3	9.2325	74	0		344222	1	1364	502407	20379	1	144729	9.2325	74	0		238599	1	166726	20582	51308	95443.2	9.2325
25.9842	72697	70706	90084	53302	16042	99610	75143	84212	70224.5		36307	108925	85635	62896	84649	75682.4	25.9842	207	0		9076	1258	71658	84954	14111	55721	39463	25.9842	207	0		79566	103155	129897	108444	72375	67052	93414.8	25.9842	207	0		1	4357	113948	24105	58219	40126	25.9842
10.415	1	1	1	280379	1	1	1	229575	63745		1	292424	199802	1	236107	145667	10.415	149	0		263303	21806	1	1	1	1	47518.8	10.415	149	0		1	282793	1	251153	1	1	88991.7	10.415	149	0		10220	1	298502	1	1	61745	10.415
22.5033	237305	241506	1	1	1	1	1	246240	90632		1	1	235643	237953	1	94719.8	22.5033	175	0		1	1	270328	1	1	206346	79446.3	22.5033	175	0		249002	1	12689	1	1	229663	81892.8	22.5033	175	0		2060	1	1	1	1	412.8	22.5033
10.9217	15396	1	1	1	1	92365	1	91045	24851.4		38792	1	1	53799	62138	30946.2	10.9217	147	0		97017	273424	1	71331	1	21693	77244.5	10.9217	147	0		1	1	54961	82525	1	1068107	200933	10.9217	147	0		1	155410	1	132186	1	57519.8	10.9217
10.4292	1	1	169962	204603	1	1	255932	171387	100236		1	212123	1	1	1	42425.4	10.4292	131	0		171691	31349	1	208352	203811	1	102534	10.4292	131	0		1	212404	1	1	1	1	35401.5	10.4292	131	0		5405	1	227032	1	1	46488	10.4292
12.835	112966	69886	62525	73891	70217	88441	120129	94045	86512.5		38938	55132	51607	74829	80615	60224.2	12.835	156	-26288.3		55441	5588	87408	51255	59412	107413	61086.2	12.835	156	0		73501	56084	59850	54022	71652	71275	64397.3	12.835	156	64397.3		637	59308	64500	84339	52719	52300.6	12.835
12.64	181742	250610	1	1	40138	1	1	277516	93751.2		49419	1	221088	210171	254079	146952	12.64	72	0		1	21737	213366	1	1	187221	70387.8	12.64	72	0		233805	1	41943	1	1	1	45958.7	12.64	72	0		12417	1	1	1	1	2484.2	12.64
22.3675	1	91798	99870	128062	118257	140527	148594	1	90888.8		1	125382	1	86252	99009	62129	22.3675	226	0		100565	1	99528	1	122219	1	53719.2	22.3675	226	0		95162	1	1	1	119199	82587	49491.8	22.3675	226	0		1	1	130395	167276	167104	92955.4	22.3675
8.05583	777	76062	100032	1	102310	1	87564	106084	59103.9		274673	115335	105337	103836	1	119836	8.05583	102	0		1	1	122243	151079	138160	59013	78416.2	8.05583	102	0		101998	106	1	115853	1	108300	54376.5	8.05583	102	0		1	400	1420	130771	1407	26799.8	8.05583
22.8425	516820	1	1	1	59940	124235	32005	116070	106134		36145	41503	1	1	1	15530.2	22.8425	75	0		1	2207	1	148750	6789	1	26291.5	22.8425	75	0		1	12888	97231	1	1	1	18353.8	22.8425	75	0		1	139103	1	124007	148637	82349.8	22.8425
14.1675	1	299932	1	1	1	1	151174	1	56389		154007	1	1	1	1	30802.2	14.1675	135	0		1	1558	1	1	446026	1	74598	14.1675	135	0		1	1	199782	1	1	1	33297.8	14.1675	135	0		1	1	1	137532	1	27507.2	14.1675
21.9317	1	1	1	1	1	73424	1	176236	31208.2		22139	1	1	1	1	4428.6	21.9317	75	0		585068	4534	308508	63703	1	1	160302	21.9317	75	0		249615	153689	63211	1	169563	1	106013	21.9317	75	0		6692	29335	393438	1	1	85893.4	21.9317
18.3517	128405	1	82429	121367	52613	72911	117516	126146	87673.5		36038	76872	1	125333	116409	70930.6	18.3517	60	0		114532	3324	1	71314	1	88765	46322.8	18.3517	60	0		1	135639	42085	93566	85848	1	59523.3	18.3517	60	0		7431	88370	101216	56401	122827	75249	18.3517
8.1225	1	101407	99368	558	97991	1	82817	107300	61180.4		249824	109779	101745	107080	1	113686	8.1225	116	0		1	1	123418	153966	140987	70094	81411.2	8.1225	116	0		101233	2185	1713	109107	1	108704	53823.8	8.1225	116	0		1	1	4669	120587	4323	25916.2	8.1225
20.6892	274851	1	78634	129251	334904	1	1	47955	108200		1	1	227862	209897	1	87552.4	20.6892	73	0		1	1	1	353576	1	171869	87574.8	20.6892	73	0		1	55972	1	59465	37719	187213	56728.5	20.6892	73	0		34694	1	1	1	1	6939.6	20.6892
27.2483	247138	29707	282231	16451	35905	29297	32132	128348	100151		14159	57361	78186	154827	51842	71275	27.2483	73	0		11871	5603	46123	78919	33958	102725	46533.2	27.2483	73	0		80129	62981	174892	120754	33010	76954	91453.3	27.2483	73	0		1	21394	83230	60408	1	33006.8	27.2483
8.66333	1	1	1	87496	1	1	1	14410	12739		1	59425	1	1	14279	14741.4	8.66333	75	0		177847	14253	15459	1	1	1	34593.7	8.66333	75	0		16317	523176	1	1	15487	1	92497.2	8.66333	75	0		311849	98005	443655	1	439700	258642	8.66333
22.2017	1	1	1	149493	1	220715	200395	125284	86986.4		1	1	1	1	140510	28102.8	22.2017	70	0		115347	1	1	1	1	47108	27076.5	22.2017	70	0		110698	1	1	1	1	1	18450.5	22.2017	70	0		23072	272883	1	1	228443	104880	22.2017
14.1367	1	380457	1	1	1	1	146563	1	65878.2		147852	1	1	331779	1	95926.8	14.1367	207	0		431012	81	1	1	1	1	71849.5	14.1367	207	0		1	1	233291	1	1	1	38882.7	14.1367	207	0		1	1	1	147357	1	29472.2	14.1367
19.4325	79073	93546	86432	141594	111698	1	75749	93264	85169.6		1	119949	78666	43120	94498	67246.8	19.4325	231	0		125152	1	143253	92676	1	1	60180.7	19.4325	231	0		81464	149494	59932	99441	72202	1	77089	19.4325	231	0		1	79267	108717	96023	64427	69687	19.4325
9.61333	49743	41156	29573	39350	35921	36695	24367	44179	37623		81309	65356	39853	45277	70904	60539.8	9.61333	75	22916.8		119341	547698	56580	1	1	115216	139806	9.61333	75	0		83497	67451	275835	1	34532	1	76886.2	9.61333	75	0		1	53698	66564	49267	45246	42955.2	9.61333
14.0292	35517	70846	76118	96401	1	131990	75156	70524	69569.1		32375	96190	65509	59191	61230	62899	14.0292	87	0		67789	77572	76853	99567	95712	46019	77252	14.0292	87	0		74843	1	75134	76062	91969	1	53001.7	14.0292	87	0		40544	138755	1	11030	128042	63674.4	14.0292
15.4183	12855	132866	1	181161	1	89923	144887	158981	90084.4		1	151265	98738	1	99075	69816	15.4183	73	0		70748	25343	79907	43280	41555	1	43472.3	15.4183	73	0		1	1	139364	146433	6958	183308	79344.2	15.4183	73	0		5615	1	1	1	133349	27793.4	15.4183
14.0175	35110	43567	50502	78204	63267	104895	93938	60276	66219.9		79073	83087	55896	74028	54816	69380	14.0175	79	0		62825	1	72731	70209	80815	53895	56746	14.0175	79	0		98130	66091	123072	61383	81629	28226	76421.8	14.0175	79	0		33638	127042	59140	10909	98756	65897	14.0175
22.7692	293198	1	1	1	102656	105835	43413	150256	86920.1		36339	1	220555	1	1	51379.4	22.7692	147	0		1	1631	246255	78739	1	122190	74802.8	22.7692	147	0		1	1	1	1	1	1	1	22.7692	147	0		10815	122273	6627	126071	111289	75415	22.7692
26.3167	1	49218	1	62137	74521	115917	100854	71832	59310.1		67992	94094	1	57421	74119	58725.4	26.3167	162	0		8609	2603	67637	86720	60521	47323	45568.8	26.3167	162	0		67003	96667	90179	83068	64522	51139	75429.7	26.3167	162	0		1	8968	99434	139534	59104	61408.2	26.3167
8.23833	84358	112542	82917	1	87690	70401	6967	92649	67190.6		256293	73505	69174	128081	59001	117211	8.23833	77	0		57180	25751	108843	128401	138810	1	76497.7	8.23833	77	0		105418	3009	1	1	95261	95686	49896	8.23833	77	0		23228	1	1	142706	9695	35126.2	8.23833
12.8242	76882	72023	65031	74735	94792	103685	108504	59579	81903.9		54852	60736	50207	74959	86671	65485	12.8242	61	0		54881	1	83440	66734	58254	78527	56972.8	12.8242	61	0		62032	51228	89561	44200	79058	77893	67328.7	12.8242	61	0		1	42242	43342	105766	60349	50340	12.8242
24.3667	152665	101443	59191	80131	1287	21571	49142	135358	75098.5		6002	67270	97039	125778	129996	85217	24.3667	205	0		98659	900	70558	54625	118026	71595	69060.5	24.3667	205	0		126836	123014	2189	73318	47807	63571	72789.2	24.3667	205	0		2871	46842	123611	18314	75026	53332.8	24.3667
26.9225	1	88983	121448	38107	186707	28917	1	1	58020.6		35745	1	1	182939	109179	65573	26.9225	73	0		8530	1	1	22279	4456	1	5878	26.9225	73	0		230158	98740	1	274258	8919	136070	124691	26.9225	73	0		295294	1	1	81661	20688	79529	26.9225
9	46700	61759	49000	49197	57137	47033	58504	70672	55000.2		98187	99627	106987	92734	87512	97009.4	9	154	42009.1		143458	91064	77680	96587	113762	51880	95738.5	9	154	40738.2		105910	568	486	92900	52631	103684	59363.2	9	154	0		1	88552	1	69416	750	31744	9
12.69	1	1	62283	82191	2289	95209	104914	1	43361.1		149857	80642	52277	1	52492	67053.8	12.69	135	0		58232	159007	1	84283	83415	38625	70593.8	12.69	135	0		1	86430	11515	70665	74379	1	40498.5	12.69	135	0		3615	132163	91682	84254	109624	84267.6	12.69
17.8125	1	1	133073	1	1	97407	69135	1	37452.5		1	241282	431180	202575	1	175008	17.8125	73	0		1	1	1	208707	1	1	34785.3	17.8125	73	0		1	233820	25813	1	194884	1	75753.3	17.8125	73	0		23705	204884	214425	1	1	88603.2	17.8125
21.2808	1	173734	244133	212768	144893	1	1	82482	107252		1205	1	206635	95745	170086	94734.4	21.2808	144	0		1	1	108099	1	1	189482	49597.5	21.2808	144	0		1	67062	2985	1	260345	1	55065.8	21.2808	144	0		1	1	29483	1	1	5897.4	21.2808
26.5492	75956	30203	110970	32937	49029	66309	59163	109329	66737		36724	113425	86012	87437	85800	81879.6	26.5492	72	0		5689	1384	56640	50815	32027	68041	35766	26.5492	72	0		52524	118642	124298	116345	33210	50920	82656.5	26.5492	72	0		36200	5841	104019	151805	32428	66058.6	26.5492
18.345	1	94777	69488	1	59356	92245	165106	98732	72463.2		25105	58705	58628	1	99985	48484.8	18.345	149	0		1	8451	91431	46645	67160	243334	76170.3	18.345	149	0		82039	134884	68131	64814	53804	1	67278.8	18.345	149	0		18489	92638	87533	45550	89284	66698.8	18.345
19.2658	1	1	152720	98957	1	1	71133	116447	54907.6		92631	1	155021	188854	1	87301.6	19.2658	86	0		151780	1	1	173583	143748	1	78185.7	19.2658	86	0		110388	173727	27071	106016	1	1	69534	19.2658	86	0		3447	1	101790	69293	106161	56138.4	19.2658
10.6692	1	1	210639	1	1	1	1	186709	49669.2		676606	1	1	1	1	135322	10.6692	79	0		1	1	1	1	1	1	1	10.6692	79	0		1	1	110791	1	1	1207	18667	10.6692	79	0		1	211252	77396	1	1	57730.2	10.6692
21.26	1	116906	162046	149085	162850	1	172767	1	95457.1		1	1	122505	1	1	24501.8	21.26	132	0		93628	1	114246	1	1	105654	52255.2	21.26	132	0		155038	1	10285	47764	178866	76521	78079.2	21.26	132	0		1	10245	1	38084	153068	40279.8	21.26
38.0342	211016	2454	211746	1476	12981	125521	16271	45299	78345.5		1166	69196	418821	373453	40080	180543	38.0342	75	0		921	3824	10019	1	52818	77802	24230.8	38.0342	75	0		88925	122944	82654	88470	1	201	63865.8	38.0342	75	0		773	1899	15356	174218	3114	39072	38.0342
18.6083	1	188695	1	1	1	76622	101949	1	45908.9		1	123802	1	1	1	24761.2	18.6083	147	0		218935	1	335694	92199	1	495054	190314	18.6083	147	0		1	54232	74647	139703	77132	221762	94579.5	18.6083	147	0		1	1	1	1	1	1	18.6083
18.6192	183159	1	111785	1	80489	71332	1	204798	81445.8		1	158022	1	1	192936	70192.2	18.6192	100	0		274575	1	1	1	227281	1	83643.3	18.6192	100	0		1	119367	1	1	1	170549	48320	18.6192	100	0		1	1	1	207077	122434	65902.8	18.6192
14.0242	59498	79602	69116	75800	95893	103238	78064	79212	80052.9		38600	83404	60762	72503	69422	64938.2	14.0242	116	0		59291	99734	92314	71310	74743	91849	81540.2	14.0242	116	0		69207	1	1	70480	77190	42330	43201.5	14.0242	116	43201.5		50463	1	69336	35225	94412	49887.4	14.0242
22.38	1	1	87625	112637	1	152618	1	1	44110.6		1	1	88189	70603	84836	48726	22.38	115	0		1	1	103661	132508	114271	51812	67042.3	22.38	115	0		83003	122859	135913	1	120408	63497	87613.5	22.38	115	0		1	195717	1	1	1	39144.2	22.38
8.79	26475	58758	61636	64171	51998	79087	82424	66268	61352.1		193108	94410	59004	63760	68001	95656.6	8.79	61	0		68326	96965	75948	93267	92421	1	71154.7	8.79	61	0		75892	1	31633	89907	75585	54047	54510.8	8.79	61	0		3616	1	1	90631	23888	23627.4	8.79
18.7075	33274	1	113476	1	93776	170181	1	1	51338.9		170632	149248	1	76425	1	79261.4	18.7075	60	0		100758	1	113261	1	162491	57868	72396.7	18.7075	60	0		121081	1	1	1	147814	1	44816.5	18.7075	60	0		1326	209577	1	1	1	42181.2	18.7075
14.1142	29915	1	65971	68120	94431	110458	91915	1	57601.5		120728	107329	52648	1	1	56141.4	14.1142	60	0		27335	1	51758	105269	1	18128	33748.7	14.1142	60	0		21218	82223	139874	30669	99913	1	62316.3	14.1142	60	0		1	122261	94764	145772	113840	95327.6	14.1142
14.1208	61961	1	112522	1	75513	278910	86343	1	76906.5		114111	199626	95036	1	100556	101866	14.1208	77	0		1	1	1	1	1	1	1	14.1208	77	0		1	190606	65898	1	171705	1	71368.7	14.1208	77	0		1	1	89618	59355	1	29795.2	14.1208
13.2425	23712	23387	33353	64077	37280	30617	27683	22411	32815		94030	36285	8221	34585	55087	45641.6	13.2425	131	0		50929	363626	19182	44054	46959	30305	92509.2	13.2425	131	0		21110	50819	32690	31648	33848	13113	30538	13.2425	131	0		226992	111382	88191	42430	90880	111975	13.2425
22.4033	1	1	101301	130791	114278	1	141914	1	61036		1	122316	1	83825	101622	61553	22.4033	329	0		101059	1	1	114658	122556	81671	69991	22.4033	329	0		1	1	1	116991	121952	1	39824.5	22.4033	329	0		1	1	124595	155771	159335	87940.6	22.4033
17.5183	1	72950	86254	101699	1	119948	106384	78610	70730.9		95097	86032	1	1	55588	47343.8	17.5183	135	0		67873	22485	83863	109979	42789	1	54498.3	17.5183	135	0		1	103503	74041	706	106348	52491	56181.7	17.5183	135	0		1	1	85748	1	133553	43860.8	17.5183
11.8233	88885	71443	74670	100261	217922	69766	54280	39348	89571.9		44078	56758	24041	70090	40199	47033.2	11.8233	75	0		76063	167976	129538	1	1	273542	107854	11.8233	75	0		91494	1	18633	1	55900	1	27671.7	11.8233	75	27671.7		1	48301	77986	79944	40532	49352.8	11.8233
36.1058	169817	338108	99343	1	1	1	252	123684	91400.9		385	1	167135	672169	1	167938	36.1058	74	0		1	864	48613	384	1	24520	12397.2	36.1058	74	0		347342	1	1	198861	75301	25	103588	36.1058	74	0		1	1	1	522	1	105.2	36.1058
14.1275	1	1	336317	1	1	1	144264	1	60073.4		162333	1	1	1	1	32467.4	14.1275	191	0		1	1	1	1	399505	217825	102889	14.1275	191	0		258704	1	210622	1	1	219519	114808	14.1275	191	0		1	1	1	155514	1	31103.6	14.1275
8.78083	1	34580	39418	45886	48561	95552	100569	45064	51203.9		198860	84151	51100	52610	52671	87878.4	8.78083	66	0		42427	156248	46957	69490	60453	44749	70054	8.78083	66	0		66672	1	120442	73642	61299	55262	62886.3	8.78083	66	0		1	1	1	87929	23369	22260.2	8.78083
17.5167	1	71179	84076	101573	82788	123417	109299	79587	81490		95738	1	1	1	62930	31734.2	17.5167	119	0		75926	22025	1	109031	1	40364	41224.7	17.5167	119	0		1	99718	76430	1	102817	53368	55389.2	17.5167	119	0		205	1	87639	1	136773	44923.8	17.5167
19.1275	395926	80394	1	1	76712	3061	50077	1	75771.6		53461	1	97755	1	1	30243.8	19.1275	75	0		128691	14230	72102	83480	172784	1	78548	19.1275	75	0		84096	11066	18967	1	1	1	19022	19.1275	75	0		371671	1	1	165509	67301	120897	19.1275
11.7292	120050	1	1	158433	67078	1	1	1	43195.8		138144	1	111979	160159	138739	109804	11.7292	66	0		1	1	133185	207689	1	1	56813	11.7292	66	0		130014	1	61816	1	1	1	31972.3	11.7292	66	0		2410	232545	183220	40092	1	91653.6	11.7292
10.6742	1	144726	149266	3568	5496	1	202725	158458	83030.1		1	1	144835	153335	157135	91061.4	10.6742	61	0		145592	1	165403	1	1	1	51833.2	10.6742	61	0		1	1	104092	1	171264	255660	88503.2	10.6742	61	0		218	1	3156	1	1	675.4	10.6742
27.0875	63494	1	744511	1954	1	437087	1	43807	161357		3642	11154	1	6651	35705	11430.6	27.0875	73	0		9615	1	9159	6443	480451	28570	89039.8	27.0875	73	0		17935	29227	1	69822	8962	48368	29052.5	27.0875	73	0		8278	3030	27035	41399	13402	18628.8	27.0875
18.7883	90048	98456	113227	129737	793	1	169353	86459	86009.2		1204	1	64060	61392	104004	46132.2	18.7883	192	0		103496	1	1	39818	122179	71646	56190.2	18.7883	192	0		97550	1	122713	113948	1	90687	70816.7	18.7883	192	0		1	1	149023	1	165413	62887.8	18.7883
22.4517	1	3053	79864	20861	116560	61530	71566	18822	46532.1		86492	56535	38522	898	35359	43561.2	22.4517	217	0		53769	8022	37661	99065	36304	1	39137	22.4517	217	0		35628	119866	291811	36043	46154	2487	88664.8	22.4517	217	0		1908	73221	116582	246490	86904	105021	22.4517
24.9108	1	1	1	118753	1	228936	71159	1	52356.6		855	190274	1	1	1	38226.4	24.9108	143	0		1	86	1	1	171449	408072	96601.7	24.9108	143	0		1	1	1	412362	1	1	68727.8	24.9108	143	0		1	1	1	18576	57536	15223	24.9108
18.6558	46075	67246	113597	50308	94333	169625	1	1	67648.2		193992	133513	46845	58805	103158	107263	18.6558	66	0		87562	681	121435	1	135434	28638	62291.8	18.6558	66	0		105866	10583	1	22883	134162	54296	54631.8	18.6558	66	0		255	211001	14225	1	1	45096.6	18.6558
10.3092	1	99947	150908	1	1	1	1	1	31357.6		1	168487	123473	81072	34886	81583.8	10.3092	79	0		1	1	1	206102	92788	1	49815.7	10.3092	79	0		136152	1	1	119296	159864	98713	85671.2	10.3092	79	0		1	1	1	1	1	1	10.3092
11.5383	27319	5308	37536	13731	57029	59623	107904	21783	41279.1		296236	118506	46695	14966	15639	98408.4	11.5383	77	0		1	236925	64176	27862	99929	5407	72383.3	11.5383	77	0		52276	69394	1	73202	72264	1	44523	11.5383	77	0		129823	43177	27324	141716	74115	83231	11.5383
18.295	1	1	1	464004	1	1	1	1	58001.4		69075	1	1	1	1	13815.8	18.295	74	0		452686	1	1	1	1	399474	142027	18.295	74	0		1	1	1	313200	1	1	52200.8	18.295	74	0		1	1	1	1	298986	59798	18.295
18.2867	1	310465	134286	1	1	1	1	1	55594.6		27894	1	1	249055	1	55390.4	18.2867	61	0		311641	1947	1	101636	1	1	69204.5	18.2867	61	0		1	95294	41794	1	1	270108	67866.5	18.2867	61	0		1	1	1	1	157504	31501.6	18.2867
26.4308	32762	1	1	1	1	1	1	30728	7937		1	1	47282	1	630008	135459	26.4308	74	0		3533	853	1	1	1	24764	4858.83	26.4308	74	0		1	1	64818	1	1	1	10803.8	26.4308	74	0		1	4505	20967	1377546	1	280604	26.4308
18.7258	84630	99545	1	1	76050	198596	1	1	57353.1		126864	149146	1	1	116516	78505.6	18.7258	135	0		1	1	71387	1	1	1	11898.7	18.7258	135	0		118515	122640	1	1	150725	85202	79514	18.7258	135	0		2199	199508	1	141003	1	68542.4	18.7258
21.4167	1	56881	76480	118206	69072	157824	94778	82947	82023.6		666	85573	61184	49864	1	39457.6	21.4167	98	0		82399	184	65317	96214	74270	1	53064.2	21.4167	98	0		55623	89069	114383	54352	84248	1	66279.3	21.4167	98	0		1	86823	83874	57228	78536	61292.4	21.4167
22.3367	83863	84397	1	124201	1	1	1	92617	48135.2		1	119148	84318	1	95547	59803	22.3367	226	0		98059	1	1	128499	118147	1	57451.3	22.3367	226	0		1	126011	150567	1	114559	79441	78430	22.3367	226	0		1	195420	1	167597	1	72604	22.3367
21.2408	4045	96910	182382	130057	60370	11418	155286	8370	81104.8		1	17121	177175	28956	67926	58235.8	21.2408	306	0		54947	1	48888	15740	21248	116447	42878.5	21.2408	306	0		153902	8997	5130	24630	187913	56729	72883.5	21.2408	306	0		1	336	2822	17264	120943	28273.2	21.2408
18.75	116309	123566	1	1	83767	1	1	1	40455.9		156924	163704	1	1	136291	91384.2	18.75	143	0		1	1	82207	1	1	1	13702	18.75	143	0		1	137002	1	1	171315	112291	70101.8	18.75	143	0		520	217174	1	154782	1	74495.6	18.75
11.165	92178	17556	65682	1	1	94704	1	48825	39868.5		323479	40018	65098	37680	1	93255.2	11.165	79	0		53023	178863	1	26333	49873	96748	67473.5	11.165	79	0		102582	1	31434	16559	3715	40366	32442.8	11.165	79	0		255734	95085	1	16138	173243	108040	11.165
26.0358	1	1	1	1	1	1	1	1	1		1	1	1	464833	678763	228720	26.0358	117	0		1	1	1	1	1	1	1	26.0358	117	#DIV/0!		1	1	88078	36381	1	455869	96721.8	26.0358	117	0		1	1	1	1	1	1	26.0358
10.8467	1	45970	1	131290	136314	1	1	212348	65740.8		1	1	34852	211871	92779	67900.8	10.8467	73	0		208093	1	1	1	1	1	34683	10.8467	73	0		1	115574	466489	1	1	1	97011.2	10.8467	73	0		1	212907	33359	97643	70381	82858.2	10.8467
21.0283	1	1	1	1	9159	1	15308	1	3059.12		1	1	1	1	1	1	21.0283	188	0		1	1	1	1	1	2190265	365045	21.0283	188	0		1	1	1	1	1	1	1	21.0283	188	0		1	1	1	1	1	1	21.0283
22.2983	65341	48939	1	99047	1	124371	1	73896	51449.6		1	104432	73521	47317	1	45054.4	22.2983	70	0		57055	820	79792	1	101174	1	39807.2	22.2983	70	0		57240	109177	125324	98584	1	1	65054.5	22.2983	70	0		31580	186496	159442	158069	143079	135733	22.2983
19.2617	1	1	137015	89251	1	1	71538	110437	51030.6		101010	1	201497	218179	1	104138	19.2617	100	0		178542	490	1	310743	1	1	81629.7	19.2617	100	0		1	151539	45665	97724	1	1	49155.2	19.2617	100	0		247	1	99064	1	100350	39932.6	19.2617
12.7217	1	24481	57574	37693	1	86220	124983	29655	45076		170218	45843	39425	65898	38925	72061.8	12.7217	79	0		35310	214235	51601	55301	56986	64828	79710.2	12.7217	79	0		68286	75854	23249	15675	44432	34414	43651.7	12.7217	79	0		4434	80749	1	74742	122002	56385.6	12.7217
22.2342	41891	77592	91766	1	60702	1	1	1	33994.4		351511	1	43844	1	50259	89123.2	22.2342	85	0		1	1	49912	111077	113491	1	45747.2	22.2342	85	0		1	102291	125139	1	1	1	37905.7	22.2342	85	0		125654	1	112395	162653	1	80140.8	22.2342
21.275	1	100820	166574	129123	82424	16480	151810	1	80904.1		1121	21009	136763	42037	77867	55759.4	21.275	172	0		60772	1	60428	20826	27800	100473	45050	21.275	172	0		143751	15475	6587	27080	176272	63113	72046.3	21.275	172	0		1	7610	6471	21094	124336	31902.4	21.275
18.7592	1	1	1	138692	1	175787	146258	115566	72038.4		1	135295	86256	1	1	44310.8	18.7592	66	0		1	58946	1	96675	1	1	25937.5	18.7592	66	0		1	112333	139003	100878	117523	1	78289.8	18.7592	66	0		1	1	112854	175670	171673	92039.8	18.7592
8.05667	2895	86235	91447	1	91603	1	78197	98369	56093.5		239505	102884	90985	94549	1	105585	8.05667	101	0		1	1	112178	132381	124396	56204	70860.2	8.05667	101	0		91817	7174	1	104074	1	95634	49783.5	8.05667	101	0		1	483	12052	115657	13439	28326.4	8.05667
8.1725	81345	106018	68843	1	47223	1	61407	96789	57703.4		212404	70233	60688	199055	145302	137536	8.1725	147	79833		1	1560	55110	1	74710	1	21897.2	8.1725	147	0		118030	1	1850	1	98535	1	36403	8.1725	147	0		1	1	1	1	1	1	8.1725
21.3667	1	1	68351	109784	30530	144742	112087	85721	68902.1		9982	104803	57678	1	1	34493	21.3667	77	0		82835	1	1	108176	91492	1	47084.3	21.3667	77	0		64549	96341	120396	62759	76618	10597	71876.7	21.3667	77	0		1	107732	98283	70511	96449	74595.2	21.3667
10.3808	1	1	1	90907	91964	154193	1	1	42133.6		297826	97162	1	1	1	78998.2	10.3808	87	0		70195	1	78727	96046	94418	1	56564.7	10.3808	87	0		1	103827	4036	72234	88406	1	44750.8	10.3808	87	0		1	151636	97286	135253	122709	101377	10.3808
22.2375	1	1	1	1	1	1	1	1	1		536586	1	1	1	1	107318	22.2375	61	0		1	1	74630	153340	1	1	37995.7	22.2375	61	0		1	145953	178466	1	1	1	54070.5	22.2375	61	0		1286	208645	158078	1	1	73602.2	22.2375
10.4958	123797	94389	1	1	170009	161401	1	1	68700		1	1	133937	95868	44512	54863.8	10.4958	79	0		135401	224488	75989	1	1	130236	94352.7	10.4958	79	0		154307	1	215476	163065	1	1	88808.5	10.4958	79	0		12901	152706	1	1	1	33122	10.4958
19.3792	44338	42912	45284	1	1	1	1	1	16567.4		45866	234554	1	74650	44658	79945.8	19.3792	149	0		1	1	79502	1	305390	1	64149.3	19.3792	149	0		46092	1	162905	1	272881	63714	90932.3	19.3792	149	0		1	536159	1	1	1	107233	19.3792
14.0742	50455	61601	67399	85176	62115	92946	54082	66601	67546.9		21462	75951	57759	57989	66196	55871.4	14.0742	316	0		69744	1	61115	74332	81117	48486	55799.2	14.0742	316	0		66510	79176	54168	76903	75844	1	58767	14.0742	316	0		256	99916	76276	1525	101790	55952.6	14.0742
25.0775	9	1	1	1	2173194	211	171	678	271783		504	1	120	1	1	125.4	25.0775	273	0		1	1	1	1	251	1	42.6667	25.0775	273	0		231	1	1046	237	155	1	278.5	25.0775	273	0		1	1	247	1	27	55.4	25.0775
18.5242	1	1	1	1	86767	74266	126940	1	35997.2		76931	137559	1	93276	165056	94564.6	18.5242	75	0		197238	60842	1	1	168972	1	71175.8	18.5242	75	0		1	112753	29353	1	156138	1	49707.8	18.5242	75	0		86195	88659	1	1	217295	78430.2	18.5242
22.9233	260087	171697	82573	72000	23912	90058	17685	112274	103786		1	36006	1	170662	82671	57868.2	22.9233	147	0		24815	3977	1	66911	1	81994	29616.5	22.9233	147	0		156458	21202	87473	1	65958	159549	81773.5	22.9233	147	0		29894	1	10888	81979	1	24552.6	22.9233
14.8058	26015	1	83616	1	46591	1	99327	75510	41382.8		140531	69074	1	56305	56219	64426	14.8058	66	0		1	26355	1	79622	107369	1	35558.2	14.8058	66	0		46886	76372	91722	51724	77905	46552	65193.5	14.8058	66	0		1	102102	59394	105226	89252	71195	14.8058
26.4317	29357	1	1	1	9371	1	1	1	4841.75		1	887191	50470	1	1	187533	26.4317	117	0		1	225	1	1	1	31056	5214.17	26.4317	117	0		1	1	61546	1	8102	1	11608.7	26.4317	117	0		1	2377	14552	1	1	3386.4	26.4317
9.79833	15284	213581	49345	85151	12357	49672	217379	43097	85733.2		25949	32905	33060	114314	76366	56518.8	9.79833	165	0		94698	2149	16167	13506	23514	253556	67265	9.79833	165	0		30336	57035	1	32065	29674	36746	30976.2	9.79833	165	0		450	130926	50865	16772	75782	54959	9.79833
31.1942	160308	32233	53591	28831	24147	55595	75233	35955	58236.6		2948	23426	52416	45136	35378	31860.8	31.1942	73	0		33802	127022	33160	1	22326	121752	56343.8	31.1942	73	0		30317	184337	97986	51254	12866	6604	63894	31.1942	73	0		377279	83173	65255	27541	73230	125296	31.1942
8.72833	71707	115846	120200	1	1	1	22226	123060	56630.2		1	119188	132366	112125	27075	78151	8.72833	79	0		1	1	88366	183352	81407	124004	79521.8	8.72833	79	0		123863	1	1	1	120896	154757	66586.5	8.72833	79	0		1	117333	1	68296	1	37126.4	8.72833
20.8958	752091	1	1	1	1	1	1	1	94012.2		44908	19049	1	1	1	12792	20.8958	75	0		7590	5040	1	118866	1	347626	79854	20.8958	75	0		20519	19781	50386	1	1	563069	108960	20.8958	75	0		2750	77976	1	1	55932	27332	20.8958
26.5458	410937	1	1	1	1	1	1	1	51368		1	1	1	1	1	1	26.5458	75	0		1	1	1	1	1	357524	59588.2	26.5458	75	0		1	1	663360	676842	1	1	223368	26.5458	75	0		1	305	1	1	1	61.8	26.5458
14.3358	3881	1	23067	36264	152406	93743	38939	1	43537.8		13593	89318	28306	25397	89790	49280.8	14.3358	131	0		1	276616	135155	71021	147455	37879	111354	14.3358	131	0		65553	78567	29502	100915	107776	1	63719	14.3358	131	0		36323	97623	92905	3567	80793	62242.2	14.3358
9.815	1	101825	1	85288	30244	1	108791	99633	53223		1	115927	111065	84801	21941	66747	9.815	79	0		114291	1	1	146957	55646	110849	71290.8	9.815	79	0		103790	1	1	1	1	112771	36094.2	9.815	79	0		1	55622	25334	92315	95635	53781.4	9.815
22.43	1	221081	1	311769	1	1	1	240364	96652.4		1	1	225338	1	238247	92717.6	22.43	149	0		241280	1	1	1	298827	1	90018.5	22.43	149	0		1	1	72178	281888	1	1	59011.7	22.43	149	0		1257	1	1	1	1	252.2	22.43
21.8225	1	41151	1	1	1	43217	1	90091	21808		21340	48683	112926	137922	95209	83216	21.8225	75	61408		373591	1	76347	1	1	170055	103333	21.8225	75	0		1	130380	19004	1	77830	1	37869.5	21.8225	75	0		2690	102424	136354	43690	149498	86931.2	21.8225
14.0583	1	72461	85244	114630	1	121247	1	79235	59102.5		1	1	1	74090	82791	31376.8	14.0583	205	0		88486	762967	1	1	1	1	141910	14.0583	205	0		80184	1	1	1	1	1	13364.8	14.0583	205	0		387665	1	1	1	1	77533.8	14.0583
18.0308	182883	201522	1	202655	1	1	1	126968	89254		19611	1	143681	187724	1	70203.6	18.0308	60	0		251306	1	1	1	158151	127330	89465	18.0308	60	0		1	1	1	126599	1	1	21100.7	18.0308	60	0		1	1	1	1	110407	22082.2	18.0308
24.9383	99133	1	148159	30908	195331	56758	18601	135284	85521.9		1238	52939	112236	91199	1	51522.6	24.9383	117	0		60503	1	1	169503	48404	81534	59991	24.9383	117	0		116209	87706	71046	115737	145811	1	89418.3	24.9383	117	0		1	1	37289	7576	14379	11849.2	24.9383
19.4758	1	78699	18713	65329	390721	35229	8931	40966	79823.6		1034	1	1	194726	1	39152.6	19.4758	188	0		1	1	1	1	445072	175797	103479	19.4758	188	0		75480	40610	1	59221	1	1	29219	19.4758	188	0		1	1	41718	1	11763	10696.8	19.4758
17.4367	1	1	1	1	358633	1	1	1	44830		1	262723	1	1	1	52545.4	17.4367	176	0		1	1	1	1	115785	198142	52321.8	17.4367	176	0		200343	1	1	170848	1	246746	102990	17.4367	176	0		1	138794	1	184965	1	64752.4	17.4367
22.3483	139080	1	1	1	1	1	1	1	17385.9		1	1	1	1	156509	31302.6	22.3483	189	0		1	1	1	205633	188348	1	65664.2	22.3483	189	0		1	200301	1	1	1	1	33384.3	22.3483	189	0		1	308624	1	268754	1	115476	22.3483
26.2975	57555	42399	1	54026	62823	100095	86227	67764	58861.2		56692	86452	58334	54441	66500	64483.8	26.2975	221	0		7968	392	60332	75374	51970	45175	40201.8	26.2975	221	0		58747	88606	86187	1	55657	46640	55973	26.2975	221	0		1	8317	89871	127325	51578	55418.4	26.2975
8.91917	32960	72352	53276	60825	68387	75138	27376	78490	58600.5		1	114911	113820	104483	98358	86314.6	8.91917	66	0		145093	71809	80656	111012	106881	51483	94489	8.91917	66	35888.5		24370	1	1	1	1	111437	22635.2	8.91917	66	0		45305	1	1	88123	26418	31969.6	8.91917
9.355	10333	1	18898	42334	21338	23391	17859	10756	18113.8		64387	19741	1	17622	47924	29935	9.355	117	0		42737	303383	19335	21241	23942	37567	74700.8	9.355	117	0		1	459575	1	1	19646	11745	81828.2	9.355	117	0		490263	69559	51282	34224	1	129066	9.355
17.4308	112890	119070	1	1	149717	1	1	1	47710.2		1	150449	112368	108478	128694	99998	17.4308	116	0		1	1	122511	1	78763	71018	45382.5	17.4308	116	0		120860	177916	1	85572	146411	115832	107765	17.4308	116	0		1	102241	1	113526	1	43154	17.4308
18.7833	49360	58584	70934	84007	35148	101466	104912	58798	70401.1		53701	75157	43833	41926	1	42923.6	18.7833	150	0		63989	13336	1	31757	80398	45590	39178.5	18.7833	150	0		62751	60642	84003	72222	77622	52456	68282.7	18.7833	150	0		1	98574	91981	65549	109760	73173	18.7833
8.94083	1	30326	1	30649	24120	28940	1	38186	19028		1	47569	35060	44047	33018	31939	8.94083	72	0		61719	80605	46942	55613	53419	30153	54741.8	8.94083	72	35713.8		29836	19094	8702	1	1	53893	18587.8	8.94083	72	0		13248	52114	13305	42869	31115	30530.2	8.94083
21.3767	57450	65141	59911	92663	83265	129225	77523	67573	79093.9		7457	68436	52979	54678	64831	49676.2	21.3767	134	0		58198	1	70991	76097	58587	52146	52670	21.3767	134	0		43658	71463	93301	45830	68662	56329	63207.2	21.3767	134	0		1	71906	68357	46194	61407	49573	21.3767
15.23	38903	1	58273	169271	153121	1	200483	197412	102183		1	137214	1	1	1	27443.6	15.23	73	0		1	63564	3559	1	1	1	11187.8	15.23	73	-90995.3		1	1	151416	159947	67423	213072	98643.3	15.23	73	0		27483	1	82459	13731	1	24735	15.23
19.4708	1	101440	1	233802	137044	1	1	171352	80455.2		1	1	131049	1	1	26210.6	19.4708	66	0		99058	532	126430	192280	124345	37439	96680.7	19.4708	66	0		1	209560	1	1	1	1	34927.5	19.4708	66	0		1	152786	200331	1	1	70624	19.4708
8.12	1376	1	180206	90027	15530	292	140193	1	53453.2		27945	1	1	1	3780	6345.6	8.12	117	0		14620	1	219229	269057	250687	256107	168284	8.12	117	0		179849	36951	29662	980	435	20577	44742.3	8.12	117	0		1	28676	55813	17846	1	20467.4	8.12
18.6042	227103	1	93968	1	54785	57254	1	1	54139.2		1	128148	1	118712	157900	80952.4	18.6042	75	0		157937	1	207464	1	155962	1	86894.3	18.6042	75	0		1	70436	69767	84495	115907	1	56767.8	18.6042	75	0		1	1	1	168074	1	33615.6	18.6042
22.4775	256	4757	34980	99751	102277	1	1	92841	41858		1107	79638	114537	1	103262	59709	22.4775	106	0		150149	1	161217	1	90876	6217	68076.8	22.4775	106	0		325763	1	1	131202	347349	9220	135589	22.4775	106	0		3962	2707	1	1	1	1334.4	22.4775
20.9575	112660	1	57772	54138	80812	77950	27343	35465	55767.6		72858	43414	60424	70962	63188	62169.2	20.9575	84	0		89205	1	107178	160301	90026	1	74452	20.9575	84	0		3854	63379	60701	38852	81067	1	41309	20.9575	84	0		1	145561	34401	65484	43323	57754	20.9575
19.37	42573	35407	28071	1	223657	28067	1	20817	47324.2		5527	227243	1	69798	32845	67082.8	19.37	130	0		1	1	57069	1	291960	1	58172.2	19.37	130	0		1	19770	157456	13474	256121	40243	81177.5	19.37	130	0		1	486140	17289	1	1	100686	19.37
20.5575	391949	1	1	1	1	1	101291	243851	92137		1	1	1	271254	13142	56879.8	20.5575	73	0		1	1	1	377659	1	245225	103815	20.5575	73	0		1	1	113943	1	1	1	18991.3	20.5575	73	0		2205	1	57376	1	290562	70029	20.5575
9.77833	1	1	481806	27533	1	1	1	1	63668.1		1	1	1	1	79922	15985.2	9.77833	147	0		161644	1	371722	1	1	1	88895	9.77833	147	0		335940	1	1	102063	460121	1	149688	9.77833	147	0		1	67273	13365	1	1	16128.2	9.77833
14.7917	35975	44687	58508	69489	64068	83261	85348	49592	61366		63243	57527	47635	41931	49943	52055.8	14.7917	160	0		51176	11822	55552	62681	66146	35391	47128	14.7917	160	0		43945	69609	71933	59360	55894	38998	56623.2	14.7917	160	0		258	105018	68768	84451	87737	69246.4	14.7917
8.32583	1	1	1	48880	59590	125681	1	83745	39737.5		1	1	1	1	149824	29965.6	8.32583	73	0		1	1	1	99174	136271	1	39241.5	8.32583	73	0		1	30860	1	182792	1	45533	43198	8.32583	73	0		1	123069	1	193726	1	63359.6	8.32583
29.1717	1	1	1	7426	1356061	1	1	1	170437		18367	9880	26797	5388	1825	12451.4	29.1717	73	0		5027	1	1	29836	12918	29597	12896.7	29.1717	73	0		1	1	379953	15832	1	32944	71455.3	29.1717	73	0		1	1	1	116561	1	23313	29.1717
11.87	144025	1	208363	1	1	1	1	167405	64974.8		1	1	193691	126251	145799	93148.6	11.87	147	0		1	24670	1	1	1	1	4112.5	11.87	147	0		161412	1	1	1	1	1	26902.8	11.87	147	0		2460	1	395622	1	1	79617	11.87
21.2375	1	1	1	1	1	1	274783	1	34348.8		8674	58377	183793	1	1	50169.2	21.2375	115	0		134784	1	1	64496	67267	1	44425	21.2375	115	0		249040	1	15464	77579	280269	1	103726	21.2375	115	0		1	1	1	51920	264296	63243.8	21.2375
23.075	1	362244	1	1	1	1	1	247077	76165.9		1	1	1	1	1	1	23.075	73	0		1	2303	1	1	443909	1	74369.3	23.075	73	0		363315	1	1	1	33631	391230	131363	23.075	73	0		1	1	1	1	1	1	23.075
26.235	198790	1	264642	1	1	1	1	245627	88633		1	1	216619	181967	1	79717.8	26.235	149	0		1	1	1	1	1	142885	23815	26.235	149	0		1	1	343042	276037	1	1	103180	26.235	149	0		7555	1	1	1	1	1511.8	26.235
18.5292	1	1	1	1	150738	1	1	1	18843.1		12281	124945	221028	1	1	71651.2	18.5292	147	0		1	1	351983	91379	193126	462859	183225	18.5292	147	164382		1	1	36840	1	1	1	6140.83	18.5292	147	0		1	1	156504	1	192584	69818.2	18.5292
26.5558	1	12263	1	15023	22077	28303	27142	1	13101.4		1	56488	410716	1	40709	101583	26.5558	89	0		2368	1855	32389	17882	13610	368267	72728.5	26.5558	89	0		22762	42518	623390	1	23455	31004	123855	26.5558	89	0		1	2569	44346	79242	19896	29210.8	26.5558
24.295	1	151197	98473	29401	287240	59819	61040	127960	101891		1	1	1	1	153039	30608.6	24.295	73	0		82721	161	96956	120742	1	1	50097	24.295	73	0		100585	78646	141577	1	1	175389	82699.8	24.295	73	0		1	16428	1	34751	53299	20896	24.295
24.5158	11043	59196	1	68255	1	18267	40831	112755	38793.6		1	38261	1	67141	96502	40381.2	24.5158	75	0		290680	3930	54603	22864	113993	150153	106037	24.5158	75	0		187383	49874	16991	118918	52013	115045	90037.3	24.5158	75	0		3121	23329	81623	13107	19118	28059.6	24.5158
17.8983	11922	84865	11198	36638	1	42874	56556	22449	33312.9		1367	20295	4530	8057	51385	17126.8	17.8983	174	0		940861	1	4720	1255	35107	76161	176351	17.8983	174	0		17736	57209	24461	19193	3202	16545	23057.7	17.8983	174	0		1	107788	45880	14904	47829	43280.4	17.8983
16.5808	1	154736	14057	138145	63791	1	120394	132180	77913.1		1	1	1	1	1	1	16.5808	73	-77912.1		76160	1	1	97753	1	811154	164178	16.5808	73	0		1	150444	1	1	1	1	25074.8	16.5808	73	0		12009	78581	1	90151	62132	48574.8	16.5808
22.3917	1	1	90024	1	1	158195	163139	1	51420.4		1	112828	1	71527	1	36871.6	22.3917	102	0		1	1	111606	141779	110957	1	60724.2	22.3917	102	0		1	167325	47458	1	115355	1	55023.5	22.3917	102	0		1	1	1	187344	215706	80610.6	22.3917
8.1075	1	1	157144	1	1	1	52523	122561	41529.1		1	131517	1	130200	150914	82526.6	8.1075	79	0		1	1	98650	212355	113567	133549	93020.5	8.1075	79	0		153408	72420	1	1	1	169136	65827.8	8.1075	79	0		1	1	85937	1	1	17188.2	8.1075
24.9917	1	481941	1	1	1	1	1	637782	139966		1083	1	1	452408	1	90698.8	24.9917	86	0		1	1	1	1	1	1	1	24.9917	86	0		1	1	1	1	1	434978	72497.2	24.9917	86	0		573	14609	1	6679	6495	5671.4	24.9917
13.225	1	1	127734	1	35254	32612	1	10471	25759.4		185788	113618	1	149421	53332	100432	13.225	147	74672.6		1	214517	1	75139	1	1	48276.7	13.225	147	0		7419	96919	19653	1	1	42028	27670.2	13.225	147	0		69141	83416	134686	77500	68609	86670.4	13.225
21.355	47429	49588	64940	97983	60345	131002	79389	67518	74774.2		1	69384	52033	41345	63763	45305.2	21.355	99	0		60698	1	56206	78188	58196	40659	48991.3	21.355	99	0		47126	71241	95045	45980	72581	48876	63474.8	21.355	99	0		1	69786	68766	46030	63653	49647.2	21.355
22.1858	68333	1	1	1	115105	1	148875	97324	53705.1		1	127642	73535	79207	97870	75651	22.1858	113	0		1	1	87903	1	1	1	14651.3	22.1858	113	0		94751	1	1	104173	121114	59094	63189	22.1858	113	0		18834	205021	1	1	174098	79591	22.1858
19.4417	31911	1	74288	1	84655	112524	70391	76972	56342.9		44276	1	65298	1	1	21915.4	19.4417	76	0		56803	1	46331	100244	94858	1	49706.3	19.4417	76	0		72943	94377	114994	77032	102580	41317	83873.8	19.4417	76	0		1	147149	94693	150518	61797	90831.6	19.4417
26.2183	188017	1	265078	1	1	1	1	247473	87571.6		1	1	208088	172699	4733	77104.4	26.2183	131	0		433	1	1	1	1	141299	23622.7	26.2183	131	0		1	1	341525	267963	1	1	101582	26.2183	131	0		1865	1	1	1	1	373.8	26.2183
26.3183	29761	67784	40681	87690	82547	1	102830	46084	57172.2		136306	1	38276	34607	65938	55025.6	26.3183	61	0		17786	7166	58840	86091	84558	26824	46877.5	26.3183	61	0		71392	1	73456	45160	83956	1	45661	26.3183	61	0		1	18166	1	124604	90803	46715	26.3183
22.3842	1	1	1	1	157048	186698	197964	1	67714.4		1	1	1	112979	126724	47941.2	22.3842	134	0		130189	448	140194	168118	1	1	73158.5	22.3842	134	0		1	167578	1	1	1	1	27930.5	22.3842	134	0		1	1	1	219526	221850	88275.8	22.3842
24.9667	1	126671	165106	29886	1	1	21024	1	42836.4		11977	63845	1	118172	139431	66685.2	24.9667	148	0		84764	1	148009	462269	1	161155	142700	24.9667	148	0		1	1	1	1	1	1	1	24.9667	148	0		1	196188	1	48732	22690	53522.4	24.9667
10.9308	1	1	19848	1	1	1	1	1	2481.88		53562	1	9344	22456	12472	19567	10.9308	77	0		1	116344	23869	1	18801	10286	28217	10.9308	77	0		20707	9898	2234	1	1	1679047	285315	10.9308	77	0		19309	1	1	1	1	3862.6	10.9308
10.3892	1	85760	96115	1	1	155247	144663	1	60223.6		318763	1	78333	79928	1	95405.2	10.3892	132	0		1	1	1	1	1	73079	12180.7	10.3892	132	0		1	1	1	1	111201	1	18534.3	10.3892	132	0		1	168838	1	149624	159778	95648.4	10.3892
10.5517	1	1	1	1	1	1	1	1	1		95244	1	1	1	1	19049.6	10.5517	75	0		1	236888	1	1	1	1	39482.2	10.5517	75	0		1	1	1375338	1	1	1	229224	10.5517	75	0		57525	68116	1	1	1	25128.8	10.5517
18.1117	37612	42053	61565	1	64187	50160	47308	55991	44859.6		7513	76020	52456	45202	54905	47219.2	18.1117	71	0		52841	433	45739	63577	72474	27219	43713.8	18.1117	71	0		52866	63695	21969	65560	75850	1	46656.8	18.1117	71	0		263945	48645	87092	70653	92041	112475	18.1117
22.2067	1	1	1	100180	1	143797	128031	84049	57007.6		1	109471	54186	1	83163	49364.4	22.2067	85	0		83615	1	1	1	1	34591	19701.7	22.2067	85	0		80262	1	1	85230	102150	40974	51436.3	22.2067	85	0		116716	174144	1	1	149730	88118.4	22.2067
11.0133	1	1	1	51891	1	78491	1	1	16298.5		1	1	1	1	1	1	11.0133	75	0		124636	514949	1	1	1	1	106598	11.0133	75	0		1	54615	562727	1	85175	1	117087	11.0133	75	0		133437	75620	30027	1	87352	65287.4	11.0133
26.0117	32864	70202	74221	55804	18453	119535	79875	71027	65247.6		42066	88324	44856	46457	70798	58500.2	26.0117	60	0		9754	4359	60382	86126	14402	20129	32525.3	26.0117	60	0		70555	84239	83000	64245	77634	34416	69014.8	26.0117	60	0		1	5083	80793	26123	60380	34476	26.0117
21.82	19482	39649	38734	100444	15309	25306	54966	64185	44759.4		13563	39194	47806	66777	55064	44480.8	21.82	101	0		250116	1	47153	8533	1	212958	86460.3	21.82	101	0		64601	76409	8204	48534	48693	47428	48978.2	21.82	101	0		1	67321	93928	36270	101624	59828.8	21.82
10.6317	1	1	1	1	1	1	1	1	1		1	1	1	1	1	1	10.6317	75	#DIV/0!		1	193430	1	1	1	1	32239.2	10.6317	75	0		1	1	407332	1	1	830070	206234	10.6317	75	0		1	1	1	1	1	1	10.6317
22.5483	514551	1	1	1	1	1	1	1	64319.8		1	1	1	590905	1	118182	22.5483	75	0		1	2919	1	212652	1	1	35929.2	22.5483	75	0		1	84961	1	1	1	503148	98018.8	22.5483	75	0		17322	1	1	1	1	3465.2	22.5483
29.0883	14419	14309	17248	27569	346308	12280	74126	10086	64543.1		2031	10647	43639	20668	20785	19554	29.0883	73	0		32099	128656	14963	1	13272	69382	43062.2	29.0883	73	0		1	32627	118253	1	12249	186	27219.5	29.0883	73	0		504755	92336	79909	41670	80722	159878	29.0883
22.9183	240522	80184	1	1	8881	1	12032	99595	55152.1		15128	46813	134017	1	22846	43761	22.9183	75	0		1	1	1	137170	1	1	22862.5	22.9183	75	0		123347	4284	110824	1	76466	153983	78150.8	22.9183	75	0		1	1	1	89935	99071	37801.8	22.9183
9.29667	1	105617	41309	1	1	75754	1	72049	36841.6		1	12523	73405	98108	131400	63087.4	9.29667	147	0		1	53884	1	115043	132220	1	50191.7	9.29667	147	0		44609	1	410361	57681	1	1	85442.3	9.29667	147	0		1	28403	37742	1	41342	21497.8	9.29667
10.71	27432	26632	29769	37048	34644	44176	41282	31353	34042		107959	37722	28729	28027	27196	45926.6	10.71	92	0		26829	396137	34583	35683	35032	25060	92220.7	10.71	92	0		30402	33606	272	34586	34438	1	22217.5	10.71	92	0		280990	50760	34281	44908	47438	91675.4	10.71
24.9392	11131	36834	40503	21356	418433	17171	16119	31116	74082.9		8389	44512	16054	26093	31295	25268.6	24.9392	183	0		56039	1	28059	381499	25806	110326	100288	24.9392	183	0		16727	55506	138626	34309	10314	25124	46767.7	24.9392	183	0		1	161756	24842	39316	17247	48632.4	24.9392
8.86333	273505	50282	1	71205	54177	68758	1	69052	73372.6		1	71329	59487	57683	60708	49841.6	8.86333	74	0		113887	1	75126	63371	78469	1	55142.5	8.86333	74	0		1	15399	2871	1	4173	63889	14389	8.86333	74	0		1	1	15021	87252	13514	23157.8	8.86333
18.0392	154816	163297	1	182061	1	1	1	90915	73886.6		1	1	127956	137647	1	53121.2	18.0392	66	0		201484	658	1	1	110076	90391	67101.8	18.0392	66	0		1	1	1	106456	1	1	17743.5	18.0392	66	0		1	1	1	1	1	1	18.0392
25.0358	1	171037	1	1	971697	1	1	127408	158768		10815	1	86984	1	1	19560.4	25.0358	75	0		1	2010	86708	1	1	1	14787	25.0358	75	0		1	1	1	1	102081	385605	81281.7	25.0358	75	0		1	1	1	1	4038	808.4	25.0358
14.1425	1	321650	1	1	1	1	1	342513	83021.1		1	1	1	1	347339	69468.6	14.1425	301	0		364492	1	1	1	1	252971	102911	14.1425	301	0		1	1	1	1	1	1	1	14.1425	301	0		1	1	1	11061	1	2213	14.1425
12.6467	37113	56043	1	1	43699	1	96938	68984	37847.5		60895	75984	87458	1	73602	59588	12.6467	100	0		56525	23508	74498	127740	102762	71843	76146	12.6467	100	0		86121	101127	53139	69352	1	61566	61884.3	12.6467	100	0		7952	1	104200	46622	98849	51524.8	12.6467
10.98	89687	30541	79929	1	106493	1	1	60284	45867.1		322610	69758	72050	43118	11910	103889	10.98	79	0		64370	279185	18631	68051	5532	95549	88553	10.98	79	0		103606	1	1	1	1	79328	30489.7	10.98	79	0		1	84729	1	1	1	16946.6	10.98
10.6342	1	1	56955	41007	1	77557	95640	59091	41281.6		246599	82827	45484	12843	1	77550.8	10.6342	133	0		1	220880	1	1	73890	1	49129	10.6342	133	0		54390	44635	54271	1	55145	1	34740.5	10.6342	133	0		94424	79400	24342	118966	64889	76404.2	10.6342
17.0658	84479	128001	45966	34063	1	68399	36785	81068	59845.2		9789	67561	27472	15561	29778	30032.2	17.0658	115	0		125758	789	32409	28123	61231	1	41385.2	17.0658	115	0		163769	32320	11751	172210	17478	91243	81461.8	17.0658	115	0		1	31118	46927	79072	20988	35621.2	17.0658
19.4825	1	1	117091	179661	1	1	1	132807	53695.5		1	1	1	1	1	1	19.4825	131	0		137923	4131	1	1	213889	102308	76375.5	19.4825	131	0		1	187387	1	130449	1	1	52973.3	19.4825	131	0		2688	368371	151956	1	1	104603	19.4825
10.5642	1	1	1	16972	1	1	1	17153	4266.38		26465	1	15707	1	1	8435	10.5642	74	0		1	21402	1	1	1	1	3567.83	10.5642	74	0		1	5749	1221974	1	1	548274	296000	10.5642	74	0		1	16320	1	1	13526	5969.8	10.5642
22.3692	73408	1	1	1	1	152399	146416	1	46528.5		1	106211	80199	63254	1	49933.2	22.3692	70	0		1	1036	1	122343	1	1	20563.8	22.3692	70	0		65881	148973	54913	1	1	1	44961.7	22.3692	70	0		61238	1	1	171906	188891	84407.4	22.3692
11.0817	88874	53335	32743	56275	31096	29490	43583	25275	45083.9		31836	33674	228562	70323	56972	84273.4	11.0817	116	0		106451	9077	63138	93913	43143	74849	65095.2	11.0817	116	0		49327	27336	12068	72267	38471	192936	65400.8	11.0817	116	0		2041	31040	39811	51242	33129	31452.6	11.0817
36.0967	1	453923	134688	1	1	1	1	172461	95134.6		1	1	219151	1	1	43831	36.0967	75	0		1	1	67686	1	1	1	11281.8	36.0967	75	0		487977	1	1	292995	106987	579	148090	36.0967	75	0		1	1	453	1	1	91.4	36.0967
9.75083	1	1	1	128011	12698	1	1	60818	25191.5		21513	58721	20225	1	126181	45328.2	9.75083	75	0		157413	451403	116632	1	1	1	120908	9.75083	75	0		1	1	1	3526	188113	1	31940.5	9.75083	75	0		92700	202684	9022	26390	1	66159.4	9.75083
27.15	275725	1	186435	20393	48088	1	22139	90478	80407.5		10113	1	1	109376	22454	28389	27.15	73	0		71625	1505	35884	1	33761	188768	55257.3	27.15	73	0		65903	115606	75012	79900	29564	1	60997.7	27.15	73	0		1	24356	134231	40159	10814	41912.2	27.15
26.4992	1	39153	1	53881	89432	1	89310	1	33972.5		48134	1	1	1	163287	42284.8	26.4992	75	0		4282	1904	124536	77013	46943	1	42446.5	26.4992	75	0		84224	178866	1	1	53100	104023	70035.8	26.4992	75	0		2554	2966	143170	228714	66997	88880.2	26.4992
18.1767	100466	1	254215	1	1	1	1	1	44335.9		1	1	1	141296	1	28260	18.1767	66	0		1	1	1	1	316169	1	52695.7	18.1767	66	0		1	1	1	241128	282326	1	87243	18.1767	66	0		1	1	273161	1	1	54633	18.1767
18.3058	40401	71832	75803	95854	18958	32897	1	80275	52002.6		17295	44487	63988	34896	38908	39914.8	18.3058	71	0		82652	726	53944	49504	60644	1	41245.2	18.3058	71	0		62742	58902	19282	53611	70052	56157	53457.7	18.3058	71	0		283561	1	60574	21374	70422	87186.4	18.3058
8.99667	147488	1	1	142012	1	1	97047	1	48319		1	176540	1	1	1	35308.8	8.99667	73	0		1	1	1	25575	154310	1	29981.5	8.99667	73	0		1	1	1	193565	1	1	32261.7	8.99667	73	0		1	232796	1	1	1	46560	8.99667
26.0317	1	67710	80876	46438	13869	92496	65233	78781	55675.5		31084	99089	70266	54452	77700	66518.2	26.0317	118	0		7780	2354	65222	77648	11926	1	27488.5	26.0317	118	0		75662	95364	9808	89465	64660	53582	64756.8	26.0317	118	0		1	3594	100063	21615	50087	35072	26.0317
17.5275	1	1	1	102736	78650	127341	112229	79920	62609.9		97876	1	1	1	60411	31658	17.5275	113	0		77898	22626	1	109399	1	34533	40743	17.5275	113	0		1	1	79288	1	1	50118	21568.3	17.5275	113	0		1	1	88702	376	141602	46136.4	17.5275
18.2508	168395	1	63726	1	1	1	1	1	29015.9		1	1	1	613235	1	122648	18.2508	103	0		1	578	1	44959	1	148098	32273	18.2508	103	0		1	39176	14340	1	1	170274	37298.8	18.2508	103	0		1	27563	1	47858	1	15084.8	18.2508
22.3383	64257	1	76746	95126	1	114110	1	70705	52618.4		1	92874	1	1	1	18575.6	22.3383	146	0		1	1	77095	102381	94211	1	45615	22.3383	146	0		70506	96285	101635	1	1	61858	55047.7	22.3383	146	0		1	152229	100263	133525	1	77203.8	22.3383
19.3675	51523	71816	1	1	146517	1	1	1	33732.6		1208	167102	103973	1	92917	73040.2	19.3675	60	0		113528	1573	109154	154454	159854	26903	94244.3	19.3675	60	0		1	1	3947	1	159521	50249	35620	19.3675	60	0		167	251484	1	229893	9233	98155.6	19.3675
13.1125	179996	1	153794	84143	1	13986	1	27822	57468		1	85091	1	170841	6874	52561.6	13.1125	147	0		136517	1	1	111918	1	1	41406.5	13.1125	147	0		50853	104609	26302	1	1	91206	45495.3	13.1125	147	0		2330	75100	137567	1	107492	64498	13.1125
12.1742	1	1	1	109640	47053	28284	95644	2558	35397.8		1	1	165963	79218	1	49036.8	12.1742	147	0		185123	1	105002	1	1	57721	57974.8	12.1742	147	0		99362	133349	16795	1	1	120771	61713.2	12.1742	147	0		4010	86558	161122	1	62812	62900.6	12.1742
10.6517	32120	31813	38728	28700	1	51697	63167	39176	35675.2		158117	52945	31241	32109	29827	60847.8	10.6517	86	0		1	130841	15633	18053	47215	22349	39015.3	10.6517	86	0		39048	34690	105419	54134	36269	281901	91910.2	10.6517	86	0		57603	56996	16872	77606	44066	50628.6	10.6517
18.3067	1	1	78399	114564	1	1	1	105889	37357.1		24035	56996	84836	133476	1	59868.8	18.3067	117	0		120566	1	115013	57150	105640	1	66395.2	18.3067	117	0		96089	45048	15559	68739	72046	1	49580.3	18.3067	117	0		1	1	60736	54340	63760	35767.6	18.3067
22.4308	1	1	136369	158253	167633	1	1	1	57782.5		1	169865	117169	1	120740	81555.2	22.4308	117	0		127360	1	135502	1	162902	1	70961.2	22.4308	117	0		120621	1	1	149195	159295	1	71519	22.4308	117	0		1	1	1	1	1	1	22.4308
24.9375	13652	51603	51520	26018	1	21287	19609	39736	27928.2		10187	53113	19695	35820	37669	31296.8	24.9375	211	0		67364	1	35291	463568	31565	166250	127340	24.9375	211	0		20952	67316	168555	41689	12562	1	51845.8	24.9375	211	0		1	194918	30371	47358	21286	58786.8	24.9375
17.0667	81224	107101	39885	39395	7598	63551	35340	80515	56826.1		9400	64507	18043	16201	36162	28862.6	17.0667	133	0		96468	1	24503	27732	61169	21776	38608.2	17.0667	133	0		159637	23838	9100	172928	19546	115973	83503.7	17.0667	133	0		1052	29050	47089	73702	22221	34622.8	17.0667
25.8475	68107	42551	62697	15720	93206	17108	55033	17900	46540.2		35623	27451	40873	15794	19344	27817	25.8475	103	0		14537	13768	13921	73682	17871	177556	51889.2	25.8475	103	0		9905	17842	175876	29994	20317	14610	44757.3	25.8475	103	0		1365	11386	37732	406514	106415	112682	25.8475
18.3917	1	1	61105	92511	40391	66932	116175	82700	57477		22596	42413	59419	76272	92968	58733.6	18.3917	101	0		111330	1	1	49009	1	106988	44555	18.3917	101	0		61105	112681	45921	56480	46170	1	53726.3	18.3917	101	0		205	9785	80749	38758	77803	41460	18.3917
22.4833	173993	185507	1	1	1	1	1	182381	67735.8		8452	1	179396	187216	1	75013.2	22.4833	189	0		1	1	203784	1	1	177485	63545.5	22.4833	189	0		186845	13955	1	1	1	179630	63405.5	22.4833	189	0		6282	17159	1	1	1	4688.8	22.4833
25.155	1	1	1	6436	476530	1	1	1	60371.5		1	58898	1	1	1	11780.4	25.155	73	0		1	1443	1	1	1	1	241.333	25.155	73	0		1	1	1	1	1	1283853	213976	25.155	73	0		2372	28217	1	17136	4971	10539.4	25.155
21.2592	1	114383	134982	143416	1	1	179302	1	71510.9		1	1	69052	1	1	13811.2	21.2592	76	0		89979	282	97442	1	1	1	31284.3	21.2592	76	0		125363	1	17272	50937	154869	61521	68327.2	21.2592	76	0		1	1	1	46159	165151	42262.6	21.2592
8.67917	20954	1	1	32891	1	1	3875	1	7215.62		21422	1	1	1	1	4285.2	8.67917	148	0		1	1	1	1	1	1	1	8.67917	148	0		1	505825	1	1	1	1	84305	8.67917	148	0		293479	1	407017	1	405916	221283	8.67917
17.4442	46864	49334	58506	64741	71304	67472	60106	51034	58670.1		50194	48868	56126	49733	61135	53211.2	17.4442	251	0		43599	10854	60763	69277	23343	48083	42653.2	17.4442	251	0		37466	71131	41676	33474	69795	50790	50722	17.4442	251	0		1	27907	50195	36410	79411	38784.8	17.4442
12.7117	1	33020	47084	64857	1	85213	78636	38840	43456.5		137651	64150	34257	32956	33065	60415.8	12.7117	86	0		48235	129296	36129	1	58659	25944	49710.7	12.7117	86	0		36491	63474	13011	53659	63953	30388	43496	12.7117	86	0		2799	102673	69222	83465	1	51632	12.7117
22.3308	86862	1	1	122952	1	150809	1	1	45078.5		1	1	85493	1	98787	36856.6	22.3308	116	0		1	1	97457	125563	111884	50865	64295.2	22.3308	116	0		83423	120342	130534	1	1	66705	66834.3	22.3308	116	0		1	189683	1	1	1	37937.4	22.3308
10.4392	1	54722	58699	72898	68524	96797	90190	59084	62614.4		1	74453	52690	1	1	25429.2	10.4392	71	0		60896	22428	65611	71349	69159	1	48240.7	10.4392	71	0		54389	72437	1	65066	67895	1	43298.2	10.4392	71	0		11343	106624	76082	1	92190	57248	10.4392
18.0758	229819	1	1	1	1	1	1	1	28728.2		1	1	1	237948	1	47590.4	18.0758	72	0		266362	1	1	1	156782	180631	100630	18.0758	72	0		1	1	1	1	1	247279	41214	18.0758	72	0		1	1	1	1	1	1	18.0758
22.3242	64165	1	76616	94352	1	110722	1	70368	52028.2		1	1	69167	1	71328	28099.6	22.3242	135	0		72719	1	1	103037	1	50058	37636.2	22.3242	135	0		70423	96743	98546	85790	90031	1	73589	22.3242	135	0		1	150752	1	1	118979	53946.8	22.3242
24.9508	90218	100672	1	1	1	1	22631	130817	43042.8		11227	66257	103834	88588	165061	86993.4	24.9508	72	0		1	1	115837	290724	1	89296	82643.3	24.9508	72	0		126748	1	1	1	1	81428	34696.7	24.9508	72	0		1	158539	1	44788	23026	45271	24.9508
21.4175	1	51023	61264	92779	54964	123442	84462	72468	67550.4		1	70005	59124	47685	66503	48663.6	21.4175	116	0		58718	1	60577	74991	60322	1	42435	21.4175	116	0		1	71124	88105	49022	68813	1	46177.7	21.4175	116	0		1	73961	70573	47731	65189	51491	21.4175
12.925	180746	1	61769	81121	1	19885	112230	34674	61303.4		1	102658	46418	133232	95519	75565.6	12.925	147	0		105562	1	108132	70417	1	1	47352.3	12.925	147	0		7419	88892	7244	67000	11334	1	30315	12.925	147	0		1	104741	1	1	84152	37779.2	12.925
18.305	50210	142586	121791	152404	12009	1	14812	1	61726.8		20588	57479	97169	113780	1	57803.4	18.305	98	0		155674	1	1	72702	84788	1	52194.5	18.305	98	0		1	1	1	68536	103934	99459	45322	18.305	98	0		1	10054	78445	10737	94580	38763.4	18.305
22.4092	132608	1	159235	1	185495	1	1	1	59667.9		1	200941	1	137288	155457	98737.6	22.4092	101	0		1	1381	165781	1	1	1	27861	22.4092	101	0		1	1	76017	188832	1	1	44142.2	22.4092	101	0		1	1	1	1	1	1	22.4092
13.1142	163322	1	1	86341	1	36803	89455	73854	56222.2		1	66422	1	158420	13610	47690.8	13.1142	73	0		99405	1	1	1	95975	1	32564	13.1142	73	0		1	67735	1	123960	1	155049	57791.2	13.1142	73	0		1	143981	88815	1	136617	73883	13.1142
38.0325	182702	2888	170227	1069	1	101013	12417	40521	63854.8		460	57570	361753	295526	33234	149709	38.0325	74	0		592	1	514	1	43920	62637	17944.2	38.0325	74	0		68592	101148	61818	67880	1	130	49928.2	38.0325	74	0		1	2062	11278	139330	1960	30926.2	38.0325
12.6867	25790	1	55081	73136	1	98374	1	1	31548.1		170845	75592	1	1	36952	56678.2	12.6867	89	0		55901	164249	37262	1	76059	1	55578.8	12.6867	89	0		1	1	13488	64322	72537	38144	31415.5	12.6867	89	0		3870	107798	81668	106506	77842	75536.8	12.6867
18.5592	1	154827	109758	1	60533	51633	71197	142913	73857.9		34413	81469	1	1	1	23177	18.5592	116	0		167407	1	1	84209	1	1	41936.7	18.5592	116	0		116438	1	17098	1	68163	201010	67118.5	18.5592	116	0		1	1	50004	85017	91334	45271.4	18.5592
9.92417	1	1	1	22592	1	7502	28720	1	7352.38		1	1	1	120938	71353	38458.8	9.92417	147	0		170858	1	24161	163813	1	1	59805.8	9.92417	147	0		1	5818	68509	97415	1	471564	107218	9.92417	147	0		1	31281	17433	1	35098	16762.8	9.92417
8.175	90034	1	117102	1	1	1	23825	1	28870.8		1	1	1	115967	117130	46620	8.175	79	0		1	749	71254	1	1	109949	30325.8	8.175	79	0		1	9981	36917	287930	1	161334	82694	8.175	79	0		156652	104083	1	91032	13699	73093.4	8.175
22.2567	65343	1	1	1	1	1	1	1	8168.75		391612	89083	64779	61554	1	121406	22.2567	119	0		1	1	75104	132048	1	1	34526	22.2567	119	0		72506	123892	140315	1	87521	1	70706	22.2567	119	70706		1	1	136179	189971	1	65230.6	22.2567
18.7775	67574	1	97396	117537	414	1	149532	84773	64653.5		709	1	64140	60954	81673	41495.4	18.7775	151	0		89710	1	419	287	113280	61792	44248.2	18.7775	151	0		1	1	123213	102531	1	66764	48751.8	18.7775	151	0		1	366	130176	1	159497	58008.2	18.7775
18.7175	75430	89918	3488	5929	71807	1	3947	1	31315.1		112086	148377	1	7147	113096	76141.4	18.7175	119	0		886	1	66768	1	1	1	11276.3	18.7175	119	0		112022	1	1	5681	146752	77222	56946.5	18.7175	119	0		941	198900	1202	133694	1	66947.6	18.7175
10.635	1	43815	51843	1	1	68087	89220	60046	39126.8		221653	73130	1	8142	1	60585.4	10.635	119	0		1	190203	1	1	67537	1	42957.3	10.635	119	0		52362	38773	15498	73617	46869	1	37853.3	10.635	119	0		77143	78449	20786	108243	54661	67856.4	10.635
21.3525	477755	1	1	1	1	1	1	1	59720.2		77887	1	1	1	1	15578.2	21.3525	100	0		1	1	615415	1	1	1	102570	21.3525	100	0		1	1	1	1	1	1	1	21.3525	100	0		1	1	1	1	1	1	21.3525
21.885	1	1	1	1	1	41076	159679	1	25095.1		13721	1	1	1	1	2745	21.885	147	0		1	12840	1	1	1	1	2140.83	21.885	147	0		1	91305	18068	1	1	117495	37811.8	21.885	147	0		1	115481	1	123108	486207	144960	21.885
26	1	65546	76781	42949	14122	87900	62267	73600	52895.8		27953	93345	60732	48602	1	46126.6	26	105	0		7333	2658	60829	75726	11344	1	26315.2	26	105	0		71540	89191	90235	79243	61706	44624	72756.5	26	105	0		117	3390	91892	31868	48787	35210.8	26
9.41583	2611	1	31486	1	14889	48322	50500	1	18476.4		75076	22834	1396	1	90039	37869.2	9.41583	118	0		1	155694	23857	31110	26652	1	39552.5	9.41583	118	0		496550	1	5641	355323	20000	1	146253	9.41583	118	0		17170	39926	1	60945	50583	33725	9.41583
26.6358	1	1	1	43122	76729	72658	79411	1	33990.5		1	1	1	1	1	1	26.6358	74	0		8741	398	1	1	1	1	1523.83	26.6358	74	0		1	128093	1	1	65181	1	32213	26.6358	74	0		296	7159	127853	1	51399	37341.6	26.6358
8.85833	124761	108347	127988	27672	1	41108	1	1	53734.9		1	109031	120540	104794	1	66873.4	8.85833	79	0		1	1	1	157333	1	1	26223	8.85833	79	0		1	133001	1	1	109248	140960	63868.7	8.85833	79	0		1	83555	67691	1	84567	47163	8.85833
21.2508	1	90550	117117	114608	117104	1	134109	1	71686.4		1	30466	70757	1	87448	37734.6	21.2508	98	0		69271	1	81003	30959	36418	1	36275.5	21.2508	98	0		110121	1	10475	34929	133433	60225	58197.3	21.2508	98	0		14259	1	1	28448	121828	32907.4	21.2508
8.9125	11959	52191	42326	42289	49284	41823	1	59097	37371.2		88155	83502	86912	76189	71886	81328.8	8.9125	136	43957.6		113951	1	65318	80568	93907	43335	66180	8.9125	136	0		86294	1	1166	77286	45718	84533	49166.3	8.9125	136	0		1	76786	1	61001	1	27558	8.9125
26.57	98481	17233	92777	19885	28728	42958	36258	86989	52913.6		19082	77077	98352	71134	60208	65170.6	26.57	321	0		2650	810	32872	30436	19160	80370	27716.3	26.57	321	0		31575	92317	187716	96757	19798	34857	77170	26.57	321	0		1	2885	71880	103978	18798	39508.4	26.57
19.4858	1	1	1	162914	55222	79741	41551	1	42429		8004	1	130006	1	1	27602.6	19.4858	170	0		1	1	1	127247	44463	135748	51243.5	19.4858	170	0		1	109955	41614	125122	61361	1	56342.3	19.4858	170	0		1	132257	300649	1	61877	98957	19.4858
9.56417	22406	1	75824	1	1	1	106999	1	25654.2		1	218089	1	1	1	43618.6	9.56417	221	0		1	163146	171229	1	1	90183	70760.2	9.56417	221	0		281122	180881	1	1	98995	1	93500.2	9.56417	221	0		81650	1	1	139863	1	44303.2	9.56417
25.9708	56798	60633	75005	43356	12984	83737	60467	72428	58176		29107	92219	65501	1	1	37365.8	25.9708	132	0		7335	878	60528	70725	11267	43824	32426.2	25.9708	132	0		68833	88365	101634	85270	59827	1	67321.7	25.9708	132	0		1	3185	94620	18732	46758	32659.2	25.9708
10.2192	1	80066	124474	1	1	1	1	1	25568.2		1	132600	105083	62295	6049	61205.6	10.2192	79	0		92079	1	1	1	1	1	15347.3	10.2192	79	0		1	133291	1	126600	1	96581	59412.5	10.2192	79	0		1	1	44762	1	1	8953.2	10.2192
24.3683	98346	65897	36340	57533	6221	11497	39484	76716	49004.2		5036	25229	71543	81347	131800	62991	24.3683	147	0		70267	22412	59963	15523	60438	50535	46523	24.3683	147	0		84301	74931	15276	82669	32738	70389	60050.7	24.3683	147	0		81049	46076	88370	9065	62573	57426.6	24.3683
16.6325	127923	112996	38504	169479	38693	1	1	118270	75733.4		1	34460	1	1	1	6892.8	16.6325	73	-68840.6		1	183786	1	13732	1	214691	68702	16.6325	73	0		1	1	35703	75301	1	80949	31992.7	16.6325	73	0		212384	9055	47564	33405	12313	62944.2	16.6325
9.71	1	312061	78529	1	1	1	310176	1	87596.4		1	1	1	153570	1	30714.8	9.71	75	0		1	459835	1	1	1	360718	136760	9.71	75	0		52023	1	1	1	48887	1	16819	9.71	75	0		1	1	1	1	1	1	9.71
21.9858	150392	163732	1	1	1	3491	1	1	39702.5		2994	120388	176658	227700	123177	130183	21.9858	74	0		1	514	1	3656	1	113365	19589.7	21.9858	74	0		1	1	1	200279	1	199738	66670.2	21.9858	74	0		1	1	1	76866	1	15374	21.9858
19.8317	1	4087	1	1	1	8912	1	1	1625.62		1	30181	1	1	79933	22023.4	19.8317	147	0		1	578	99332	1	1	93045	32159.7	19.8317	147	0		41048	22217	1	1	85068	10714	26508.2	19.8317	147	0		1194976	84634	1	8022	1	257527	19.8317
9.99833	1	89777	1	1	1	1	187369	73543	43836.8		1	1	1	1	1	1	9.99833	79	0		1	1	42840	135362	37544	108437	54030.8	9.99833	79	0		104588	125711	1	92897	99859	113144	89366.7	9.99833	79	0		14978	1	1	1	1	2996.4	9.99833
10.0433	1	1	1	78816	1	25210	1	1	13004		291897	1	105502	72115	5689	95040.8	10.0433	79	0		105564	1	1	129681	1	107920	57194.7	10.0433	79	0		108670	128676	1	1	103973	1	56887	10.0433	79	0		1	51453	15436	169703	1	47318.8	10.0433
21.4217	83185	79312	47699	41852	114098	50459	53050	96649	70788		1	29976	33233	77151	138354	55743	21.4217	192	0		44555	1	1	1	37457	131016	35505.2	21.4217	192	0		51081	93769	1	55977	58441	71690	55159.8	21.4217	192	0		1	26067	66534	33854	32572	31805.6	21.4217
23.2625	324985	1	1	1	71356	71360	129445	1	74643.8		1	164900	1	1	1	32980.8	23.2625	73	0		1	1	23441	1	1	357941	63564.3	23.2625	73	0		185287	44374	63941	29864	1	1	53911.3	23.2625	73	0		1	1	11869	1	1	2374.6	23.2625
24.9533	89014	1	141539	53851	113984	79781	9165	130095	77178.8		1	1	98740	1	144031	48554.8	24.9533	70	0		97241	1	1	126832	64521	47688	56047.3	24.9533	70	0		1	104621	42145	131017	153623	1	71901.3	24.9533	70	0		1	1	70068	1	1	14014.4	24.9533
18.1758	80014	1	135884	173981	1	1	1	1	48735.5		1	1	114679	100504	1	43037.2	18.1758	88	0		136393	1	1	1	165337	74462	62699.2	18.1758	88	0		125105	1	1	144114	1	80877	58349.8	18.1758	88	0		1	1	181707	1	1	36342.2	18.1758
24.9958	1	110961	118346	12032	176376	1	8072	111757	67193.2		4521	44389	1	112917	94714	51308.4	24.9958	217	0		25932	1	106986	154928	18254	114813	70152.3	24.9958	217	0		85572	47332	57347	1	1	114587	50806.7	24.9958	217	0		1	58117	28366	22645	12694	24364.6	24.9958
24.9608	1	471545	1	1	1	1	1	607731	134910		1065	1	1	430265	1	86266.6	24.9608	100	0		1	1	1	1	1	234797	39133.7	24.9608	100	0		1	1	1	1	1	1	1	24.9608	100	0		247	20164	1	3720	1	4826.6	24.9608
18.2333	207655	1	1	368128	1	1	1	1	71973.6		1	1	211283	255219	1	93301	18.2333	72	0		1	1	1	1	1	206302	34384.5	18.2333	72	0		1	1	1	1	1	208893	34816.3	18.2333	72	0		12331	66760	1	1	1	15818.8	18.2333
18.1367	1	1	75527	78606	84599	1	57025	1	36970.1		11033	100445	57485	61213	1	46035.4	18.1367	77	0		1	864	1	88178	95509	1	30759	18.1367	77	0		1	81613	28117	76806	95164	1	46950.3	18.1367	77	0		1527	62024	113830	92955	121525	78372.2	18.1367
21.9608	1	1	95853	56832	27749	68287	1	110690	44926.8		17755	1	1	1	1	3551.8	21.9608	74	0		341472	895	159620	51225	1	1	92202.3	21.9608	74	0		154869	106834	47286	1	97931	1	67820.3	21.9608	74	0		1832	21539	230635	1	1	50801.6	21.9608
26.245	173944	1	208512	1	1	1	1	198581	72630.2		1	1	183642	160103	1	68749.6	26.245	189	0		1	1	1	1	1	131993	21999.7	26.245	189	0		1	1	272026	230795	1	1	83804.2	26.245	189	0		1222	38392	1	1	1	7923.4	26.245
21.36	1	80277	149718	1	115550	1	1	1	43193.8		35219	1	110787	1	193209	67843.4	21.36	61	0		1	1	1	249698	209985	1	76614.5	21.36	61	0		140994	1	1	93014	165578	1	66598.2	21.36	61	0		1	1	1	1	1	1	21.36
8.08167	1	1	1	1	85844	1	1	1	10731.4		187720	84559	82865	177466	1	106522	8.08167	147	95790.8		247899	1	1	129141	99830	1	79478.8	8.08167	147	0		1	1	1	114534	97259	47648	43240.7	8.08167	147	0		1	27412	1	88520	1	23187	8.08167
12.12	1	1	136726	122886	43327	33075	110084	14862	57620.2		1	153547	1	91669	1	49043.8	12.12	147	0		208657	1	93173	144817	1	1	74441.7	12.12	147	0		1	1	1	1	94995	1	15833.3	12.12	147	0		3542	1	1	29215	79324	22416.6	12.12
21.9625	1	136617	72905	57240	11927	24558	1	105230	51059.9		8659	37249	111948	1	45250	40621.4	21.9625	101	0		356822	1	143991	16517	1	1	86222.2	21.9625	101	0		128858	45187	21071	1	103895	1	49835.5	21.9625	101	0		205	1	243739	1	1	48789.4	21.9625
21.45	1	1	1	1	591794	1	75691	125638	99141		1	1	1	1	156441	31289	21.45	100	0		1	1	1	1	1	1	1	21.45	100	0		1	117352	6323	1	1	1	20613.2	21.45	100	0		247	1	78344	1	1	15718.8	21.45
18.61	48824	69418	50068	82792	40632	43528	73893	7561	52089.5		6997	57239	104903	100927	63368	66686.8	18.61	232	0		37539	1	34997	74302	85954	229258	77008.5	18.61	232	0		12031	14320	102327	88019	24164	22649	43918.3	18.61	232	0		1	17301	13309	80036	10692	24267.8	18.61
26.0408	1	1	1	1	1	1	1	1	1		1	1	74302	495900	1	114041	26.0408	75	0		1	1	1	1	1	142276	23713.5	26.0408	75	0		1	1	249670	1	1	373878	103925	26.0408	75	0		952	1	1	1	1	191.2	26.0408
19.4025	1	1	1	1	183207	1	1	1	22901.8		1	190709	149340	136366	1	95283.4	19.4025	86	0		1	1	1	185781	168061	75037	71480.3	19.4025	86	0		1	1	1	1	175626	1	29271.8	19.4025	86	0		1	260541	1	222952	1	96699.2	19.4025
9.75167	1	1	124338	1	1	8696	111151	89906	41761.9		1	107386	101180	1	1	41713.8	9.75167	79	0		102976	429689	46927	1	15641	108439	117279	9.75167	79	0		1	1	3415	107085	127058	109207	57794.5	9.75167	79	0		1	15459	1	1	1	3092.6	9.75167
22.4075	102969	1	1	1	1	1	186919	1	36236.8		61278	1	1	102507	1	32757.6	22.4075	117	0		1	3407	124852	167331	1	1	49265.5	22.4075	117	0		1	1	127647	1	1	1	21275.3	22.4075	117	0		1	1	163463	267368	200743	126315	22.4075
10.3467	54856	61901	63975	1	1	1	99127	61319	42647.6		23968	1	63582	57592	64712	41971	10.3467	76	0		69784	1	69222	50525	29344	53407	45380.5	10.3467	76	0		64791	1	1	1	75606	4152	24092	10.3467	76	0		754	1	1	108952	107476	43436.8	10.3467
18.7367	1	1	71466	101631	68823	72756	79947	111426	63256.4		57546	104650	87920	1	1	50023.6	18.7367	100	0		1	1	91795	1	156496	1	41382.5	18.7367	100	0		1	66077	1	86504	87938	1	40087	18.7367	100	0		3446	118055	89559	119714	1	66155	18.7367
36.4775	1	126788	1	1	71548	99507	1	1	37231		1	78577	1	189331	1	53582.2	36.4775	73	0		126006	7142	1	1	137957	131133	67040	36.4775	73	0		161289	3930	5393	160615	180694	1	85320.3	36.4775	73	0		57647	2973	440	47247	3299	22321.2	36.4775
26.4983	1	25034	83948	30790	47128	50598	56125	87593	47652.1		28973	97715	1	69947	78118	54950.8	26.4983	205	0		6792	1	56681	35836	32297	1	21934.7	26.4983	205	0		38635	78708	1	80005	47686	53260	49715.8	26.4983	205	0		1	4716	84822	161726	39386	58130.2	26.4983
10.1633	1	1	1	1	1	35803	212515	1	31040.5		1	1	108133	64800	3306	35248.2	10.1633	79	0		95569	1	1	129131	24874	107484	59510	10.1633	79	0		108833	1	121636	115973	140545	1	81164.8	10.1633	79	0		1	109387	512	1	1	21980.4	10.1633
14.23	1	382792	1	1	1	1	1	49587	54048.1		1	1	1	1	1	1	14.23	74	0		1	2925	50101	1	99683	293236	74324.5	14.23	74	0		1	1	1	77329	1	356529	72310.3	14.23	74	0		1	1	1	1	1	1	14.23
9.8125	1	104551	1	65296	44032	39678	15950	77322	43353.9		64823	48089	58811	94709	42340	61754.4	9.8125	148	0		112882	45288	1	103222	84148	47913	65575.7	9.8125	148	0		1	45779	1	56231	1	1	17002.3	9.8125	148	0		34685	54888	32797	38834	67826	45806	9.8125
12.4233	11237	33638	51257	40238	19504	21154	33684	48405	32389.6		63080	51818	76929	43204	67477	60501.6	12.4233	77	28112		130275	70194	39445	39374	56775	44476	63423.2	12.4233	77	31033.5		46419	55119	47487	59043	34035	23963	44344.3	12.4233	77	0		47655	56177	61738	46072	59735	54275.4	12.4233
19.3325	271185	117215	1	1	1	77988	64686	1	66384.8		8106	1	1	1	136491	28920	19.3325	128	0		1	1	170559	1	1	1	28427.3	19.3325	128	0		143207	120286	8605	1	133060	97871	83838.3	19.3325	128	0		1	177499	1	1	39856	43471.6	19.3325
14.7933	23889	31230	44998	57475	54946	71489	69178	41742	49368.4		45778	52585	38599	28798	37388	40629.6	14.7933	99	0		40449	7641	46587	57658	59345	20046	38621	14.7933	99	0		31265	54380	66482	49494	51778	28461	46976.7	14.7933	99	0		1	89574	62680	76141	78039	61287	14.7933
17.6333	1	10012	141890	70633	116912	30740	1	36539	50841		1	13635	32102	170781	1	43304	17.6333	147	0		49360	8117	117386	40904	1	102994	53127	17.6333	147	0		13097	88842	85912	1	18134	64312	45049.7	17.6333	147	0		4546	35587	42106	93534	1	35154.8	17.6333
9.08083	6397	48659	36764	50819	24671	33678	29160	1	28768.6		84070	54968	55146	85178	39469	63766.2	9.08083	77	34997.6		114577	135642	66744	71879	103780	1	82103.8	9.08083	77	53335.2		58113	1	1	62462	39605	1	26697.2	9.08083	77	0		3879	83085	40070	68020	1	39011	9.08083
38.18	62740	1	1	13775	1	1	51225	1	15968.1		1	1	1	1	1	1	38.18	73	0		1	112704	1	1	1	1	18784.8	38.18	73	0		1	1	1	25243	16393	1	6940	38.18	73	0		183546	38548	24881	33017	50027	66003.8	38.18
24.0842	10536	64835	38537	52713	8048	27819	43965	85731	41523		1555	24751	8215	7106	98389	28003.2	24.0842	70	0		178153	885	5502	1	14155	55634	42388.3	24.0842	70	0		101590	54920	4099	82790	15105	36460	49160.7	24.0842	70	0		186149	56236	72234	4941	21822	68276.4	24.0842
16.0983	1	1	1	1	1	1	1	12000	1500.88		200717	1	1	1	1	40144.2	16.0983	100	0		1	911	1	1	1	1486229	247857	16.0983	100	0		1	1	1	1	1	1	1	16.0983	100	0		1	1	1	1	1	1	16.0983
17.6908	88055	83585	59893	44397	22583	14626	19706	60231	49134.5		26188	26857	81065	97620	62366	58819.2	17.6908	82	0		102537	1	53639	79756	63102	1	49839.3	17.6908	82	0		43025	81451	21183	49498	39141	89371	53944.8	17.6908	82	0		562	46125	32754	62974	39500	36383	17.6908
18.8217	36674	49333	66348	92045	1	1	133538	109408	60918.5		5205	1	75270	46427	42325	33845.6	18.8217	66	0		45227	1	44547	1	112659	27436	38311.8	18.8217	66	0		49451	1	6427	83993	1	73942	35635.8	18.8217	66	0		1985	12701	101370	1	160160	55243.4	18.8217
36.6142	1	79885	1	14726	55094	1	62491	75424	35952.9		1	1	125282	1	1	25057.2	36.6142	73	0		1	146409	114491	35507	105395	1	66967.3	36.6142	73	0		1	13646	37807	124134	1	1	29265	36.6142	73	0		300195	61352	30869	43166	67160	100548	36.6142
25.4817	1	1	197501	1	160030	1	1	1	44692.1		27767	1	1	256274	392564	135321	25.4817	73	0		1	14509	1	1	1	96558	18511.8	25.4817	73	0		1	1	101424	1	1	408995	85070.5	25.4817	73	0		19200	31459	1	1	1	10132.4	25.4817
18.825	100789	84921	44085	83070	40743	1	70305	93359	64659.1		16341	1	78347	70054	82464	49441.4	18.825	100	0		85518	1	1	1	148791	149673	63997.5	18.825	100	0		51784	1	1	74923	1	110816	39587.7	18.825	100	0		7299	36631	77901	1	96372	43640.8	18.825
8.91583	67768	1	132320	81158	1	1	11355	1	36575.6		1	1	1	1	32432	6487.2	8.91583	79	0		220555	1	1	1	1	154023	62430.3	8.91583	79	0		110322	1	11396	123218	1	1	40823.2	8.91583	79	0		1	174079	1	60210	1	46858.4	8.91583
21.3533	1	1	57247	90194	1	124631	93085	1	45645.1		14623	91678	44478	1	64770	43110	21.3533	66	0		60241	1042	1	92873	81595	1	39292.2	21.3533	66	0		44902	79145	1	48853	57066	1	38328	21.3533	66	0		1526	96969	77264	65520	82554	64766.6	21.3533
10.3908	1	1	1	69692	69673	87639	89830	1	39604.8		240572	75314	1	1	1	63177.8	10.3908	115	0		53673	1	1	68152	70465	1	32048.8	10.3908	115	0		1	75741	3044	67207	70634	1	36104.7	10.3908	115	0		1771	116800	81739	105795	96511	80523.2	10.3908
12.6658	28601	32762	36850	53284	2049	64890	65218	35890	39943		91061	51711	30995	29875	29902	46708.8	12.6658	95	0		41218	79648	31072	53181	51888	26482	47248.2	12.6658	95	0		32294	54989	8195	44192	51388	29851	36818.2	12.6658	95	0		2659	86455	65598	56403	68529	55928.8	12.6658
18.62	1	1	101908	1	1	38114	81088	1	27639.4		1	1	75206	121068	113104	61876	18.62	102	0		138399	1	1	1	127162	240867	84405.2	18.62	102	0		1	40522	39878	107153	80706	143887	68691.2	18.62	102	0		1	1	1	1	1	1	18.62
10.3742	47508	53829	61773	1	1	95431	92894	1	43929.8		202024	1	1	49679	58660	62073	10.3742	130	0		1	65333	1	1	1	50038	19229.2	10.3742	130	0		1	72355	1	1	71273	1	23938.7	10.3742	130	0		1221	107123	1	93465	100047	60371.4	10.3742
9.395	1	1	1	1	42418	1	1	1	5303.12		1	1	1	88761	1	17753	9.395	147	0		1	1	1	1	1	83493	13916.3	9.395	147	0		1	531085	1	1	1	1	88515	9.395	147	0		443706	1	50827	1	1	98907.2	9.395
18.7325	1	72091	1	1	79408	157271	1	1	38596.9		149131	122454	1	1	95361	73389.6	18.7325	76	0		78847	1	80305	1	1	1	26526	18.7325	76	0		89931	1	1	1	124307	47839	43680	18.7325	76	0		1	189747	1	1	1	37950.2	18.7325
14.0592	35109	44213	56817	73887	54192	75402	27886	52969	52559.4		1	65544	54589	47621	51502	43851.4	14.0592	221	0		53827	12700	49848	64624	66411	1	41235.2	14.0592	221	0		49579	69151	1	60709	61809	1	40208.3	14.0592	221	0		6537	65665	64035	1	86147	44477	14.0592
26.0633	1	8035	1	3177	1	5866	5965	1	2880.88		1	1	13841	343848	474555	166449	26.0633	131	0		1	1	1	10778	1	20316	5183	26.0633	131	0		1	9899	40399	1	4869	344171	66556.7	26.0633	131	0		1	391	1	1	11215	2321.8	26.0633
12.65	1	929855	1	1	1	1	1	1	116233		1	1	1	757164	1	151434	12.65	83	0		1	1	1	1	1	1	1	12.65	83	0		1	1	1	1	1	1	1	12.65	83	0		1	1	1	1	1	1	12.65
19.3817	63860	1	1	1	202268	1	1	1	33266.8		1	206703	1	106651	1	62671.4	19.3817	115	0		1	1	119946	1	217940	93917	71967.7	19.3817	115	0		1	1	1	1	205055	85451	48418.3	19.3817	115	0		1	352818	31287	1	1	76821.6	19.3817
14.2275	15703	257568	1	1	1	1	26351	25289	40614.4		1	1	6503	1	1	1301.4	14.2275	103	0		354941	5401	25768	1	51437	163389	100156	14.2275	103	0		1	1	1	36281	1	280130	52735.8	14.2275	103	0		2947	1	1	7903	1	2170.6	14.2275
14.6858	46243	1	85944	1	67110	1	108207	1	38438.5		1	1	82480	1	127209	41938.4	14.6858	299	0		139286	9733	76469	85866	143930	1	75880.8	14.6858	299	0		115219	105262	1	101205	1	1	53614.8	14.6858	299	0		167	91171	1	1	1	18268.2	14.6858
18.8658	1	136537	140231	180361	1	1	1	188209	80667.8		1	1	1	85956	1	17192	18.8658	61	0		124599	1	1	1	244697	1	61550	18.8658	61	0		1	1	1	1	1	149888	24982.2	18.8658	61	0		1	1	1	1	1	1	18.8658
8.8	20274	33258	39551	1	36203	45326	62005	42047	34833.1		124623	72951	61863	48207	49124	71353.6	8.8	121	36520.5		66506	151712	52940	1	81198	34359	64452.7	8.8	121	0		68583	5452	2614	73183	51993	50754	42096.5	8.8	121	0		27147	1	4748	61419	3810	19425	8.8
28.445	1	1	1	1	1	44772	1	1	5597.38		88977	74300	265826	226190	93915	149842	28.445	73	144244		1	853	1	208071	1	1	34821.3	28.445	73	0		1	1	1	1	1	232814	38803.2	28.445	73	0		301923	1	1	1	1	60385.4	28.445
24.9658	1	1	106974	17751	1	12356	6243	1	17916		1	85480	176820	75075	140933	95661.8	24.9658	126	77745.8		221221	1	98439	75571	71723	126166	98853.5	24.9658	126	80937.5		134581	96135	74257	1	1	76674	63608.2	24.9658	126	0		1	1	24174	5642	13607	8685	24.9658
10.4567	188392	1	3360	10153	5325	15461	15351	8649	30836.5		3581	1	1	212091	231195	89373.8	10.4567	149	0		1	16690	254074	1	7295	193366	78571.2	10.4567	149	0		239954	1	1	1	3754	1	40618.7	10.4567	149	0		1607	10071	1	13540	7179	6479.6	10.4567
36.5425	1	98703	123825	1004	1	1	1520	91869	39615.5		2485	1	150435	149257	94297	79295	36.5425	73	0		121267	14598	135461	1	1	137061	68064.8	36.5425	73	0		141960	1	4405	1	1	217471	60639.8	36.5425	73	0		1	1	1	51960	1	10392.8	36.5425
14.9233	1	1	1	24288	1	1	1	1	3036.88		1	1	7544	1	34207	8350.8	14.9233	147	0		18700	5408	1	1	1	1403414	237921	14.9233	147	0		1	56533	66260	1	1	1	20466.2	14.9233	147	0		1	1	1	1	21987	4398.2	14.9233
18.8192	123925	124815	117649	1	12658	1	194488	1	71692.2		1	1	1	1	103944	20789.6	18.8192	102	0		128227	2166	1	1	189530	156466	79398.5	18.8192	102	0		99289	1	1	142381	1	144033	64284.3	18.8192	102	0		1	1	1	1	1	1	18.8192
18.665	129499	1	1	85880	8515	25274	38225	79032	45803.4		1	1	1	87881	66551	30887	18.665	72	0		117725	1	59831	1	62106	206828	74415.3	18.665	72	0		70268	1	59030	53666	1	50122	38848	18.665	72	0		1	29666	40274	83059	1	30600.2	18.665
10.4233	1	1	55254	68454	62105	85752	80945	56004	51064.5		172079	69273	1	1	1	48271	10.4233	134	0		57745	3346	1	66306	63937	40244	38596.5	10.4233	134	0		1	68568	1037	1	63877	1	22247.5	10.4233	134	0		2622	92165	70313	81228	88783	67022.2	10.4233
19.2208	79761	83737	1	1	94382	82195	1	1	42509.9		1	75746	1	1	157369	46623.6	19.2208	86	0		1	1	127236	1	1	176389	50604.8	19.2208	86	0		1	1	1663	1	189244	247486	73066	19.2208	86	0		1	101817	1	1	10221	22408.2	19.2208
21.9992	48854	41996	47482	25704	23128	44829	21119	29553	35333.1		1	92639	115560	77520	73102	71764.4	21.9992	205	36431.3		27066	1	37078	38103	22895	36266	26901.5	21.9992	205	0		69397	86665	39766	155325	44913	52015	74680.2	21.9992	205	74680.2		1	10877	99823	48693	35851	39049	21.9992
18.98	1	79241	76242	183412	1	36215	1	99603	59339.5		1	54441	1	84651	1	27819	18.98	147	0		103260	19832	157401	1	110859	324136	119248	18.98	147	0		1	1	43309	1	1	1	7219	18.98	147	0		1	1	59982	50088	1	22014.6	18.98
20.5133	1	153442	20820	49285	5771	95861	27538	71319	53004.6		5473	2364	13703	22781	85080	25880.2	20.5133	89	0		8746	1	46235	8604	5930	21671	15197.8	20.5133	89	0		58459	57166	8986	104961	3333	66006	49818.5	20.5133	89	0		1	7903	81657	784	27686	23606.2	20.5133
20.0183	1	93365	44139	41729	1	1	59451	83735	40302.8		7144	59423	106924	105726	80200	71883.4	20.0183	133	0		1	961	1	41998	117412	42401	33795.7	20.0183	133	0		144313	113205	1	74858	50135	1	63752.2	20.0183	133	0		1457	62177	113132	21700	52183	50129.8	20.0183
19.6325	1	1	59675	46248	279961	24300	25519	52449	61019.2		27220	55676	7892	10425	1	20242.8	19.6325	74	0		81214	1094	1	193026	84933	47200	67911.3	19.6325	74	0		41908	41231	232896	40292	33927	1	65042.5	19.6325	74	0		446	1	31086	98354	28804	31738.2	19.6325
10.965	82733	60467	40997	29581	37611	37185	44449	53880	48362.9		50193	56761	69840	74473	85900	67433.4	10.965	116	0		75900	1	127504	59996	47607	66064	62845.3	10.965	116	0		113832	1	1	101920	58902	1	45776.2	10.965	116	0		2065	34458	20726	57872	1	23024.4	10.965
13.0342	1	1	1	67538	1	36752	43059	1	18419.2		1	30046	1	1	1	6010	13.0342	73	0		1	485838	1	52429	1	1	89711.8	13.0342	73	0		1	1	166198	63212	121635	75859	71151	13.0342	73	0		274402	1	1	1	1	54881.2	13.0342
10.3367	1	1	40166	1	35297	26814	40527	61198	25500.6		73302	97132	112511	103444	1	77278	10.3367	244	51777.4		94662	19999	72330	190788	119107	1	82814.5	10.3367	244	57313.9		110683	1	1	78789	36717	1	37698.7	10.3367	244	0		1	52227	9	42729	40731	27139.4	10.3367
8.7425	13942	19899	18219	1	18540	27904	1	48550	18382		1	1	27650	1	62373	18005.2	8.7425	75	0		1	54208	45564	1	1	224275	54008.3	8.7425	75	0		47948	1	79937	1	1	1	21314.8	8.7425	75	0		148610	445896	1	61124	1	131126	8.7425
14.185	1	427357	1	1	1	1	1	1	53420.5		1	1	1	1	1	1	14.185	314	0		1	1	1	1	1	347122	57854.5	14.185	314	0		1	1	1	1	1	409037	68173.7	14.185	314	0		1	1	1	1	1	1	14.185
24.9067	1	1	1	54372	1	105512	31863	1	23969		1	87106	1	1	1	17422	24.9067	175	0		104163	1	1	209483	79608	230207	103910	24.9067	175	0		1	163731	106	205934	1	1	61629	24.9067	175	0		1	1	63148	6592	26758	19300	24.9067
14.1108	30505	1	50362	49496	81808	65449	54366	39872	46482.4		67590	67631	40752	23442	25386	44960.2	14.1108	88	0		1	1	34958	71901	30853	10869	24763.8	14.1108	88	0		8492	54509	103291	44312	69113	1	46619.7	14.1108	88	0		1169	70888	66479	90662	69341	59707.8	14.1108
11.3133	16771	25267	7920	24272	68550	16854	11879	24306	24477.4		83760	46015	35042	34685	31532	46206.8	11.3133	89	0		44746	27404	41652	66357	66793	69225	52696.2	11.3133	89	28218.8		37030	33554	1969	43518	21140	481812	103170	11.3133	89	0		1	38673	14917	53788	25321	26540	11.3133
18.7717	1	79786	1	1	52435	146323	1	1	34818.6		81682	109837	1	1	90310	56366.2	18.7717	151	0		1	19786	50065	47286	1	1	19523.3	18.7717	151	0		86950	90105	1	1	111442	67600	59349.8	18.7717	151	0		1	147158	1	98466	1	49125.4	18.7717
22.41	67700	68925	81224	1	92430	1	115955	1	53279.6		1	100112	1	67371	74499	48396.8	22.41	135	0		1	1	76887	97755	94044	1	44781.5	22.41	135	0		1	1	1	1	97883	1	16314.7	22.41	135	0		306	1	103307	132524	129046	73036.8	22.41
22.405	87197	86164	96994	1	1	1	156041	1	53300		1	1	1	74798	1	14960.4	22.405	115	0		1	562	111259	1	120527	1	38725.2	22.405	115	0		1	1	49610	1	126524	1	29356.3	22.405	115	0		1	1	138171	185209	183036	101284	22.405
13.2942	34295	1	1	61067	69967	31139	32071	65012	36694.1		1	42413	1	26204	1	13724	13.2942	73	0		1	299833	1	1	47782	1	57936.5	13.2942	73	0		1	1	66965	67116	1	44087	29695.2	13.2942	73	0		134440	92433	59226	1	63908	70001.6	13.2942
26.035	1	1	1	1	1	1	1	1	1		1	1	1	449389	583920	206662	26.035	205	0		1	1	1	1	1	1	1	26.035	205	#DIV/0!		1	1	103560	1	1	483246	97801.7	26.035	205	0		1	1	1	1	1	1	26.035
21.375	63951	65903	45765	78898	66746	92285	63278	51658	66060.5		24	47874	52075	56729	54256	42191.6	21.375	174	-23868.9		1	1	70670	65791	48153	1	30769.5	21.375	174	-35291		1	62403	67606	39164	58749	58254	47696.2	21.375	174	0		1	61599	54770	34512	43161	38808.6	21.375
13.2417	22606	21692	22658	1	37951	30867	43694	1	22433.8		160962	49932	1	23978	38569	54688.4	13.2417	75	0		1	270529	12739	1	1	38296	53594.5	13.2417	75	0		18432	55113	29400	1	30465	1	22235.3	13.2417	75	0		118069	45286	74971	58152	69065	73108.6	13.2417
11.9775	40999	121324	156415	29369	11931	43123	17011	88650	63602.8		13762	40349	36752	27625	36873	31072.2	11.9775	74	0		38405	10963	65327	35355	1	42079	32021.7	11.9775	74	0		83570	21350	5052	25950	50591	179130	60940.5	11.9775	74	0		1	16944	53452	12272	42944	25122.6	11.9775
8.06417	13383	94476	1	1	105613	1	1	102140	39452		332990	100791	83680	89995	1	121491	8.06417	61	0		1	1	4608	1	1	1	768.833	8.06417	61	0		1	2471	1	102361	1	1	17472.7	8.06417	61	0		1	1	2730	150329	22034	35019	8.06417
10.4283	1	1	77957	93541	93129	1	121675	78498	58100.4		1	101494	66957	1	1	33690.8	10.4283	87	0		78297	20902	1	1	89746	55539	40747.7	10.4283	87	0		1	95928	1	79416	1	1	29224.7	10.4283	87	0		7566	1	100915	1	122207	46138	10.4283
26.3108	27975	41085	34363	50837	55486	80511	71647	34450	49544.2		60773	49800	28072	27426	40488	41311.8	26.3108	99	0		8802	2655	44633	62810	48535	22035	31578.3	26.3108	99	0		49017	53205	49548	38090	51489	28256	44934.2	26.3108	99	0		112672	8474	57159	81303	47848	61491.2	26.3108
14.2725	1	1	1	1	1	1	1	1	1		1	1	158915	1	300497	91883	14.2725	299	0		1	800	1	1	1	805443	134374	14.2725	299	0		1	1	1	305219	1	1	50870.7	14.2725	299	0		1	1	1	31810	1	6362.8	14.2725
8.86167	68907	1	1	1	1	1	1	1	8614.25		14351	1	1	1	1	2871	8.86167	78	0		1	1	1	1	1	1	1	8.86167	78	0		1	469021	1	1	1	1	78171	8.86167	78	0		330485	1	316299	1	357862	200930	8.86167
18.82	51420	64325	65141	87224	1	1	127894	111910	63489.5		1	1	71433	63354	63353	39628.4	18.82	60	0		58080	1	1	1	131089	1	31528.8	18.82	60	0		63532	1	1	91203	1	69565	37383.8	18.82	60	0		1	1	109929	1	174872	56960.8	18.82
24.8958	64257	72456	109707	24917	174373	39530	12337	96072	74206.1		1148	39249	78815	59326	1	35707.8	24.8958	99	0		1	1	82338	1	33376	52758	28079.2	24.8958	99	0		88781	66930	83241	84834	102121	61283	81198.3	24.8958	99	0		13998	1	30855	6449	9854	12231.4	24.8958
10.35	53388	72272	76202	1	1	1	125331	72070	49908.2		1	1	69026	66331	75585	42188.8	10.35	87	0		1	133048	1	1	1	59936	32164.7	10.35	87	0		69750	1	2949	1	91108	1	27301.7	10.35	87	0		291	1	1	1	1	59	10.35
22.315	1	64057	1	93965	84190	105881	1	70140	52279.5		1	90553	1	1	72361	32583.4	22.315	227	0		1	1	1	98049	90311	1	31394	22.315	227	0		1	96409	116091	1	1	60319	45470.3	22.315	227	0		1	148740	1	127467	1	55242	22.315
22.4542	1	142518	1	208708	1	1	1	156608	63479.9		1	1	152020	1	1	30404.8	22.4542	101	0		161982	1	172201	1	195273	1	88243.2	22.4542	101	0		1	1	1	1	213548	1	35592.2	22.4542	101	0		1	41381	1	1	1	8277	22.4542
8.24167	3586	49245	57677	32980	60009	62546	459	55928	40303.8		206139	65455	43256	53778	38986	81522.8	8.24167	106	0		39859	4890	59364	67887	72601	1	40767	8.24167	106	0		63030	1	1	68832	63124	55081	41678.2	8.24167	106	0		1	42832	1	105659	1	29698.8	8.24167
9.10833	1	110063	137295	39864	1	58669	1	103888	56222.8		1	117716	122867	100540	1	68225	9.10833	79	0		118237	1	71209	163562	1	1	58835.2	9.10833	79	0		1	1	1	1	1	1	1	9.10833	79	1		1	93867	1	1	24107	23595.4	9.10833
12.7	37986	34398	57179	74581	1	93715	1	41750	42451.4		141922	1	40285	36532	39395	51627	12.7	100	0		1	126511	40434	1	58820	33004	43128.5	12.7	100	0		41089	60163	14575	1	69936	21857	34603.5	12.7	100	0		2430	120844	1	86192	1	41893.6	12.7
20.0508	10543	140764	18542	37795	1	85387	130395	36626	57506.6		26044	40600	1	1	50542	23437.6	20.0508	84	0		352147	1	1	1	82779	42466	79565.8	20.0508	84	0		45563	32055	23678	43706	6834	1	25306.2	20.0508	84	0		1	51385	33105	24389	34754	28726.8	20.0508
10.7125	24548	24110	26941	32102	31964	40274	42584	28871	31424.2		106240	32977	25325	24766	23819	42625.4	10.7125	261	0		22032	253584	29998	31503	30196	19583	64482.7	10.7125	261	0		26081	29711	508	32568	31140	52	20010	10.7125	261	0		183835	45300	28134	46398	40225	68778.4	10.7125
8.12167	1	124899	88002	20512	75938	1	49569	94419	56667.6		1	1	1	1	183875	36775.8	8.12167	147	0		1	1	35956	1	1	166969	33821.5	8.12167	147	0		93637	1	5115	69429	1	1	28030.7	8.12167	147	0		1	1	1	1	1	1	8.12167
26.315	19375	27737	22937	37715	36086	51276	48690	24470	33535.8		61330	33930	18936	17913	26849	31791.6	26.315	71	0		8739	2846	29454	40977	35393	15817	22204.3	26.315	71	0		31168	36341	40011	26249	36522	17539	31305	26.315	71	0		429161	9268	37259	54714	40003	114081	26.315
19.375	67551	1	1	1	190458	1	1	1	32251.9		1	193914	1	98066	64609	71318.2	19.375	102	0		1	1	105184	1	239613	92596	72899.3	19.375	102	0		1	1	1	1	190722	1	31787.8	19.375	102	0		1	339037	1	1	1	67808.2	19.375
22.2058	1	1	1	1	181100	1	1	1	22638.4		1	203823	126412	126200	154355	122158	22.2058	134	99519.8		1	1	143716	1	1	1	23953.5	22.2058	134	0		148916	1	1	174826	188625	1	85395	22.2058	134	0		1	1	1	1	1	1	22.2058
19.2225	88717	103216	1	1	1	85409	1	1	34668.4		1	143882	1	1	147196	58216.2	19.2225	100	0		1	1	120339	1	1	214614	55826.2	19.2225	100	0		1	1	1	1	227981	229869	76309	19.2225	100	0		1	1	1	1	1	1	19.2225
20.9367	1	80913	74971	38985	2853	42846	16215	40687	37183.9		3306	20236	87158	62696	66563	47991.8	20.9367	87	0		68668	1	94208	108801	62438	1	55686.2	20.9367	87	0		10178	50080	19460	21791	125643	50924	46346	20.9367	87	0		1	121147	19223	24711	22705	37557.4	20.9367
14.0142	30799	30178	51803	71227	24523	66287	49949	44289	46131.9		34961	30365	34475	47396	54706	40380.6	14.0142	66	0		62423	142577	39221	47481	60652	1	58725.8	14.0142	66	0		41882	48315	1	38949	38979	27769	32649.2	14.0142	66	0		73027	58265	42000	11379	48724	46679	14.0142
25.51	76829	72632	70120	30921	28767	22626	41645	66164	51213		22962	40418	60387	50176	46988	44186.2	25.51	204	0		10382	4648	69408	73838	1598	24012	30647.7	25.51	204	0		49136	65623	53124	34705	50349	82558	55915.8	25.51	204	0		1	14392	123029	9731	38560	37142.6	25.51
18.1425	37765	1	85773	1	59860	38113	33711	72510	40966.8		9805	87372	1	1	57874	31010.6	18.1425	105	0		1	1	1	78540	91746	26852	32856.8	18.1425	105	0		72037	74500	17554	86610	101049	1	58625.2	18.1425	105	0		1	1	111302	49859	93304	50893.4	18.1425
14.755	2322	4673	3203	25292	5292	6321	69212	2698	14876.6		18154	2872	3540	2911	15112	8517.8	14.755	341	0		29274	112933	3122	4149	5888	1	25894.5	14.755	341	0		3029	186813	65624	3329	2956	4776	44421.2	14.755	341	0		192456	59132	35734	11173	46832	69065.4	14.755
14.6942	12211	47852	41018	50645	38702	1	36195	42027	33581.4		131856	60275	49112	37221	67920	69276.8	14.6942	133	35695.4		60486	32947	28581	69002	78500	57272	54464.7	14.6942	133	0		34460	47377	54866	60301	48192	68465	52276.8	14.6942	133	52276.8		535	40322	30387	20136	40713	26418.6	14.6942
10.385	1	1	1	1	1	176370	1	1	22047.1		330966	1	1	1	87062	83606.2	10.385	88	0		89313	1	1	1	1	1	14886.3	10.385	88	0		1	113590	1	1	120663	1	39042.8	10.385	88	0		2231	178664	1	156900	1	67559.4	10.385
20.0267	1	1	107382	1	1	1	1	188379	36970.9		1	1	1	197274	1	39455.6	20.0267	75	0		1	1	1	1	233471	1	38912.7	20.0267	75	0		1	1	1	159034	1	1	26506.5	20.0267	75	0		34327	1	222530	94069	116086	93402.6	20.0267
11.535	9064	1207	23693	10630	31101	47458	67344	14225	25590.2		218912	83379	27741	6649	13187	69973.6	11.535	100	0		1	166827	43715	22343	68996	1	50313.8	11.535	100	0		38985	45742	5945	55261	51971	4070	33662.3	11.535	100	0		111685	30221	17200	104497	47768	62274.2	11.535
29.3342	89590	36978	50400	29008	55498	9299	14760	69276	44351.1		1	26464	53503	37053	38042	31012.6	29.3342	148	0		31906	3531	41775	1	38129	69723	30844.2	29.3342	148	0		34564	57881	365161	41606	34114	1288	89102.3	29.3342	148	0		3307	56001	45447	40657	25583	34199	29.3342
10.1867	53846	1	1	57407	1	1	1	133221	30559.9		25928	1	1	1	15775	8341.2	10.1867	147	0		1	3045	1	20368	1	49020	12072.7	10.1867	147	0		1	14959	1	1	87774	1	17122.8	10.1867	147	0		1	108282	1	108407	20193	47376.8	10.1867
12.1733	2084	1	1	92481	1	56862	133929	1	35670		1	77911	76822	122676	46374	64756.8	12.1733	73	0		1	11154	61484	56672	75408	1	34120	12.1733	73	0		1	1	31622	33201	1	166340	38527.7	12.1733	73	0		1	1	150590	1	118335	53785.6	12.1733
22.3833	57400	62718	71387	1	80406	95955	100879	1	58593.4		1	85187	1	58674	68383	42449.2	22.3833	239	0		68592	1	67956	1	82871	1	36570.3	22.3833	239	0		65007	1	1	1	80925	56034	33661.5	22.3833	239	0		1	1	89044	1	114326	40674.6	22.3833
24.5558	1	287592	1	1	1	123690	61509	1	59099.5		1	1	1	1	1	1	24.5558	73	0		1	1	1	147803	1	449324	99521.8	24.5558	73	0		1	1	1	1	1	1	1	24.5558	73	0		1	1	1	1	99031	19807	24.5558
13.8967	38181	16561	43930	16881	84095	18908	37190	25042	35098.5		23757	36440	37747	44378	17479	31960.2	13.8967	176	0		19038	8192	40304	36398	31242	121094	42711.3	13.8967	176	0		13238	32974	271370	18010	64986	29618	71699.3	13.8967	176	0		34964	49885	42975	124317	19226	54273.4	13.8967
10.4325	47406	47265	56530	67535	67970	84749	87906	55249	64326.2		1	72480	52699	47908	51587	44935	10.4325	115	0		50143	19852	52790	67526	69158	35531	49166.7	10.4325	115	0		52398	72294	1	66237	1	1	31822	10.4325	115	31822		7294	1	78592	1	94607	36099	10.4325
10.2242	1	1	1	1	1	5768	1	1	721.875		1	1	1	1	1	1	10.2242	117	0		1	1	1	1	1	1	1	10.2242	117	0		1	19225	1474440	1	1	13447	251186	10.2242	117	0		2724	1	19788	1	13994	7301.6	10.2242
17.415	155954	1	1	1	251099	1	1	1	50882.4		1	1	143841	172563	205846	104450	17.415	72	0		1	1	181267	1	1	104617	47648	17.415	72	0		1	1	1	1	1	164176	27363.5	17.415	72	0		255	92	1	1	33	76.4	17.415
17.9958	1	1	1	1	1	23616	30878	163766	27283.1		110	1	1	1	155222	31067	17.9958	61	0		237556	1	140085	1	90008	210179	112972	17.9958	61	0		1	34869	6152	1	1	1	6837.5	17.9958	61	0		1	1	58772	1	129684	37691.8	17.9958
10.2367	1	1	1	1	1	1	1	1	1		78944	1	1	1	1	15789.6	10.2367	75	0		1	6358	1	1	1	1	1060.5	10.2367	75	0		124264	1	1190731	1	1	1	219166	10.2367	75	0		100428	1	43695	1	1	28825.2	10.2367
20.5658	1	158263	7923	71280	105159	120063	1	1	57836.4		8131	1	1	12437	101249	24363.8	20.5658	156	0		14929	1	1	1	1	1	2489	20.5658	156	0		59594	1	1	103040	1	85130	41294.5	20.5658	156	0		1	13179	85636	1	40365	27836.4	20.5658
10.405	34018	36742	40801	51279	47569	64679	63533	40696	47414.6		142297	52060	35887	35334	39029	60921.4	10.405	144	0		41641	1	1	52205	50186	31140	29195.7	10.405	144	0		38274	51548	1	1	49125	1	23158.3	10.405	144	23158.3		2881	74903	53482	66481	69107	53370.8	10.405
18.185	1	1	1	280440	1	1	1	1	35055.9		1	1	192039	169494	1	72307.2	18.185	101	0		222091	1	203047	1	1	1	70857	18.185	101	0		1	1	1	1	1	1	1	18.185	101	0		1	1	1	1	1	1	18.185
17.0642	70247	1	45129	48274	1	67450	36961	76064	43015.9		9734	58404	22525	14221	52067	31390.2	17.0642	60	0		95238	1	24192	22797	53071	1	32550	17.0642	60	0		100757	33945	12361	103506	17774	86556	59149.8	17.0642	60	0		1	27564	38759	70693	23380	32079.4	17.0642
24.935	11362	51183	40754	19182	1	15285	14485	35613	23483.1		7651	40723	17233	36455	29173	26247	24.935	274	0		51678	1	30441	338282	23839	168605	102141	24.935	274	0		15732	51003	128215	31013	8107	34644	44785.7	24.935	274	0		1	148662	22065	36191	15957	44575.2	24.935
14.7792	21904	26794	38508	52041	48169	65229	62809	36441	43986.9		45203	48930	35827	28330	33709	38399.8	14.7792	105	0		30573	7404	42948	52140	54071	1	31189.5	14.7792	105	0		25657	47804	57304	45774	48293	23141	41328.8	14.7792	105	0		3105	79250	55170	65815	68913	54450.6	14.7792
8.395	202134	1	1	1	1	1	41268	97613	42627.5		35319	103468	123386	1	1	52435	8.395	79	0		1	169294	84375	1	88289	1	56993.5	8.395	79	0		112930	1	1	113189	109596	1	55953	8.395	79	0		1	10236	1	1	1617	2371.2	8.395
9.68167	4091	1	1	13287	1	1	88038	89374	24349.2		1	1	99977	1	1	19996.2	9.68167	79	0		1	440121	18127	137843	1	1	99349	9.68167	79	0		88148	70926	12202	104924	1	116876	65512.8	9.68167	79	0		1	1	1	79785	52163	26390.2	9.68167
19.5008	1	1	1	1	1	1	1	1	1		1	1	1	388750	1	77750.8	19.5008	230	0		1	1	1	1	235235	536931	128695	19.5008	230	0		1	1	45718	1	1	1	7620.5	19.5008	230	0		1	88713	1	235734	1	64890	19.5008
16.8883	1	13379	20431	26593	35036	16084	46425	18567	22064.5		117595	37801	40116	36135	77522	61833.8	16.8883	83	39769.3		70202	59667	13209	37493	22820	26909	38383.3	16.8883	83	0		19994	77384	48937	24619	27812	20122	36478	16.8883	83	0		1	110038	42998	24292	56286	46723	16.8883
11.9508	37763	162752	207827	9701	3142	47025	1	102901	71389		3877	18138	15921	17403	27719	16611.6	11.9508	61	0		27548	1	26640	36497	3212	21051	19158.2	11.9508	61	0		142570	15017	1384	19154	22720	211730	68762.5	11.9508	61	0		1	1	40979	1827	35924	15746.4	11.9508
18.7117	66441	80298	1	1	54194	1	1	1	25117.2		102626	118281	1	1	91020	62385.8	18.7117	129	0		1	1	67446	1	1	1	11241.8	18.7117	129	0		102609	1	1	1	122065	66053	48455	18.7117	129	0		1	158561	1	108892	1	53491.2	18.7117
17.0725	68082	46623	27868	31857	15192	42920	22113	66012	40083.4		10028	72617	27831	13623	20950	29009.8	17.0725	132	0		98889	1	34428	36662	73211	28992	45363.8	17.0725	132	0		129432	26450	9324	129393	18654	84952	66367.5	17.0725	132	0		713	21563	23620	100000	16530	32485.2	17.0725
9.42333	2394	1	30161	3399	1	45905	40323	1	15273.1		73129	20441	1	1	81675	35049.4	9.42333	61	0		4793	197801	16745	19861	18659	3356	43535.8	9.42333	61	0		275277	1	27273	270202	18387	1206	98724.3	9.42333	61	0		53907	39163	1	57427	48906	39880.8	9.42333
8.86917	3490	56623	1	67819	52562	62089	1	60484	37883.6		1	59869	55210	54797	57228	45421	8.86917	209	0		109001	1	68190	69133	75670	31098	58848.8	8.86917	209	0		1	1	280	1	1	64904	10864.7	8.86917	209	0		1	1	1	82282	1	16457.2	8.86917
18.7783	1	1	47774	53854	30203	75553	68091	45012	40061.1		55565	55693	31912	22792	1	33192.6	18.7783	89	0		33113	14140	30359	29279	59859	1	27791.8	18.7783	89	0		43756	49147	65863	44980	52609	1	42726	18.7783	89	0		1	88013	57787	58497	77254	56310.4	18.7783
10.43	1	1	57230	68568	67705	88708	83145	56317	52709.4		85570	73011	47531	1	1	41222.8	10.43	84	0		60518	113991	1	73550	74532	1	53765.5	10.43	84	0		1	67562	1	1	68524	1	22681.7	10.43	84	0		1	105196	68921	1	94006	53625	10.43
24.9017	1	1	1	67036	1	123061	38702	1	28600.5		68	103202	285521	1	1	77758.6	24.9017	102	0		1	1	1	1	94945	200715	49277.3	24.9017	102	0		1	1	94	250827	1	1	41820.8	24.9017	102	0		1	1	1	8279	31735	8003.4	24.9017
16.815	18301	51830	42655	75068	24308	62194	75759	39431	48693.2		14251	18667	26039	48350	36594	28780.2	16.815	86	0		121479	2232	57764	20960	9063	358513	95001.8	16.815	86	0		19709	52230	40106	27738	25397	34901	33346.8	16.815	86	0		1	33830	26093	24052	36554	24106	16.815
19.9617	1	153968	36872	1	1	43883	39809	1	34317		27110	87388	1	1	154017	53703.4	19.9617	75	0		1	1	1	1	107125	1	17855	19.9617	75	0		164591	71489	20924	635	103799	114847	79380.8	19.9617	75	0		62317	120441	44525	66534	1	58763.6	19.9617
9.03167	1	107857	40323	1	1	80707	31885	86639	43426.8		1	1	69770	103210	1	34596.6	9.03167	147	0		1	57017	1	77719	86914	72472	49020.7	9.03167	147	0		1	1	1	96247	98378	1	32438.2	9.03167	147	0		1	1	17541	1	96257	22760.2	9.03167
14.9658	1	103394	58588	72043	204715	20466	25680	126895	76472.8		6187	87444	41171	44393	29387	41716.4	14.9658	86	0		69340	1	82011	71298	1	1	37108.7	14.9658	86	0		10287	82131	28776	24738	22233	27329	32582.3	14.9658	86	0		1	61650	1	24882	14321	20171	14.9658
19.4075	1	1	51839	1	1	75676	1	1	15940.1		18281	1	122773	1	1	28211.4	19.4075	102	0		118002	1	1	211207	1	80529	68290.2	19.4075	102	0		1	1	136097	1	1	1	22683.7	19.4075	102	0		796	218996	1	297023	1	103363	19.4075
18.7933	47902	52930	57201	61562	19013	74027	85475	40332	54805.2		27259	50368	29472	29092	56031	38444.4	18.7933	264	0		50929	6358	1	16818	57330	36551	27997.8	18.7933	264	-26807.4		51234	37698	56445	55550	55334	49226	50914.5	18.7933	264	0		1	1	72296	36601	77176	37215	18.7933
26.0533	1	15886	1	7433	1	1	1	1	2915.62		1	1	28011	1	806495	166902	26.0533	89	0		1	242	1	1	1	37977	6370.5	26.0533	89	0		1	20407	81329	1	1	1	16956.7	26.0533	89	0		1	1	1	1	1	1	26.0533
22.435	1	1	119619	151694	137170	1	1	1	51061		1	145519	1	1	119416	52987.6	22.435	176	0		116796	1	122548	1	146858	1	64367.5	22.435	176	0		1	1	1	138231	143115	1	46891.7	22.435	176	0		1	1	1	1	1	1	22.435
25.4333	49191	32333	1	18093	1	26627	15567	39643	22682		1995	112397	190983	1	1	61075.4	25.4333	103	0		11601	1	48093	58781	33153	76122	37958.5	25.4333	103	0		96506	115847	25234	161825	56388	1	75966.8	25.4333	103	75966.8		5757	1	78208	44756	30616	31867.6	25.4333
17.6983	63882	84642	60644	1	2100	27989	40434	29391	38635.4		3611	64781	97709	96856	126573	77906	17.6983	75	0		94560	1	112213	1	16537	1	37218.8	17.6983	75	0		65833	146550	12542	1793	84012	13875	54100.8	17.6983	75	0		699	15169	1	80015	1	19177	17.6983
10.115	25829	1	26258	1	1	1	94694	1	18348.2		1	105417	1	112577	1	43599.4	10.115	147	0		132808	1	1	1	1	1	22135.5	10.115	147	0		1	12591	1	1	91883	1	17413	10.115	147	0		1	78320	1	109658	5721	38740.2	10.115
12.8158	108151	27076	26112	90242	26780	63993	96469	46130	60619.1		38866	36196	34981	49727	46554	41264.8	12.8158	66	0		1	1	42568	63204	53466	55075	35719.2	12.8158	66	0		1	26084	39760	1	1	53552	19899.8	12.8158	66	19899.8		1	57873	1	59205	49984	33412.8	12.8158
8.86083	40858	29399	8861	42217	12527	32621	72422	119131	44754.5		55387	35514	72101	75971	59295	59653.6	8.86083	89	0		111305	1	64019	38925	46016	77740	56334.3	8.86083	89	0		53173	1	26377	40234	24699	80302	37464.3	8.86083	89	0		1	64646	1	1	1	12930	8.86083
26.2125	191188	1	289366	1	1	1	1	1	60070		1	1	222832	1	1	44567.2	26.2125	105	0		1	1	1	1	1	146042	24341.2	26.2125	105	0		1	1	362786	282572	1	1	107560	26.2125	105	0		1	1	1	1	1	1	26.2125
8.93	11499	17914	12441	55960	53301	46919	26314	79663	38001.4		1	1	105276	96354	85230	57372.4	8.93	83	0		144251	14100	75691	1	1	104261	56384.2	8.93	83	0		39282	1	1779	1	10407	106423	26315.5	8.93	83	0		1	106086	1	15844	6831	25752.6	8.93
11.2525	1	44687	1	1	98526	74485	1	1	27212.9		1	64174	1	1	58247	24484.8	11.2525	103	0		34239	1	79337	80340	93219	1	47856.2	11.2525	103	0		64531	60303	1	68066	62374	469562	120806	11.2525	103	0		1	1	1	369	93353	18745	11.2525
16.8908	26631	14561	19140	23771	28674	12079	34455	15479	21848.8		112323	34001	24497	33423	60058	52860.4	16.8908	77	31011.7		60777	71153	19038	36059	25344	45594	42994.2	16.8908	77	21145.4		17056	71017	43944	23079	26832	29203	35188.5	16.8908	77	0		2189	98055	44962	25619	49520	44069	16.8908
8.86667	7076	59747	1	72247	56412	68138	1	63412	40879.2		1	64186	58292	57535	60917	48186.2	8.86667	191	0		109276	1	71772	73145	80160	1	55725.8	8.86667	191	0		1	1	562	1	1	67662	11371.3	8.86667	191	0		1	1	1	88462	1	17693.2	8.86667
17.9642	1	1	1	1	1	1	1	1	1		1	1	1	1	615834	123168	17.9642	147	0		1	4108	598295	1	229229	1	138606	17.9642	147	0		1	1	26285	1	1	1	4381.67	17.9642	147	0		1	1	1	1	1	1	17.9642
28.7358	1	1	1	106	2752	1	307	1	396.25		108155	218	294	1	193	21772.2	28.7358	217	0		1	1	1	943332	207	1	157257	28.7358	217	0		1	1	1	551	346	270025	45154.2	28.7358	217	0		450	431	1	1	1	176.8	28.7358
25.9617	250503	1	1	1	1	1	1	1	31313.8		1	1	270061	1	1	54013	25.9617	101	0		1	1	1	1	1	177407	29568.7	25.9617	101	0		1	1	441866	345911	1	2031	131635	25.9617	101	0		1	1	1	1	1	1	25.9617
9.54417	1	80380	1	1	1	1	1	83577	20495.4		1	1	63582	95447	79173	47640.8	9.54417	147	0		193665	1	102295	1	1	73522	61580.8	9.54417	147	0		1	86798	69883	1	1	1	26114.2	9.54417	147	0		1	72556	70494	1	1	28610.6	9.54417
20.0992	1	1	24641	50818	400	1	196751	54019	40829		2403	1	3497	12374	1	3655.2	20.0992	247	0		541933	1	1	1706	113633	1	109546	20.0992	247	0		65662	35563	21567	56405	1	1	29866.5	20.0992	247	0		1	1	40699	28451	45443	22919	20.0992
8.92083	74315	1	85909	1	1	1	113638	1	34233.4		236257	1	1	1	1	47252.2	8.92083	208	0		1	687859	1	1	1	1	114644	8.92083	208	0		88732	368	1	105162	92350	1	47769	8.92083	208	0		1	1	1	1	514	103.6	8.92083
10.7133	1	1	30151	1	1	1	26449	1	7075.75		1	26145	16479	1	24208	13366.8	10.7133	66	0		1	613673	1	1	1	35416	108182	10.7133	66	0		1	36020	24557	1	1	1	10096.8	10.7133	66	0		503330	30386	31917	1	1	113127	10.7133
22.8175	1	1	1	1	1	1	1	1	1		1	1	1	1	1	1	22.8175	73	#DIV/0!		1	1	1	1	663072	810693	245628	22.8175	73	0		1	1	1	1	1	1	1	22.8175	73	#DIV/0!		3725	1	1	1	1	745.8	22.8175
11.3117	33021	48349	3449	31432	61004	26757	1	21450	28182.9		65161	34931	1	13666	69214	36594.6	11.3117	75	0		43841	293667	55150	1	1	70231	77148.5	11.3117	75	0		57909	1	1	1	26822	163845	41429.8	11.3117	75	0		71930	11356	2788	45285	31449	32561.6	11.3117
14.865	1	358993	1	1	1	1	1	1	44875		1	1	1	319141	345348	132898	14.865	74	0		446147	5620	1	1	1	1	75295.2	14.865	74	0		1	1	1	1	1	1	1	14.865	74	0		1042	1	1	1	1	209.2	14.865
21.2992	74253	90141	96512	1	142949	1	1	1	50482.4		1	1	83449	90830	115570	57970.2	21.2992	86	0		1	1449	98005	1	1	23019	20412.7	21.2992	86	0		88208	40605	1	46775	108158	66557	58384	21.2992	86	0		2611	1	1	1	1	523	21.2992
21.1833	1	1	1	1	1	1	1	1	1		1	1	701190	1	1	140239	21.1833	74	0		1	1	1	1	1	418276	69713.5	21.1833	74	0		1	1	35489	1	1	1	5915.67	21.1833	74	0		1	57162	42029	1	1	19838.8	21.1833
10.6842	18054	22464	19185	27534	24701	33981	34990	1	22613.8		77095	24563	19129	18161	18928	31575.2	10.6842	65	0		20980	291027	25092	26523	26632	21912	68694.3	10.6842	65	0		21024	27751	238	23616	26884	5129	17440.3	10.6842	65	0		235176	37968	25749	32424	33242	72911.8	10.6842
14.0467	1	941041	1	1	1	1	1	1	117631		1	1	1	1	1	1	14.0467	158	0		1	1	1	1	1	1	1	14.0467	158	0		1	1	6184	1	1	522398	88097.7	14.0467	158	0		1	1	1	1	1	1	14.0467
18.5525	1	1	74192	1	60797	43383	1	1	22297.1		1	92399	73189	1	91339	51385.8	18.5525	74	0		130179	15372	130919	1	133169	1	68273.5	18.5525	74	0		92610	64697	13998	1	1	119320	48437.8	18.5525	74	0		12862	1	1	1	101773	22927.6	18.5525
12.6333	1	27150	26933	22379	50720	17258	38417	38586	27680.5		58375	60417	61333	43777	52500	55280.4	12.6333	192	27599.9		49203	22793	50506	69178	68770	53620	52345	12.6333	192	24664.5		67111	59140	49298	54968	30837	50724	52013	12.6333	192	52013		12019	47221	50790	43794	36971	38159	12.6333
9.47917	22802	1	1	72750	1	1	55667	1	18903		1	99536	102763	74505	1	55361.2	9.47917	79	0		1	1	1	131260	1	107171	39739.2	9.47917	79	0		94542	1	1	121521	101794	1	52976.7	9.47917	79	0		1	1	1	60662	1	12133.2	9.47917
22.1733	40592	1	1	71496	72064	1	90894	59664	41839.1		1	77685	40691	48698	59923	45399.6	22.1733	88	0		59125	1	52366	1	1	26098	22932	22.1733	88	0		58406	1	1	61693	73123	30988	37368.7	22.1733	88	0		1	124154	1	1	106493	46130	22.1733
26.0108	24177	46329	53028	38512	11925	81295	56544	51664	45434.2		28284	65099	34577	33837	49677	42294.8	26.0108	76	0		6573	2972	42891	60041	9960	17797	23372.3	26.0108	76	0		50245	61200	57465	46799	53604	22214	48587.8	26.0108	76	0		1444	3813	60106	18385	41056	24960.8	26.0108
22.4925	353926	364565	1	1	1	1	1	1	89812.1		1	1	1	362190	1	72438.8	22.4925	328	0		1	1	1	1	1	1	1	22.4925	328	0		1	1	19049	1	1	355722	62462.5	22.4925	328	0		1	1	1	1	1	1	22.4925
24.8667	66139	79189	1	23578	89819	41105	12209	92504	50568		1	34449	78755	51785	1	32998.2	24.8667	85	0		51426	1	74225	90927	33319	49681	49929.8	24.8667	85	0		108701	60829	1	82783	1	70169	53747.3	24.8667	85	0		38275	1	37376	3883	10385	17984	24.8667
24.9992	1	78954	93585	1	1	1	14451	83149	33767.9		8004	50008	1	71557	84364	42786.8	24.9992	129	0		68183	1	90578	257759	1	93512	85005.7	24.9992	129	0		78003	1	1	1	1	69526	24588.8	24.9992	129	0		1	118877	1	31893	16586	33471.6	24.9992
10.9758	130404	76060	56119	1	54332	1	55202	51370	52936.1		156970	82806	55979	49039	64229	81804.6	10.9758	75	0		1	1	85379	1	1	81254	27772.8	10.9758	75	0		86872	1	1	1	1	62587	24910.5	10.9758	75	0		11552	1	1	91432	1	20597.4	10.9758
22.2525	40675	39271	46423	59803	1	71250	70304	43743	46433.8		165983	43525	1	1	1	41902.2	22.2525	196	0		1	1	42023	57850	62337	26281	31415.5	22.2525	196	0		39104	57035	60112	1	48366	34027	39774.2	22.2525	196	0		1	92965	67013	83447	1	48685.4	22.2525
26.5033	1	1	1	30799	33027	53772	52238	103039	34109.8		1	120889	1	1	99092	43996.8	26.5033	147	0		1	937	73150	32882	28298	1	22544.8	26.5033	147	0		45014	100572	1	80792	46433	50472	53880.7	26.5033	147	0		1	5451	91903	183202	35768	63265	26.5033
19.9417	1	130550	1	58887	1	33684	1	1	27890.8		13252	54887	1	1	157448	45117.8	19.9417	147	0		1	16615	159683	1	74094	46512	49484.3	19.9417	147	0		156601	23458	1	1	104816	159084	73993.5	19.9417	147	0		1	83334	40392	26602	1	30066	19.9417
22.8417	290169	1	1	1	79586	1	1	107286	59630.8		15418	43477	1	1	1	11779.6	22.8417	147	0		1	1	1	79338	119190	1	33088.7	22.8417	147	0		1	1	65658	1	1	174757	40069.8	22.8417	147	0		1	88016	1	1	83345	34272.8	22.8417
9.21083	900	2149	1655	7866	2446	3212	4228	2729	3148.12		7059	2024	2935	1	1	2404	9.21083	207	0		4483	52860	1	2984	3301	1	10605	9.21083	207	0		1955	206223	1	3024	2275	1	35579.8	9.21083	207	0		900312	1	1	2271	225248	225567	9.21083
11.8225	73342	83749	59980	85294	67199	55168	1	52674	59675.9		1	1	1	81554	1	16311.6	11.8225	66	-43364.3		1	14948	80371	1	1	193365	48114.5	11.8225	66	0		1	1	23431	1	88950	1	18730.8	11.8225	66	18730.8		1457	148733	103436	29452	1	56615.8	11.8225
12.66	185224	218089	1	1	14909	1	1	241112	82417.2		1	1	201134	184887	1	77204.8	12.66	115	0		1	1	1	1	1	1	1	12.66	115	0		202706	1	12363	1	1	179170	65707	12.66	115	0		6925	1	1	1	1	1385.8	12.66
22.6933	1	1	1	1	1	1	45	1	6.5		96063	1	1	1	1	19213.4	22.6933	75	0		1	1	1	1	1	139320	23220.8	22.6933	75	0		190036	129484	1	238320	1	1	92973.8	22.6933	75	92973.8		1	1	1	1	1	1	22.6933
22.3742	1	1	1	1	1	227734	246240	1	59247.5		1	1	1	1	1	1	22.3742	189	0		1	1	165364	1	1	1	27561.5	22.3742	189	0		1	1	1	1	1	1	1	22.3742	189	0		1	1	1	279789	280470	112052	22.3742
26.3192	21857	49929	26412	62664	59531	1	75236	31219	40856.1		98052	1	22382	23035	47816	38257.2	26.3192	60	0		12799	4729	40600	63348	59762	15542	32796.7	26.3192	60	0		51274	1	49037	30735	60582	1	31938.3	26.3192	60	0		1	13250	1	90915	66337	34100.8	26.3192
22.5525	201412	218931	1	1	1	1	1	1	52543.6		1	1	1	216993	1	43399.4	22.5525	64	0		1	156	1	1	1	132125	22047.5	22.5525	64	0		1	77344	105915	1	1	179158	60403.3	22.5525	64	0		1554	1	59483	1	1	12208	22.5525
20.6508	255008	1	1	111662	281117	67926	71002	1	98339.8		1	1	205624	1	1	41125.6	20.6508	73	0		1	12791	1	328715	1	1	56918.3	20.6508	73	0		12410	1	1	1	1	1	2069.17	20.6508	73	0		1	1	1	1	1	1	20.6508
17.0717	63631	42175	24699	30976	13797	39380	20288	61716	37082.8		8731	68014	29877	14519	19933	28214.8	17.0717	104	0		98744	1	34136	32587	68434	26211	43352.2	17.0717	104	0		122843	25474	8178	120885	17082	75370	61638.7	17.0717	104	0		1	19820	20526	98701	15251	30859.8	17.0717
22.3567	1	1	1	103443	1	1	1	1	12931.2		1	103866	80856	1	85629	54070.6	22.3567	102	0		1	1	102357	1	106359	1	34786.7	22.3567	102	0		83063	1	123614	1	108281	55729	61781.5	22.3567	102	0		1	188036	1	1	1	37608	22.3567
19.7342	53893	68959	1	1	174034	1	1	131023	53489.1		1	1	1	1	1	1	19.7342	73	0		1	1	1	1	1	230537	38423.7	19.7342	73	0		231403	151351	1	1	1	1	63793	19.7342	73	0		1	194211	94614	1	7764	59318.2	19.7342
24.6892	1	1	1	1	1	1	1	1	1		1	1	1	1	274896	54980	24.6892	73	0		1	1949	237874	1	1	1	39971.2	24.6892	73	0		284560	1	1	1	143208	1	71295.3	24.6892	73	0		1	1	1	58948	1	11790.4	24.6892
26.2033	127145	1	190359	1	1	1	1	179229	62092.2		1	1	151837	119865	1	54341	26.2033	101	0		1	1	1	1	1	94583	15764.7	26.2033	101	0		1	1	243587	185065	1	1	71442.7	26.2033	101	0		1230	1	1	1	1	246.8	26.2033
14.705	4305	1	17975	12175	18283	480380	17166	2999	69160.5		126853	41014	32811	26708	50859	55649	14.705	131	0		24164	42369	23445	49820	40348	1	30024.5	14.705	131	0		18443	23600	45461	36140	27457	45041	32690.3	14.705	131	0		1	16358	5163	13304	17706	10506.4	14.705
18.575	1	1	210549	1	134260	1	1	1	43101.9		1	1	1	193816	1	38764	18.575	147	0		237701	1	1	1	173595	1	68550	18.575	147	0		1	1	1	1	94084	1	15681.5	18.575	147	0		1	50320	1	1	1	10064.8	18.575
18.795	51185	54219	53396	56712	18058	65659	77277	37052	51694.8		26760	45408	27654	28318	57271	37082.2	18.795	309	0		47446	5824	1	16117	52135	36202	26287.5	18.795	309	-25407.2		50356	34930	52185	51113	49643	55278	48917.5	18.795	309	0		1	90	65290	34407	68860	33729.6	18.795
26.6383	1	25003	1	33006	49852	53836	62199	1	27987.4		25082	94899	1	1	83869	40770.4	26.6383	189	0		7146	1	59735	38111	32922	1	22986	26.6383	189	0		37438	86949	1	1	50186	52779	37892.3	26.6383	189	0		1	5144	87663	161152	40155	58823	26.6383
20.0983	1	1	27884	44938	1	1	142937	36112	31484.4		11218	1	18239	24660	4456	11714.8	20.0983	133	0		479821	88	1	10171	89596	39979	103276	20.0983	133	0		59955	43000	15832	54525	14803	1	31352.7	20.0983	133	0		1	1	43790	9707	44315	19562.8	20.0983
10.9742	130482	51065	40025	1	28941	1	35737	50591	42105.4		113501	52382	57903	47368	43588	62948.4	10.9742	148	0		1	1	57842	118961	82370	57820	52832.5	10.9742	148	0		56221	1	1	51717	1	41540	24913.5	10.9742	148	0		7962	24751	1	44918	1	15526.6	10.9742
10.2467	82374	1	1	1	1	42090	221461	103226	56144.4		1	1	1	66782	1	13357.2	10.2467	79	0		1	1	62300	1	1	114683	29497.8	10.2467	79	0		115615	135170	144893	1	1	97459	82189.8	10.2467	79	0		1	1	1	1	1	1	10.2467
18.6058	1	1	1	151478	1	40226	62635	1	31793		1	1	100832	1	96660	39499	18.6058	116	0		1	1	129632	1	134246	209257	78856.3	18.6058	116	0		1	31234	24332	82290	1	163009	50144.5	18.6058	116	0		1	1	1	1	1	1	18.6058
21.4017	27268	29205	45596	72316	40861	95029	63167	51559	53125.1		1	58157	32859	1	41311	26465.8	21.4017	82	0		45007	1	35688	58369	48272	1	31223	21.4017	82	0		34552	56698	75834	33111	47027	27650	45812	21.4017	82	0		1	56862	56547	35368	49432	39642	21.4017
22.2608	40835	1	1	1	1	1	81086	1	15240.9		204713	53165	1	37928	1	59161.6	22.2608	161	0		1	1	45430	71117	69300	1	30975	22.2608	161	0		1	66985	72225	1	52046	36491	37958.2	22.2608	161	0		1	108102	75941	96913	1	56191.6	22.2608
22.3117	1	36351	47315	61537	55244	1	80627	48185	41157.6		1	62429	1	1	1	12486.6	22.3117	71	0		39032	1	1	1	60586	1	16603.7	22.3117	71	0		43038	65062	69892	56955	1	1	39158.2	22.3117	71	0		265906	105289	72133	91806	1	107027	22.3117
20.1008	1	1	22772	38073	1	1	161673	44050	33321.5		4215	1	5782	12018	7546	5912.4	20.1008	158	0		616245	1	1	1	91526	1	117962	20.1008	158	0		57201	29644	1	46376	1	1	22204	20.1008	158	0		1	1	34470	23986	40564	19804.4	20.1008
8.30583	66733	48241	1	130013	73031	72054	1	1	48759.4		1	74268	1	1	117138	38281.8	8.30583	75	0		1	1	1	1	1	1	1	8.30583	75	-48758.4		1	793	1	1	1	1	133	8.30583	75	133		1	1	16929	110642	1	25514.8	8.30583
8.65417	1	98446	115893	1	1	1	21202	89662	40650.9		1	88593	1	89294	1	35578	8.65417	79	0		1	1	1	146853	57807	1	34110.7	8.65417	79	0		97753	1	1	102379	99771	1	49984.3	8.65417	79	0		1	33924	1	1	50872	16959.8	8.65417
18.6433	1	111576	66150	150436	1	1	79851	1	51002.1		1	94658	99906	98165	1	58546.2	18.6433	74	0		1	1	1	67980	137892	1	34312.7	18.6433	74	0		1	51666	46153	94010	68553	1	43397.3	18.6433	74	0		606	1	1	1	60911	12304	18.6433
26.015	27151	40917	50693	37764	14509	84759	57344	49921	45382.2		30688	61316	40141	36694	47796	43327	26.015	77	0		7313	1	38251	59638	10095	26660	23659.7	26.015	77	0		45571	58091	55337	46922	54504	20389	46802.3	26.015	77	0		1702	3639	55049	15385	40810	23317	26.015
19.7058	1	1	193392	261726	1	1	12302	213141	85070.6		1	1	1	133767	1	26754.2	19.7058	73	0		1	1	1	1	1	1	1	19.7058	73	0		1	1	1	1	1	212523	35421.3	19.7058	73	0		1	1	261537	1	73644	67036.8	19.7058
9.5675	1	1	1	115576	1	1	1	1	14447.9		1	1	1	62440	1	12488.8	9.5675	73	0		1	1	401856	1	1	1	66976.8	9.5675	73	0		1	500164	1	1	1	1	83361.5	9.5675	73	0		181695	1	119924	1	1	60324.4	9.5675
26.2258	131845	1	182822	1	1	1	1	170021	60586.6		1	1	143818	122139	1	53192	26.2258	130	0		1	1	1	1	1	97294	16216.5	26.2258	130	0		1	1	231160	187392	1	1	69759.3	26.2258	130	0		920	1	1	1	1	184.8	26.2258
14.1867	1	1	1	1	1	1	1	1	1		1	1	1	1	1	1	14.1867	207	#DIV/0!		406082	1	1	1	1	304808	118482	14.1867	207	0		1	1	1	1	1	318002	53001.2	14.1867	207	0		1	1	1	1	1	1	14.1867
12.6608	169665	187091	1	1	27545	1	1	208518	74102.9		20469	1	1	175982	1	39290.8	12.6608	131	0		1	1	195337	1	1	1	32557	12.6608	131	0		187706	1	25370	1	1	172763	64307	12.6608	131	0		24795	1	1	1	1	4959.8	12.6608
12.4933	1	1	81746	80199	1	1	1	72556	29313.2		1	84221	133680	170519	118438	101372	12.4933	147	72058.6		1	1	83763	56106	1	22966	27139.7	12.4933	147	0		1	1	1	77444	1	1	12908.2	12.4933	147	0		1	43294	98528	1	1	28365	12.4933
10.6583	14362	32413	40148	44400	38615	64584	31616	37008	37893.2		108986	35761	24475	32258	34250	47146	10.6583	66	0		32664	1	31316	53348	44864	1	27032.3	10.6583	66	0		1	1	1	29841	33537	128559	31990	10.6583	66	0		1	49232	1	1	46086	19064.2	10.6583
9.31667	74518	114089	1	1	75434	1	1	96778	45102.9		1	1	99352	88456	1	37562.2	9.31667	207	0		272374	2209	1	1	1	15714	48383.3	9.31667	207	0		280	725	152	1	1	124275	20905.7	9.31667	207	0		1616	1	31119	1	1	6547.6	9.31667
8.99917	56860	68043	53399	1	1	1	64822	1	30391		109169	109306	1	1	1	43695.6	8.99917	97	0		1	101219	1	104336	123401	1	54826.5	8.99917	97	0		115185	5465	1	99964	57473	116806	65815.7	8.99917	97	0		9548	1	1	75726	5983	18251.8	8.99917
23.49	1	36259	44553	24589	389485	21775	60814	1	72184.6		8776	27391	14051	27829	1	15609.6	23.49	174	0		28272	1	1	39179	48576	70153	31030.3	23.49	174	0		1	18966	17628	27343	1	41788	17621.2	23.49	174	0		1	26967	131672	59619	22685	48188.8	23.49
10.1125	1	80618	125949	1	1	1	203819	1	51298.9		1	1	104651	1	1	20931	10.1125	79	0		1	1	28885	1	32253	1	10190.3	10.1125	79	0		1	130438	1	116535	137299	112049	82720.5	10.1125	79	0		1	88575	1243	1	1	17964.2	10.1125
16.0367	102827	59587	27544	57195	1	41352	53595	62668	50596.1		27060	47371	21080	75416	83168	50819	16.0367	75	0		116642	1	1	1	1	1	19441.2	16.0367	75	0		50788	36621	80440	11708	42518	1	37012.7	16.0367	75	0		3111	1	37180	60606	61071	32393.8	16.0367
17.4225	84750	92995	107769	1	120679	1	1	1	50774.6		1	1	85672	86404	104143	55244.2	17.4225	85	0		1	1	96383	1	1	42137	23087.3	17.4225	85	0		98096	149098	1	1	133382	88625	78200.5	17.4225	85	0		6681	1	1	1	1	1337	17.4225
18.0983	201611	1	1	1	1	1	1	1	25202.2		1	1	1	1	1	1	18.0983	174	0		1	1	1	1	1	1	1	18.0983	174	0		1	1	1	1	1	1	1	18.0983	174	0		1	1009936	1	1	1	201988	18.0983
24.9417	61613	1	112624	23265	97397	41963	1	103969	55104.1		1	1	69992	62613	109276	48376.6	24.9417	98	0		47694	1	77030	85825	32580	1	40521.8	24.9417	98	0		91143	64144	16233	81359	108890	65358	71187.8	24.9417	98	0		1	1	29368	1	1	5874.4	24.9417
15.305	42318	85998	57893	23098	133565	74009	24529	46235	60955.6		11626	12797	13741	14773	32003	16988	15.305	130	-43967.6		14902	5483	19158	22368	30247	44399	22759.5	15.305	130	-38196.1		67909	40035	106218	45751	9473	86274	59276.7	15.305	130	0		1	8666	39725	36588	17285	20453	15.305
18.3508	1	1	1	1	126371	116912	182304	1	53199		50428	1	1	1	1	10086.4	18.3508	116	0		1	115	1	1	1	1	20	18.3508	116	0		1	116601	55834	1	1	1	28739.8	18.3508	116	0		1592	1	142237	1	192123	67190.8	18.3508
21.2525	1	64689	95311	82856	55070	12091	99561	1	51197.5		761	15536	68793	29834	52436	33472	21.2525	118	0		41651	1	40545	16265	18859	52466	28297.8	21.2525	118	0		86323	12808	4704	19912	102762	38545	44175.7	21.2525	118	0		1	4265	5835	15849	82845	21759	21.2525
21.2975	1	107206	109694	1	162220	1	1	1	47390.6		1	1	97672	108559	125673	66381.2	21.2975	103	0		1	38	1	1	1	53254	8882.67	21.2975	103	0		101347	1	1	1	107436	1	34797.8	21.2975	103	0		1	1	1	1	1	1	21.2975
27.2025	203142	52118	1	16742	29702	1	7926	90092	49965.5		15061	1	1	1	1	3013	27.2025	73	0		35036	1	36449	98911	36952	35693	40507	27.2025	73	0		48306	110438	58762	82582	18594	94463	68857.5	27.2025	73	0		8218	19568	65577	1	1	18673	27.2025
10.4267	1	1	1	119101	110739	1	1	97529	40921.8		1	121472	85431	1	91100	59601	10.4267	132	0		99206	5039	1	116708	113517	1	55745.3	10.4267	132	0		1	120428	2483	1	1	1	20485.8	10.4267	132	0		7774	1	122801	1	1	26115.6	10.4267
17.4325	62687	71745	81987	1	98794	1	1	1	39402.1		1	92838	66853	63635	78280	60321.4	17.4325	113	0		1	1	76907	1	42242	44054	27201	17.4325	113	0		70202	97345	256	59158	102822	67011	66132.3	17.4325	113	0		1009	54627	1	68530	1	24833.6	17.4325
22.4692	1	1	273002	131848	1	1	1	1	50607		1	1	1	1	1	1	22.4692	103	0		187437	1	132993	1	188796	1	84871.5	22.4692	103	0		1	1	1	134703	255043	1	64958.3	22.4692	103	0		1	1	1	1	1	1	22.4692
8.0675	50889	144050	1	1	71054	1	85209	1	43900.8		145611	1	145733	1	1	58269.4	8.0675	79	0		177731	1	1	1	1	1	29622.7	8.0675	79	0		1	1	1	164457	168986	1	55574.5	8.0675	79	0		969	1	1329	157734	1	32006.8	8.0675
19.6717	25287	80199	16924	33829	25621	16325	13152	45243	32072.5		5986	40093	52758	77604	61066	47501.4	19.6717	185	0		123639	1	37850	34719	46427	111434	59011.7	19.6717	185	0		40392	67184	9884	46963	43675	70904	46500.3	19.6717	185	0		1	31059	57125	26212	19060	26691.4	19.6717
13.465	36775	1	1	30267	1	32109	41083	84368	28075.6		1	109410	1	1	62046	34291.8	13.465	73	0		1	49148	1	1	116611	1	27627.2	13.465	73	0		1	1	79297	117713	23873	123368	57375.5	13.465	73	0		1	74348	21291	35723	70832	40439	13.465
22.3717	42420	1	1	37391	41044	1	66766	1	23453.1		1	1	1	1	1	1	22.3717	64	0		30109	1	1	1	1	17477	7931.67	22.3717	64	0		1	1	261727	1	1	1	43622	22.3717	64	0		1	389922	1	81990	1	94383	22.3717
18.3592	76775	67003	39097	73667	18396	39244	33000	42002	48648		8967	38804	1	29447	37178	22879.4	18.3592	84	-25768.6		117980	1	1	15839	34144	31085	33175	18.3592	84	0		75158	35108	17987	38134	25777	74425	44431.5	18.3592	84	0		5547	1	46330	38734	33025	24727.4	18.3592
12.4267	9110	28934	30809	35411	17347	18019	23028	30162	24102.5		42250	44636	54545	41817	58762	48402	12.4267	221	24299.5		118819	35062	37016	26648	51743	50816	53350.7	12.4267	221	29248.2		47037	44953	38646	40821	29068	46920	41240.8	12.4267	221	41240.8		26539	43605	33663	34364	51232	37880.6	12.4267
8.06333	4172	79909	1	1	93453	1	1	88998	33317		269284	94151	72497	83598	1	103906	8.06333	60	0		1	1	1806	1	1	1	301.833	8.06333	60	0		1	365	1	91367	1	1	15289.3	8.06333	60	0		1	1	463	131309	5385	27431.8	8.06333
21.2225	1	168505	188296	1	1	1	1	1	44600.9		9842	1	135652	78539	1	44807	21.2225	61	0		1	1	1	1	1	72404	12068.2	21.2225	61	0		180590	1	1	1	234738	1	69222	21.2225	61	0		1119	28593	1	1	1	5943	21.2225
13.8992	32661	15233	38398	15567	72486	17760	32748	22592	30930.6		21744	32696	33096	39880	15993	28681.8	13.8992	130	0		17639	1138	36885	32327	53942	104627	41093	13.8992	130	0		12139	31546	227490	16371	57728	26241	61919.2	13.8992	130	0		1558	45090	38027	106126	18465	41853.2	13.8992
10.0367	59857	50207	1	39404	35907	29372	94152	19500	41050		92813	32356	6713	28532	32454	38573.6	10.0367	75	0		64866	53407	1	1	1	6787	20843.8	10.0367	75	0		36953	52831	41258	1	18710	1	24959	10.0367	75	0		178072	61026	21658	57137	45817	72742	10.0367
8.11833	11202	1	1	96737	1	1	1	1	13493.1		1	1	1	1	1	1	8.11833	73	0		1	1	1	1	1	373383	62231.3	8.11833	73	0		1	22153	1	1	1	1	3693	8.11833	73	0		1	1	210666	1	281225	98378.8	8.11833
16.87	1720	11717	18328	22894	31171	14959	41610	16912	19913.9		102876	34669	35953	33675	72089	55852.4	16.87	180	35938.5		61481	46158	11335	33372	20284	25950	33096.7	16.87	180	0		18418	67670	43222	22474	25232	18046	32510.3	16.87	180	0		499	97740	37564	21486	51375	41732.8	16.87
9.32333	1	20327	17686	34524	17895	26620	1	1	14631.9		45025	16979	1	1	32751	18951.4	9.32333	75	0		1	399638	1	1	1	1	66607.2	9.32333	75	0		20096	26698	1	1	16552	1	10558.2	9.32333	75	0		220118	38962	1	26999	43015	65819	9.32333
16.7875	24033	57755	33068	22903	44167	1	1	22597	25565.6		1	1	1	116242	33082	29865.4	16.7875	255	0		25462	1	25485	1	33815	1	14127.5	16.7875	255	0		7916	1	1	25233	46611	88755	28086.2	16.7875	255	0		1	1	84414	18026	32736	27035.6	16.7875
12.8333	53835	36077	34082	43056	37146	49034	69179	51800	46776.1		24650	32616	29380	39004	41187	33367.4	12.8333	129	-13408.7		32918	4514	45457	30605	35531	53453	33746.3	12.8333	129	0		39731	33161	33052	31326	40816	38323	36068.2	12.8333	129	0		1	38854	39488	47807	32777	31785.4	12.8333
22.9217	15488	5756	3669	1140	1341	4994	2445	6763	5199.5		1041	3200	1	11053	5789	4216.8	22.9217	71	0		1	1153	1	1	5177	3043	1562.67	22.9217	71	0		7157	895	6030	1278	5627	11272	5376.5	22.9217	71	0		1216141	4955	516	3861	1739	245442	22.9217
18.7458	1	1	1	2117	1	1	92	1	276.875		1	1	1	1	1	1	18.7458	190	0		1	1	215563	1	1	1	35928	18.7458	190	0		1	1	1	1	1	1	1	18.7458	190	0		1	658883	1	1	280	131833	18.7458
13.005	181720	1	1	1	1	1	90529	27031	37410.6		1	1	1	110117	31917	28407.4	13.005	73	0		1	1	1	1	66429	1	11072.3	13.005	73	0		1	57115	1	122993	1	81762	43645.5	13.005	73	0		1	122687	26227	1	127866	55356.4	13.005
24.9308	48260	1	90280	32086	92933	49347	1	89876	50348		719	1	55887	1	96088	30539.2	24.9308	68	0		54145	1	1	87892	40393	39364	36966	24.9308	68	0		82917	70913	25754	82765	104598	51202	69691.5	24.9308	68	0		1	1	36540	1	5141	8336.8	24.9308
30.1567	16464	20732	10253	1	2396	1	1	1	6231.12		287489	8268	11244	6817	5260	63815.6	30.1567	73	0		8011	17576	12169	271777	5085	12614	54538.7	30.1567	73	0		4201	1	2729	4899	4178	67987	13999.2	30.1567	73	0		1	1	1	1	1	1	30.1567
9.27	28278	109587	133695	41166	1	58012	1	97612	58544		1	28416	111614	84123	1	44831	9.27	79	0		1	1	1	155381	1	109303	44114.7	9.27	79	0		96357	1	5971	118748	1	1	36846.5	9.27	79	0		1	1	7831	1	1	1567	9.27
19.4383	37470	1	63357	1	50301	1	69505	66173	35851.1		1	86572	52139	1	1	27742.8	19.4383	71	0		50655	1	51887	77145	1	1	29948.3	19.4383	71	0		61368	88163	1	70946	69329	38203	54668.3	19.4383	71	0		1	87649	83729	96976	61469	65964.8	19.4383
11.605	13213	46313	42501	50148	10589	55864	19660	22920	32651		16990	62318	38052	48220	52511	43618.2	11.605	150	0		57386	1	45121	32258	30862	45590	35203	11.605	150	0		45683	58317	2310	53190	60235	48741	44746	11.605	150	0		1	51530	64114	3111	80230	39797.2	11.605
8.98583	273599	61775	48193	1	53243	63909	40624	1	67668.1		104483	103180	1	1	1	41533.2	8.98583	75	0		1	1	86000	1	21830	1	17972.3	8.98583	75	0		85092	1	1	27819	48517	1	26905.2	8.98583	75	0		1	1	1	86958	1	17392.4	8.98583
15.9225	40146	47027	24946	57208	1	1	37225	44981	31441.9		1	1	39051	69520	94988	40712.2	15.9225	101	0		83357	4203	1	1	1	253382	56824.2	15.9225	101	0		29260	55443	21149	1	1	62861	28119.2	15.9225	101	0		1	38660	57537	1	30350	25309.8	15.9225
8.80667	1062	1253	1097	1769	1063	1029	1578	2290	1392.62		2703	2317	3156	2793	2401	2674	8.80667	208	1281.38		3733	1	2005	1	3283	51724	10124.5	8.80667	208	0		2465	141428	1	2343	1433	3653	25220.5	8.80667	208	0		654477	159889	118898	1576	155999	218168	8.80667
21.4225	64768	57673	34140	32551	79678	40081	40801	70764	52557		528	23886	28471	53723	96109	40543.4	21.4225	91	0		33038	1	1	1	29471	93687	26033.2	21.4225	91	0		38482	64781	982	42079	44924	53681	40821.5	21.4225	91	0		1	21686	50777	26171	25491	24825.2	21.4225
38.4267	83681	2985	44685	1111	7759	1	1	30830	21381.6		47705	102662	250930	114372	23381	107810	38.4267	73	86428.4		389	161	11635	191296	34211	20081	42962.2	38.4267	73	0		31910	1	49294	125460	16839	1	37250.8	38.4267	73	0		1	1000	1	75393	545	15388	38.4267
22.4008	1	41208	54282	1	62955	1	1	1	19806.2		1	69228	1	47707	1	23387.6	22.4008	71	0		1	379	1	1	1	1	64	22.4008	71	0		50032	1	28573	64251	64795	44195	41974.5	22.4008	71	0		344962	1	71563	91542	88883	119390	22.4008
10.4075	24067	29425	34648	40350	42240	54533	60037	32700	39750		98193	44680	30076	27144	31498	46318.2	10.4075	85	0		34922	139830	35802	48022	52998	1	51929.2	10.4075	85	0		35885	41493	1	1	47075	1	20742.7	10.4075	85	0		1	64069	41153	56946	60415	44516.8	10.4075
18.1567	64676	79747	89151	1	82770	1	34589	87839	54846.8		4477	91873	1	1	84543	36179	18.1567	118	0		1	1	83381	58563	1	1	23658	18.1567	118	0		1	45805	13605	1	102863	1	27046	18.1567	118	0		1	30546	1	60384	88061	35798.6	18.1567
15.0642	42642	19336	43549	26280	128284	43139	46505	41072	48850.9		12514	23673	42566	20683	27117	25310.6	15.0642	66	0		36861	1	39922	21792	75327	117003	48484.3	15.0642	66	0		1	68520	1	36542	20382	28873	25719.8	15.0642	66	0		1	50044	52067	15945	34998	30611	15.0642
17.4792	82190	40186	56315	26740	8662	24704	39610	38291	39587.2		21308	19476	50316	52943	37729	36354.4	17.4792	96	0		42400	1859	63150	39542	36622	10353	32321	17.4792	96	0		35599	84782	6964	38345	44430	51726	43641	17.4792	96	0		186	43637	28647	35024	41961	29891	17.4792
21.2233	1	81634	106468	1	1	34200	1	1	27788.4		1	36303	1	66558	75254	35623.4	21.2233	66	0		72689	1	81077	40834	41644	1	39374.3	21.2233	66	0		86584	32532	14589	33147	123757	36015	54437.3	21.2233	66	0		1509	11578	1	1	1	2618	21.2233
10.93	1	6290	1	2291	1	1	1	1	1073.38		14310	299	1	1	4741	3870.4	10.93	75	0		24204	329025	15827	1	1	12570	63604.7	10.93	75	0		8013	1	12054	1	1	854041	145685	10.93	75	0		29658	2534	1	1	5300	7498.8	10.93
19.55	1	1	90024	125572	78780	1	1	91543	48240.4		1	1	69488	50591	3402	24696.6	19.55	67	0		64226	1127	6588	94670	63300	44477	45731.3	19.55	67	0		1	117478	1	93386	1	1	35144.7	19.55	67	0		6671	77449	111312	1	1	39086.8	19.55
18.0367	1	1	1	228029	1	1	1	136250	45535.6		1677	1	124935	199528	1	65228.4	18.0367	72	0		1	1	1	1	1	174521	29087.7	18.0367	72	0		1	1	1	1	1	1	1	18.0367	72	0		255	1	1	1	100232	20098	18.0367
22.1025	1	1	1	1	1	16384	1	1	2048.88		1	1	1	1	1	1	22.1025	73	0		362601	15488	1	1	1	241617	103285	22.1025	73	0		1	146244	1	1	1	1	24374.8	22.1025	73	0		5365	11219	1	1	123947	28106.6	22.1025
10.3483	72505	73185	1	51195	1	1	1	1	24611.2		1	1	211790	149676	1	72293.8	10.3483	77	0		180801	1	111553	1	1	1	48726.3	10.3483	77	0		197438	1	1	165307	1	1	60458.2	10.3483	77	0		1	1	1	105251	1	21051	10.3483
20.7917	1	89945	88013	1	1	187746	82194	1	55987.8		1	167263	1	1	1	33453.4	20.7917	73	0		1	1228	1	1	1	1	205.5	20.7917	73	0		124692	79375	1	1	1	1	34011.8	20.7917	73	0		1	104949	1	1	143588	49708	20.7917
12.625	42708	25358	63590	1	1	1	91678	39507	32855.5		21200	42879	48728	14323	25655	30557	12.625	79	0		12294	1	34402	53946	44533	62962	34689.7	12.625	79	0		1	53526	15325	34507	40095	25498	28158.7	12.625	79	0		4223	50939	75710	13776	107538	50437.2	12.625
34.5467	1	1	1	770	1254887	1	187	357	157026		8033	292	1	118	189	1726.6	34.5467	73	0		1	10820	1	5997	2747	104	3278.33	34.5467	73	0		1	1	1	1	1	1	1	34.5467	73	0		1	1	1	26274	1	5255.6	34.5467
8.86833	320130	1	1	63387	44514	1	1	1	53504.5		1	205397	1	44655	57985	61607.8	8.86833	75	0		1	1	1	1	1	1	1	8.86833	75	0		1	104518	1	105176	1	1	34949.7	8.86833	75	0		71665	1	1	1	83427	31019	8.86833
22.1608	87835	1	1	1	77098	1	1	79816	30594.2		1	84374	47594	67617	61277	52172.6	22.1608	71	0		59892	1	68809	1	1	1	21450.8	22.1608	71	0		68468	5380	1	72086	89050	51188	47695.5	22.1608	71	0		217304	1	1	1	1	43461.6	22.1608
8.56083	1	90764	1	1	1	14926	16328	1	15252.9		236220	1	1	23928	1	52030.2	8.56083	147	0		1	1	4197	1	1	1	700.333	8.56083	147	0		77749	1	1	1	80181	1	26322.3	8.56083	147	0		1	40138	1	1	232180	54464.2	8.56083
9.29417	19535	78716	1	44392	9436	1	1	55663	25968.1		1	1	1	1	1	1	9.29417	75	0		37205	296323	1	1	1	58786	65386.2	9.29417	75	0		1	1	132946	1	1	144251	46200.2	9.29417	75	0		1	1	1	1	1	1	9.29417
9.3675	1	104064	1	17190	56934	52222	48181	1	34824.2		1	7862	1	103656	1	22304.2	9.3675	147	0		182452	1	1	1	114112	76107	62112.3	9.3675	147	0		1	1	72483	1	1	39462	18658.2	9.3675	147	0		1	29981	37277	8808	1	15213.6	9.3675
29.4867	40750	12815	16973	26070	426096	8857	13544	12168	69659.1		4620	27127	38917	38741	21467	26174.4	29.4867	73	0		43803	1204	21505	1	50681	82817	33335.2	29.4867	73	0		12448	40069	163360	22931	18216	3637	43443.5	29.4867	73	0		73948	1	1	54857	1	25761.6	29.4867
10.49	62184	83167	1	53759	37143	56198	1	1	36556.8		1	87130	95674	117351	80718	76174.8	10.49	167	0		166472	1338	66484	1	1	1	39049.5	10.49	167	0		61241	124608	1	81782	1	1	44605.7	10.49	167	0		1	1	35588	1	1	7118.4	10.49
19.4525	499	1	4132	1523	158096	1	223	2146	20827.6		1	96151	83040	54003	1	46639.2	19.4525	306	0		58299	1	1	132968	1	52874	40690.7	19.4525	306	0		550	2998	50463	1206	121457	1	29445.8	19.4525	306	0		1	291010	2260	180412	1	94736.8	19.4525
14.27	1	343366	1	1	1	1	1	1	42921.6		1	1	1	1	1	1	14.27	193	0		350519	1	1	1	1	288977	106583	14.27	193	0		1	1	1	39700	1	270394	51683	14.27	193	0		1	1	1	2362	1	473.2	14.27
18.1058	35067	43509	48029	52773	50112	29318	26064	43958	41103.8		4620	57579	39600	37480	38405	35536.8	18.1058	89	0		42630	1125	35608	43496	59015	16304	33029.7	18.1058	89	0		38645	35954	11667	1	56091	1	23726.5	18.1058	89	0		1	30451	63584	46686	66898	41524	18.1058
8.27	159811	1	1	1	1	1	1	1	19977.2		1	1	1	65379	1	13076.6	8.27	73	0		1	420787	1	1	1	1	70132	8.27	73	0		1	1	1	49916	1	96009	24321.5	8.27	73	0		203125	1	1	1	65149	53655.4	8.27
14.0225	23562	37631	39668	47757	1	62931	42273	39461	36660.5		21617	48066	34111	34125	39470	35477.8	14.0225	76	0		38270	53224	43448	47902	44347	31964	43192.5	14.0225	76	0		38114	1	1	41356	46169	21376	24502.8	14.0225	76	0		28289	68526	46708	11274	62002	43359.8	14.0225
17.6025	1	95061	81779	101649	27558	37468	1	33906	47177.9		1	57631	1	107977	1	33122.2	17.6025	75	0		87340	1	1	1	11101	101060	33250.7	17.6025	75	0		69265	1	50114	1	89561	20129	38178.5	17.6025	75	0		3452	1	1	103007	1	21292.4	17.6025
12.22	1	51084	1	1	1	1	1	1	6386.38		1	130980	1	1	1	26196.8	12.22	147	0		163628	1	1	127292	1	1	48487.3	12.22	147	0		75689	113883	1	1	1	105329	49150.7	12.22	147	0		1	65911	134871	21912	40770	52693	12.22
11.9492	30434	170744	209267	9141	1	43156	1	127813	73819.6		1	9928	1	4103	13027	5412	11.9492	243	0		14131	1	8403	19124	1	1	6943.5	11.9492	243	0		157021	1	1	27497	7631	172821	60828.7	11.9492	243	0		1	1	23085	1	24217	9461	11.9492
8.21583	224350	1	12231	43835	19472	1	1	1	37486.5		96169	16239	1	1	1	22482.2	8.21583	117	0		50491	1	17464	20999	20166	266	18231.2	8.21583	117	0		16466	1	1	21758	20135	1	9727	8.21583	117	0		1	78234	960	65888	1	29016.8	8.21583
37.5392	49977	6384	35400	881	2323	51714	10707	40417	24725.4		979	197724	263459	64341	31616	111624	37.5392	73	0		1143	14302	1	389	22678	22626	10189.8	37.5392	73	0		33292	35726	34630	154854	1	18574	46179.5	37.5392	73	0		36430	1	13015	16679	2035	13632	37.5392
11.825	47945	45360	46621	56046	56261	34525	76541	33282	49572.6		43852	1	31830	45334	25375	29278.4	11.825	148	-20294.2		47464	236	49805	1	1	127454	37493.5	11.825	148	0		35856	1	8691	1	53284	1	16305.7	11.825	148	16305.7		135872	80007	62568	23945	1	60478.6	11.825
22.1783	37391	1	1	65597	66552	1	82752	53933	38278.5		1	70844	38584	42727	53181	41067.4	22.1783	99	0		50903	1	48502	1	1	21008	20069.3	22.1783	99	0		50874	1	1	57284	67703	28235	34016.3	22.1783	99	0		34741	114087	1	1	97005	49167	22.1783
26.2042	189507	1	179483	1	1	1	1	1	46124.5		1	1	261231	152979	1	82842.6	26.2042	204	0		1	1	1	1	74803	1	12468	26.2042	204	0		89667	45483	61663	216861	1	1	68946	26.2042	204	0		142	1	1	1	1	29.2	26.2042
10.8308	92667	3405	1	68739	58105	1	1	142695	45701.8		137711	1	85168	47050	1	53986.2	10.8308	147	0		135102	1	1	1	1	83287	36398.8	10.8308	147	0		15805	1	223735	101258	1	1	56800.2	10.8308	147	0		1	1	1	1	1	1	10.8308
10.6908	1	1	166635	1	1	1	1	177093	42966.8		1	1	164647	1	1	32930.2	10.6908	60	0		1	1	187401	1	1	1	31234.3	10.6908	60	0		1	1	1	1	188548	174207	60459.8	10.6908	60	0		1	1	1	1	1	1	10.6908
12.6833	1	30054	31716	42070	424	42329	54823	34008	29428.1		55200	38431	30276	29304	28197	36281.6	12.6833	234	0		28855	44124	32691	38670	43109	22795	35040.7	12.6833	234	0		32649	46072	2663	34632	33465	27292	29462.2	12.6833	234	0		1	69152	47997	33405	57692	41649.4	12.6833
19.0792	1	1	14021	155552	48728	1	100564	35324	44274		89690	77652	1	4362	1	34341.2	19.0792	75	0		49559	45416	1	1	1	1	15829.8	19.0792	75	0		84400	21387	23759	1	81729	1	35212.8	19.0792	75	0		47518	92728	1	131520	85107	71374.8	19.0792
22.0008	36172	29207	37894	19566	18792	35976	17274	20353	26904.2		1	73511	90877	57836	57390	55923	22.0008	217	29018.8		15999	1	27612	31189	18335	22181	19219.5	22.0008	217	0		52581	69840	30809	123250	35412	35163	57842.5	22.0008	217	57842.5		1	9440	79622	37736	29425	31244.8	22.0008
16.1858	22573	34243	11729	35670	51708	13407	8749	37071	26893.8		4225	45026	80481	42336	95583	53530.2	16.1858	102	0		56965	1	30829	28603	70773	95698	47144.8	16.1858	102	0		52432	17902	94804	41597	16554	15753	39840.3	16.1858	102	0		1	20076	15286	22932	12307	14120.4	16.1858
28.6283	469938	53017	116324	3567	10126	3165	12544	71748	92553.6		4235	12241	15829	3031	6482	8363.6	28.6283	74	0		1742	2276	30875	1	16001	107	8500.33	28.6283	74	0		85999	107570	1	38061	26954	5118	43950.5	28.6283	74	0		502	15779	25637	39026	2467	16682.2	28.6283
21.2933	79198	1	104951	1	170118	1	1	1	44284		1	1	1	95049	107843	40579	21.2933	76	0		1	1	103995	1	1	49044	25507.2	21.2933	76	0		99156	1	1	1	120129	63366	47109	21.2933	76	0		1	1	1	1	1	1	21.2933
26.0658	17686	5173	15261	3223	1	4581	6496	5883	7288		4371	11548	13709	219947	317677	113450	26.0658	148	0		1335	236	1	11314	3876	17803	5760.83	26.0658	148	0		6185	9022	40794	17625	5105	227430	51026.8	26.0658	148	0		1	1	11804	1	13449	5051.2	26.0658
14.8017	23723	26006	38321	1	1	55823	1	31952	21978.5		66406	54830	37189	24909	33827	43432.2	14.8017	84	0		1	11000	31142	61016	56235	15922	29219.3	14.8017	84	0		1	48767	64647	1	1	26027	23240.7	14.8017	84	0		188	84469	58827	75887	73524	58579	14.8017
8.79833	15165	28944	31378	29132	27140	36388	45411	32127	30710.6		94290	56875	43692	38465	41171	54898.6	8.79833	116	24188		56622	60555	41794	57912	60130	1	46169	8.79833	116	0		53910	1	3042	55511	39310	41275	32174.8	8.79833	116	0		8466	1	5000	45501	2123	12218.2	8.79833
9.55333	1	1	124095	12321	1	1	1	92740	28645.1		1	1	95026	21206	1	23247	9.55333	79	0		1	387093	18678	1	1	95687	83576.8	9.55333	79	0		1	76291	2639	1	111965	128385	53213.7	9.55333	79	0		1	1	21395	1	1	4279.8	9.55333
21.0158	1	1	46629	41152	92829	16802	28037	32425	32234.5		2552	30190	1	51494	48702	26587.8	21.0158	101	0		78562	1	1	63005	37997	294259	78970.8	21.0158	101	0		32990	20403	23646	32898	1	1	18323.2	21.0158	101	0		1	40908	22302	50105	28652	28393.6	21.0158
10.9025	90065	1	77518	1	1	80317	1	63030	38866.8		329363	1	72303	1	6683	81670.2	10.9025	79	0		1	334798	1	1	1	1	55800.5	10.9025	79	0		1	1	1	1	1	129009	21502.3	10.9025	79	0		21605	1	1	1	1	4321.8	10.9025
9.73167	1	36429	4285	28736	1	1	1	75035	18061.1		1	1	68251	111896	69274	49884.6	9.73167	147	0		1	1	1	134099	126351	81811	57044	9.73167	147	0		1	1	1	110200	1	1	18367.5	9.73167	147	0		1	74823	24702	21067	1	24118.8	9.73167
9.91917	1	1	1	29252	1	1	43661	56573	16186.4		1	726	1	49768	31535	16406.2	9.91917	73	0		1	2201	15000	1	1	1	2867.5	9.91917	73	0		1	101892	108883	1	1	773123	163984	9.91917	73	0		1	47748	1	1	1	9550.4	9.91917
19.2192	25999	30092	49142	31333	29448	29422	25744	36999	32272.4		30917	25357	46257	50338	56755	41924.8	19.2192	175	0		41425	1	39716	56826	45418	54024	39568.3	19.2192	175	0		33713	57418	6171	34084	62865	85895	46691	19.2192	175	0		603	26642	30125	22713	34343	22885.2	19.2192
25.9925	39140	38987	49809	25816	9849	50296	36504	46476	37109.6		16555	58359	45134	34036	47150	40246.8	25.9925	175	0		4614	1127	38140	43161	7289	28919	20541.7	25.9925	175	0		43933	54161	67636	57596	36781	35696	49300.5	25.9925	175	0		1	2008	60881	13075	28424	20877.8	25.9925
24.9425	61908	70436	1	1	144171	1	11187	85917	46702.8		5206	1	67804	61874	106413	48259.6	24.9425	99	0		59551	1	1	227154	25370	67996	63345.5	24.9425	99	0		1	1	1	1	1	1	1	24.9425	99	0		5097	92744	1	23337	12272	26690.2	24.9425
14.9967	30670	59642	34039	38772	136105	7310	13731	92982	51656.4		10145	50871	23802	26997	17391	25841.2	14.9967	113	0		38285	1	48832	42768	97652	1	37923.2	14.9967	113	0		1	49377	15509	13398	12611	16157	17842.2	14.9967	113	0		1	35904	112971	12788	7748	33882.4	14.9967
[truncated: 40,553 more rows]
[truncated: 11 more columns]

## Sheet: EE2
RT (min)	Mass	EE2 - CTL
10.7183	73	0
26.2942	73	0
11.1633	73	0
18.7992	73	0
14.7767	73	0
10.7175	116	0
[truncated: 42,165 more rows]

## Sheet: DEET
RT (min)	Mass	DEET - CTL
[truncated: 42,171 more rows]

[truncated: 3 more sheets: Diphen, Fluox, Mix]
